# Supplementary material
Source: PubMed Central journal article supplement (PMC8095368)

# Sample 151507: Clustering (unsupervised)

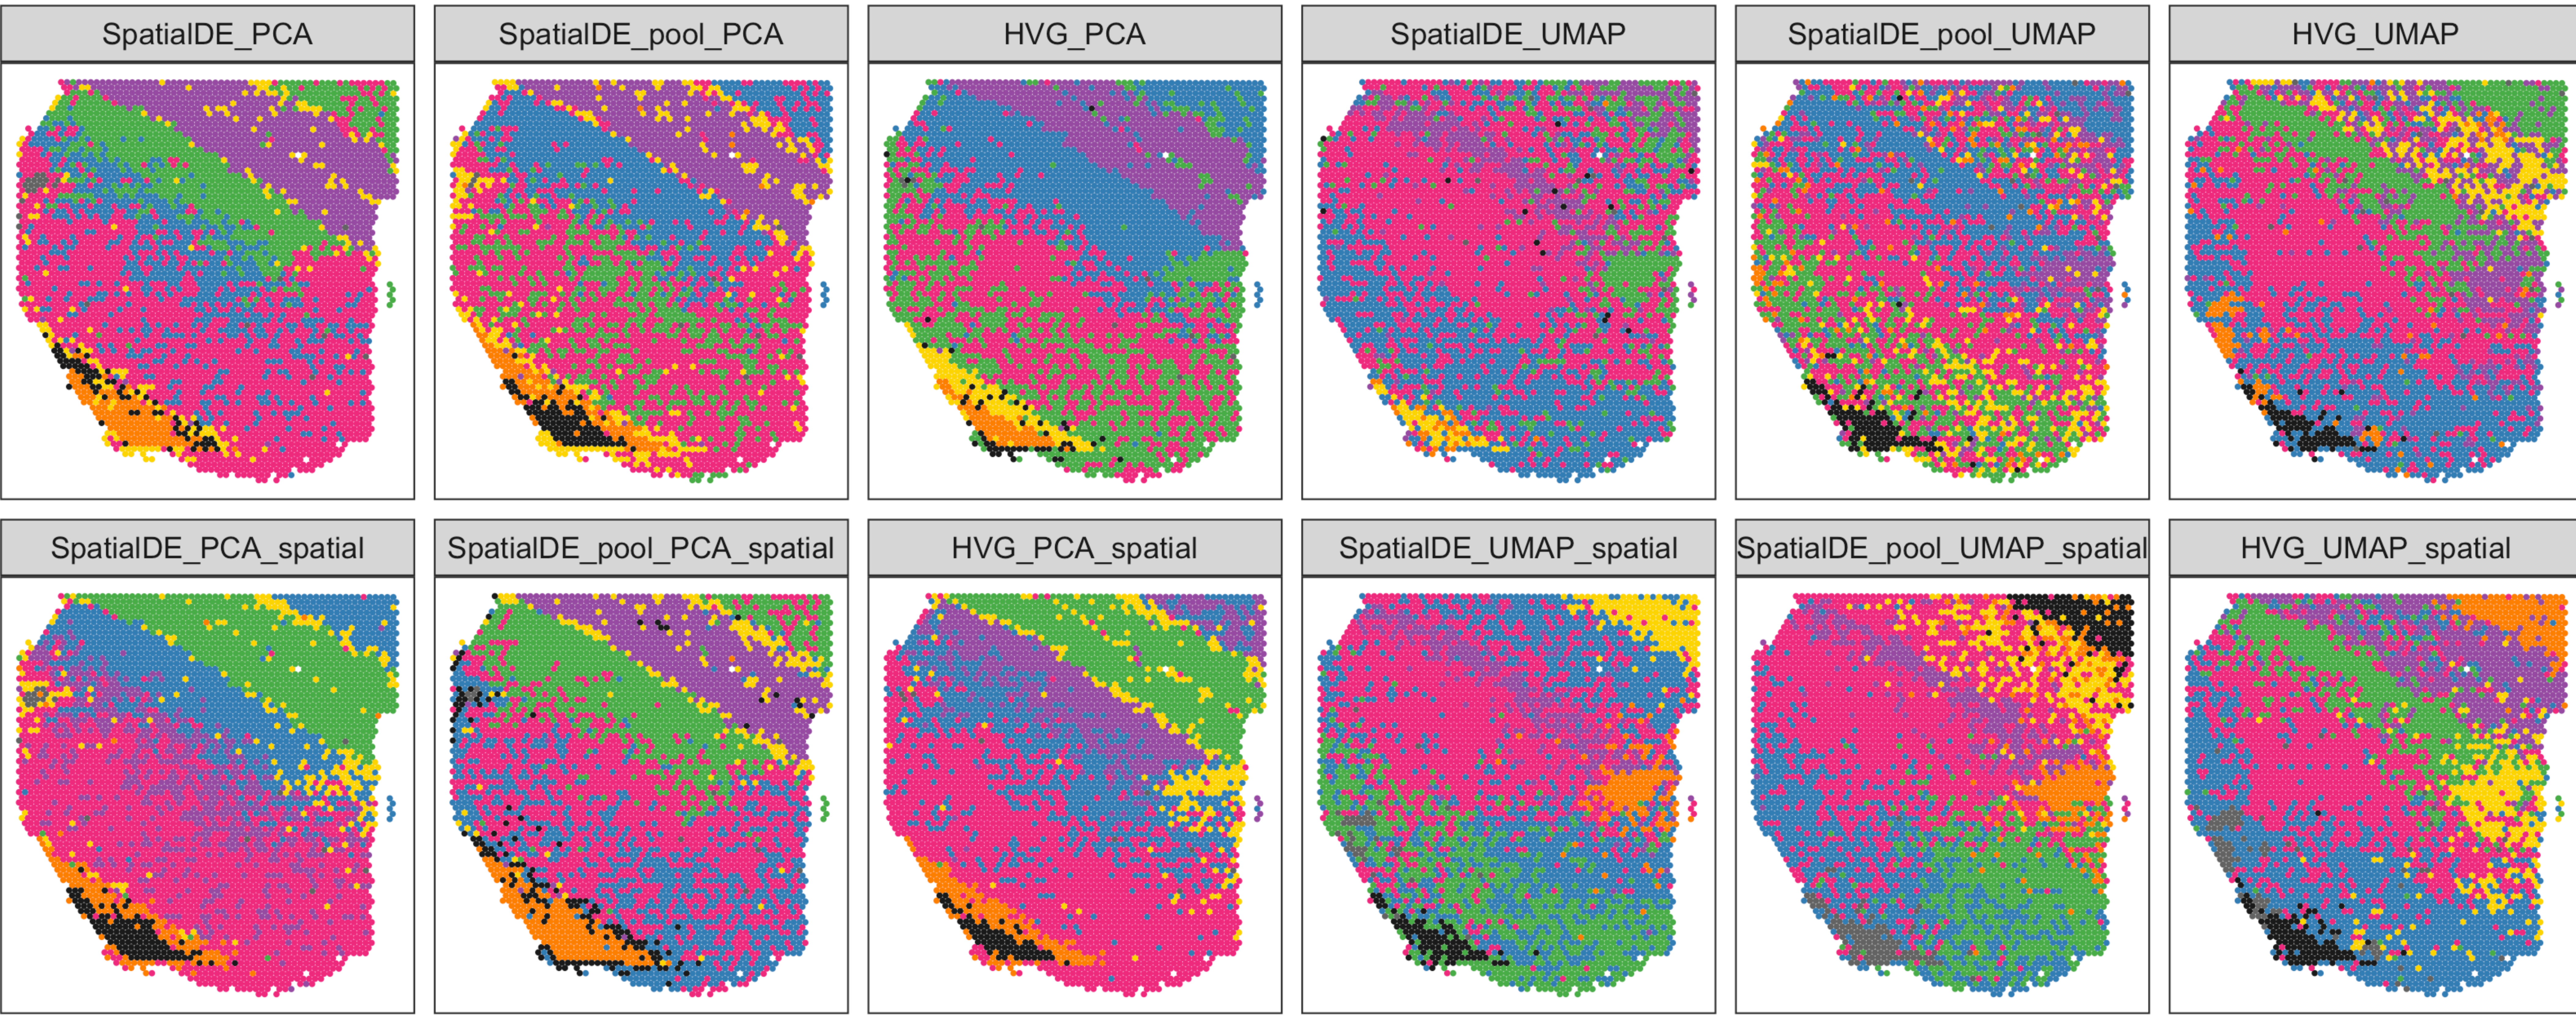



# Sample 151507: Clustering (semi-supervised and markers)

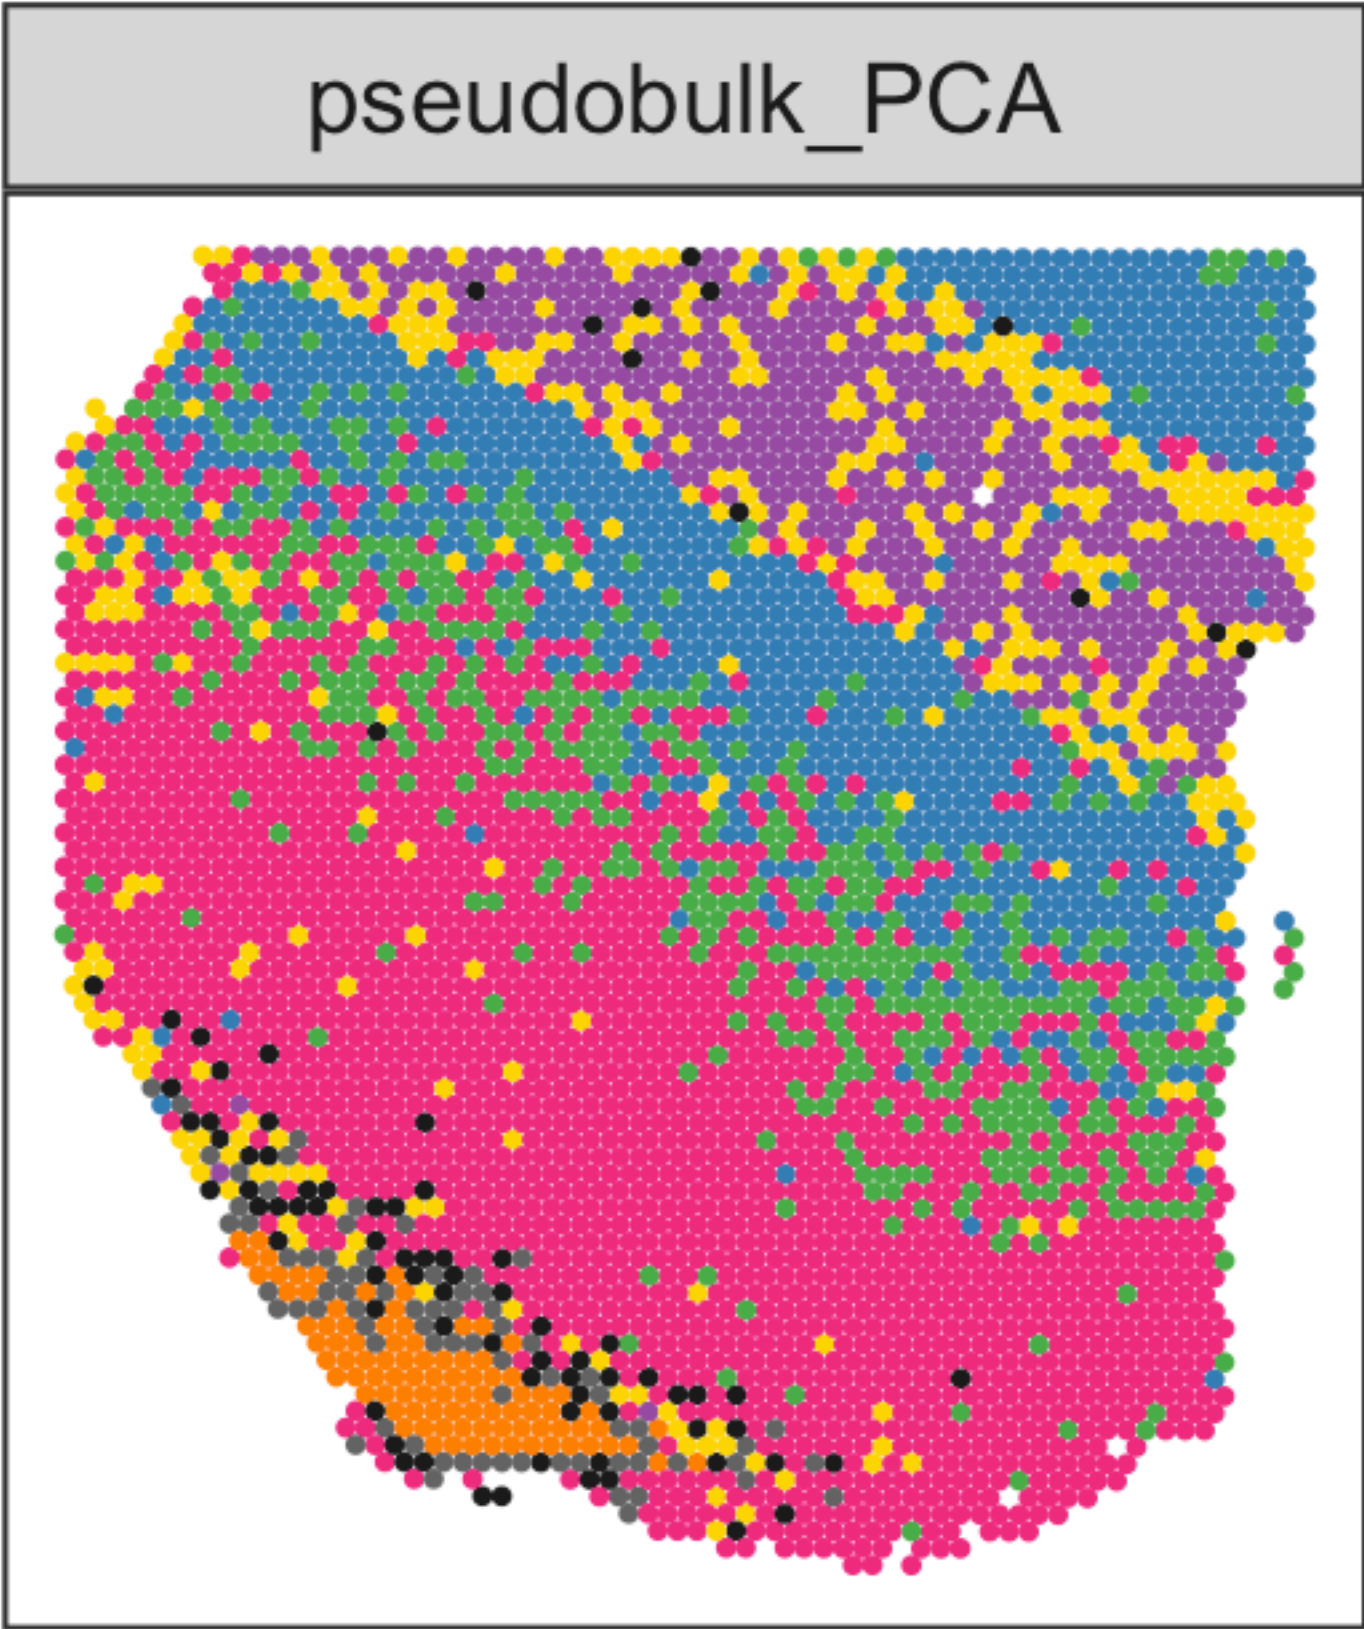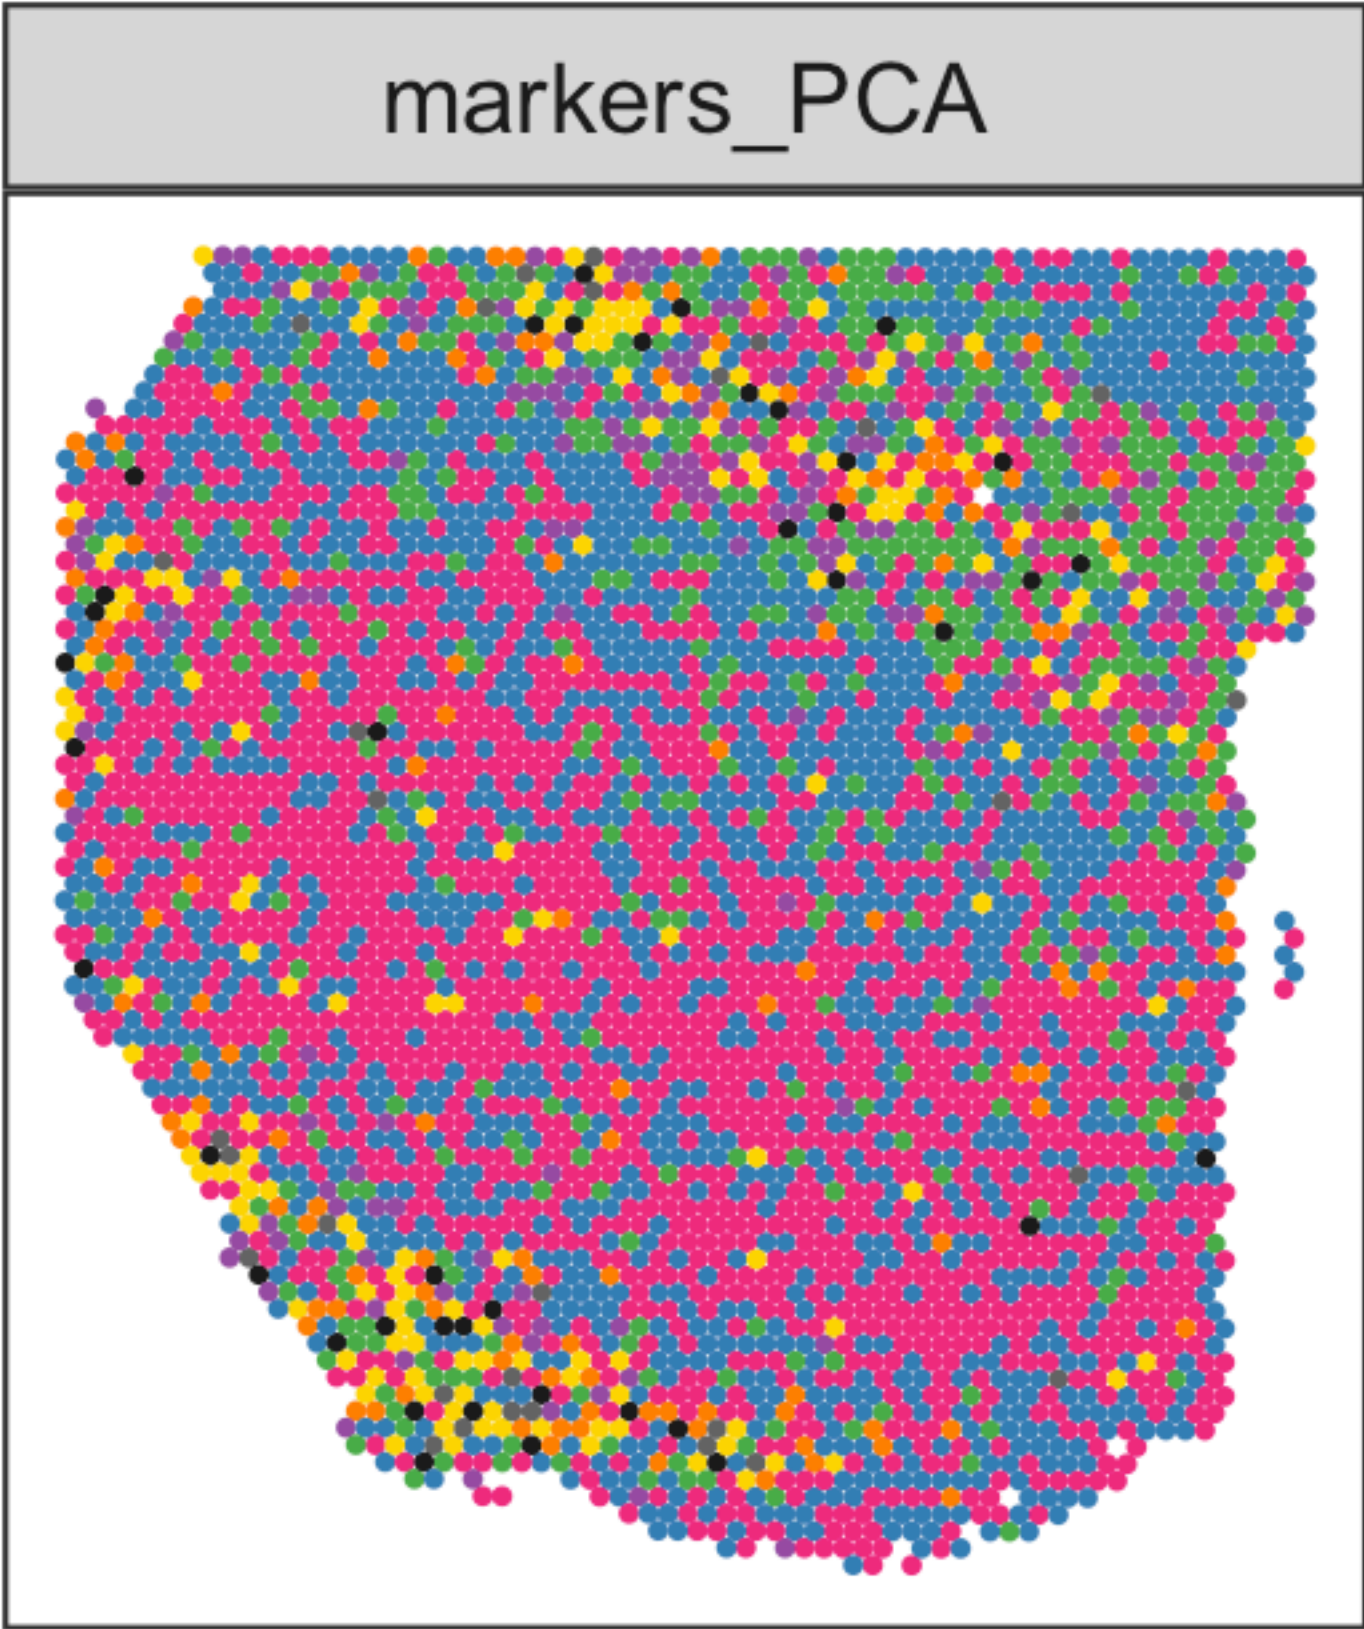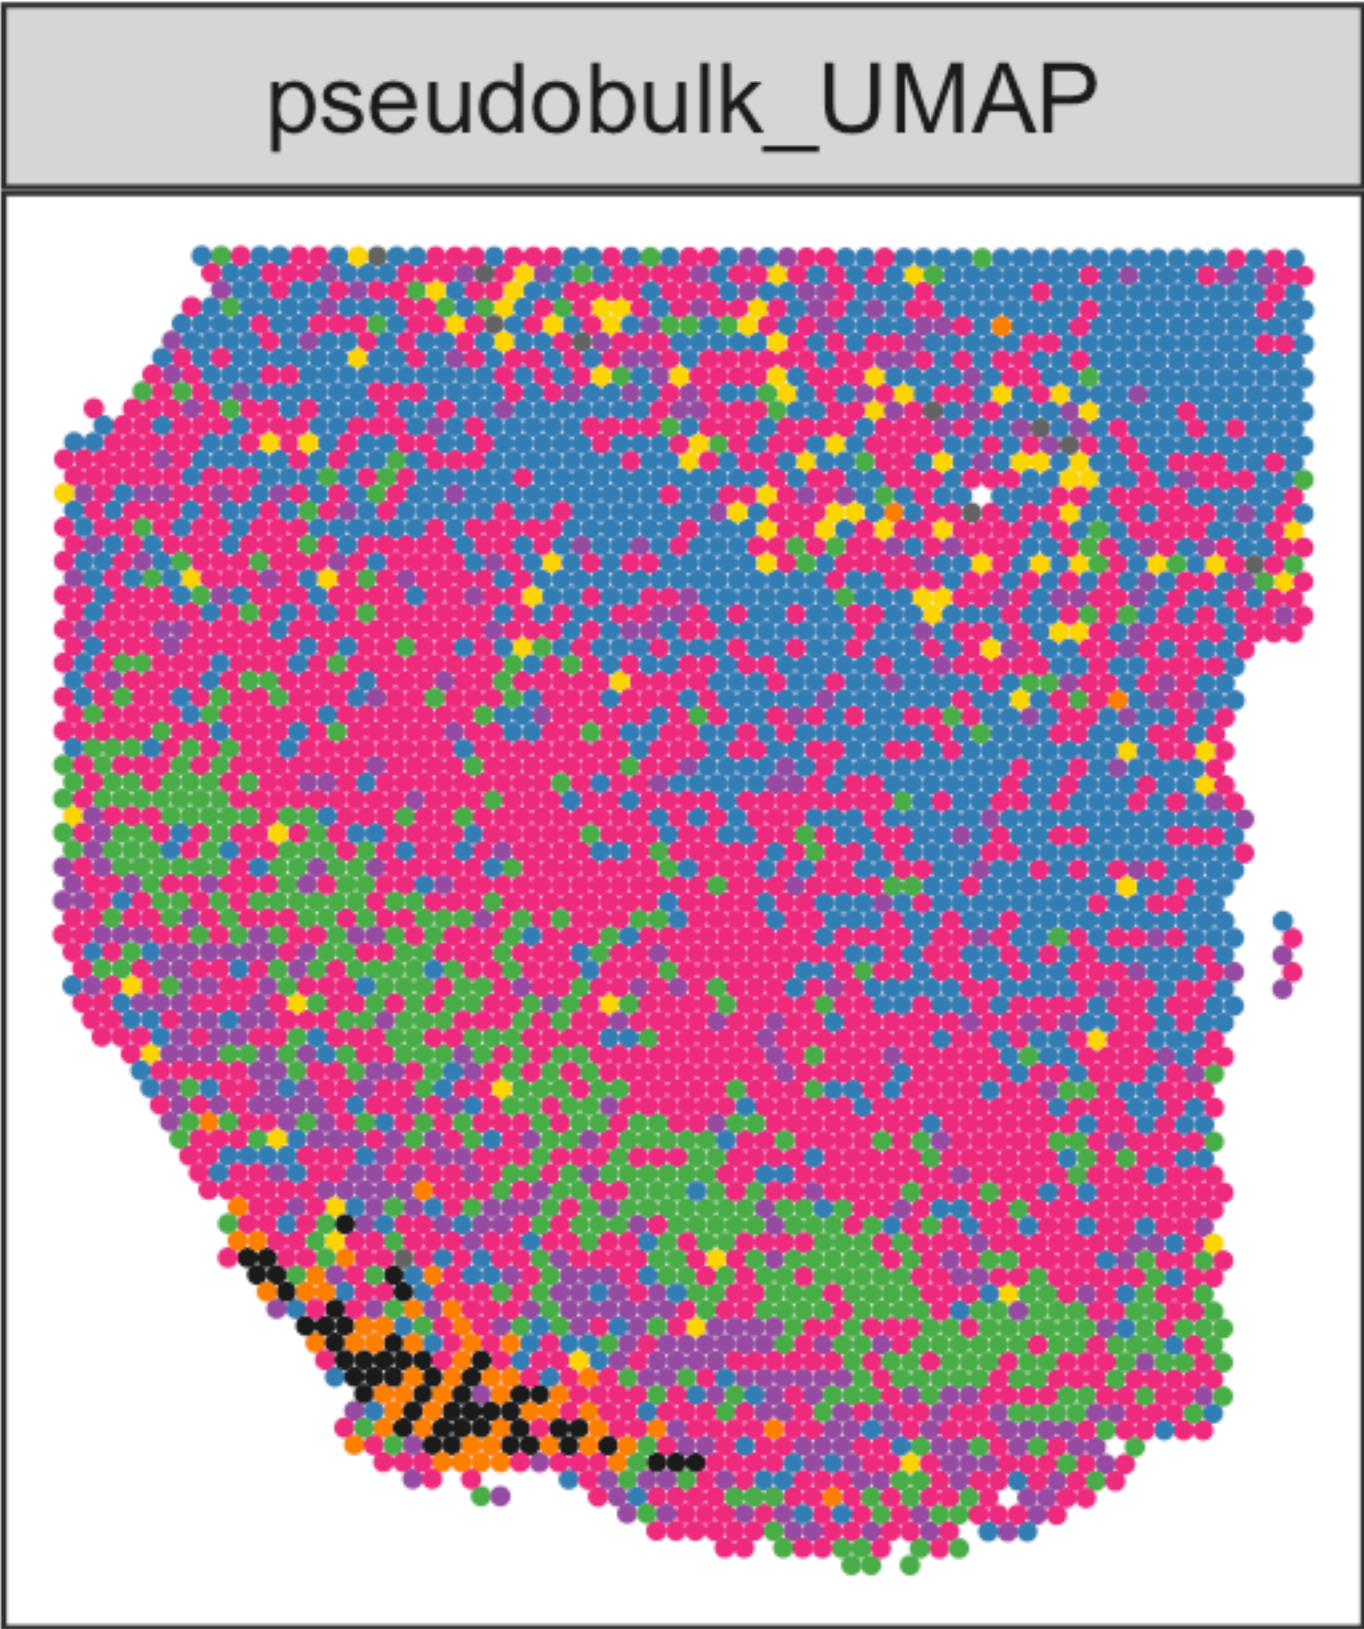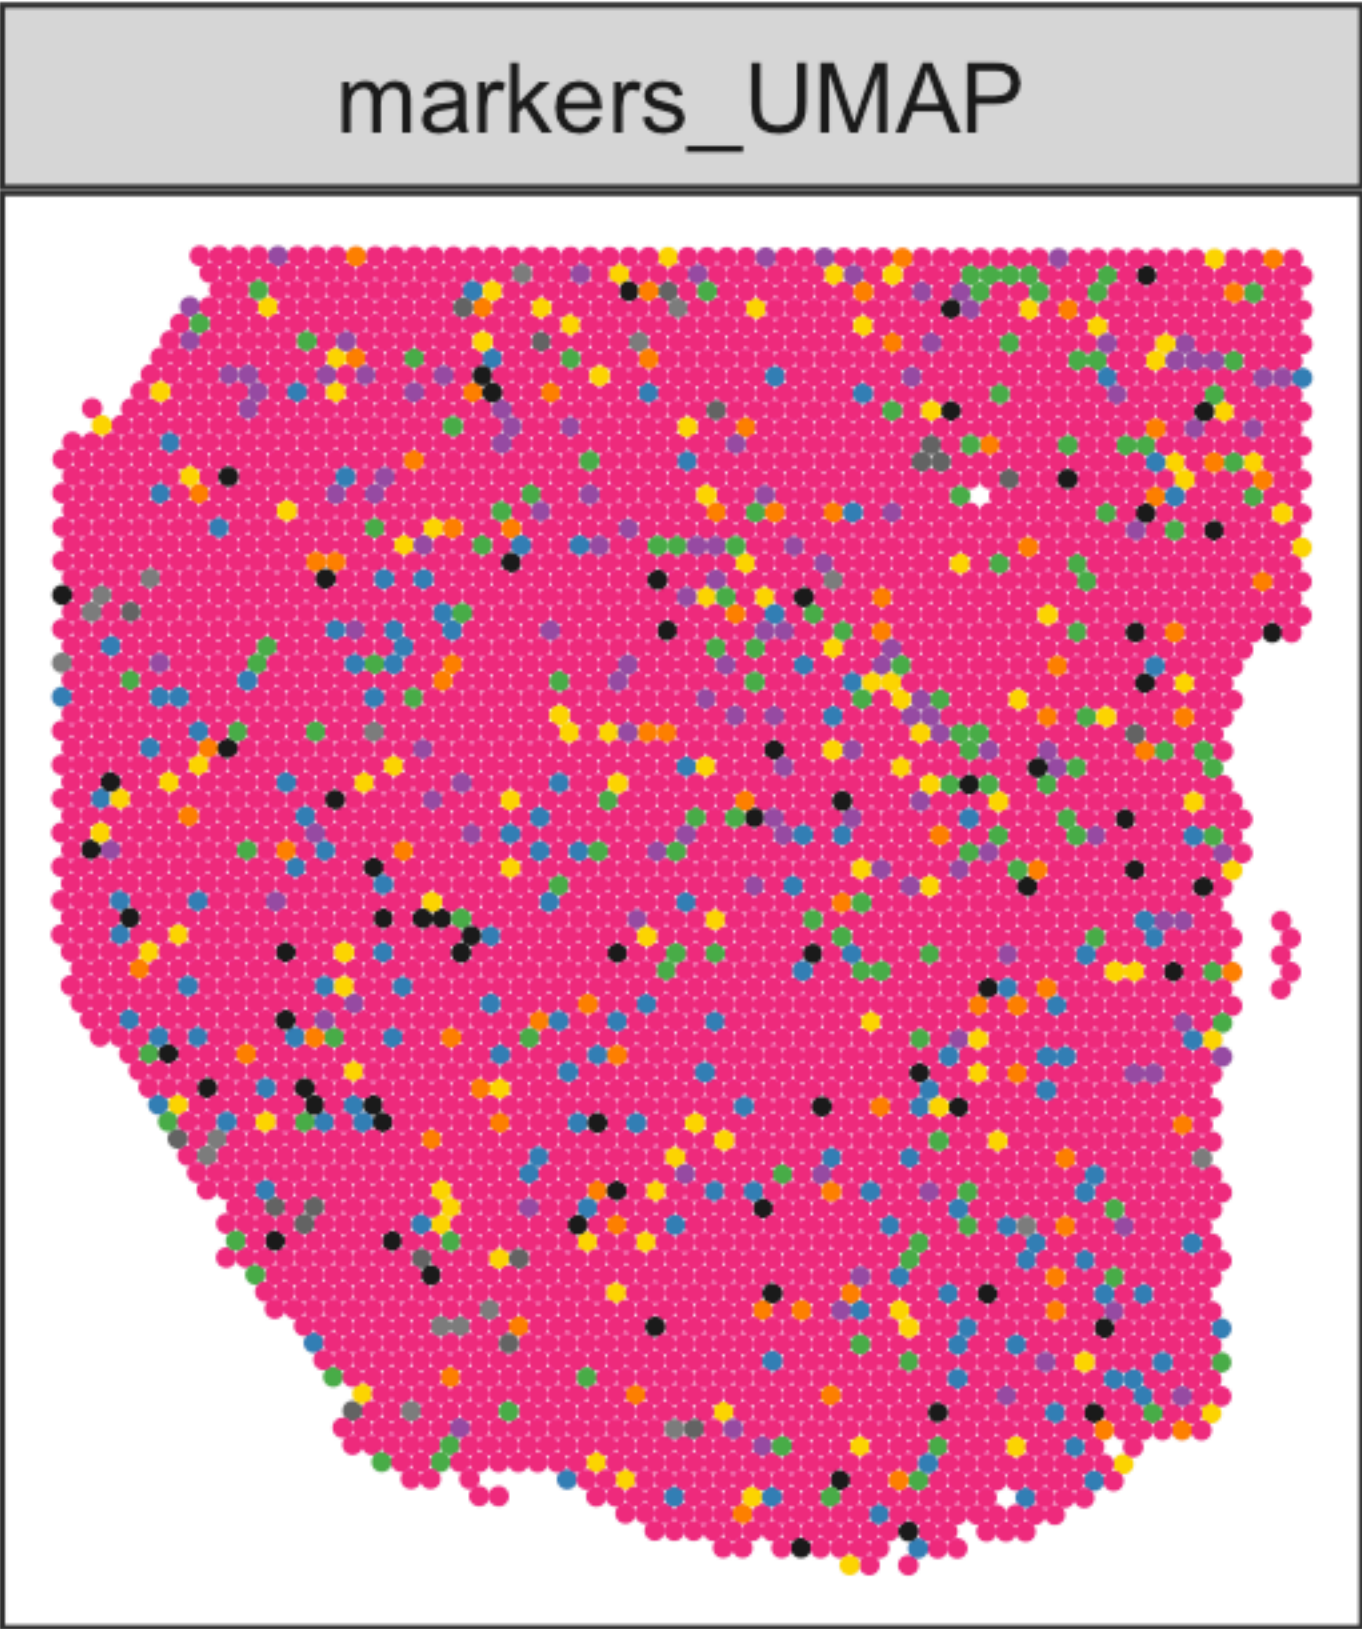

cluster

- 1
- 2
- 3
- 4
- 5
- 6
- 7
- 8
- 9

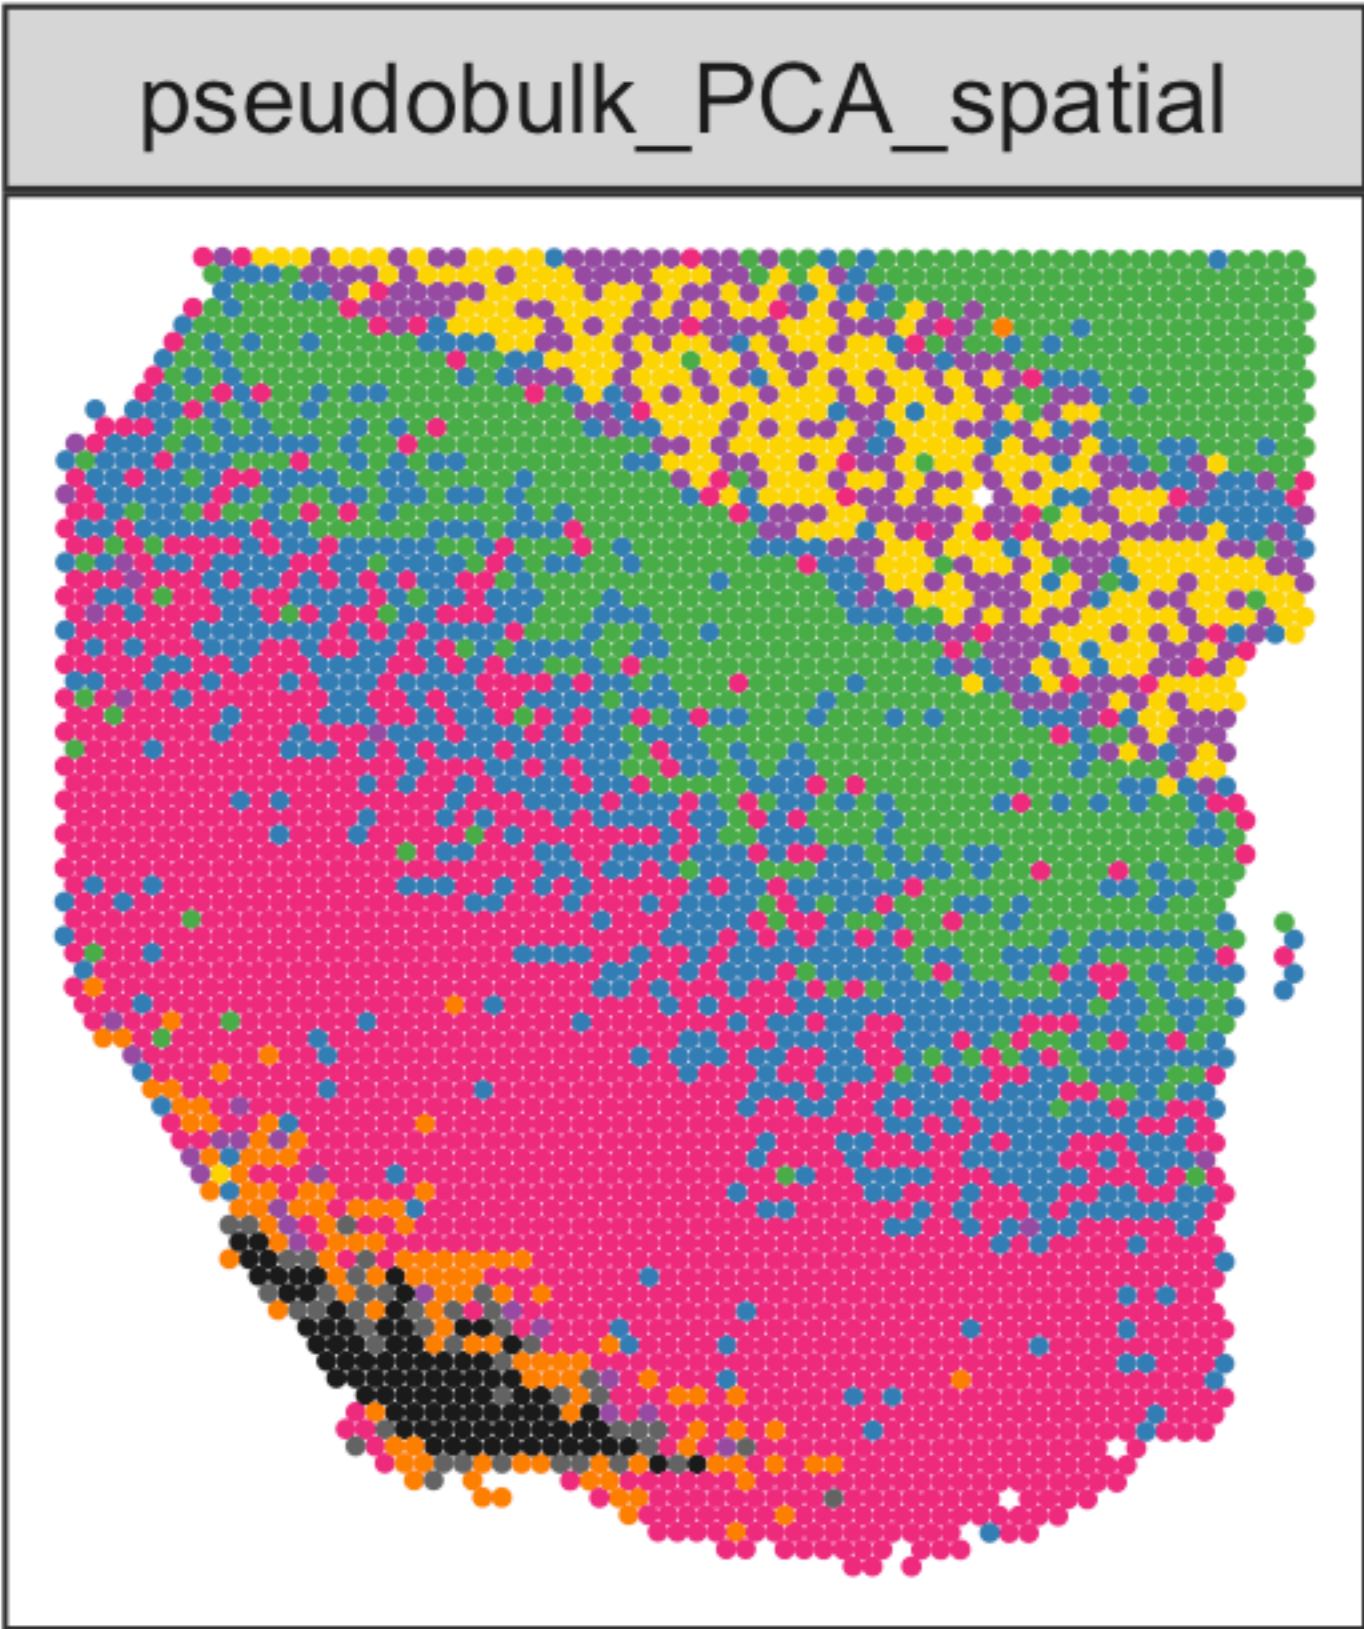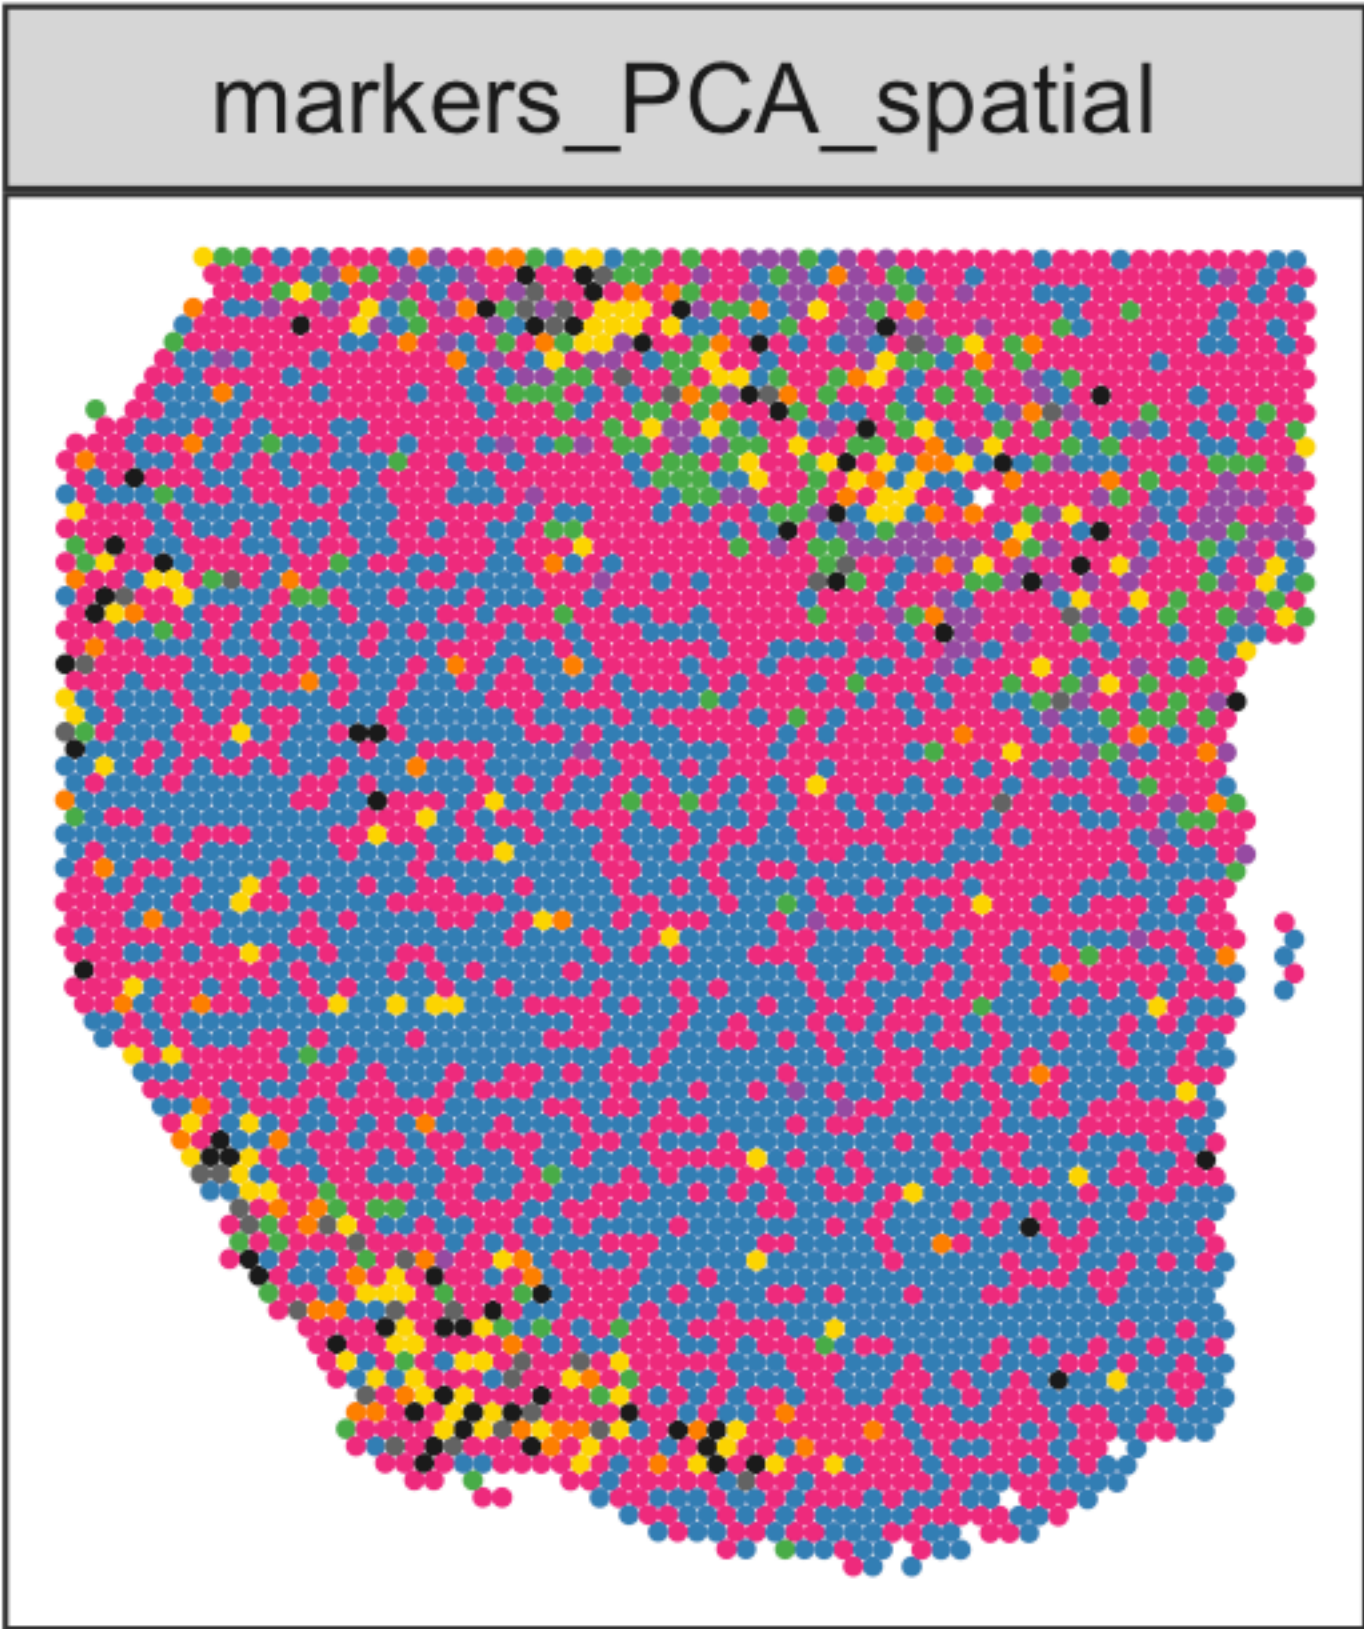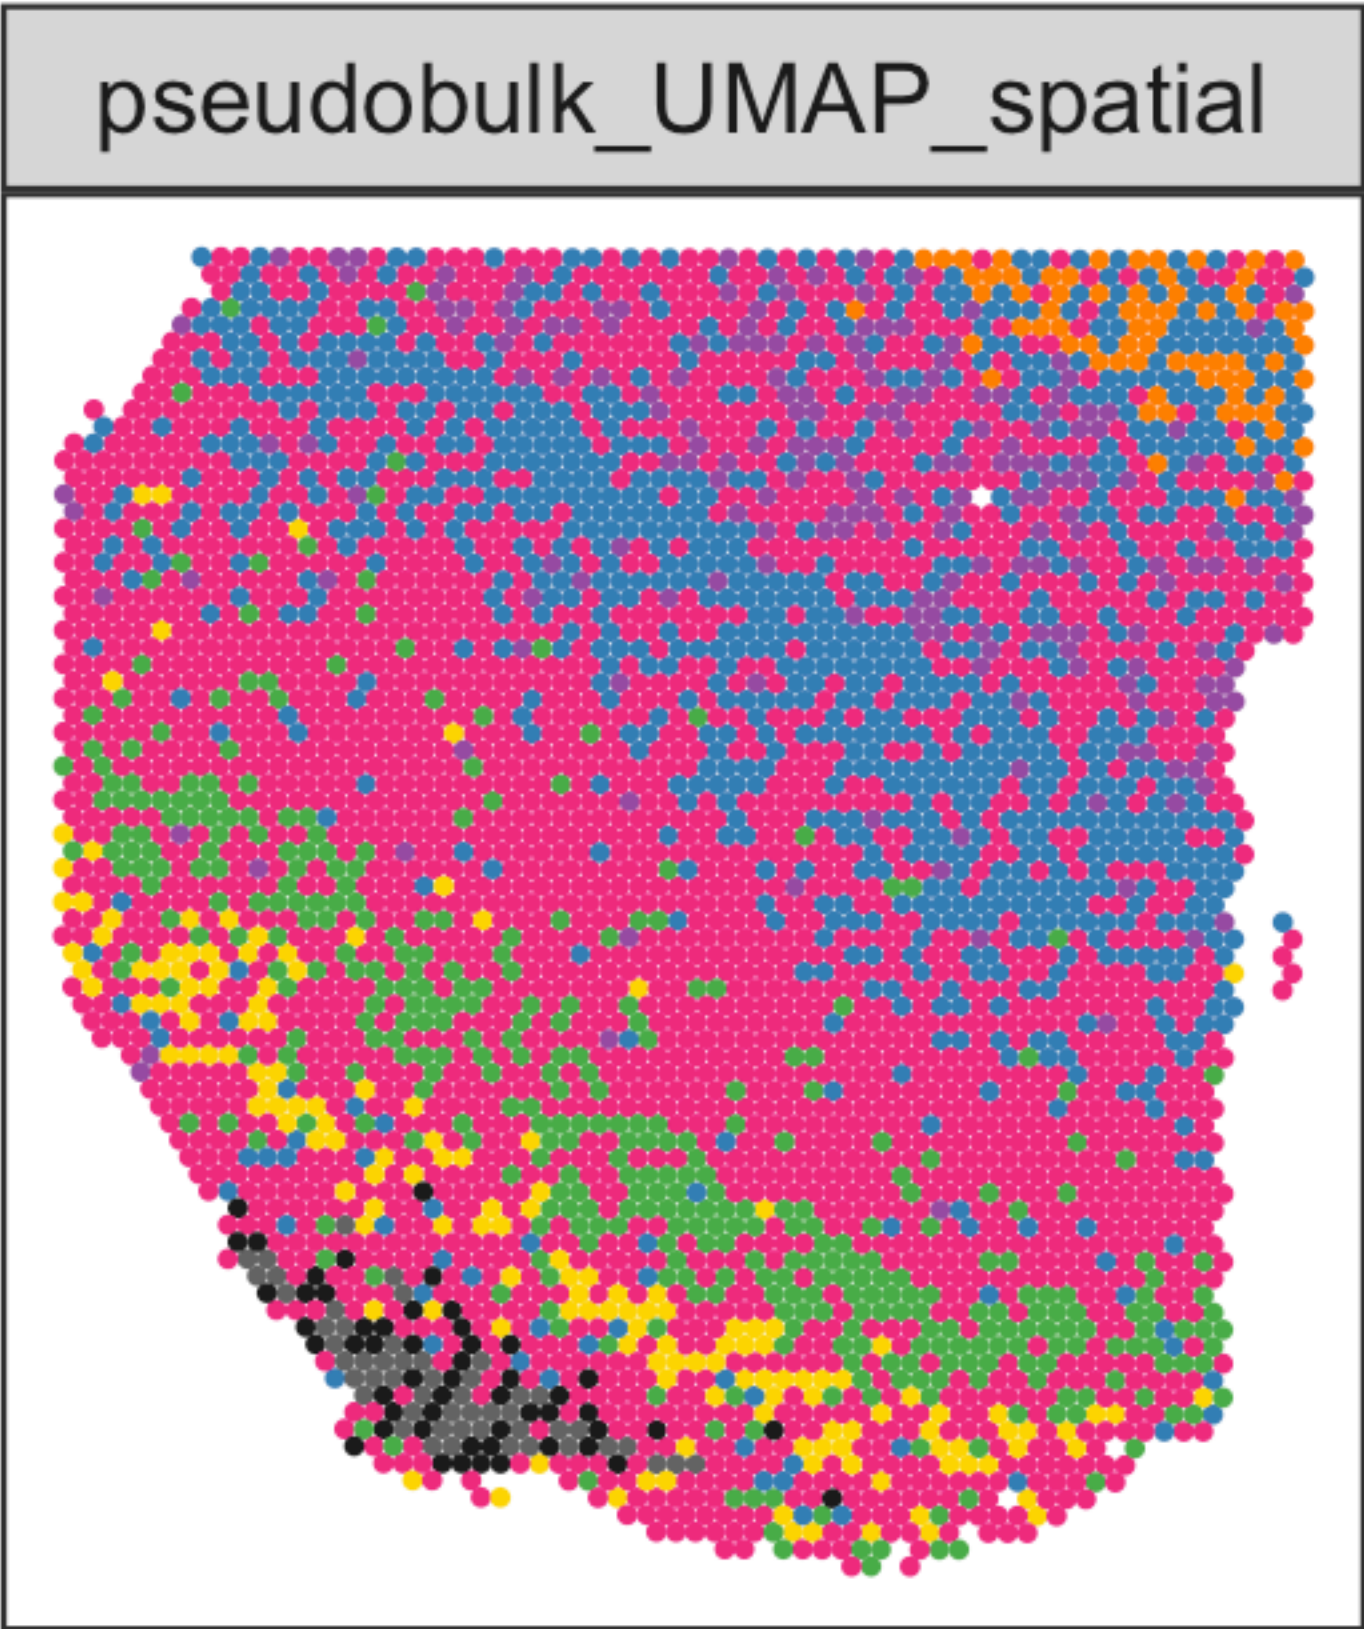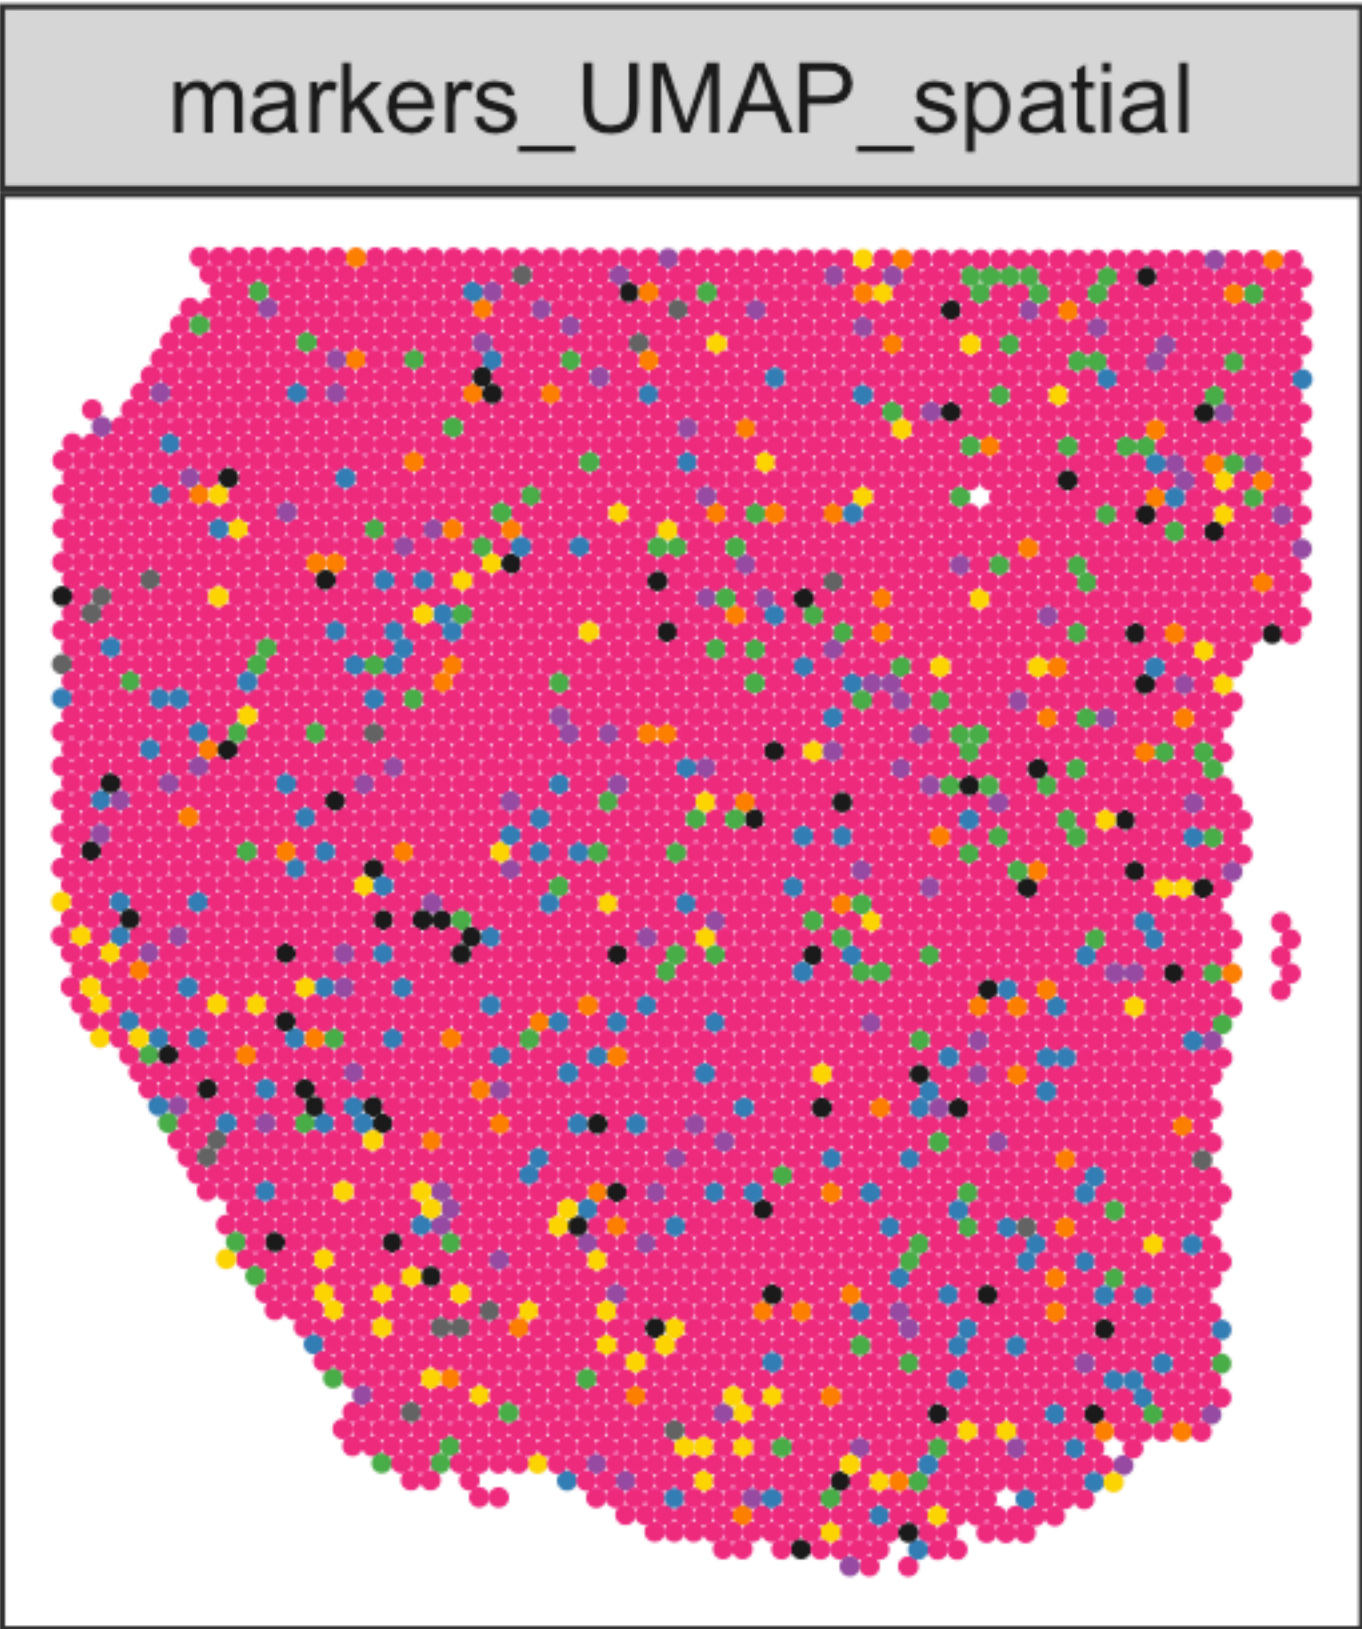



# Sample 151508: Clustering (unsupervised)

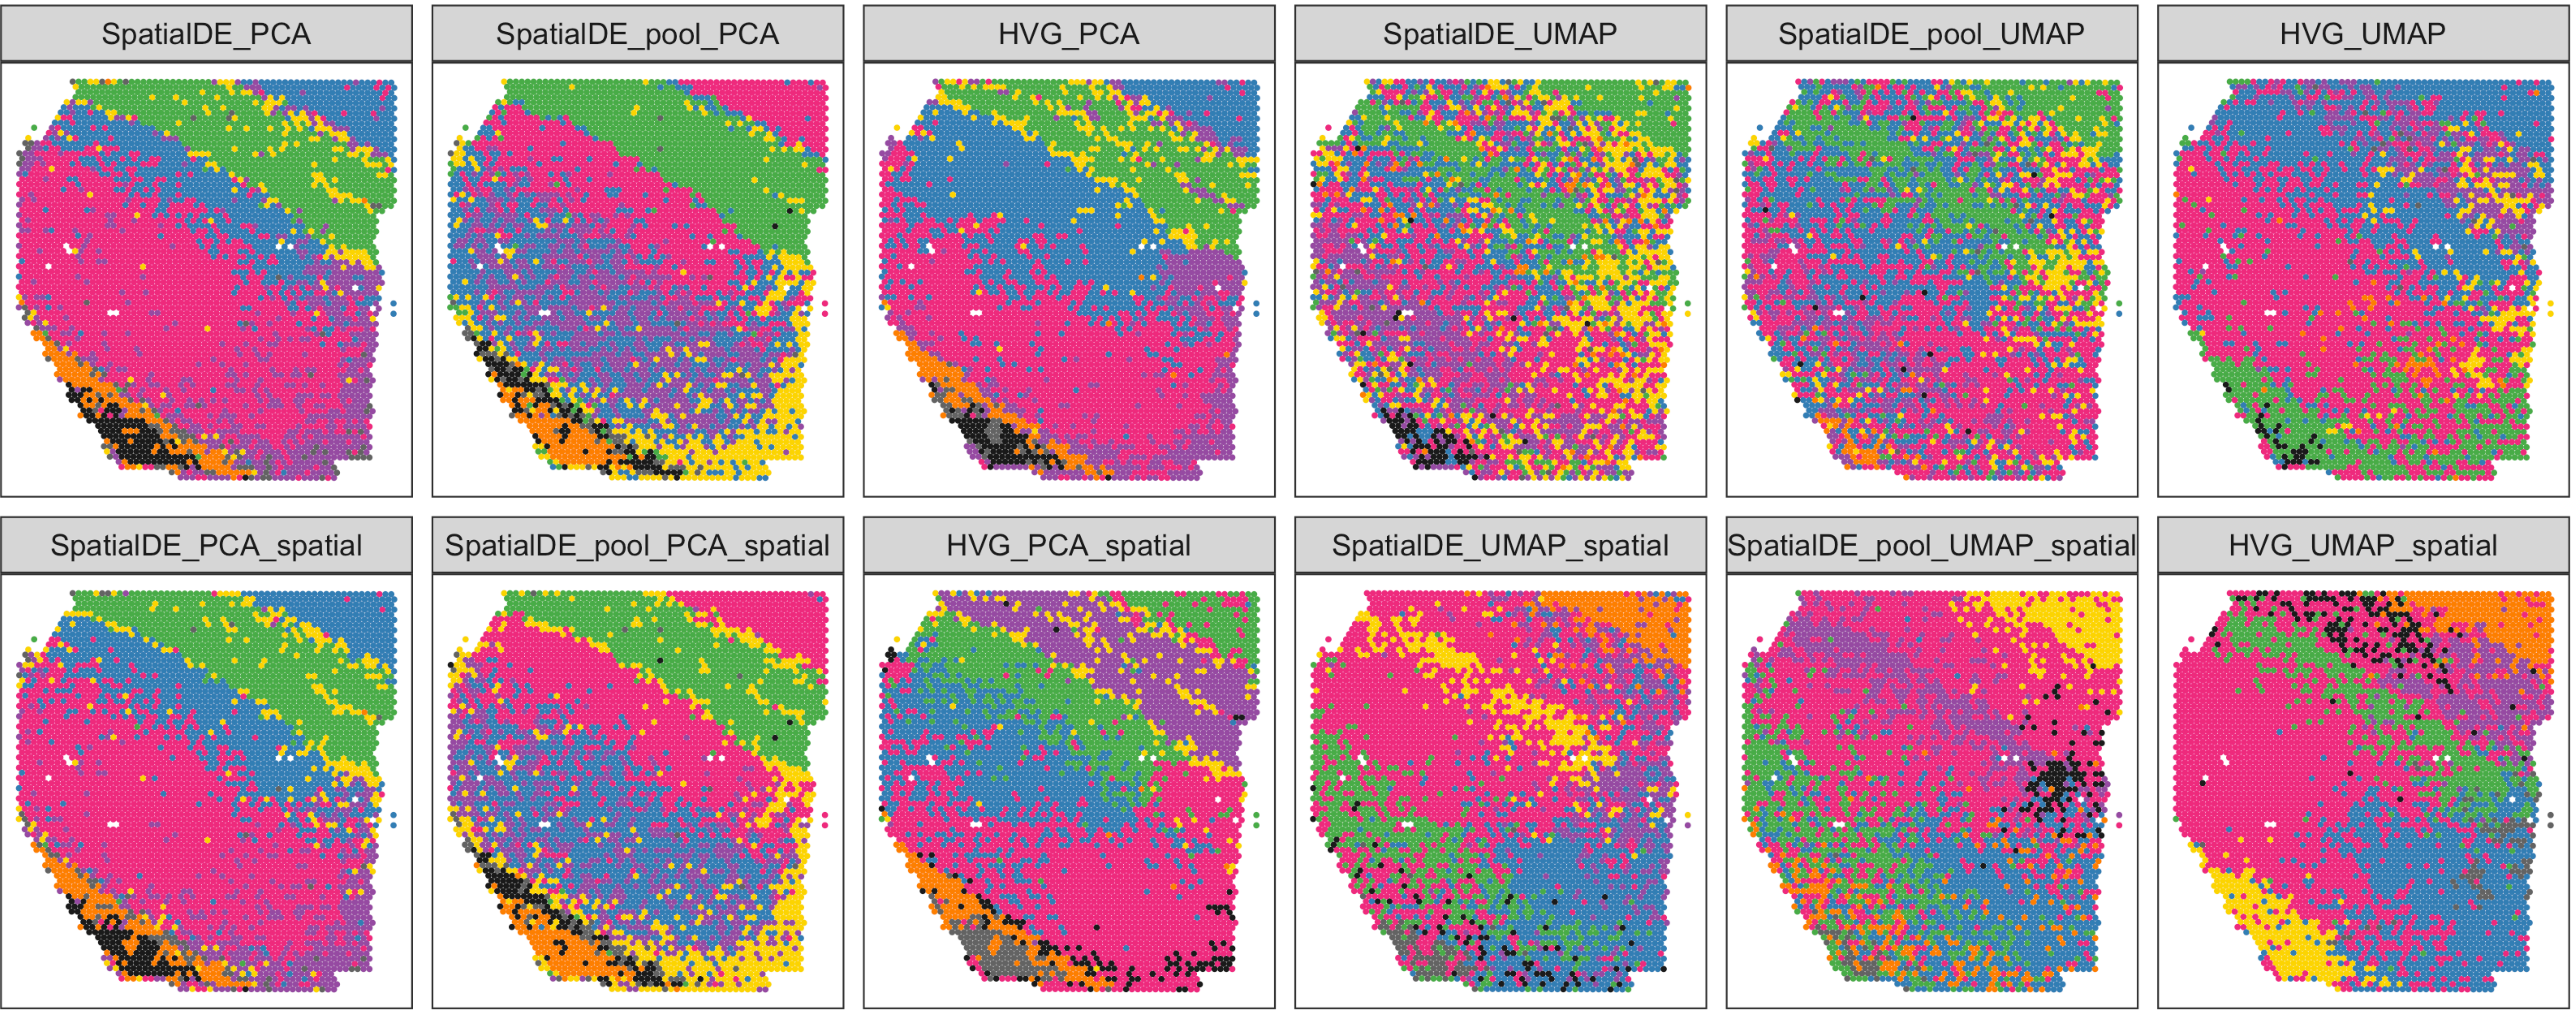

- cluster
- 1
  - 2
  - 3
  - 4
  - 5
  - 6
  - 7
  - 8



# Sample 151508: Clustering (semi-supervised and markers)

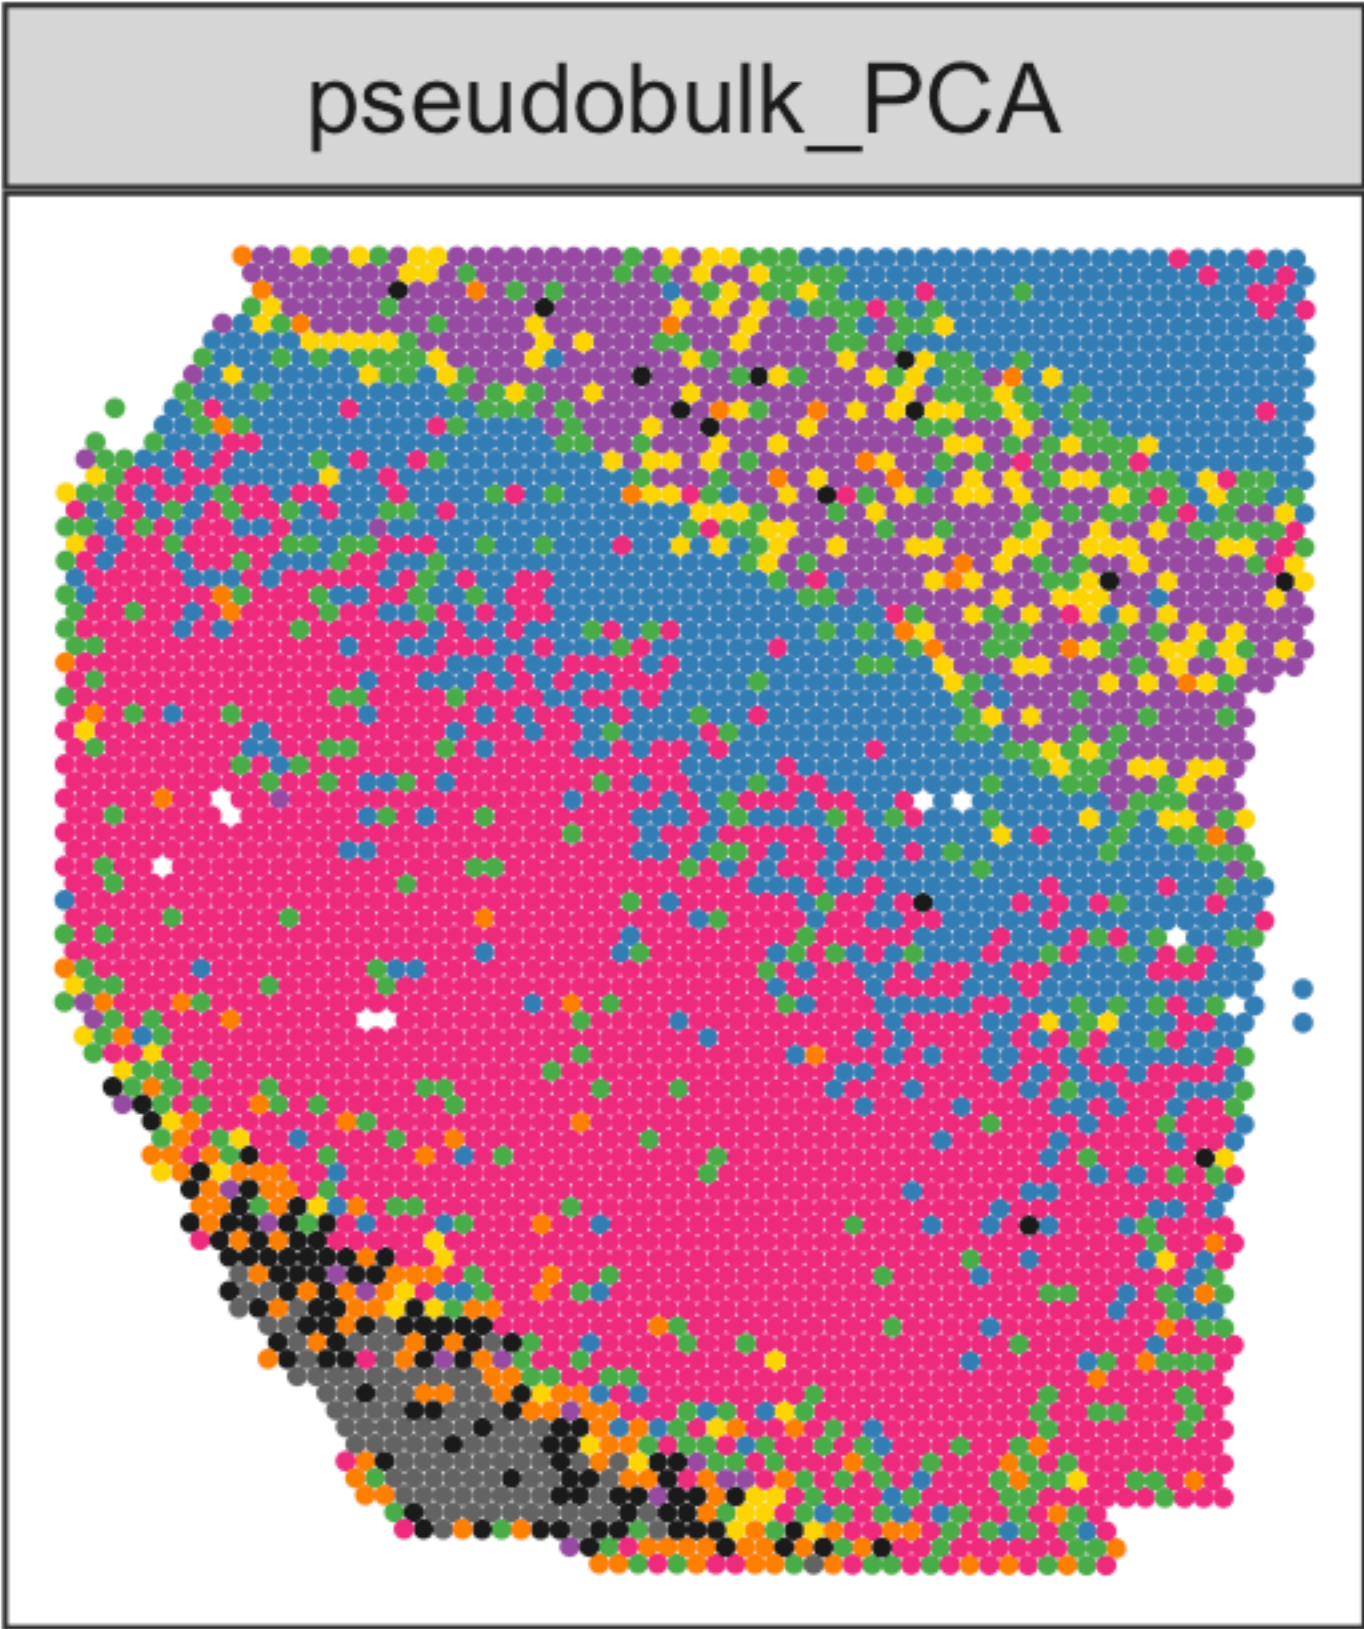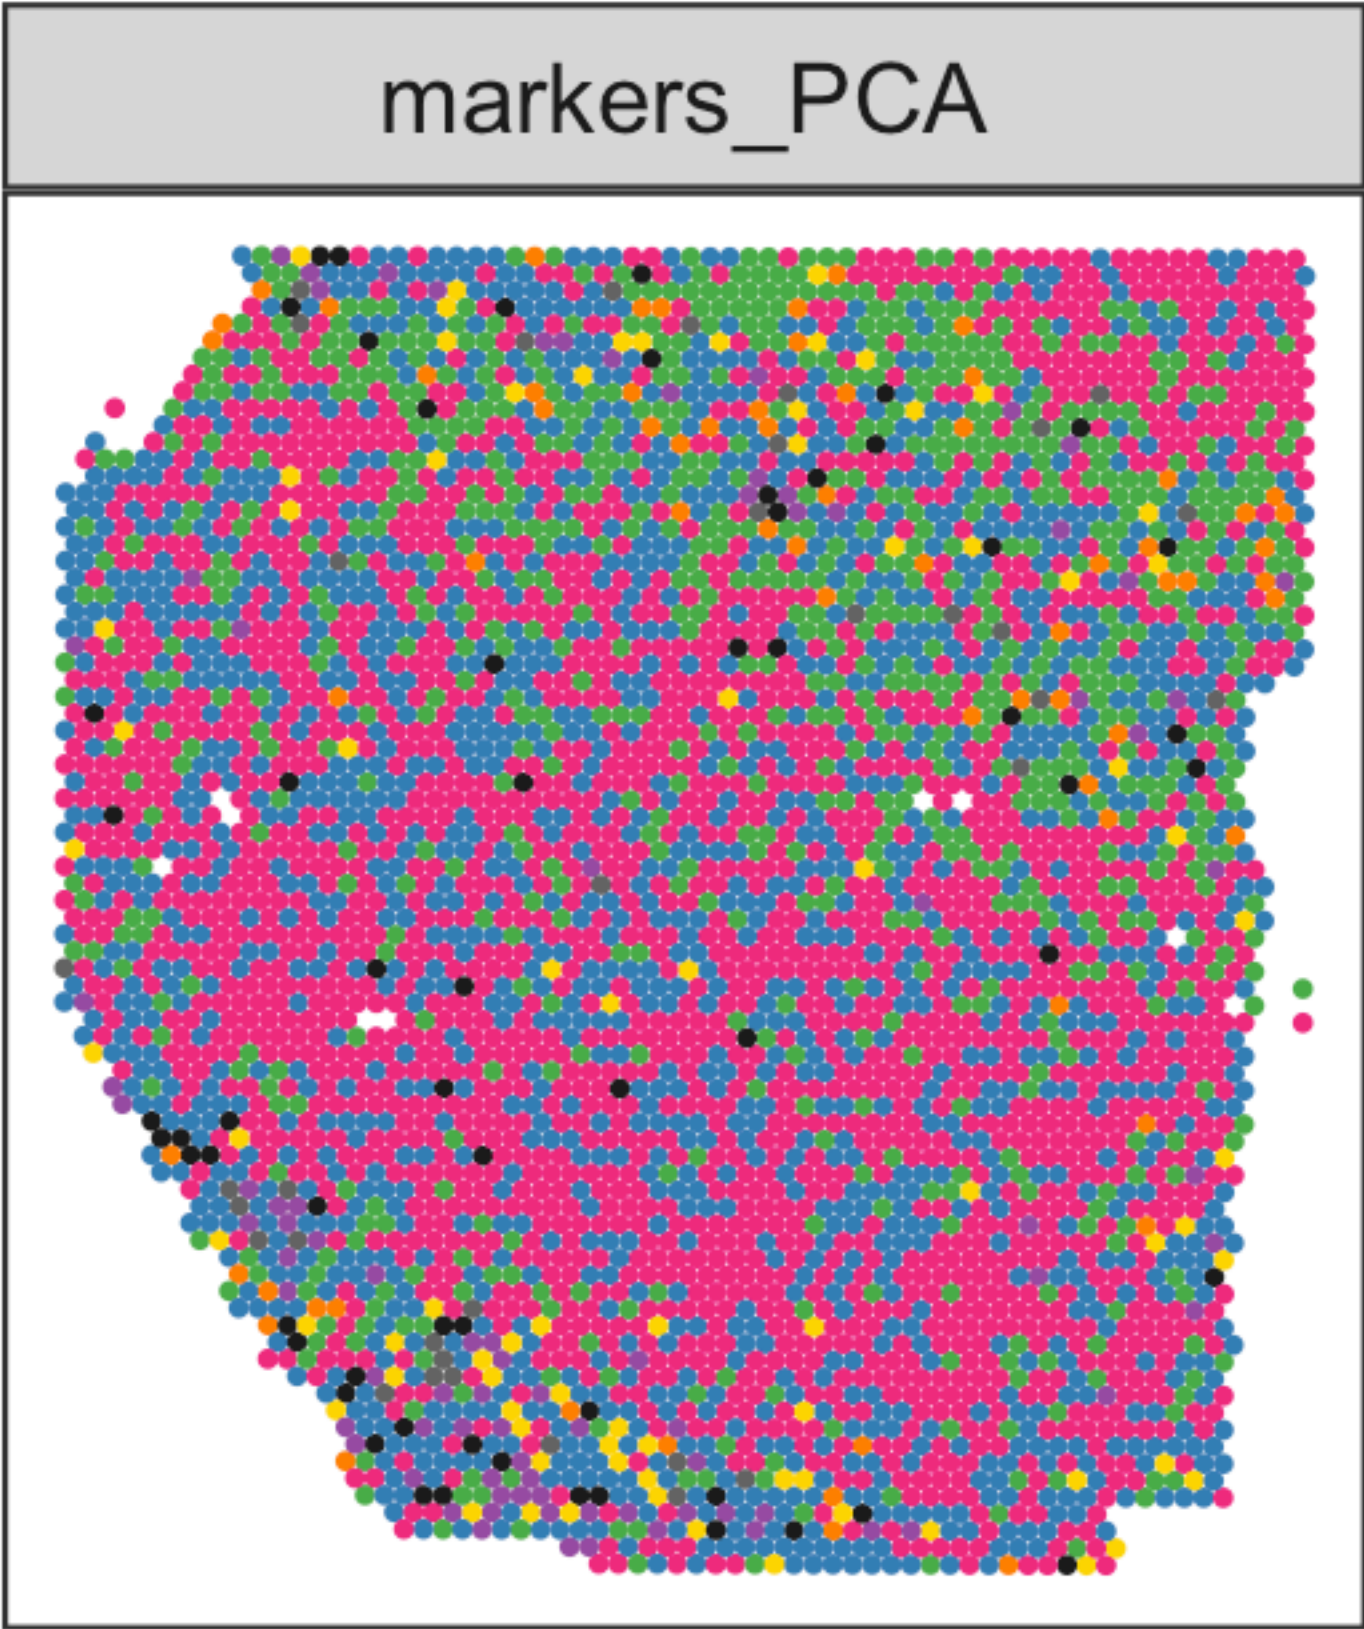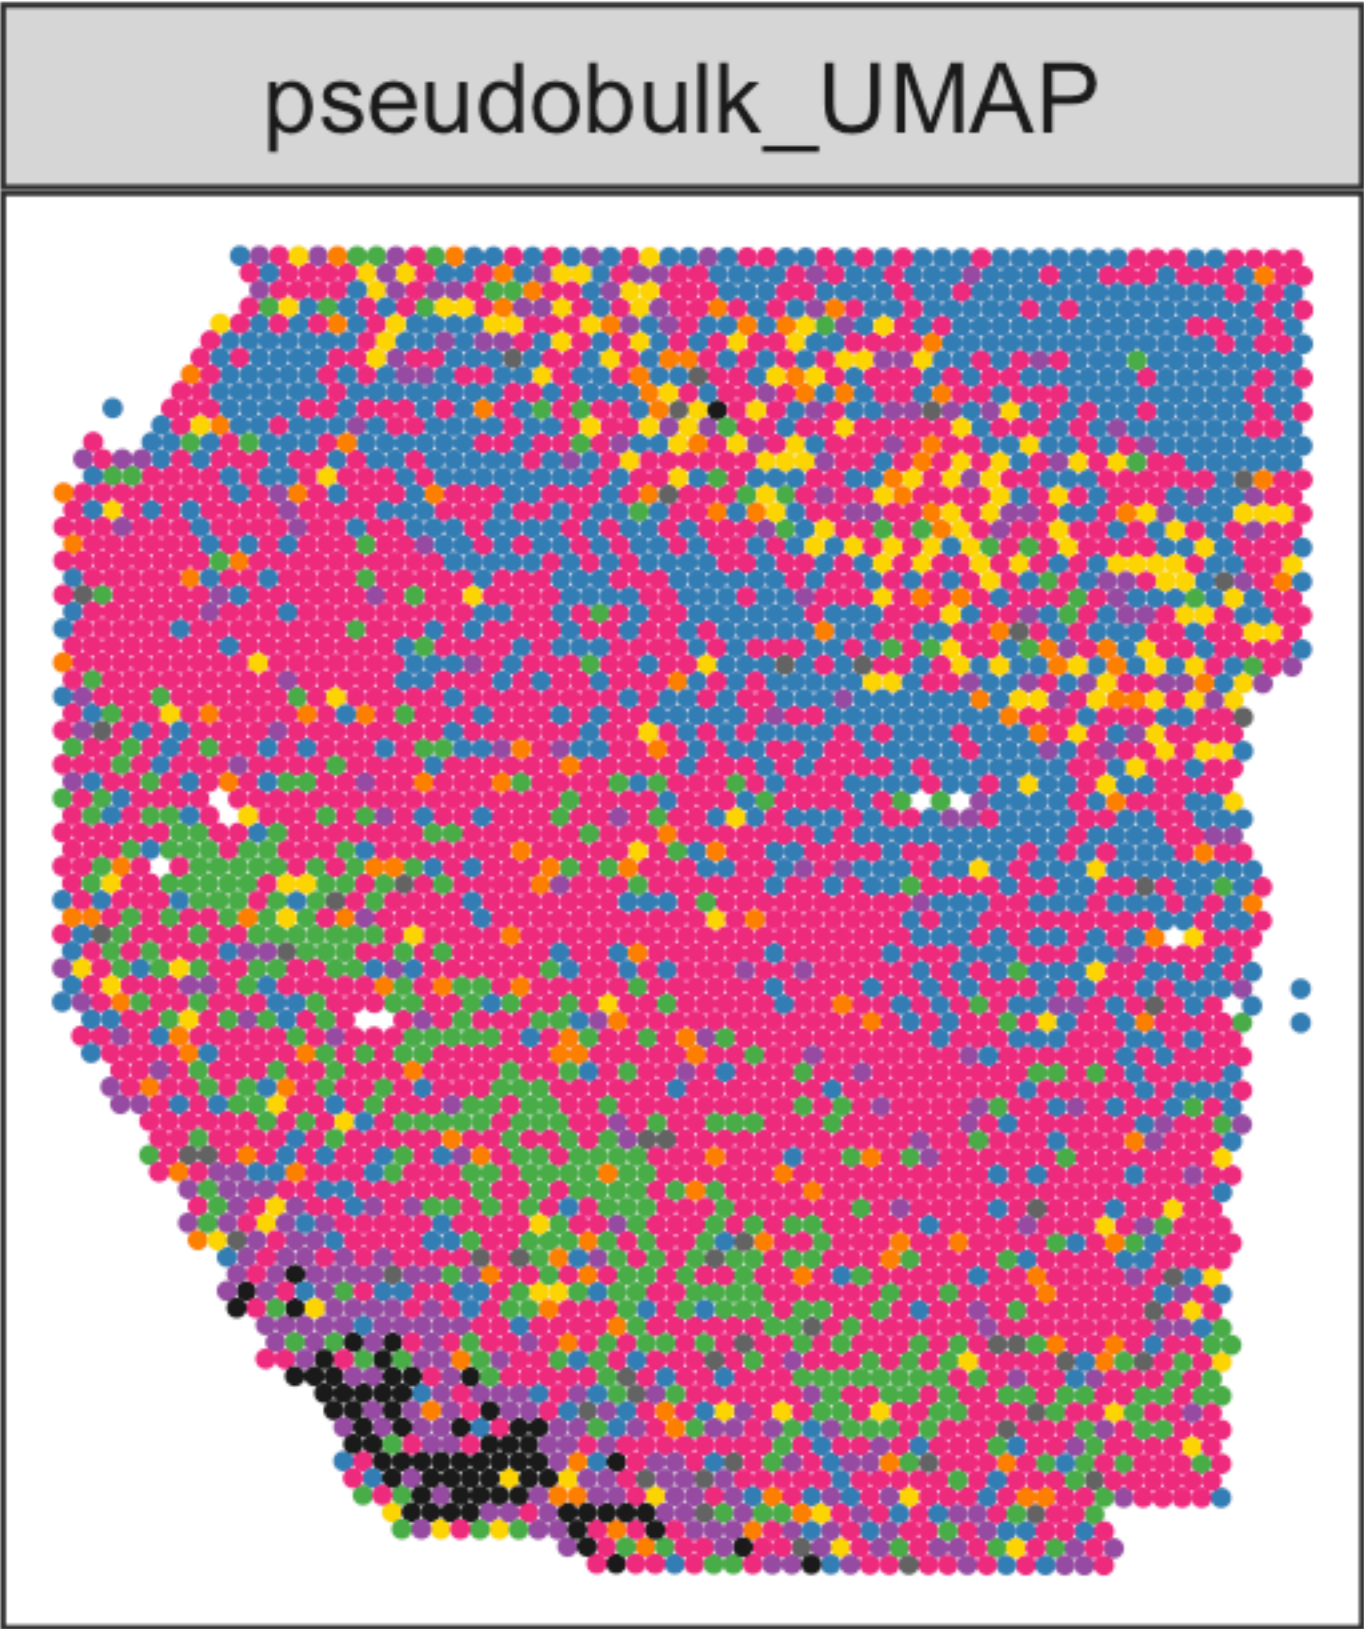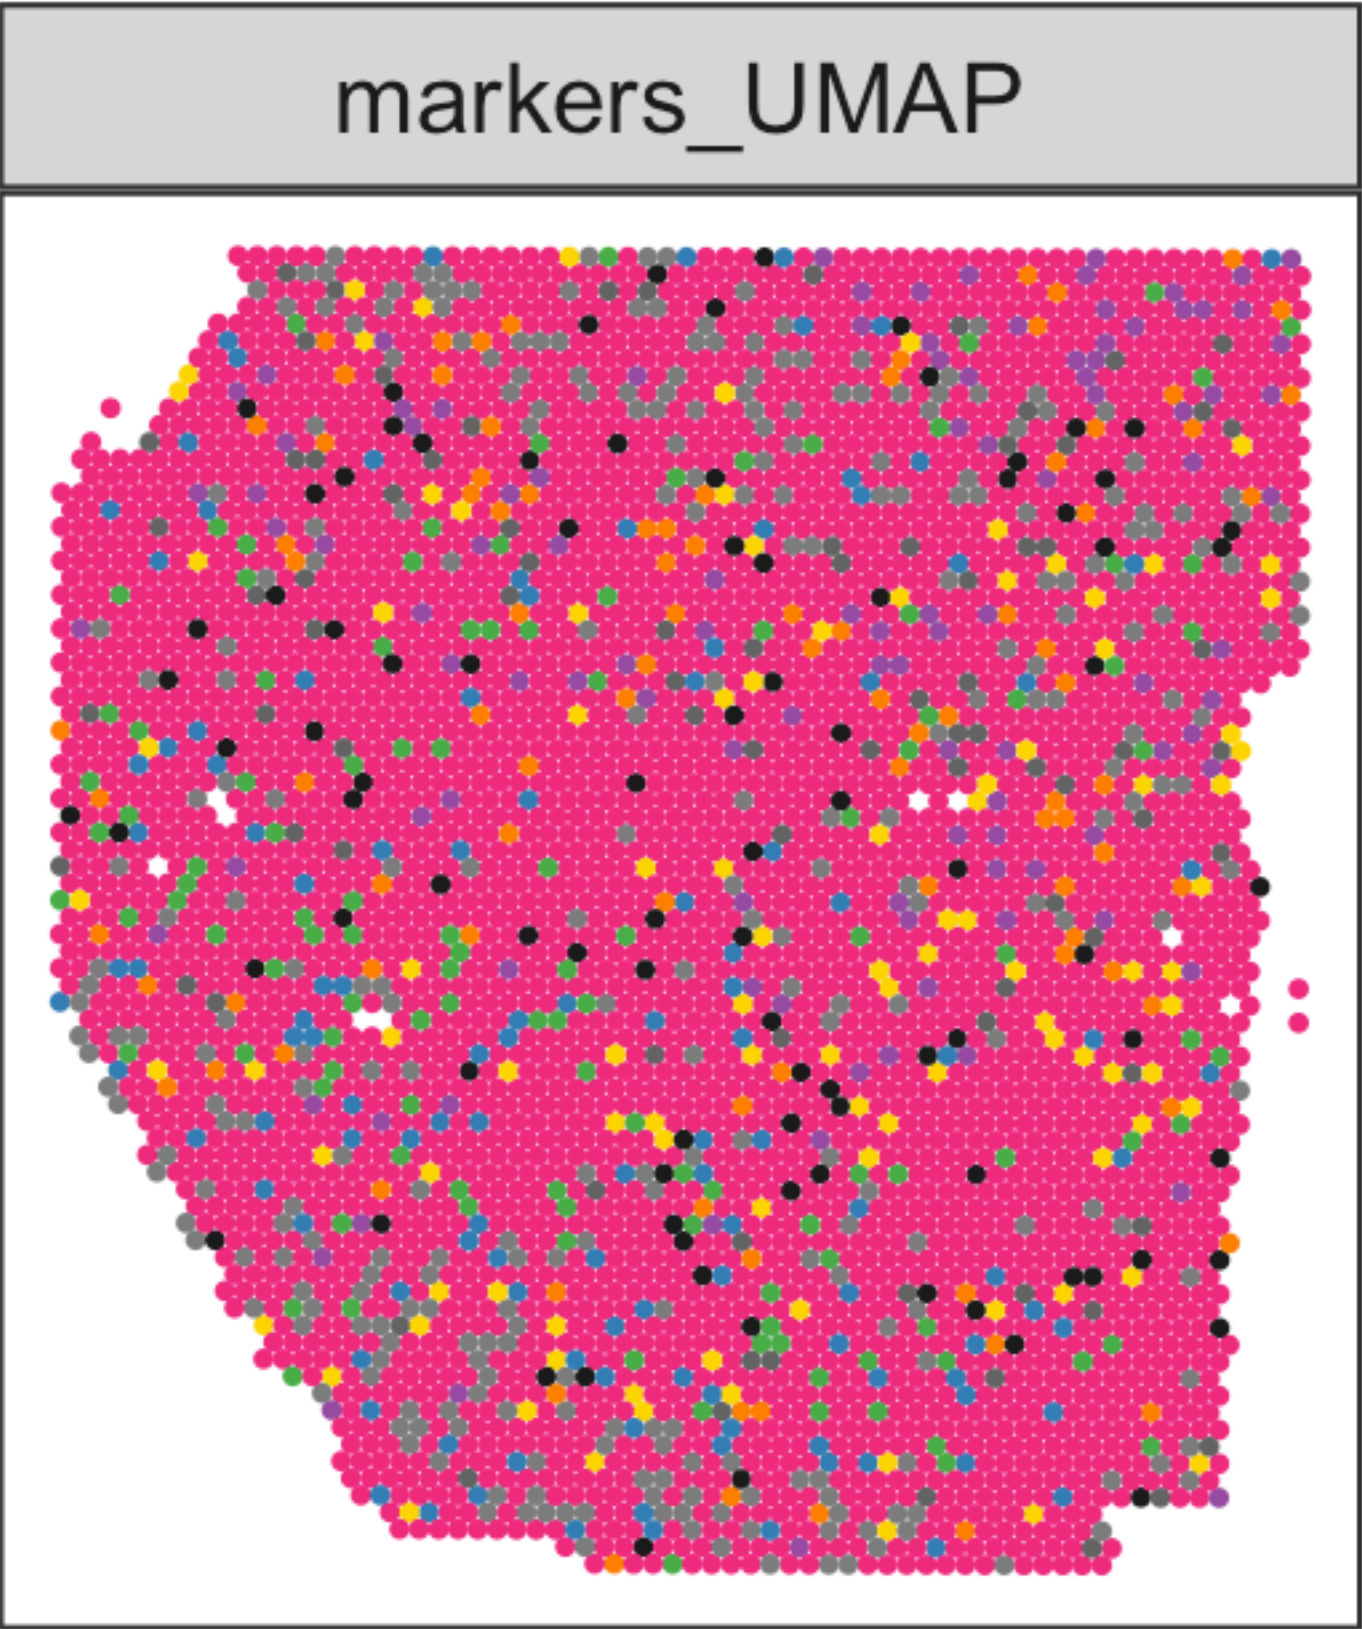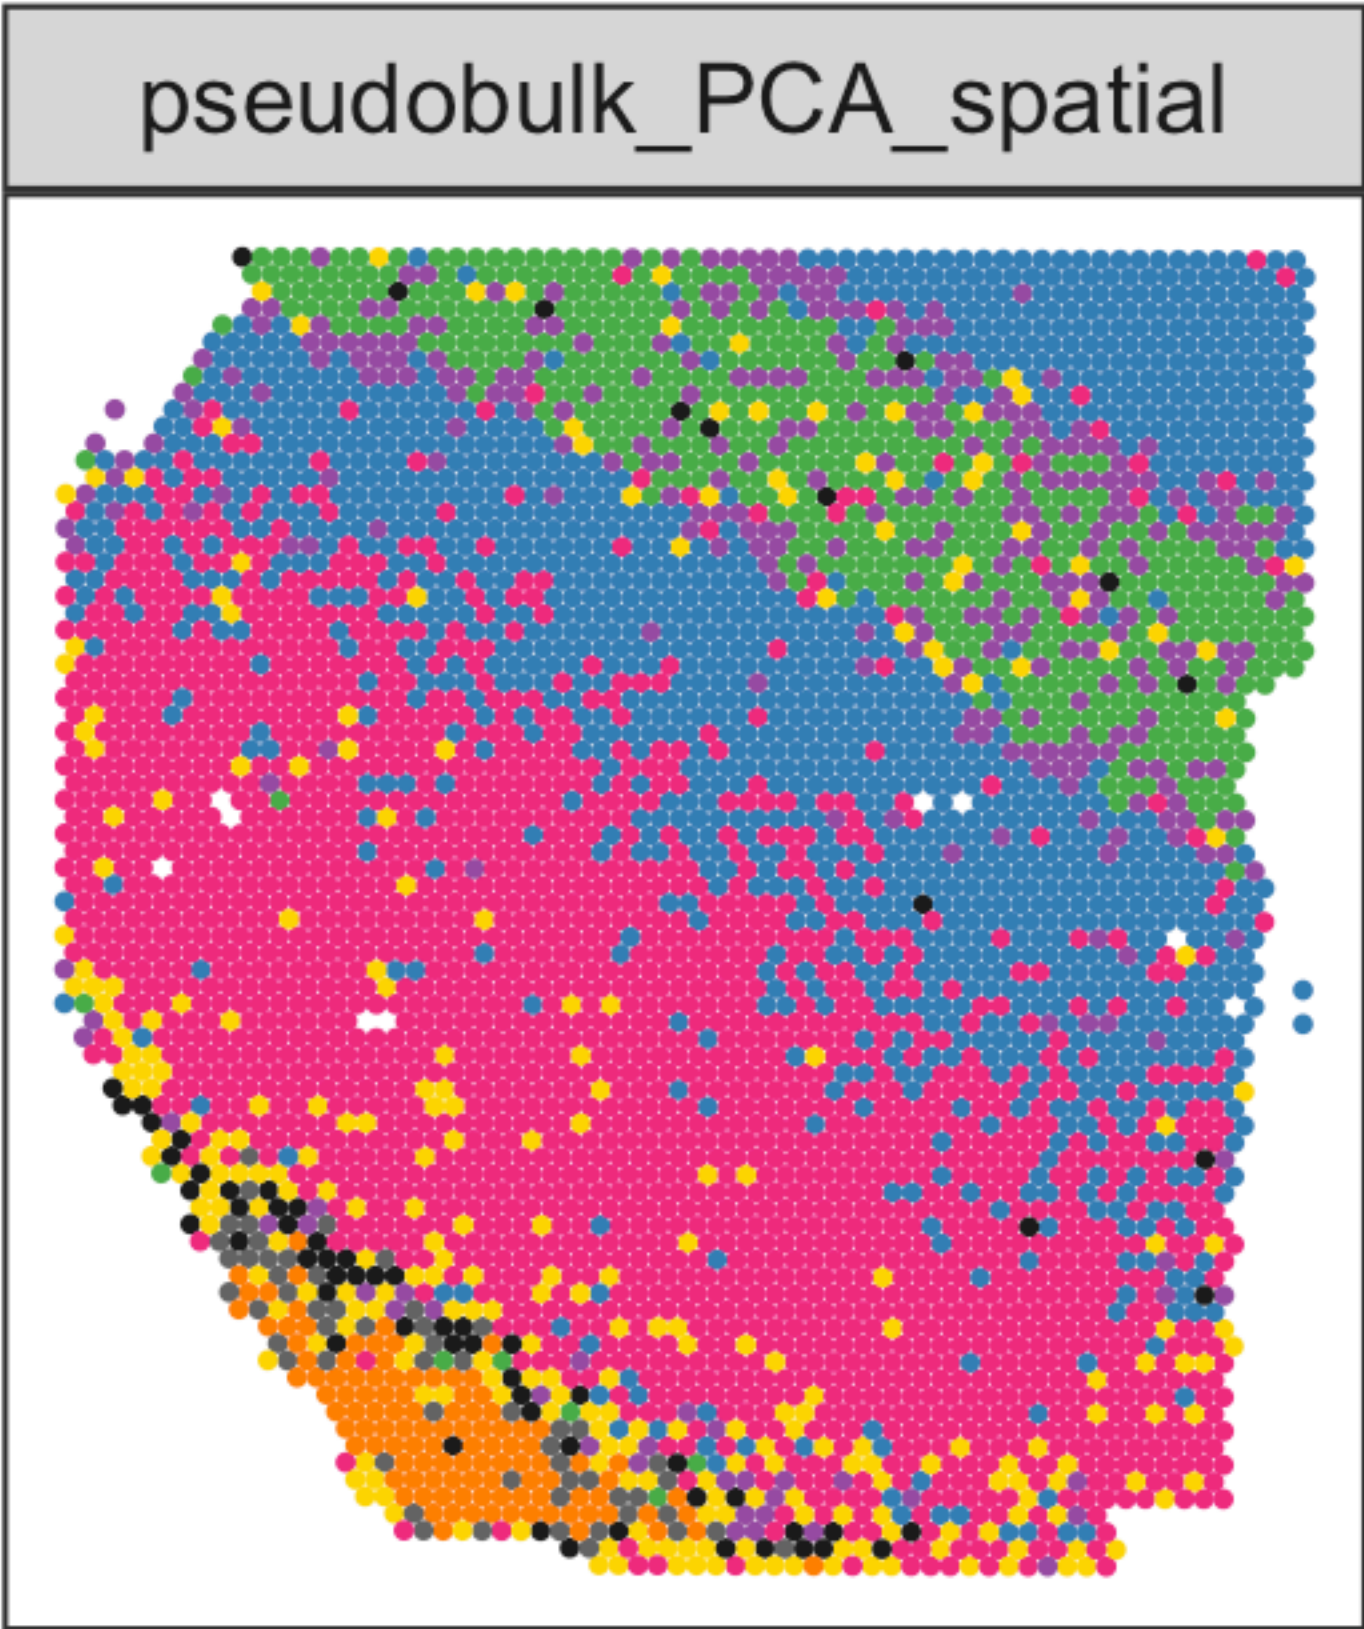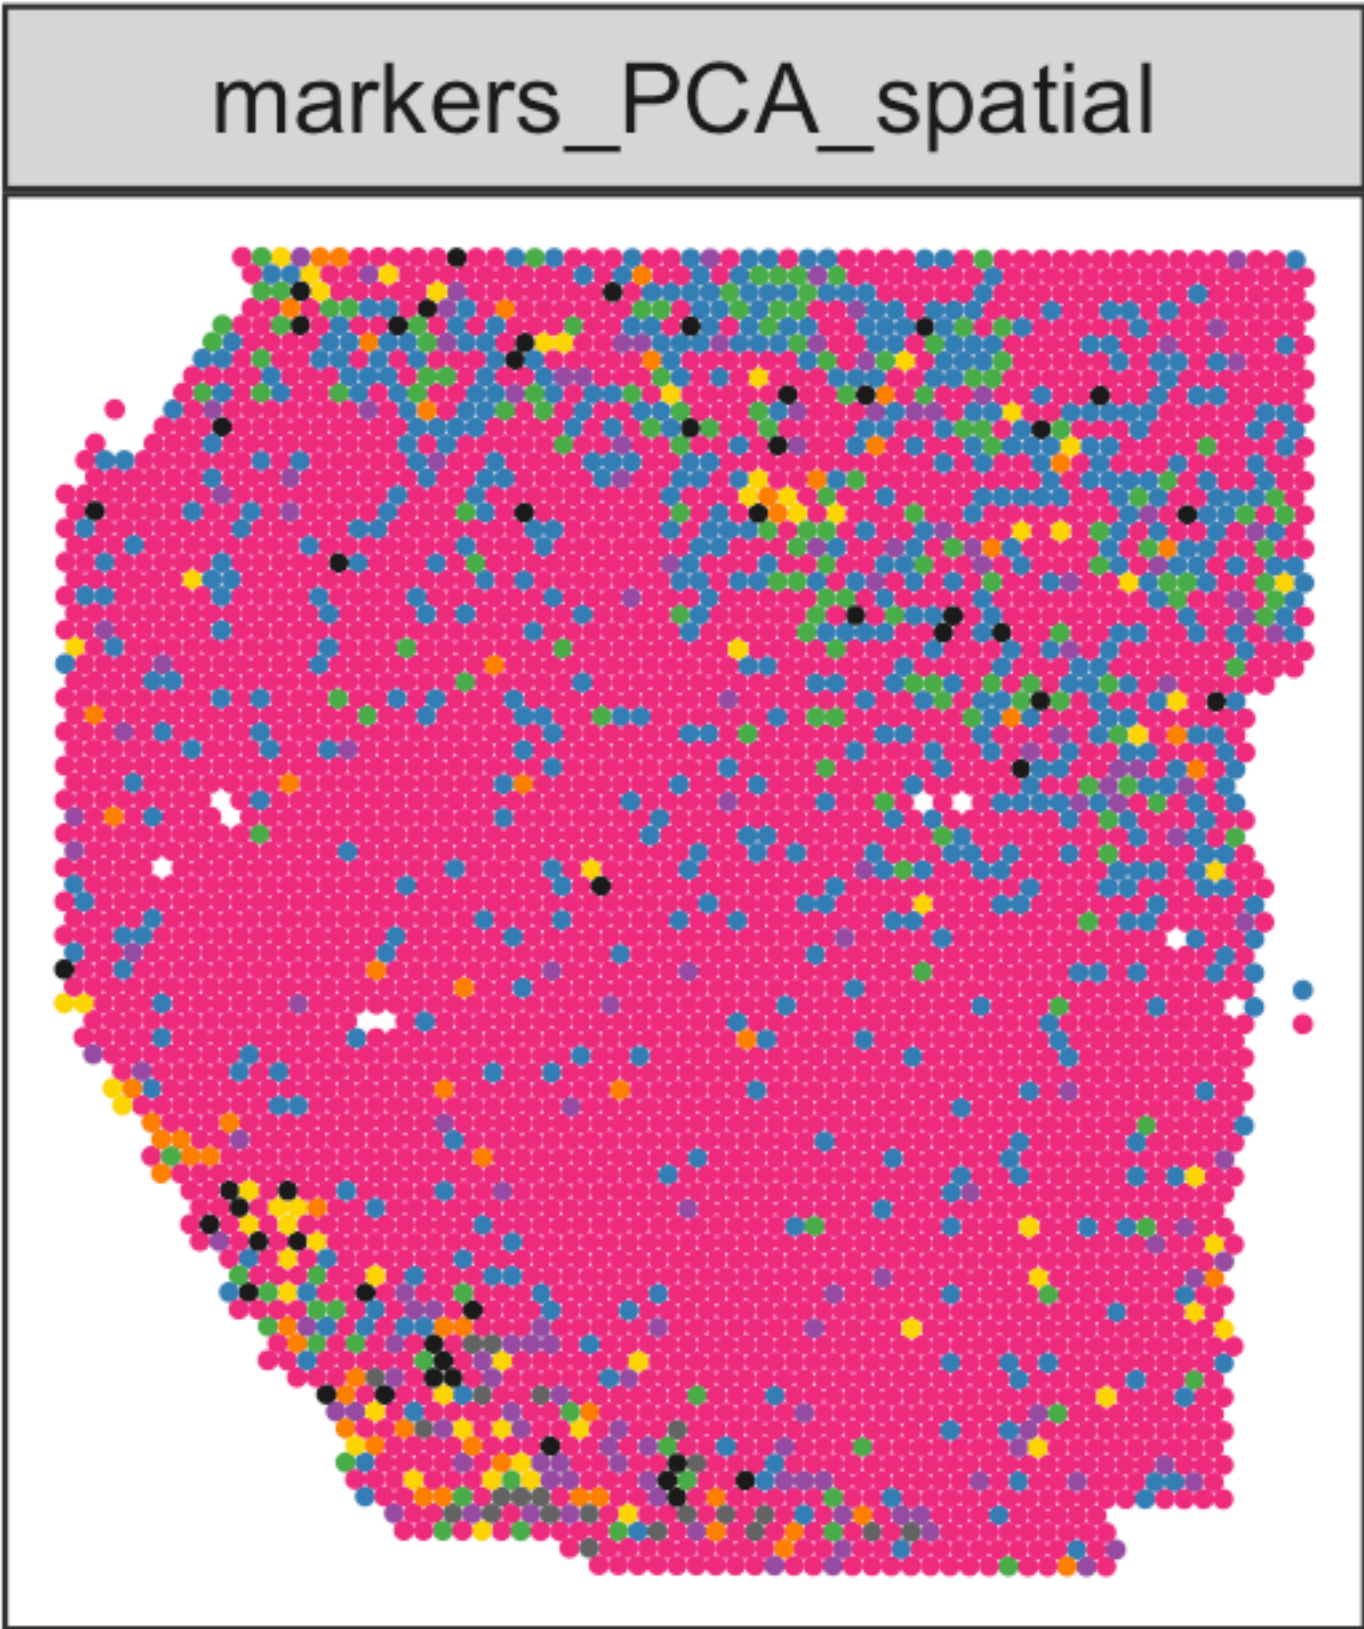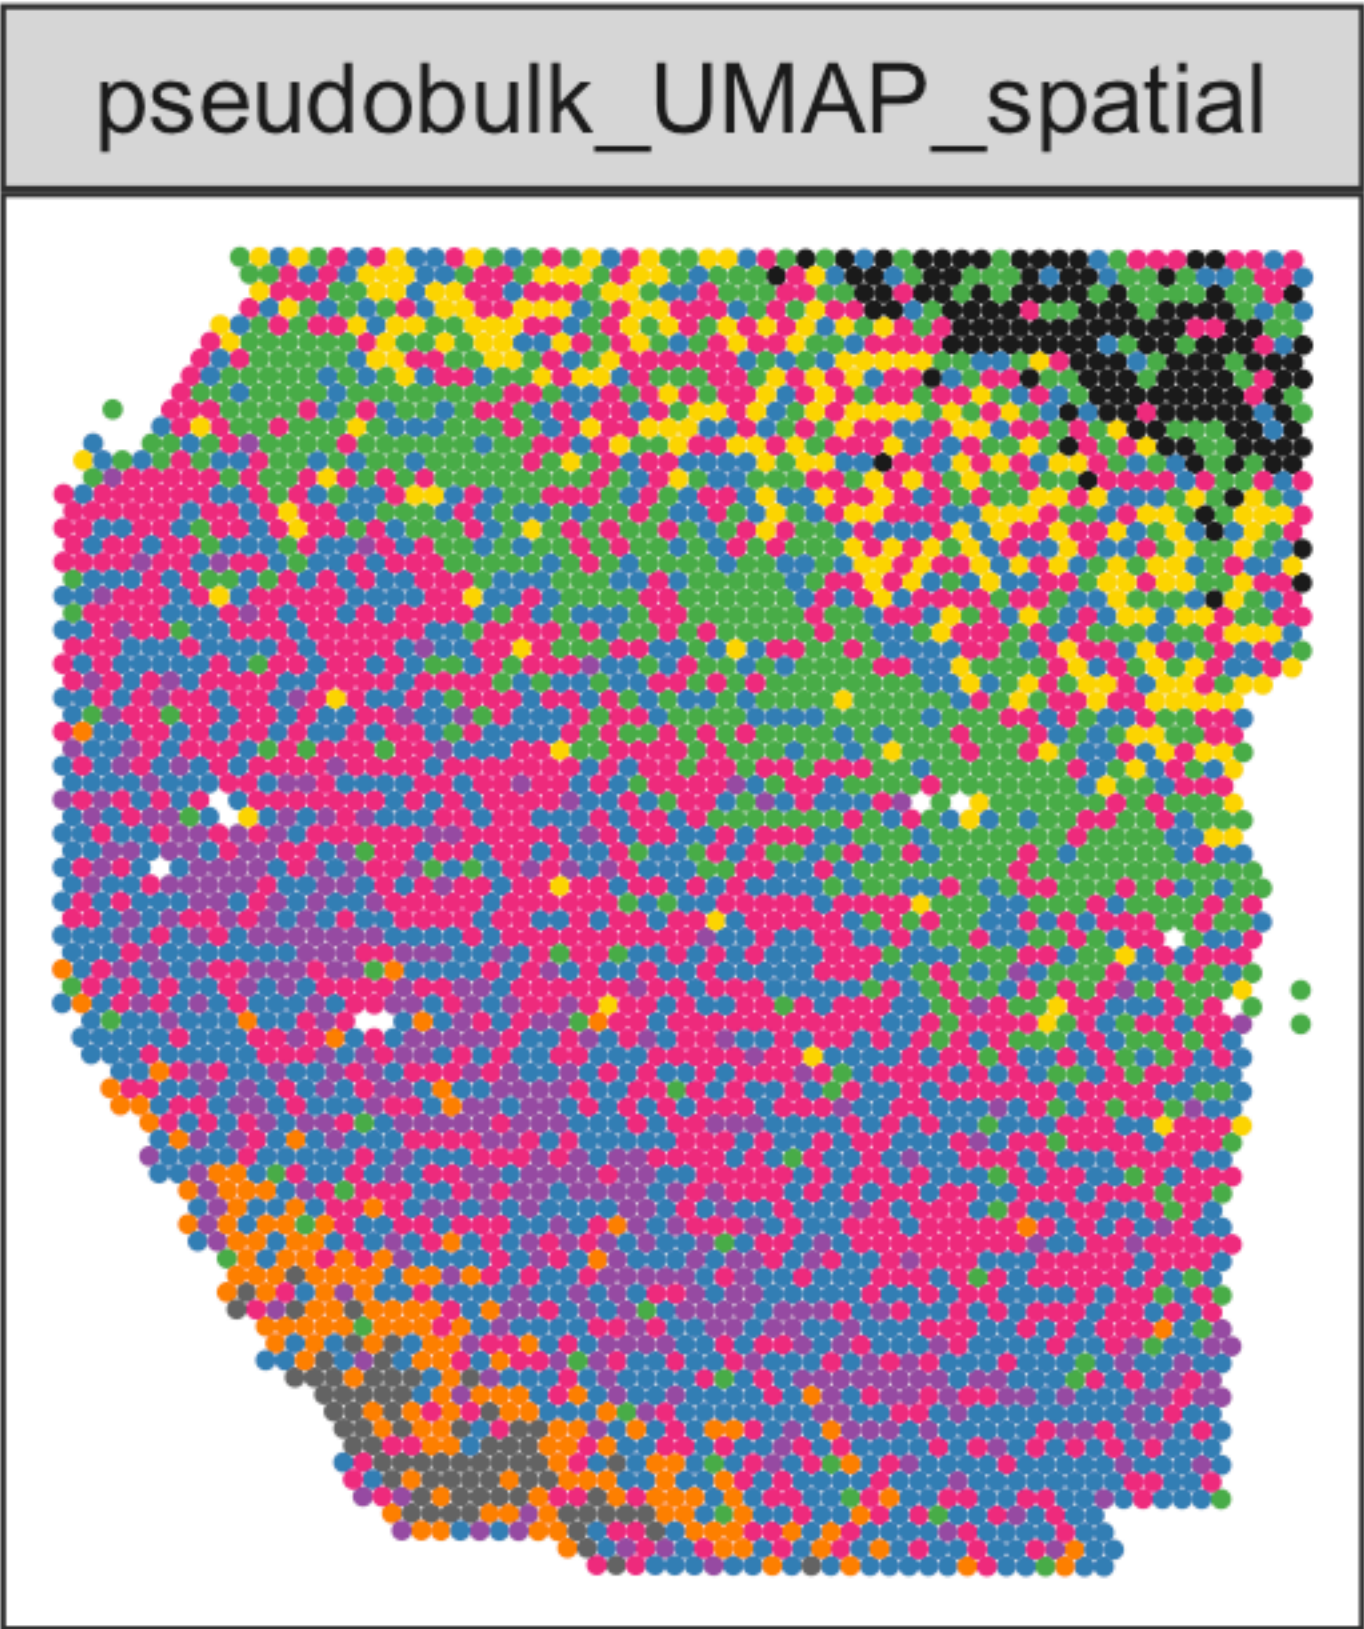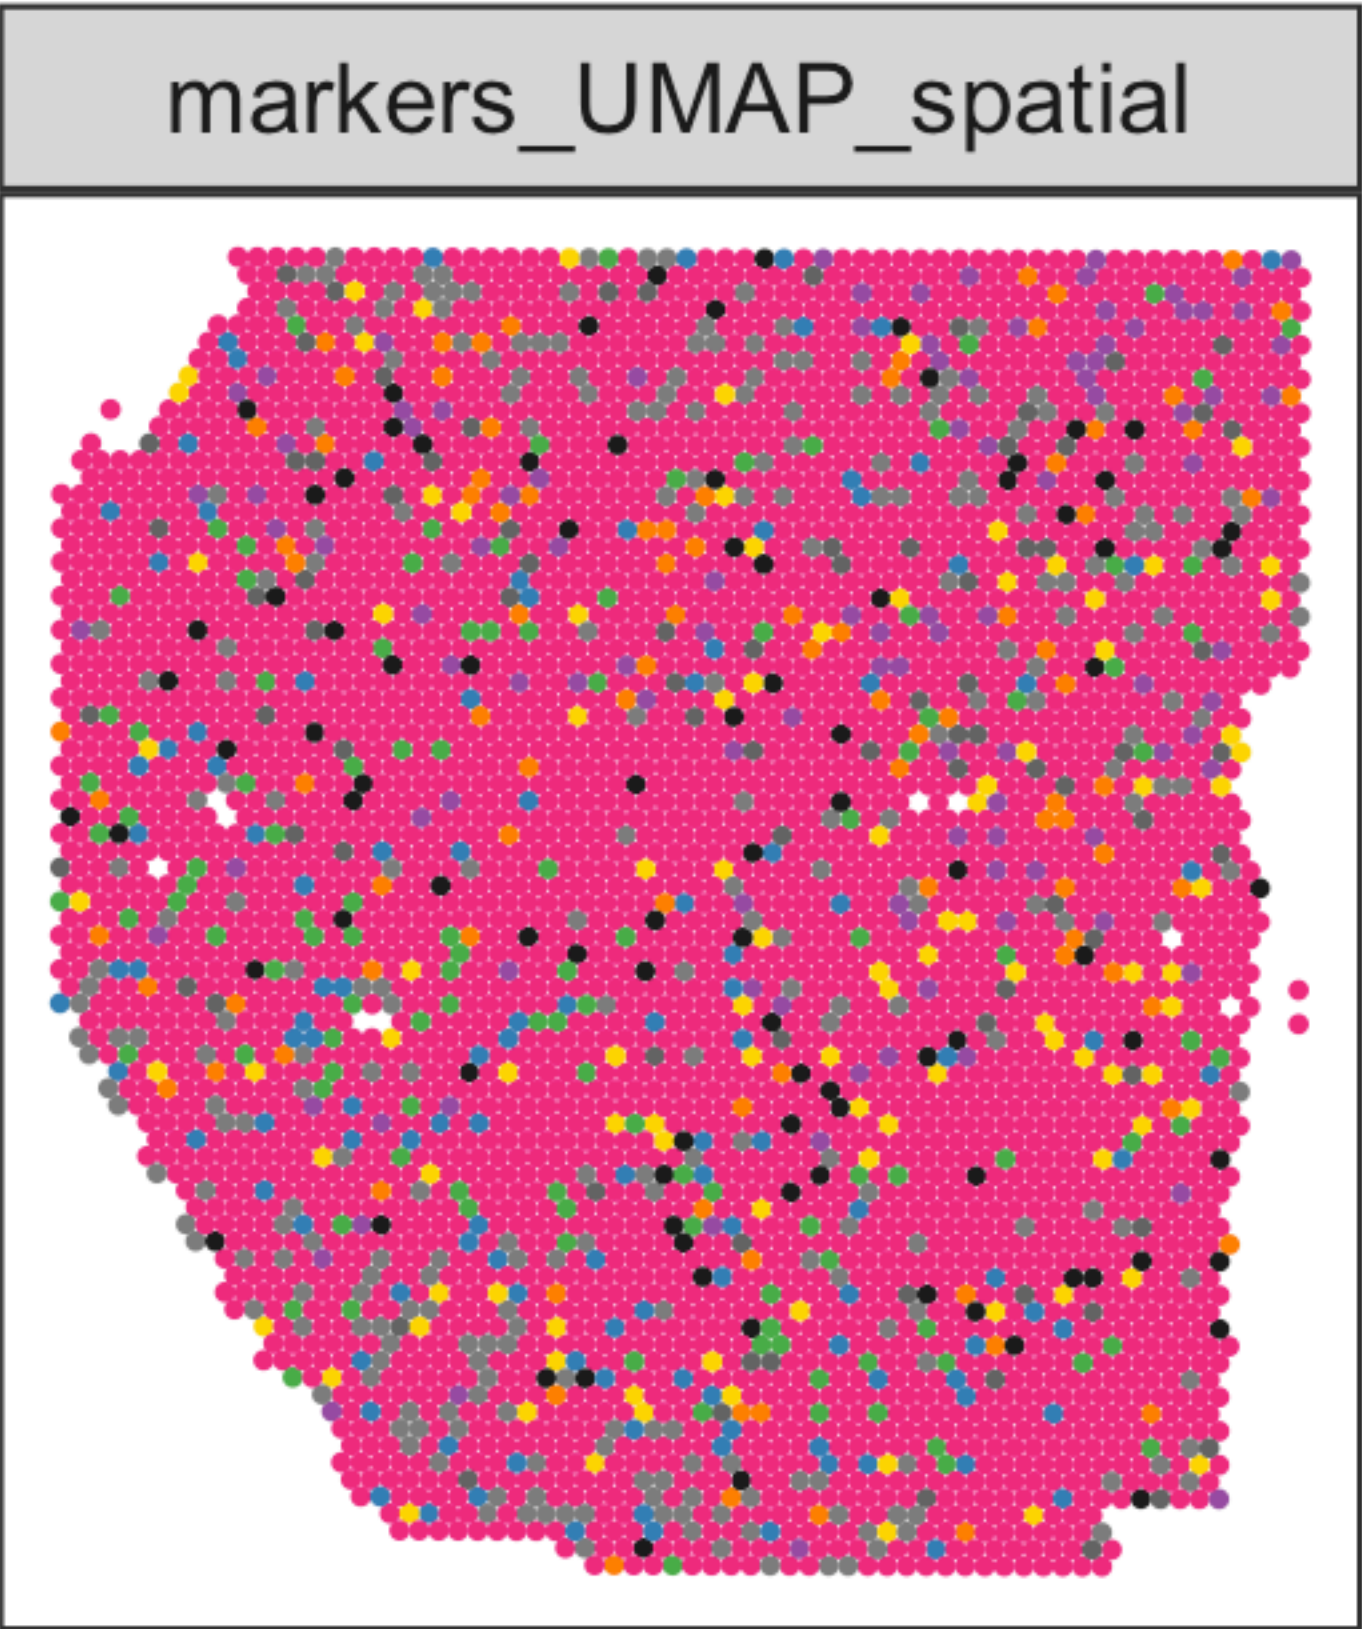

cluster

- 1
- 2
- 3
- 4
- 5
- 6
- 7
- 8
- 9
- 10
- 11
- 12
- 13
- 14



# Sample 151509: Clustering (unsupervised)

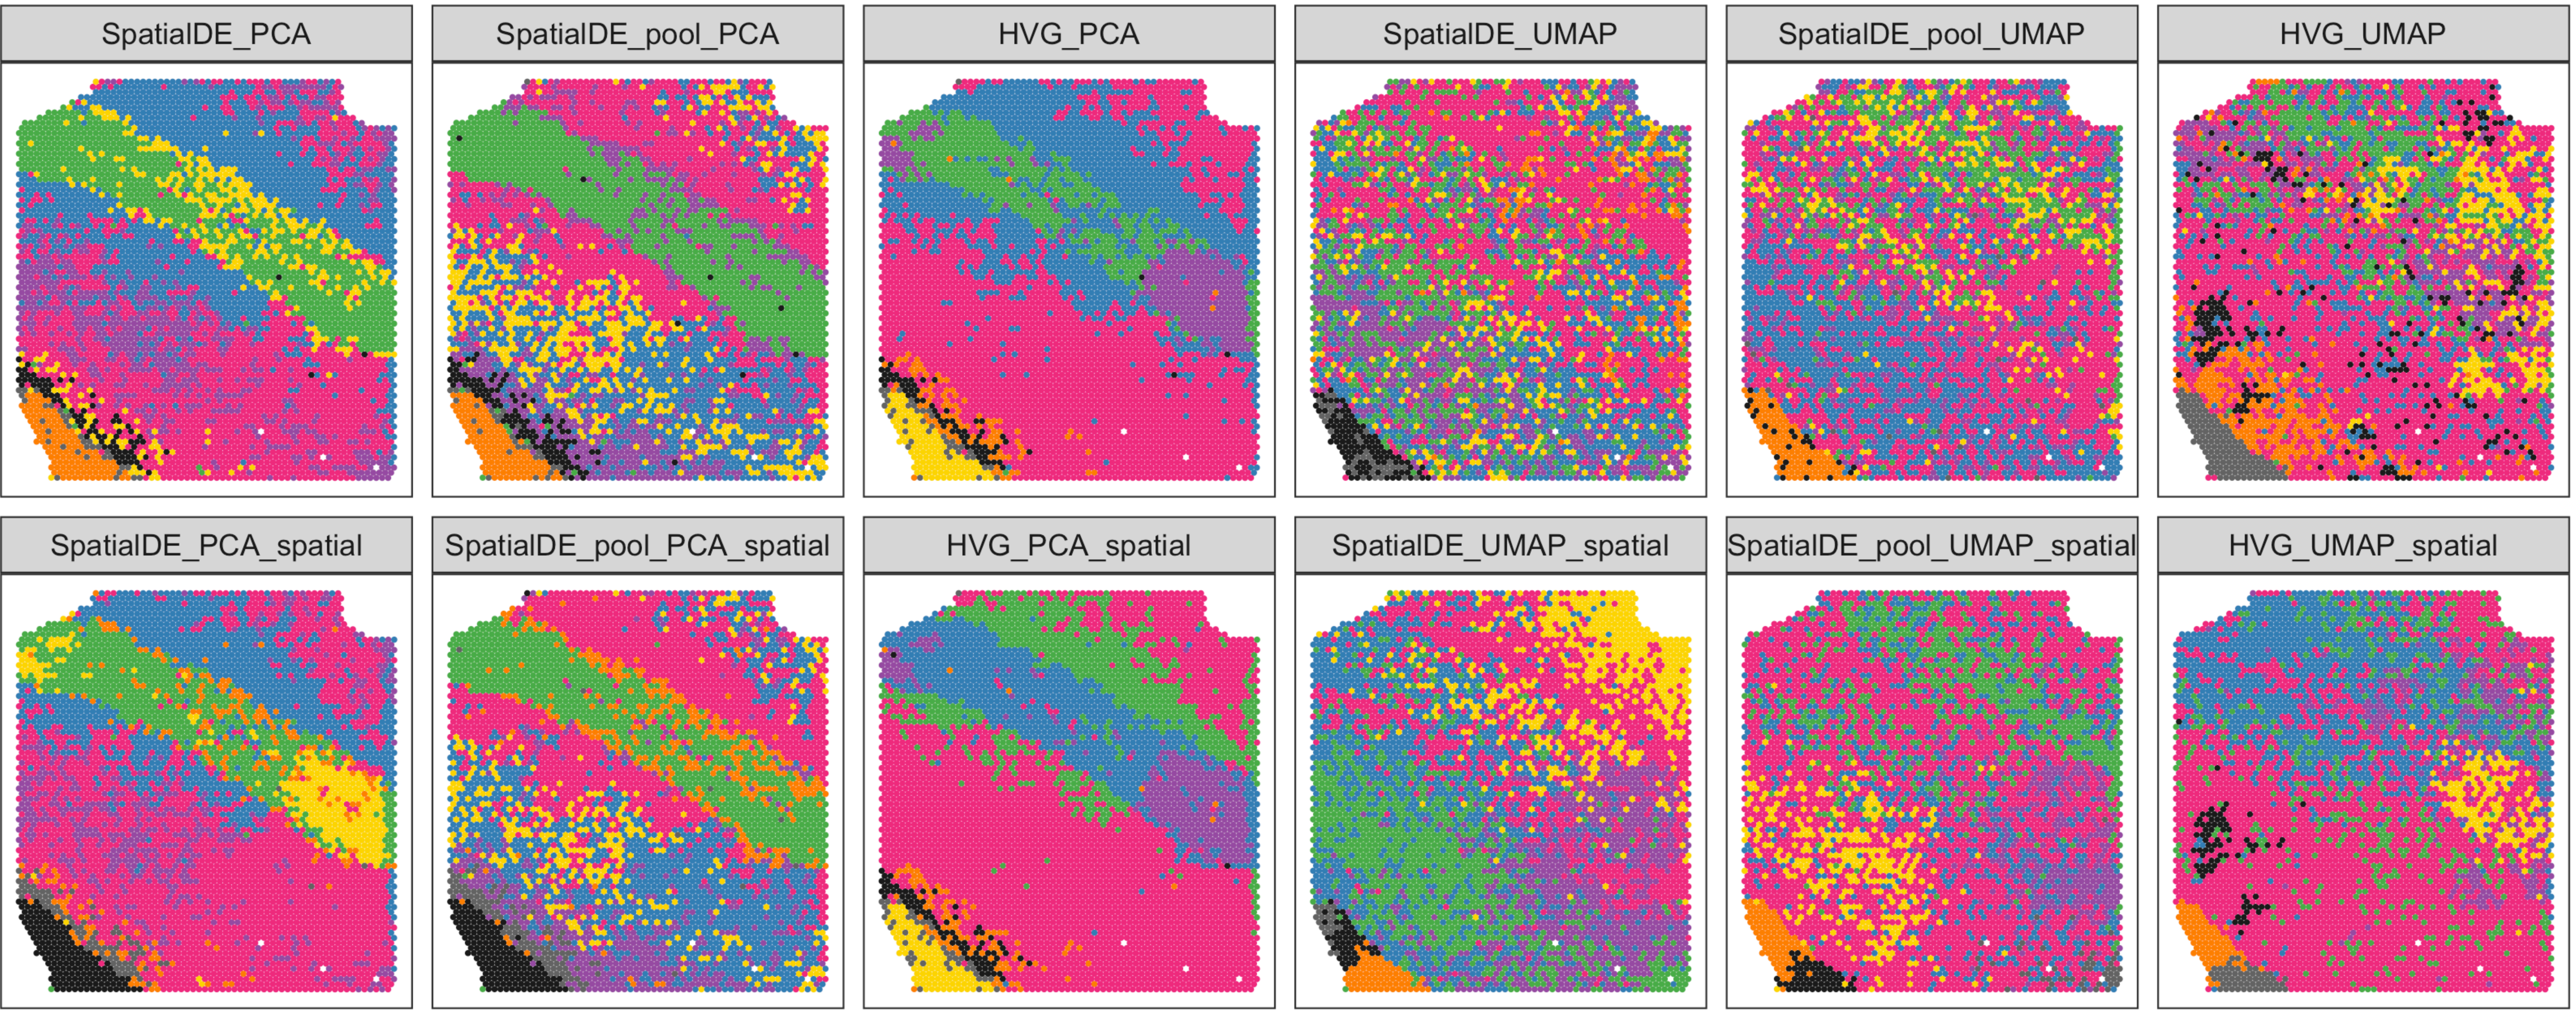

- cluster
- 1
  - 2
  - 3
  - 4
  - 5
  - 6
  - 7
  - 8



# Sample 151509: Clustering (semi-supervised and markers)

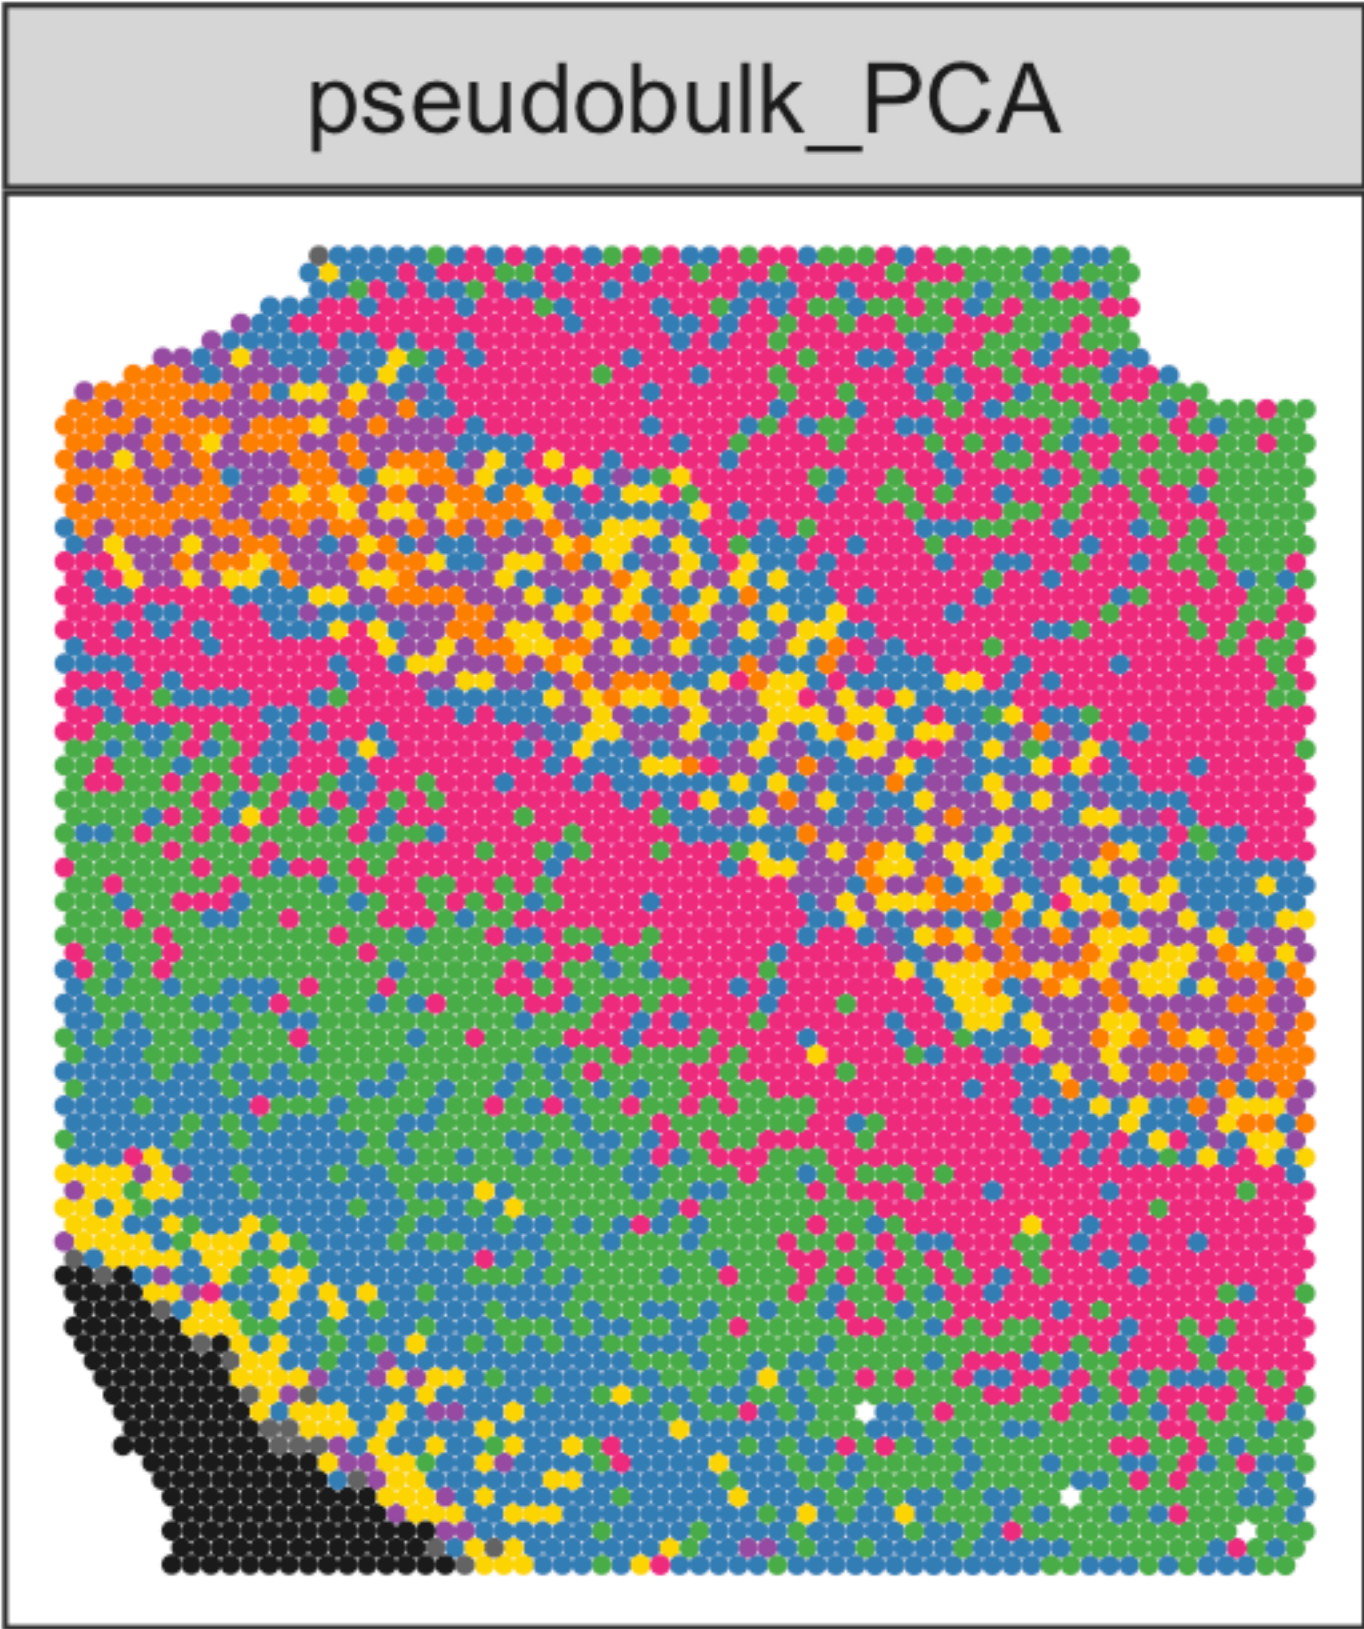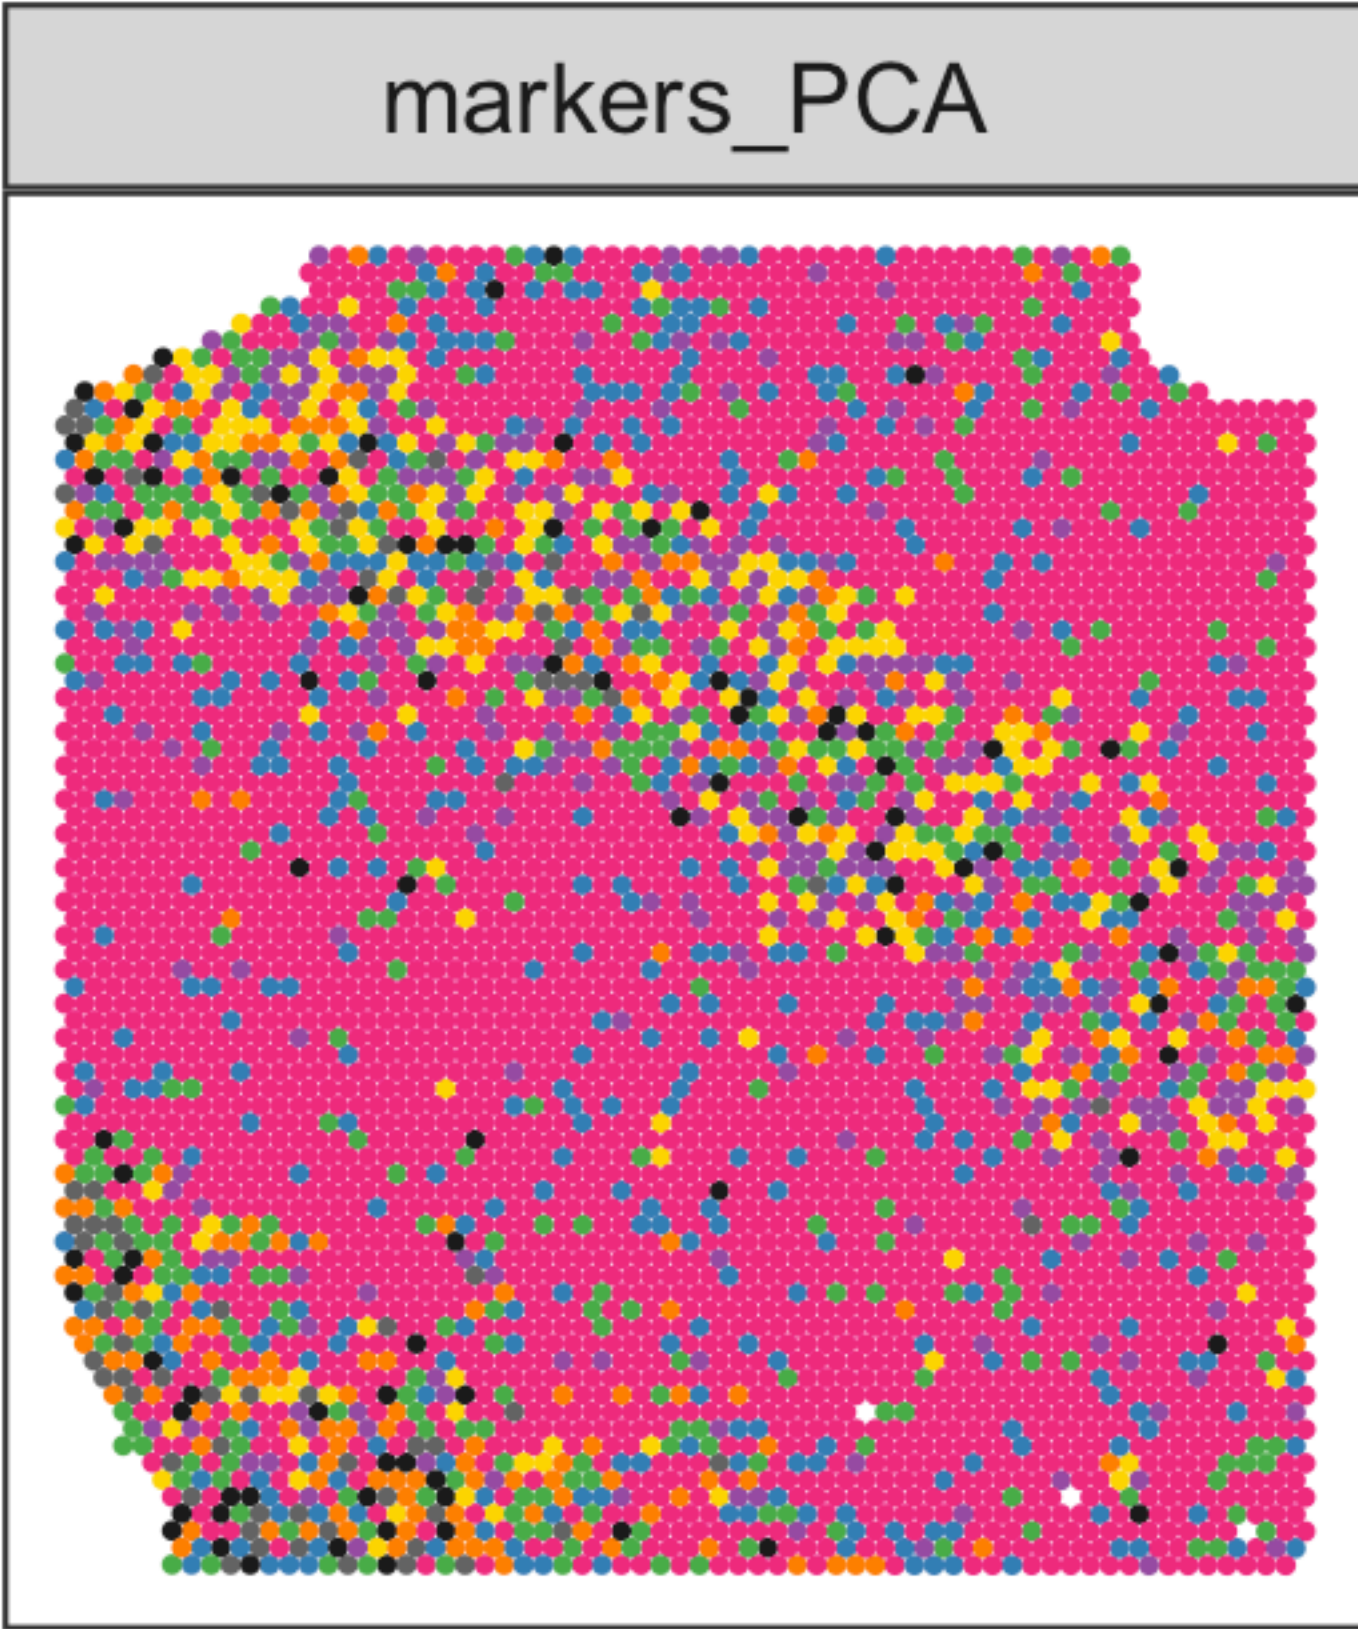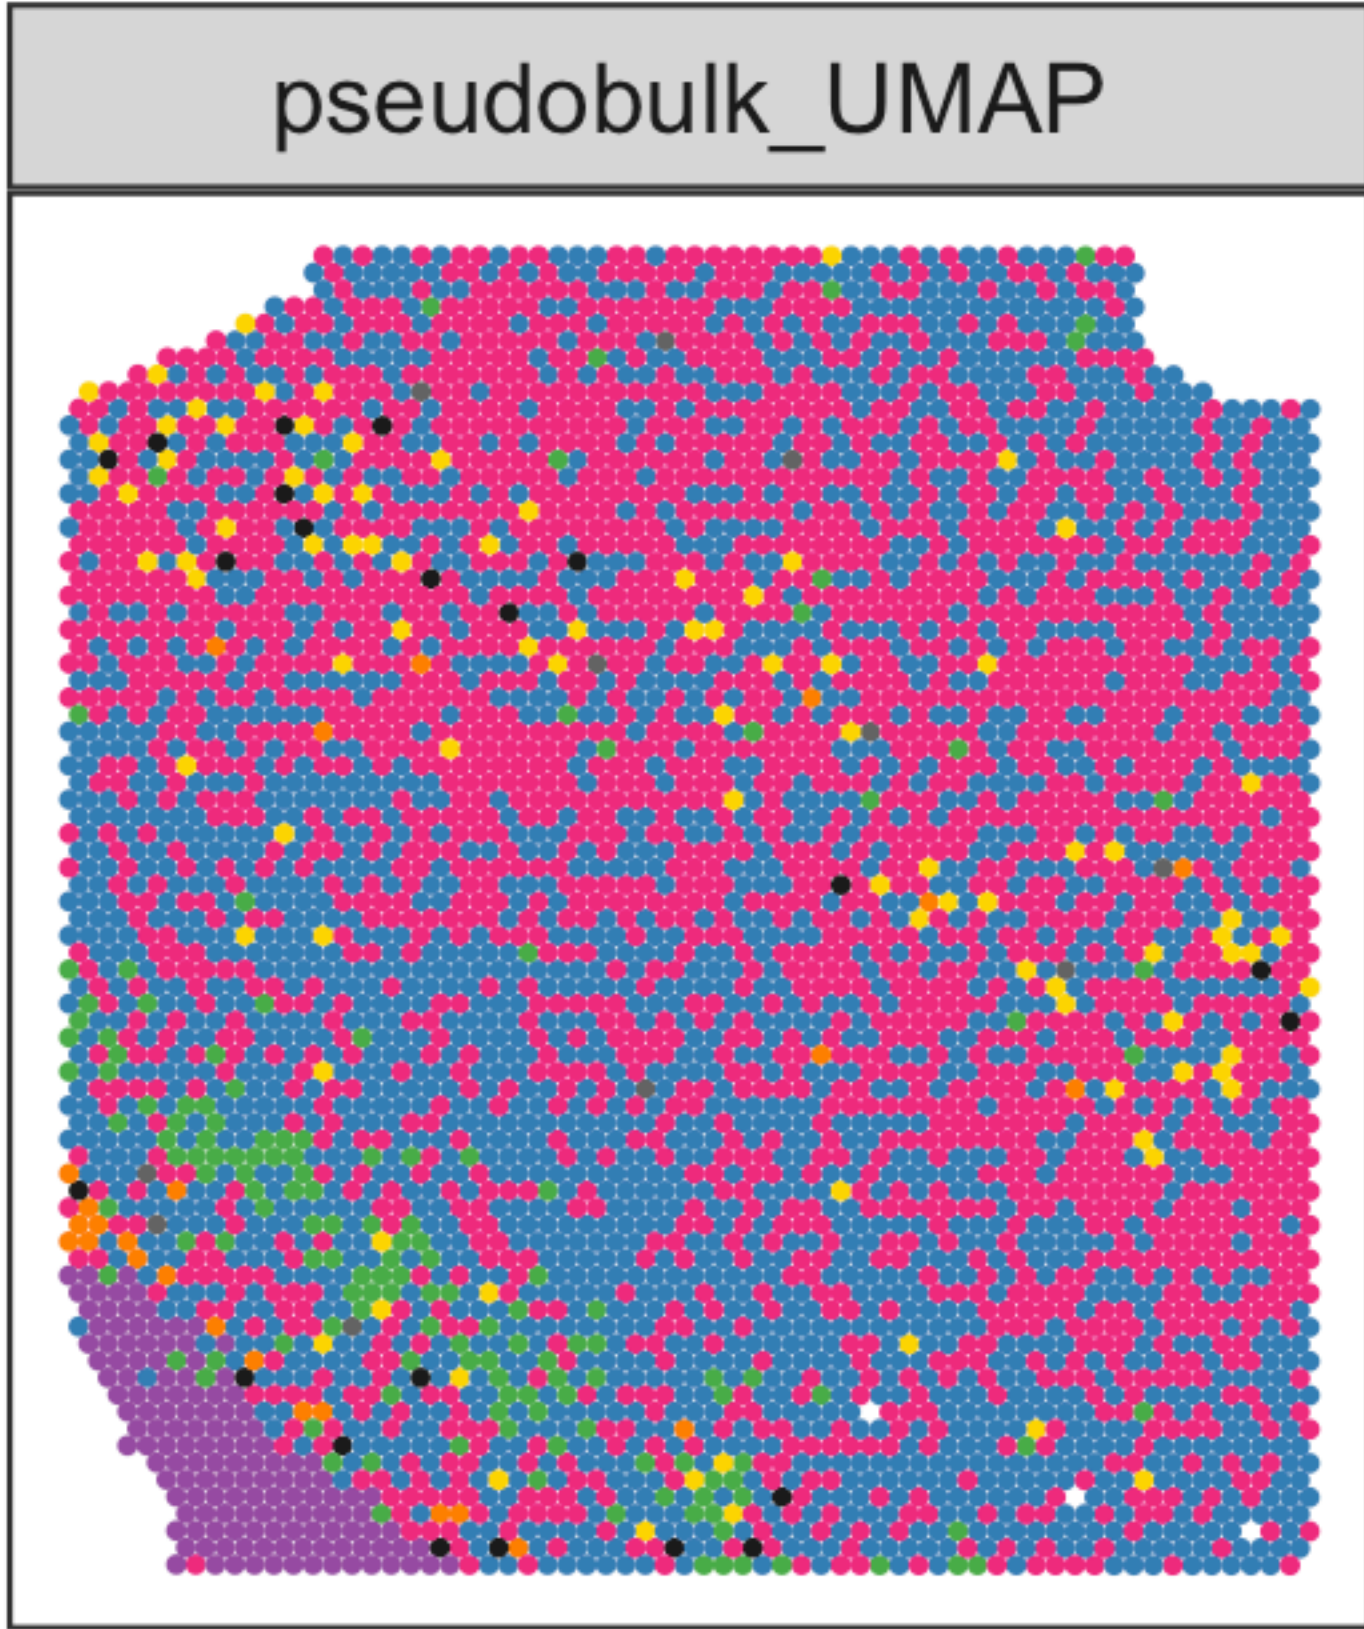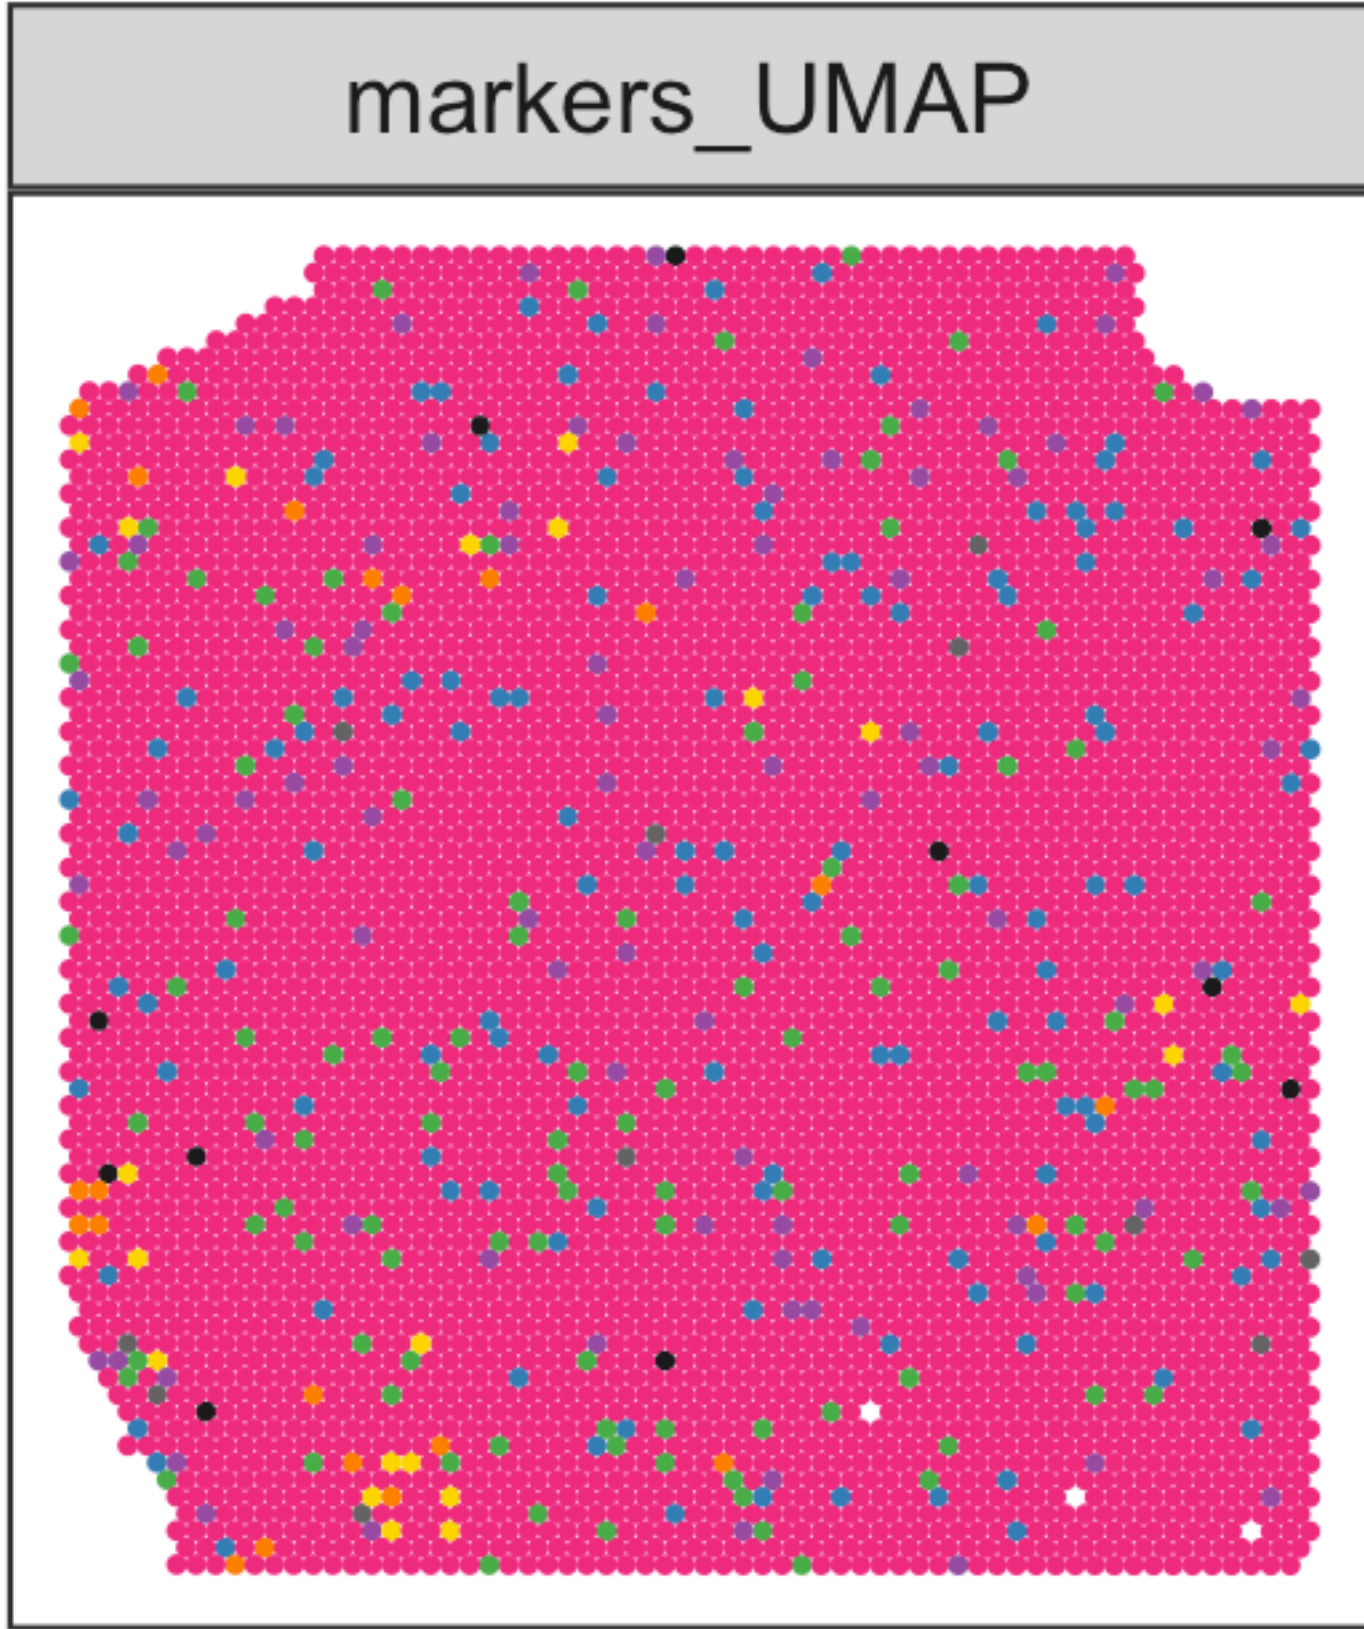

cluster

- 1
- 2
- 3
- 4
- 5
- 6
- 7
- 8

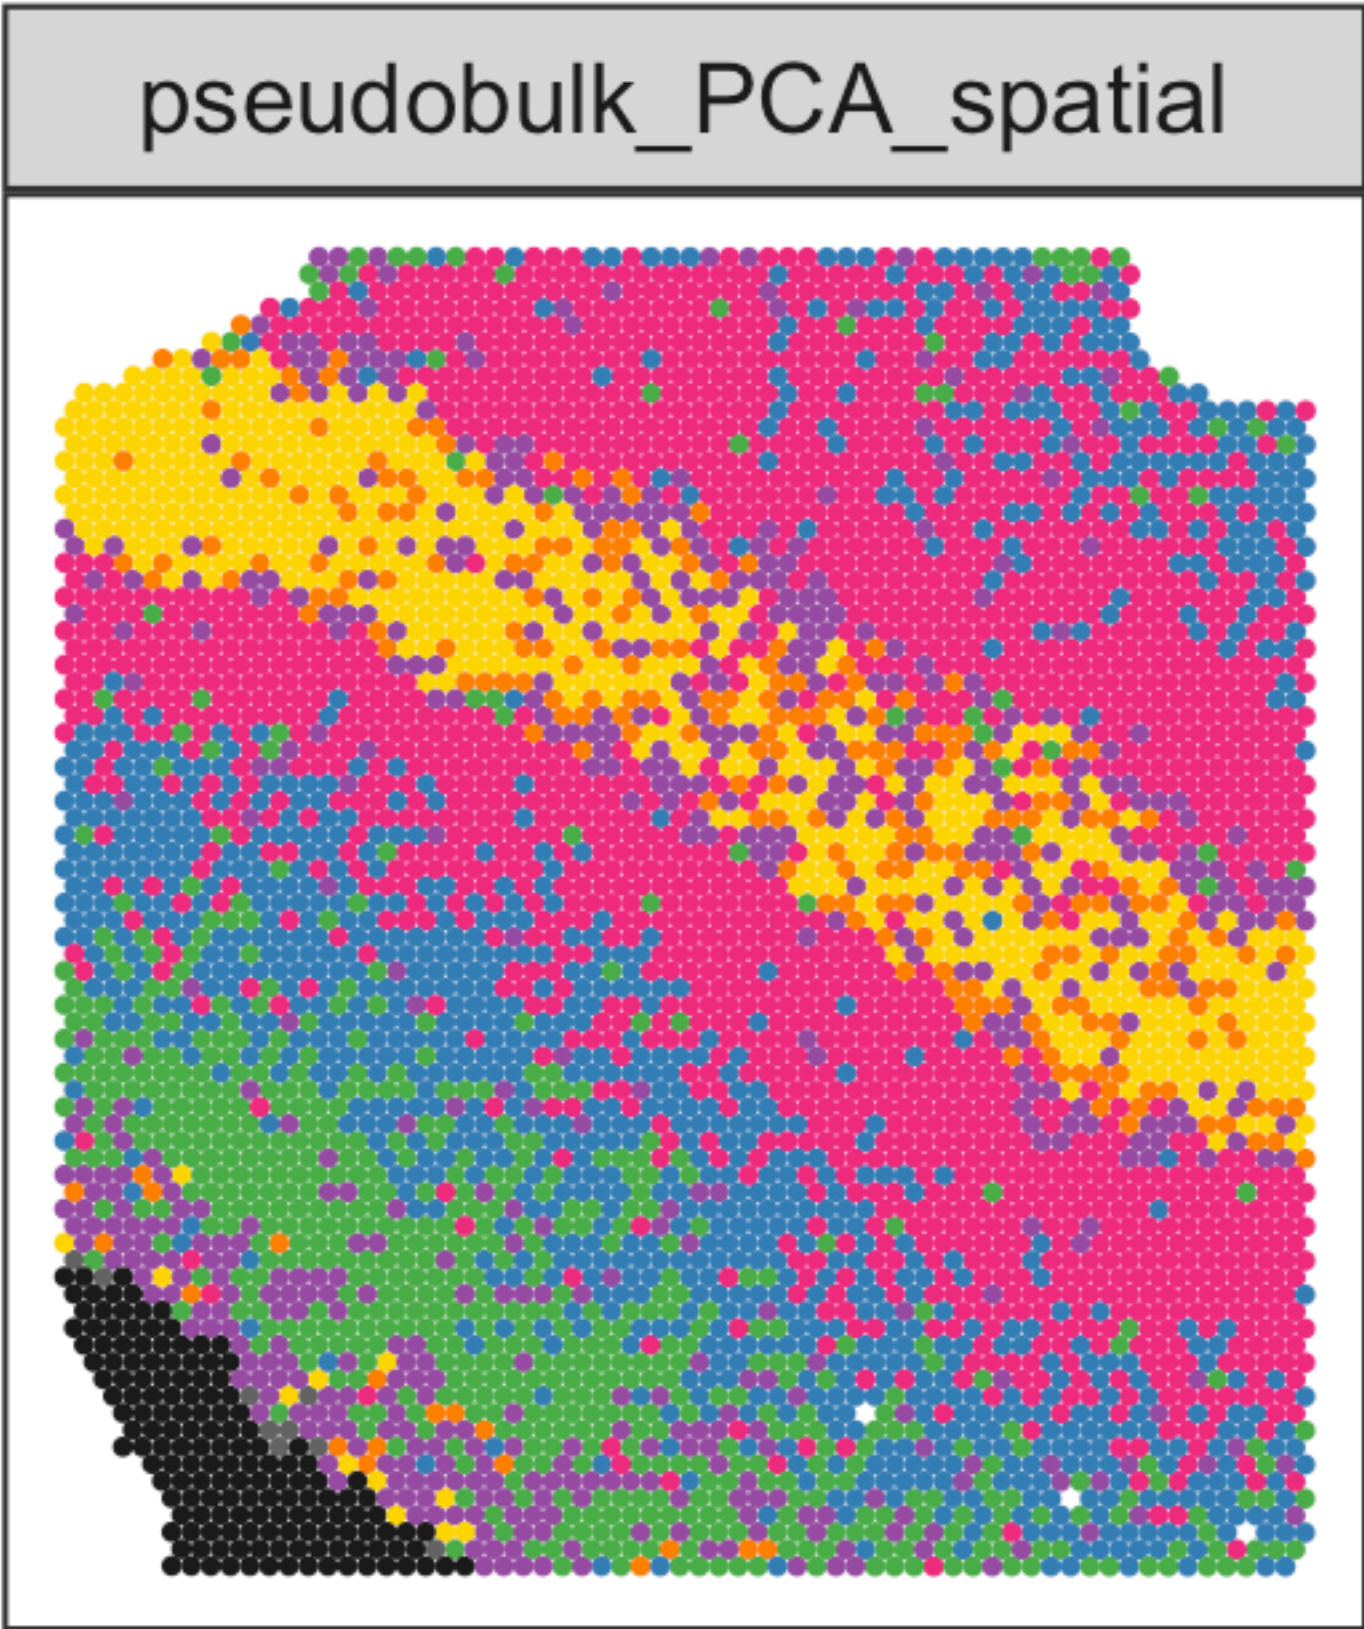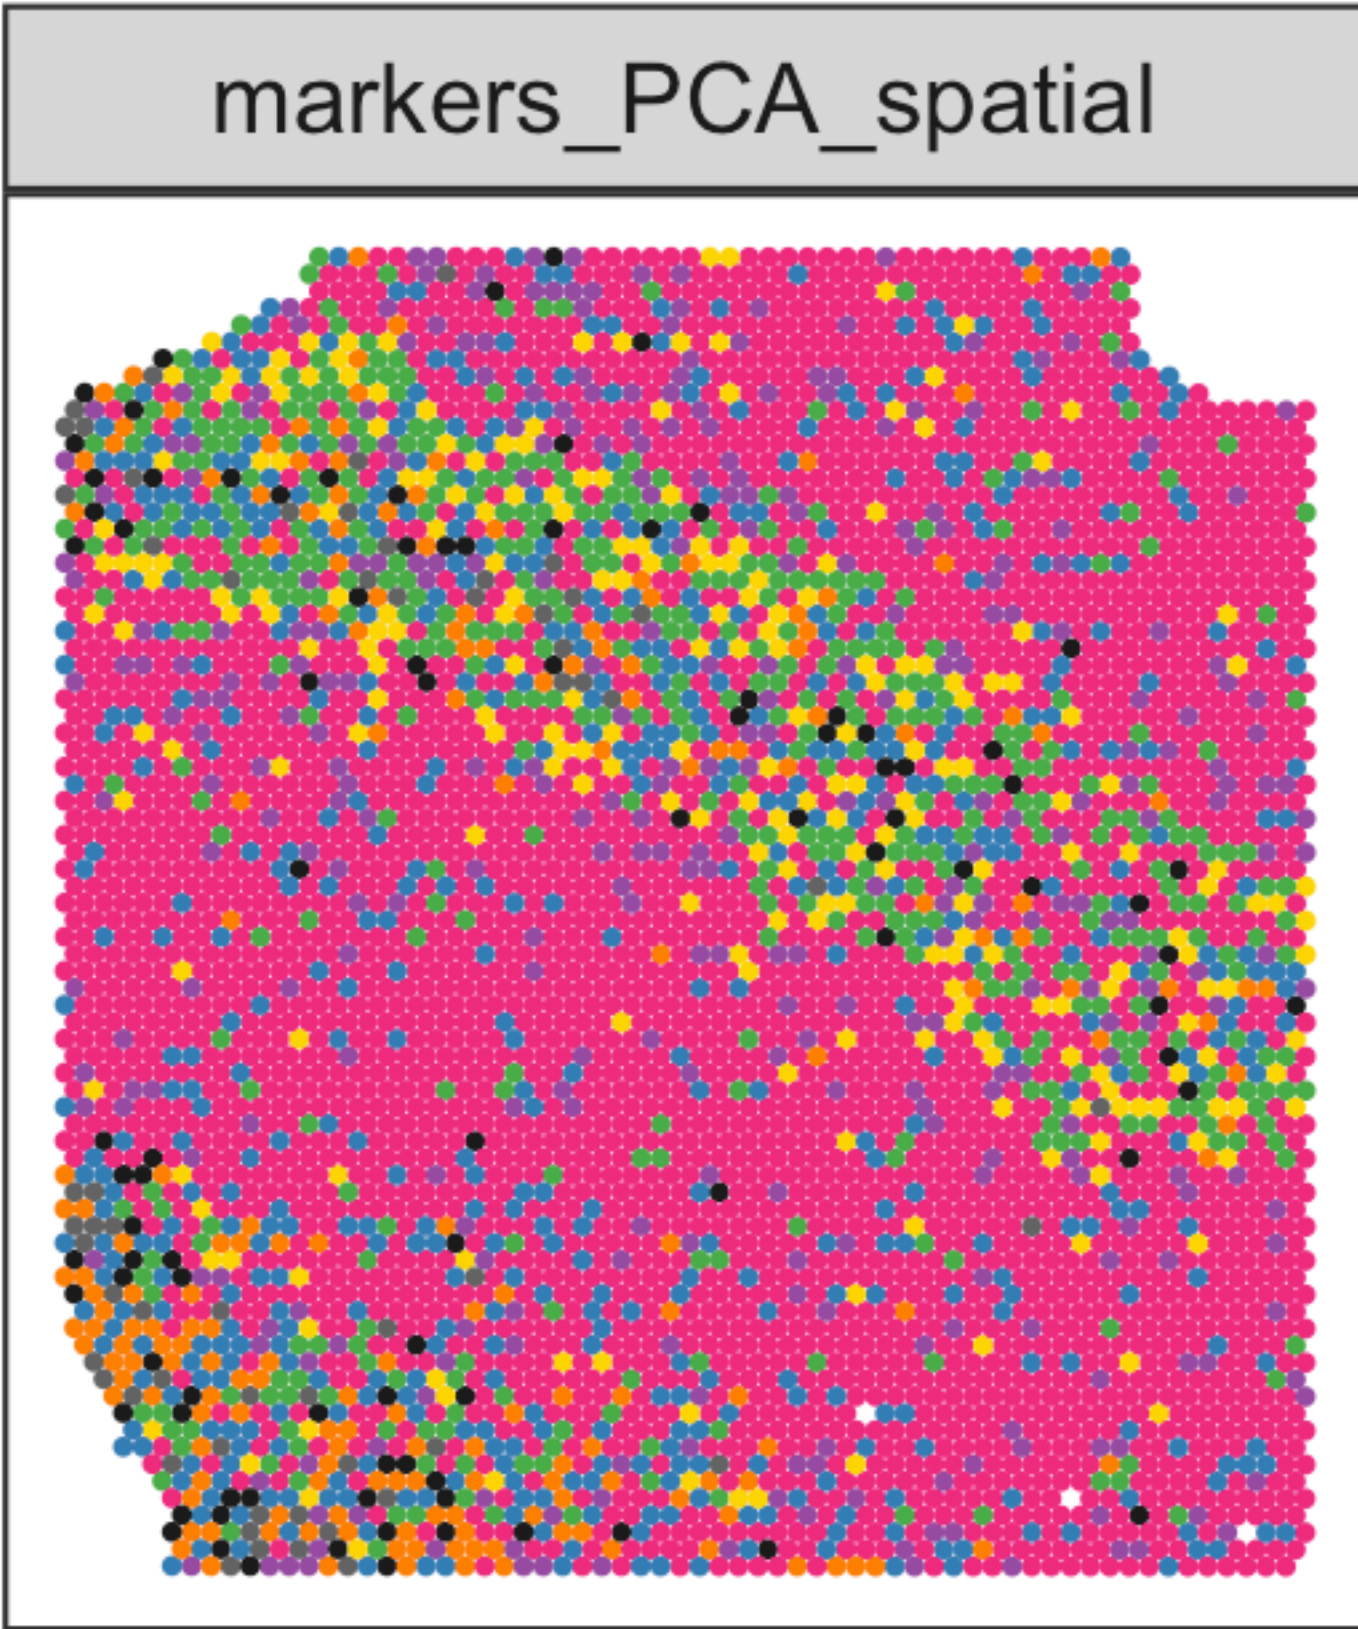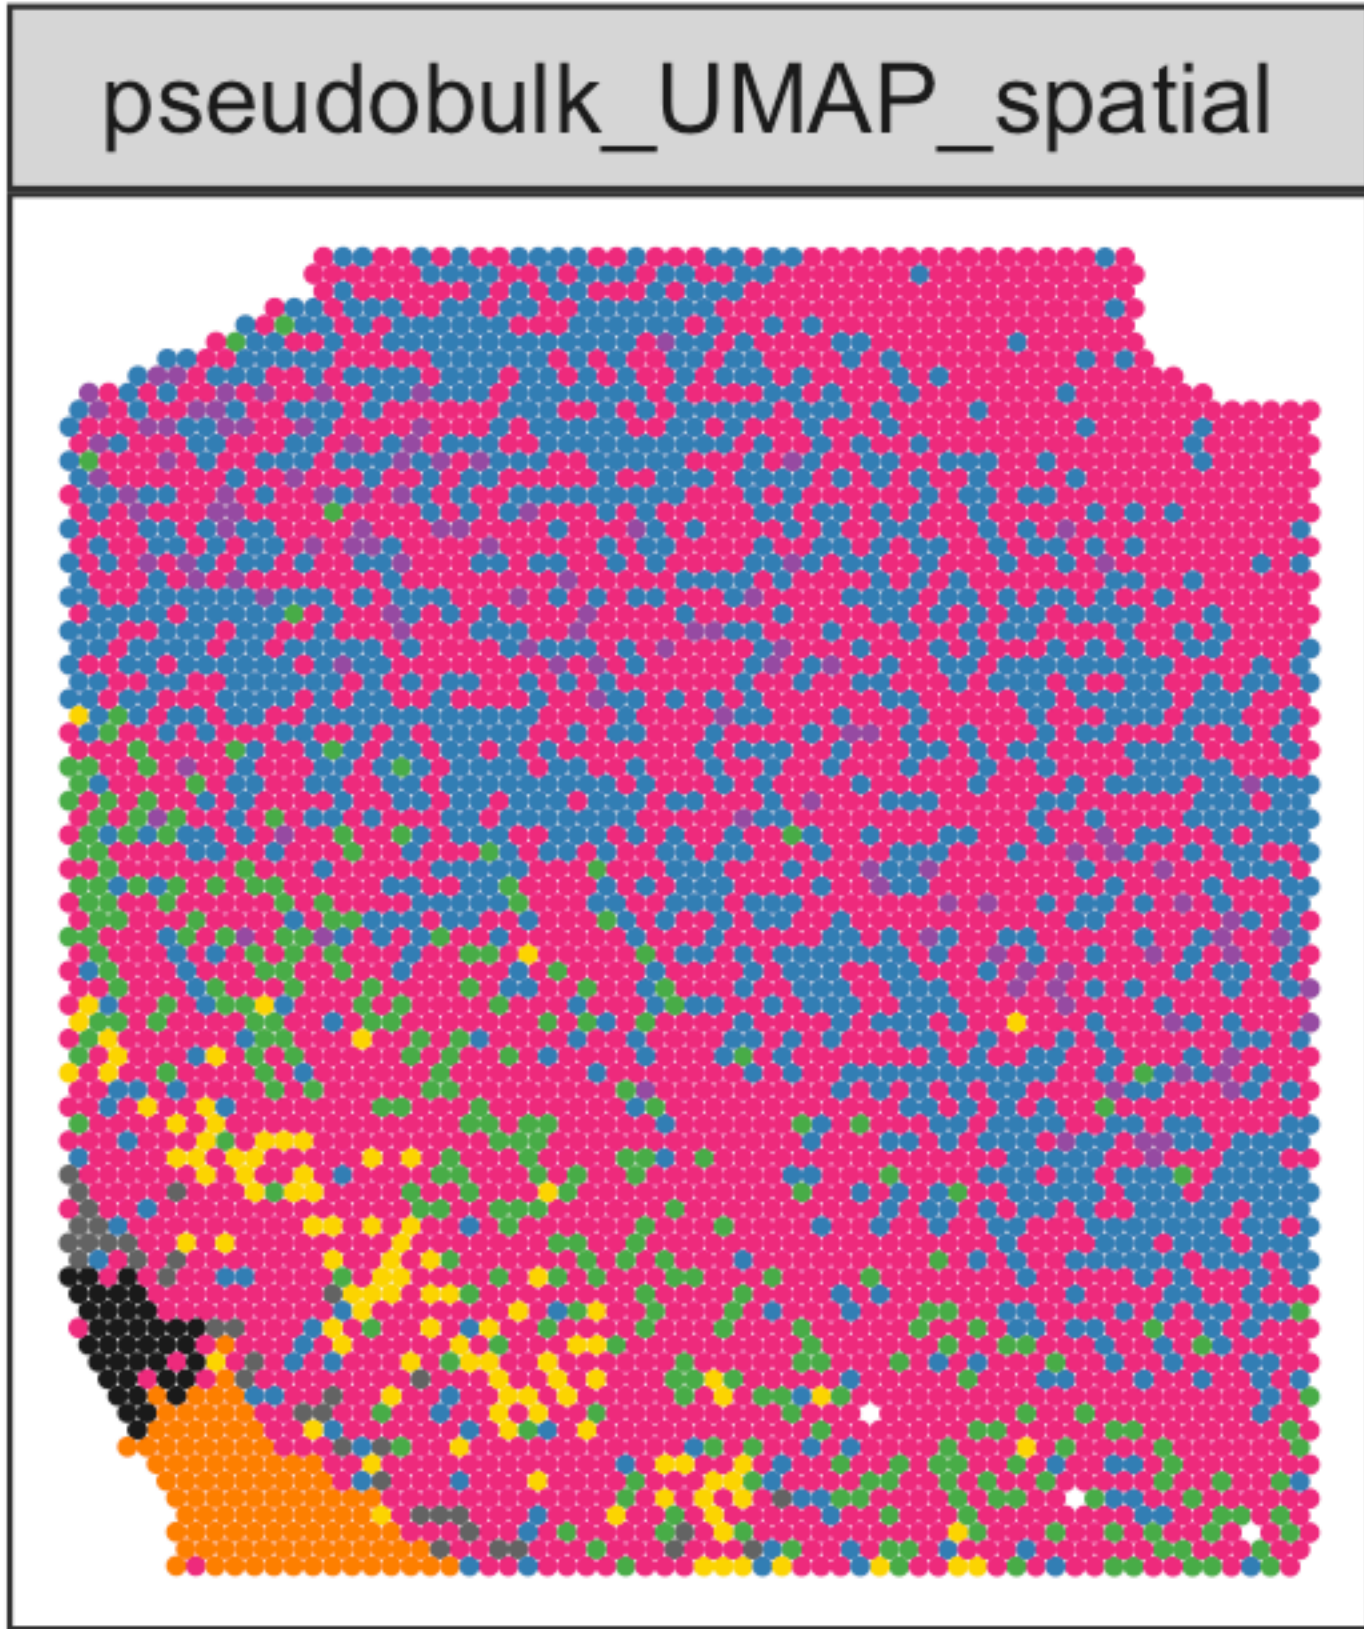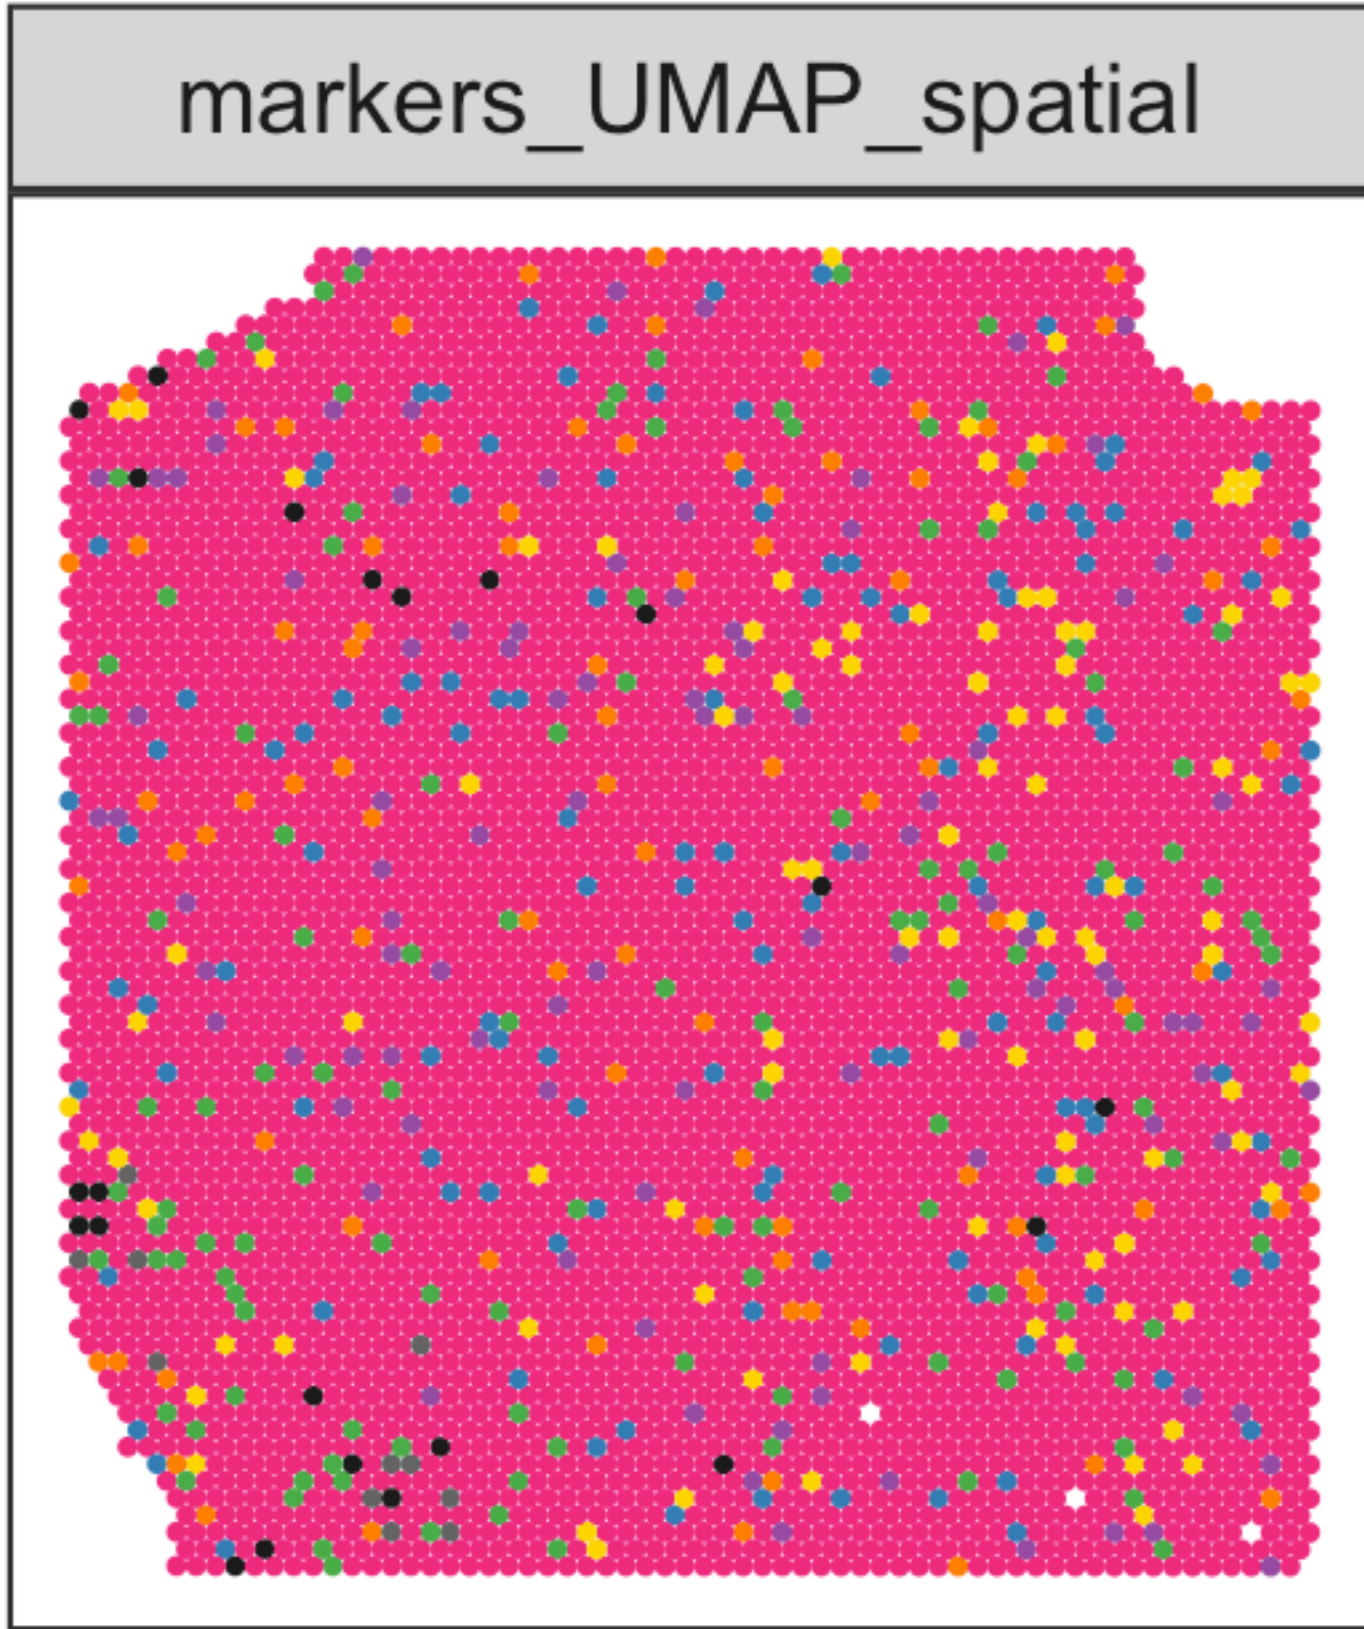



# Sample 151510: Clustering (unsupervised)

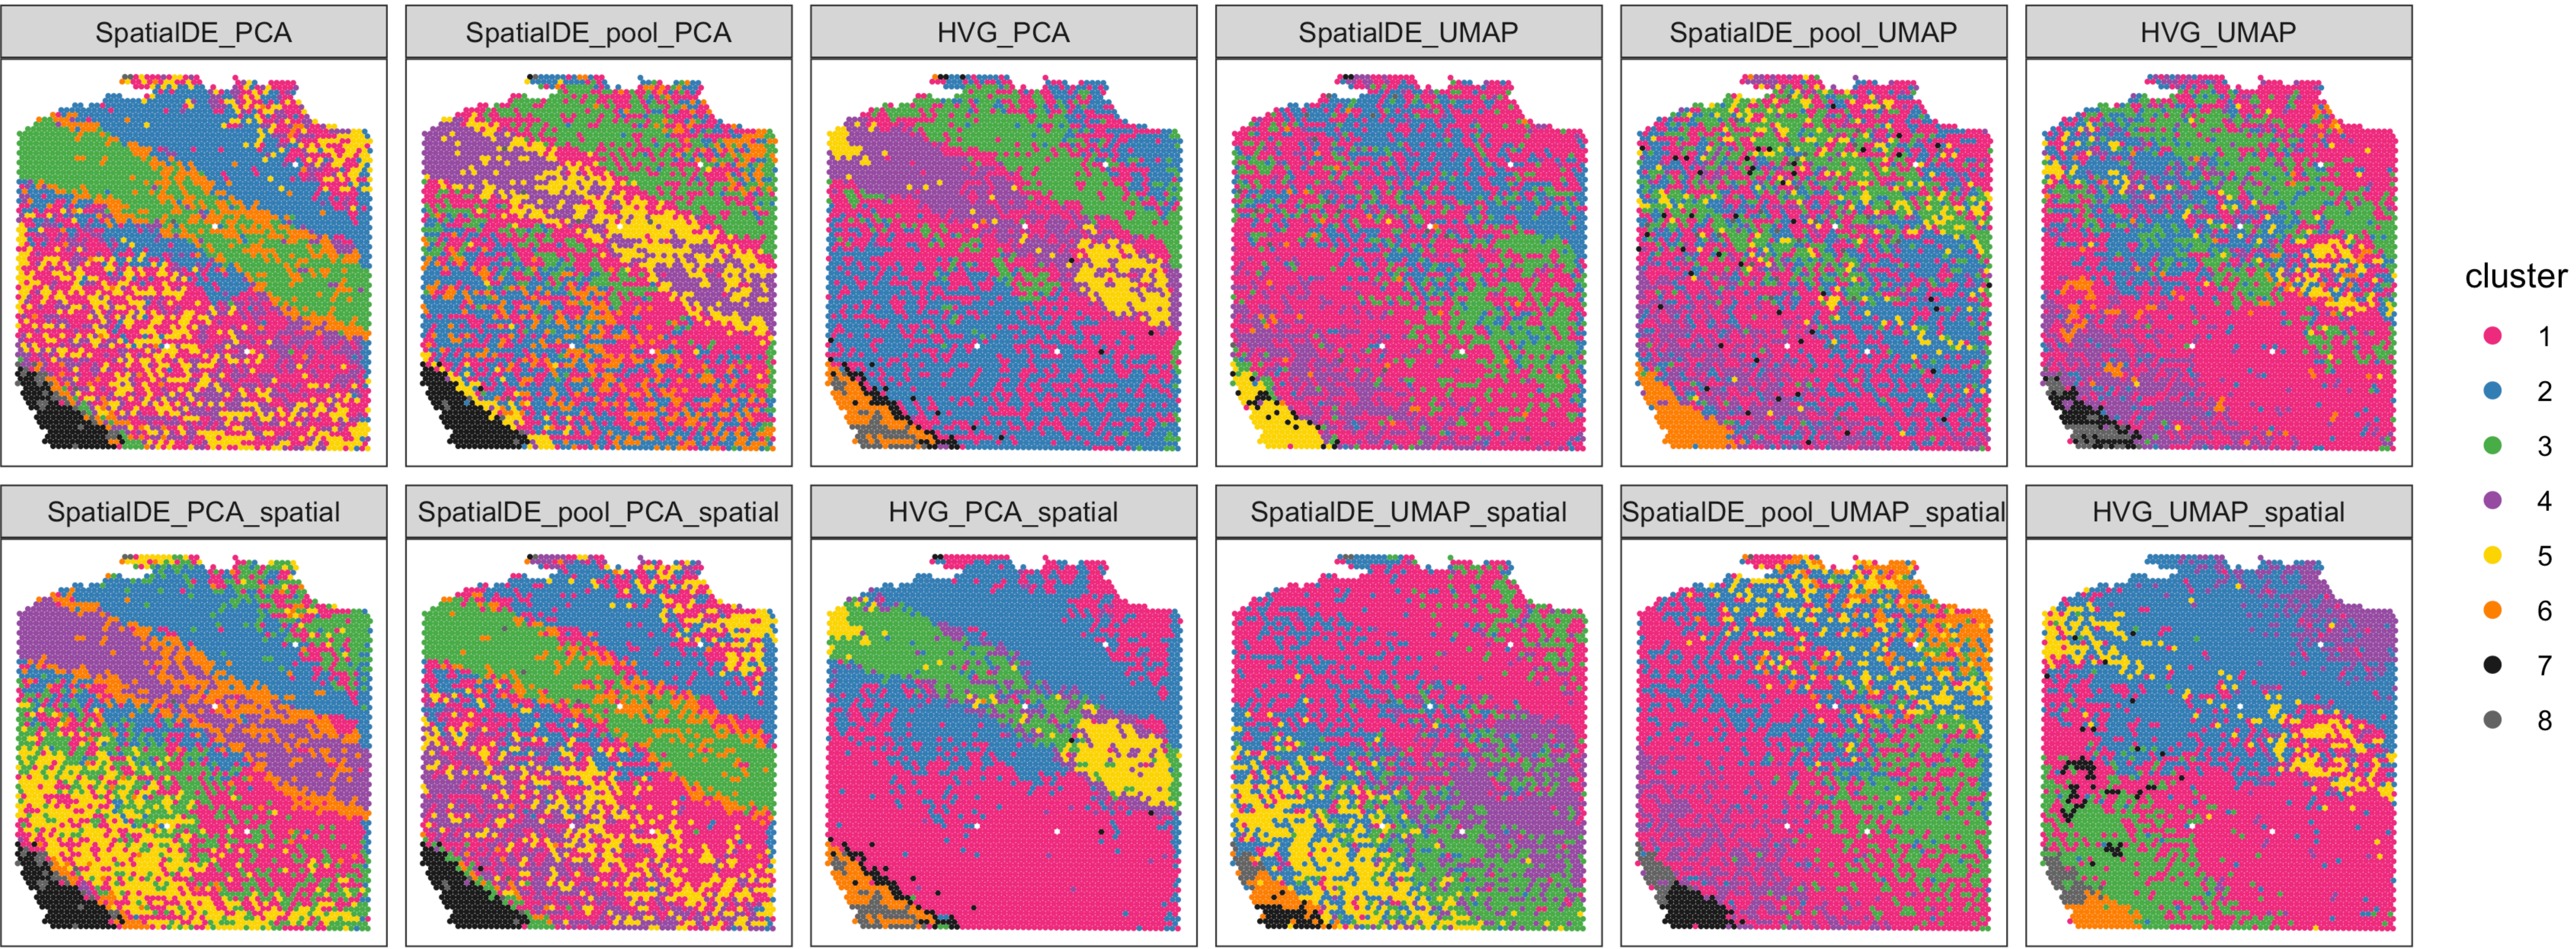



# Sample 151510: Clustering (semi-supervised and markers)

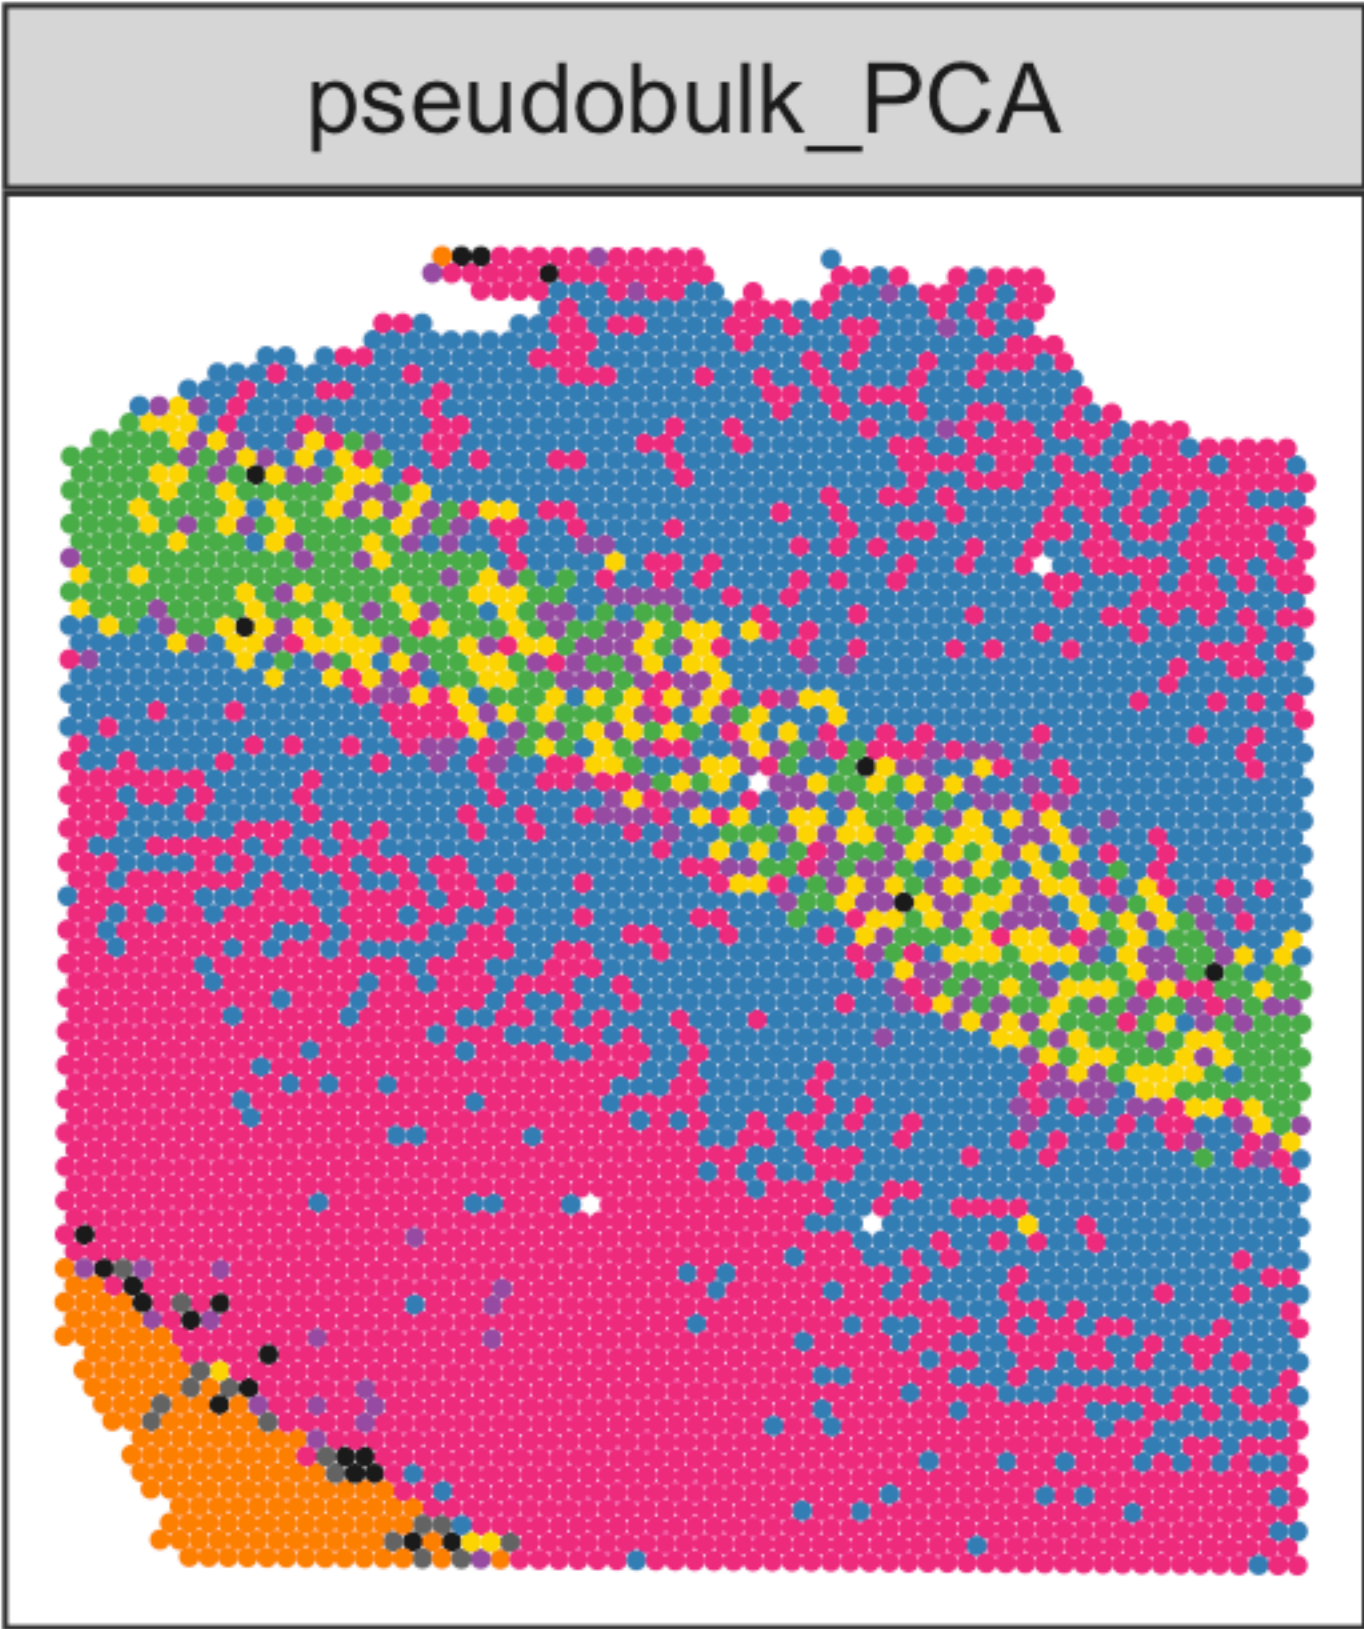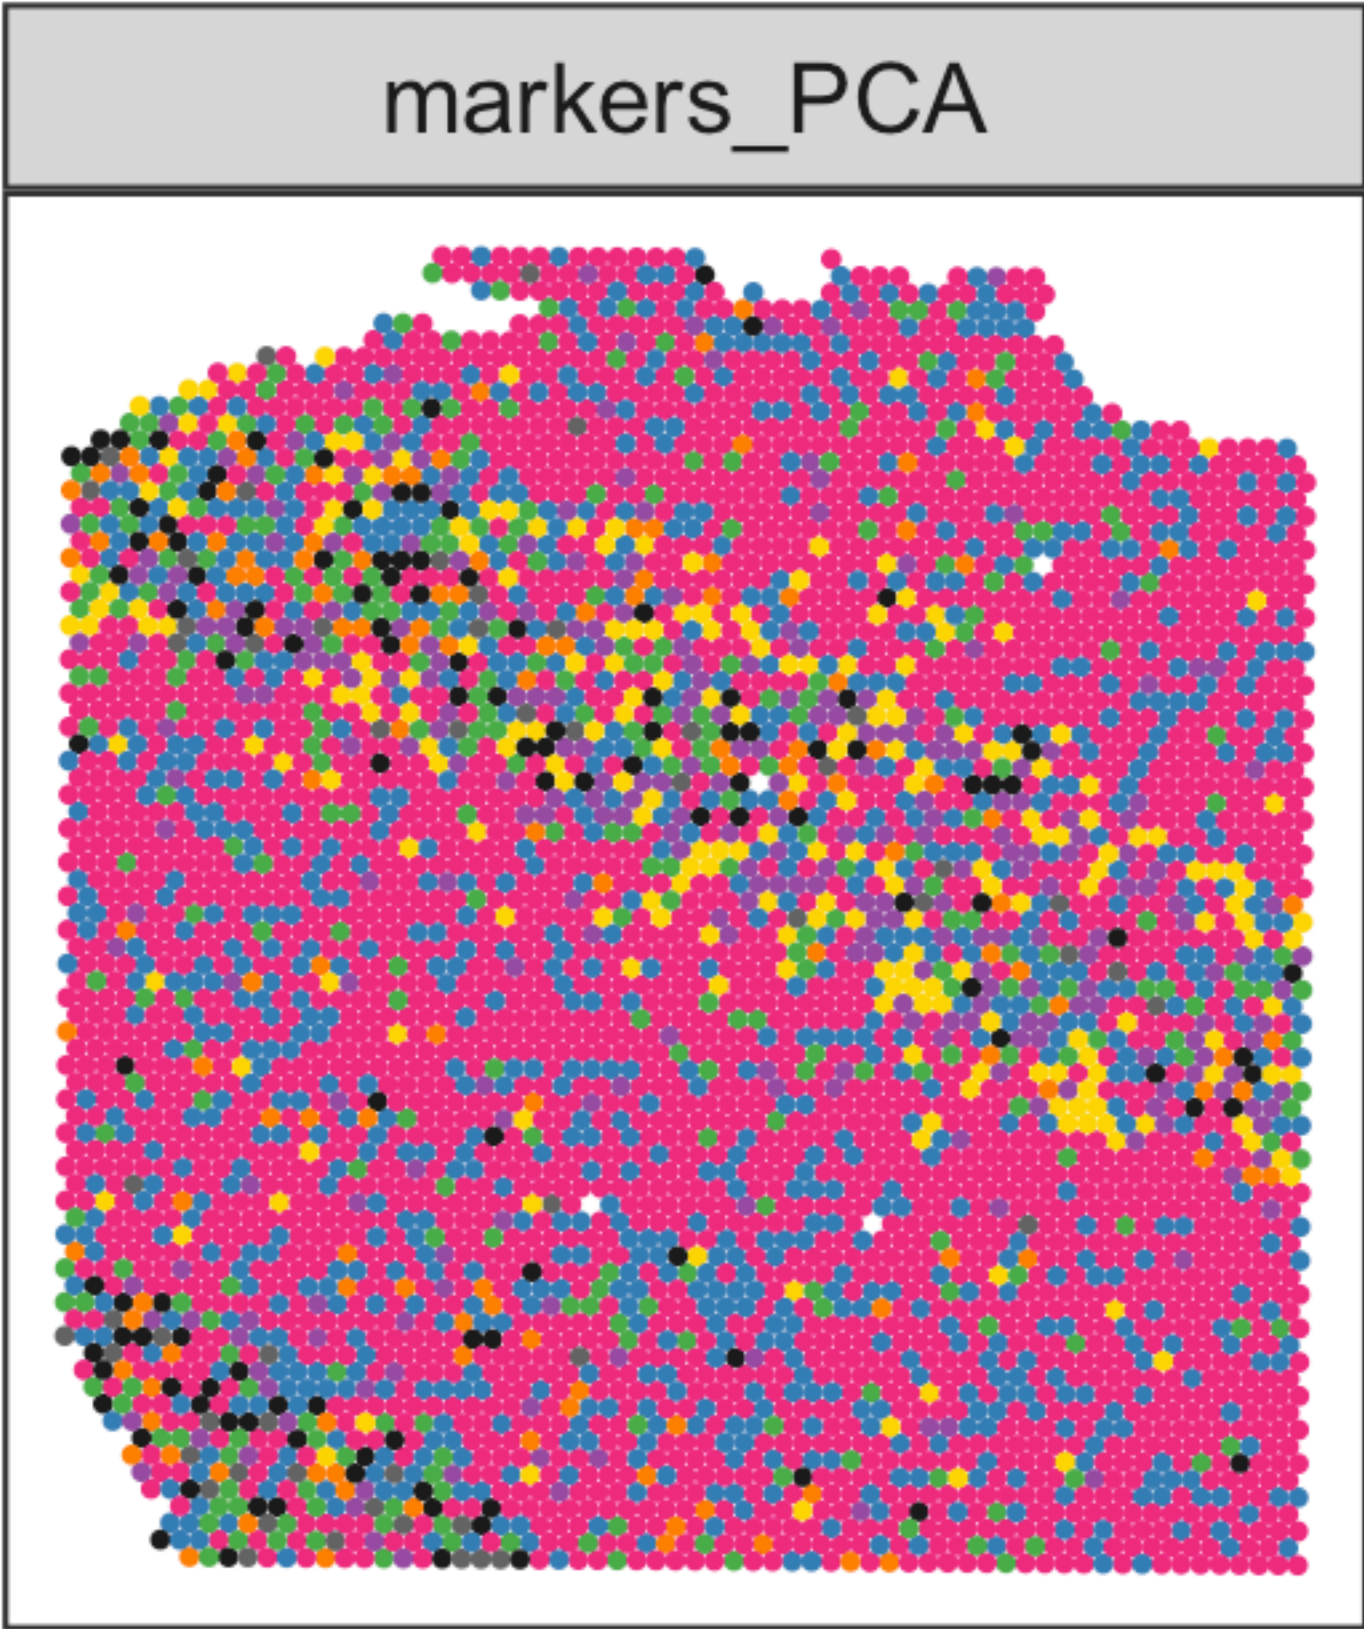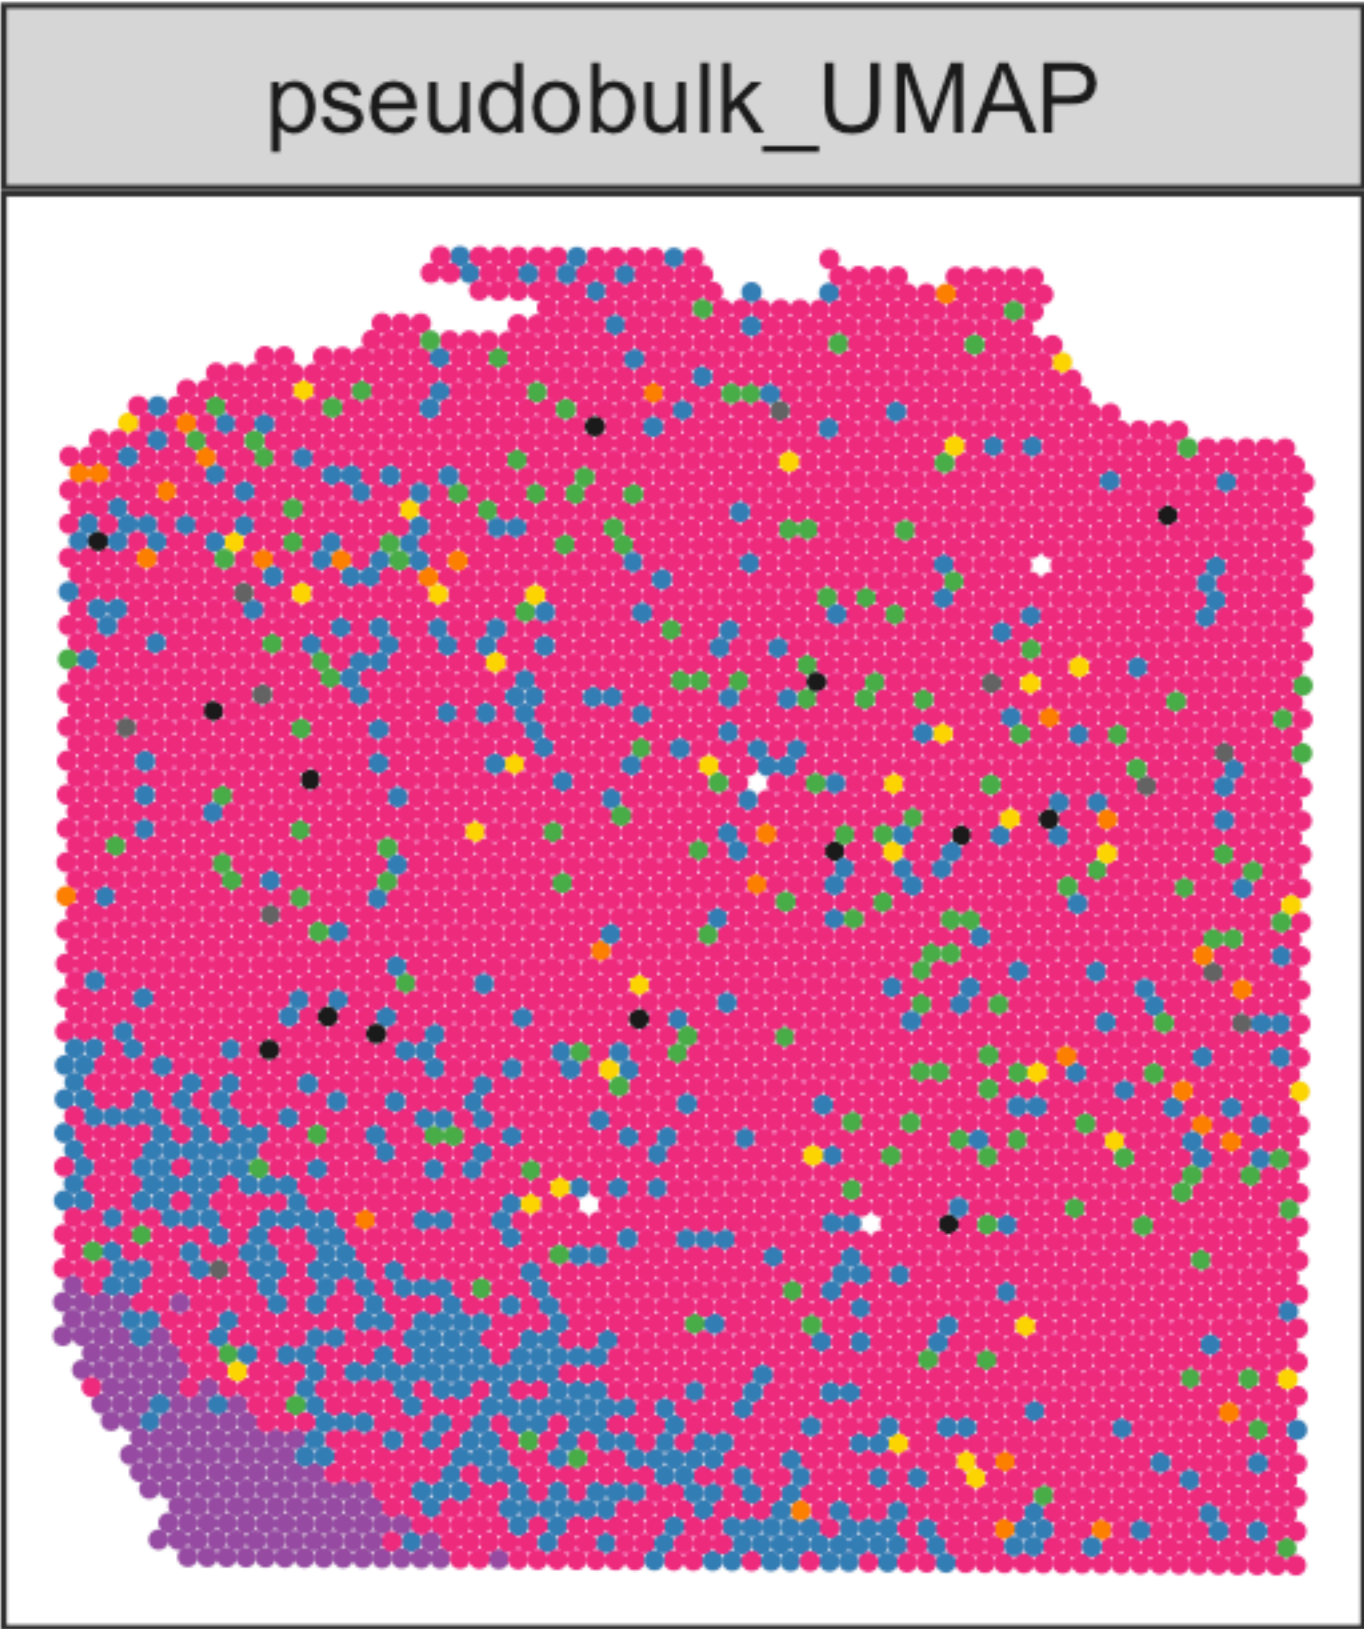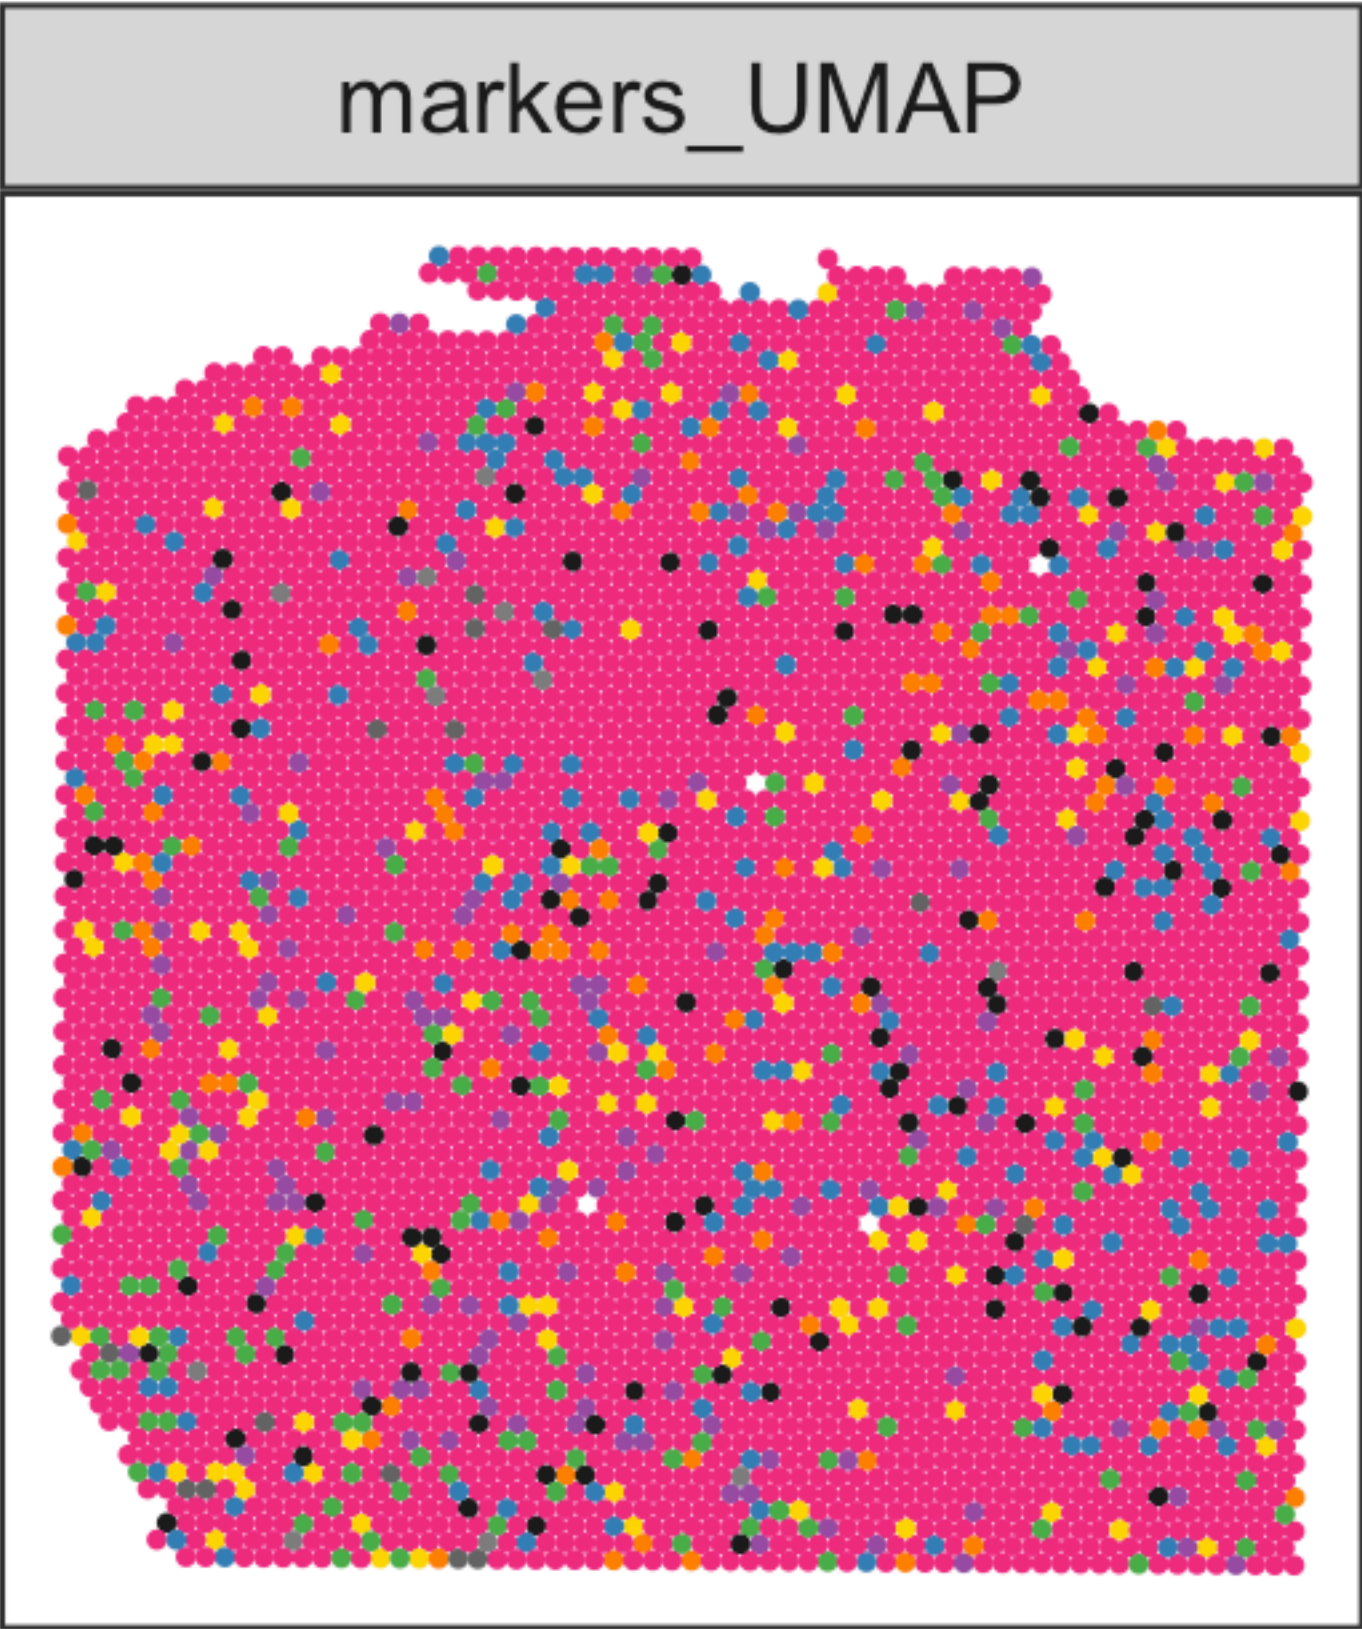

cluster

- 1
- 2
- 3
- 4
- 5
- 6
- 7
- 8
- 9

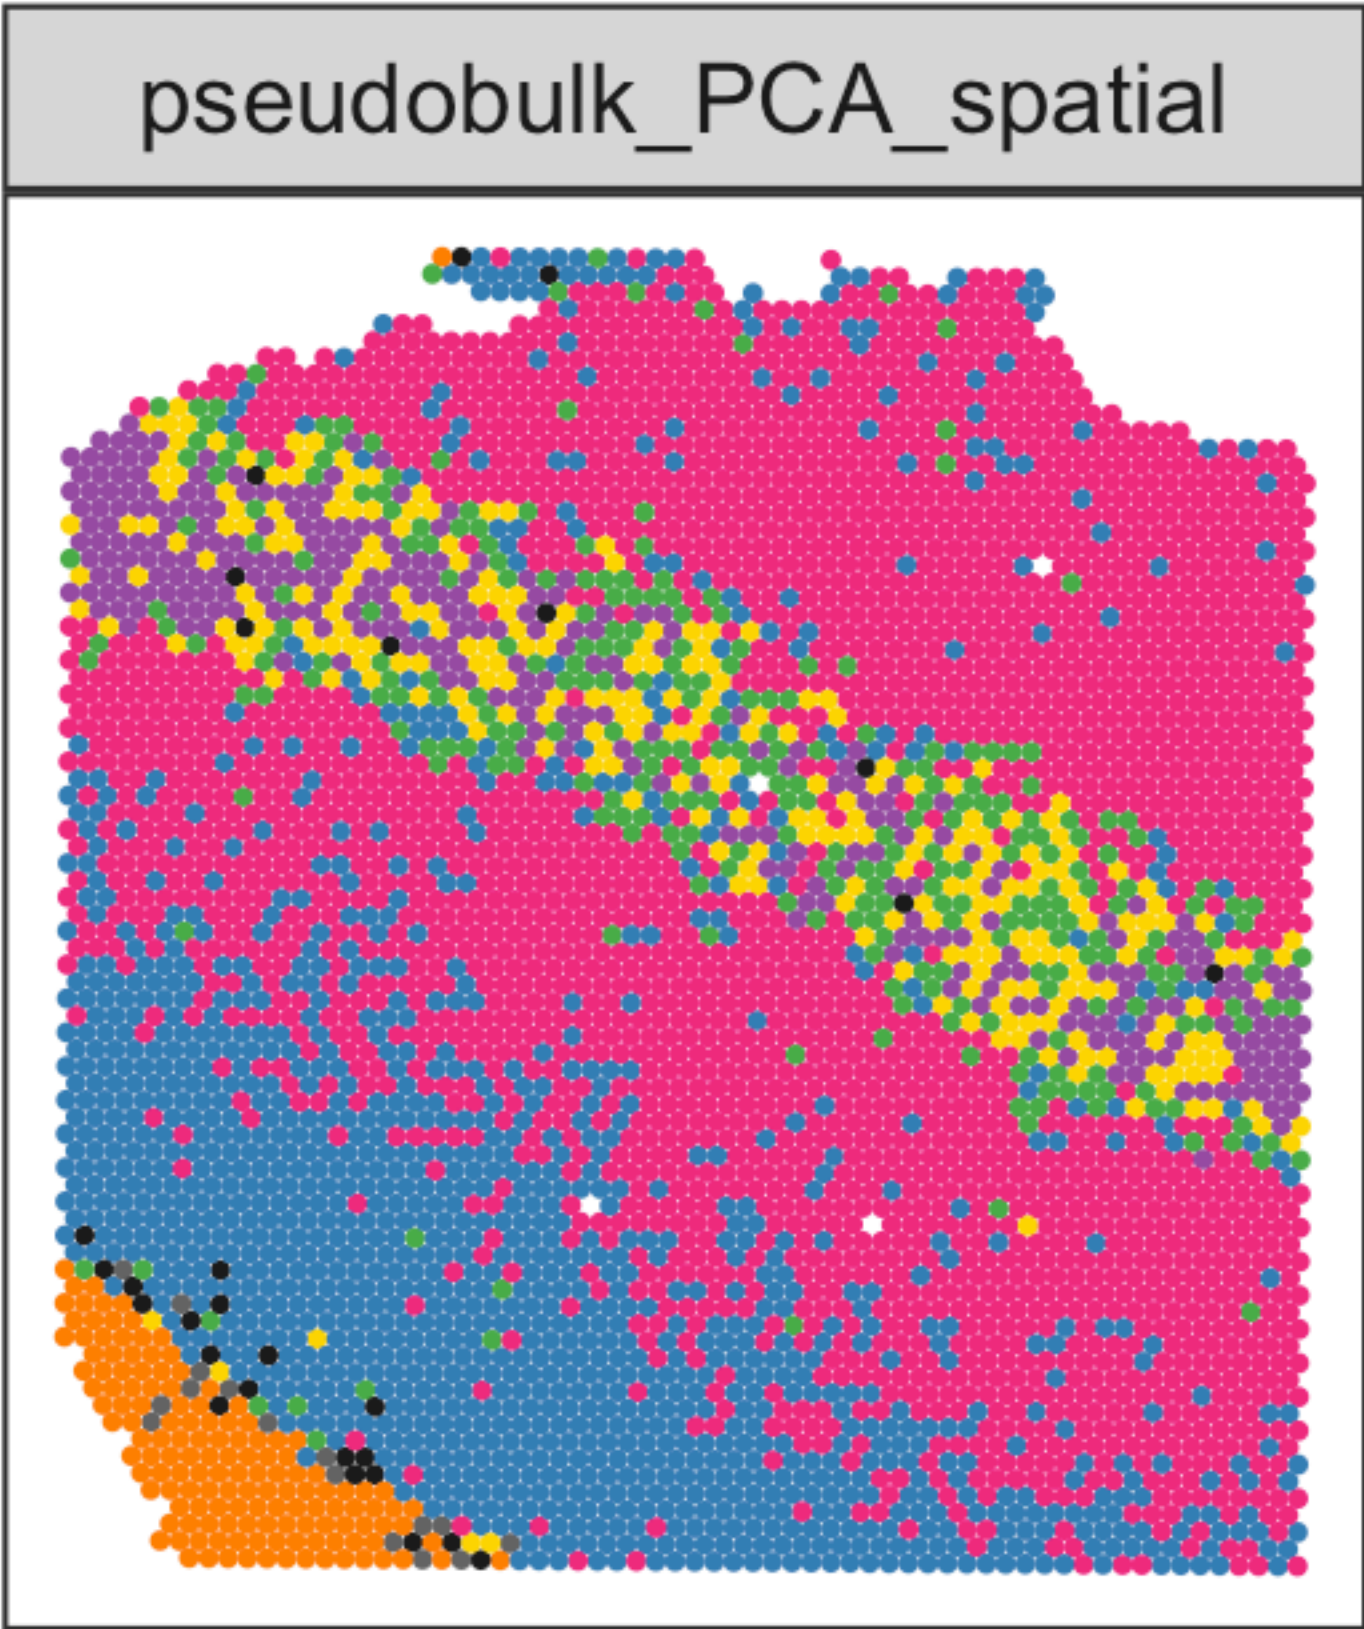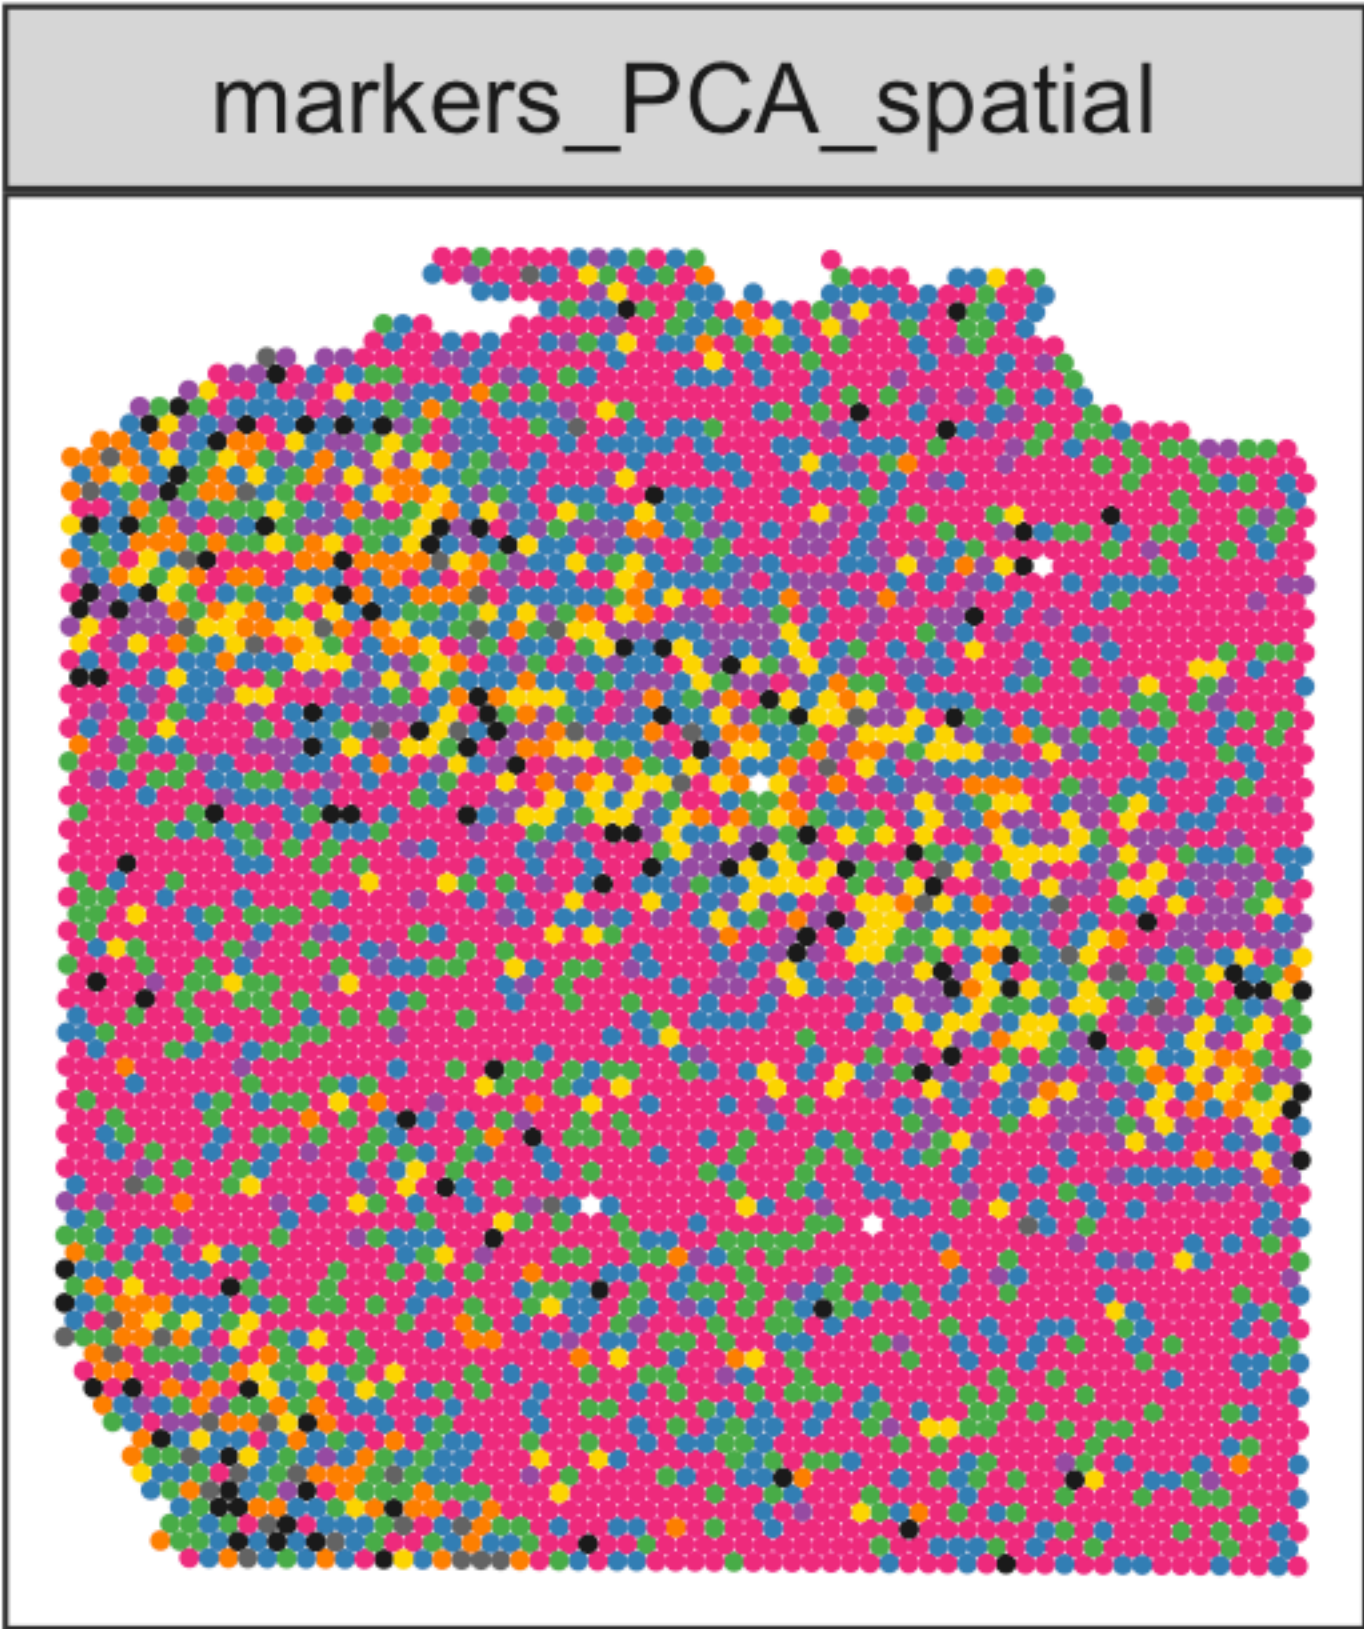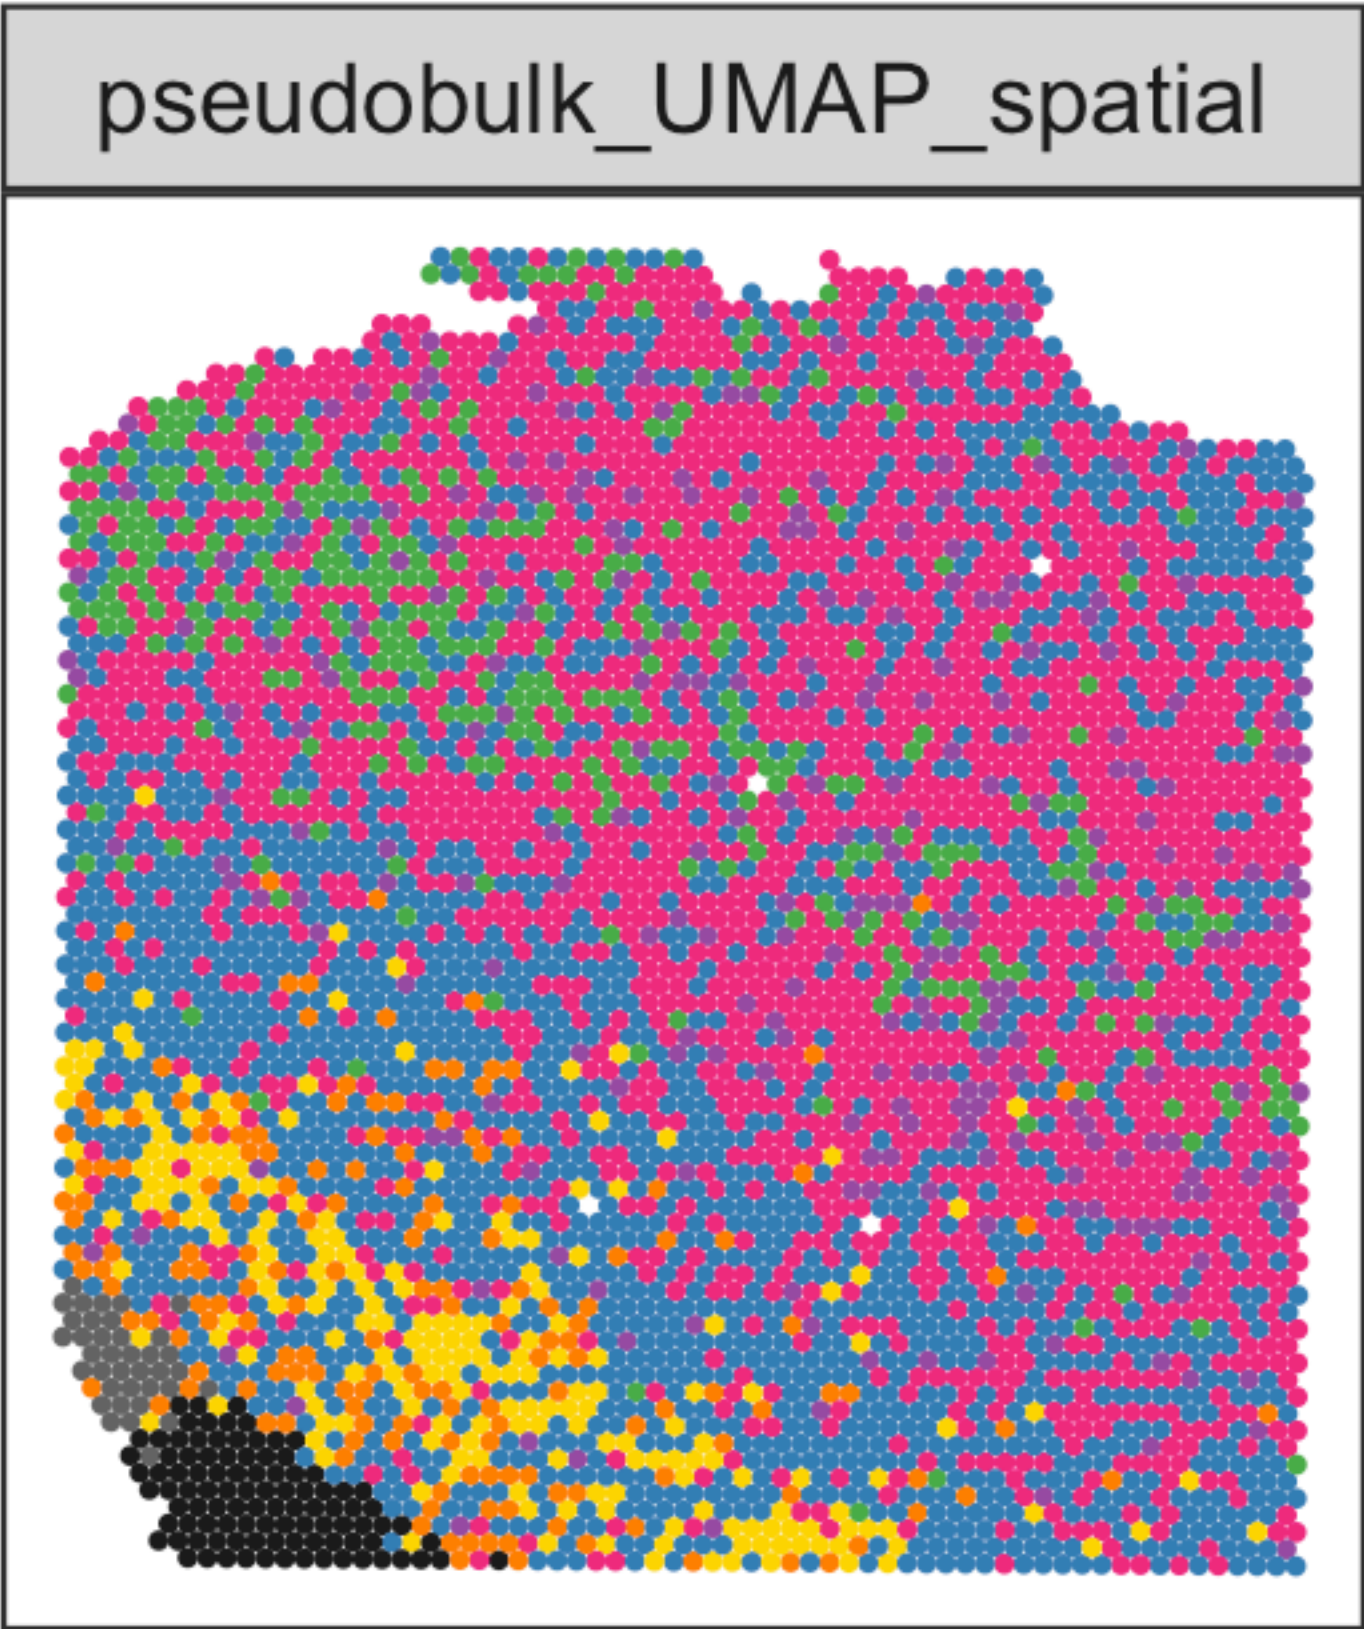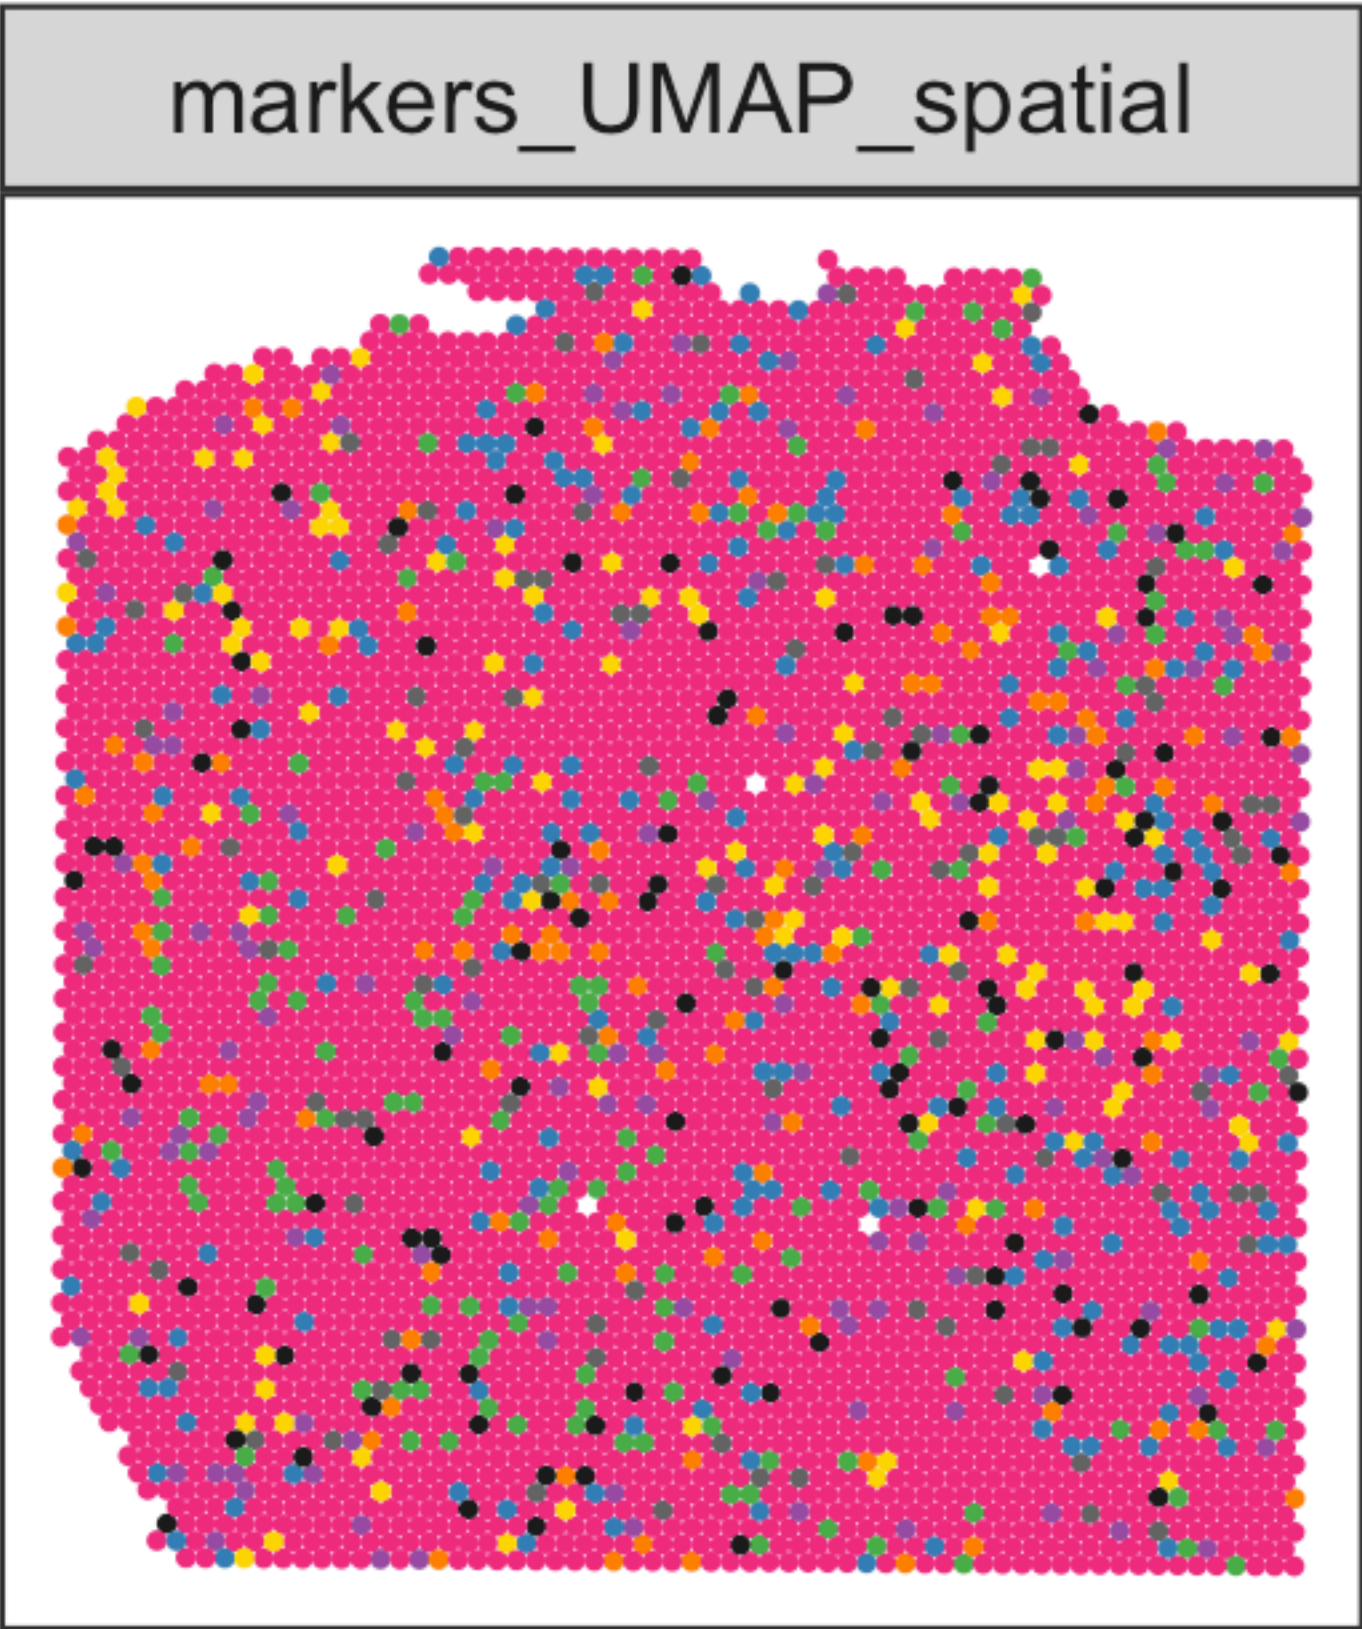



# Sample 151669: Clustering (unsupervised)

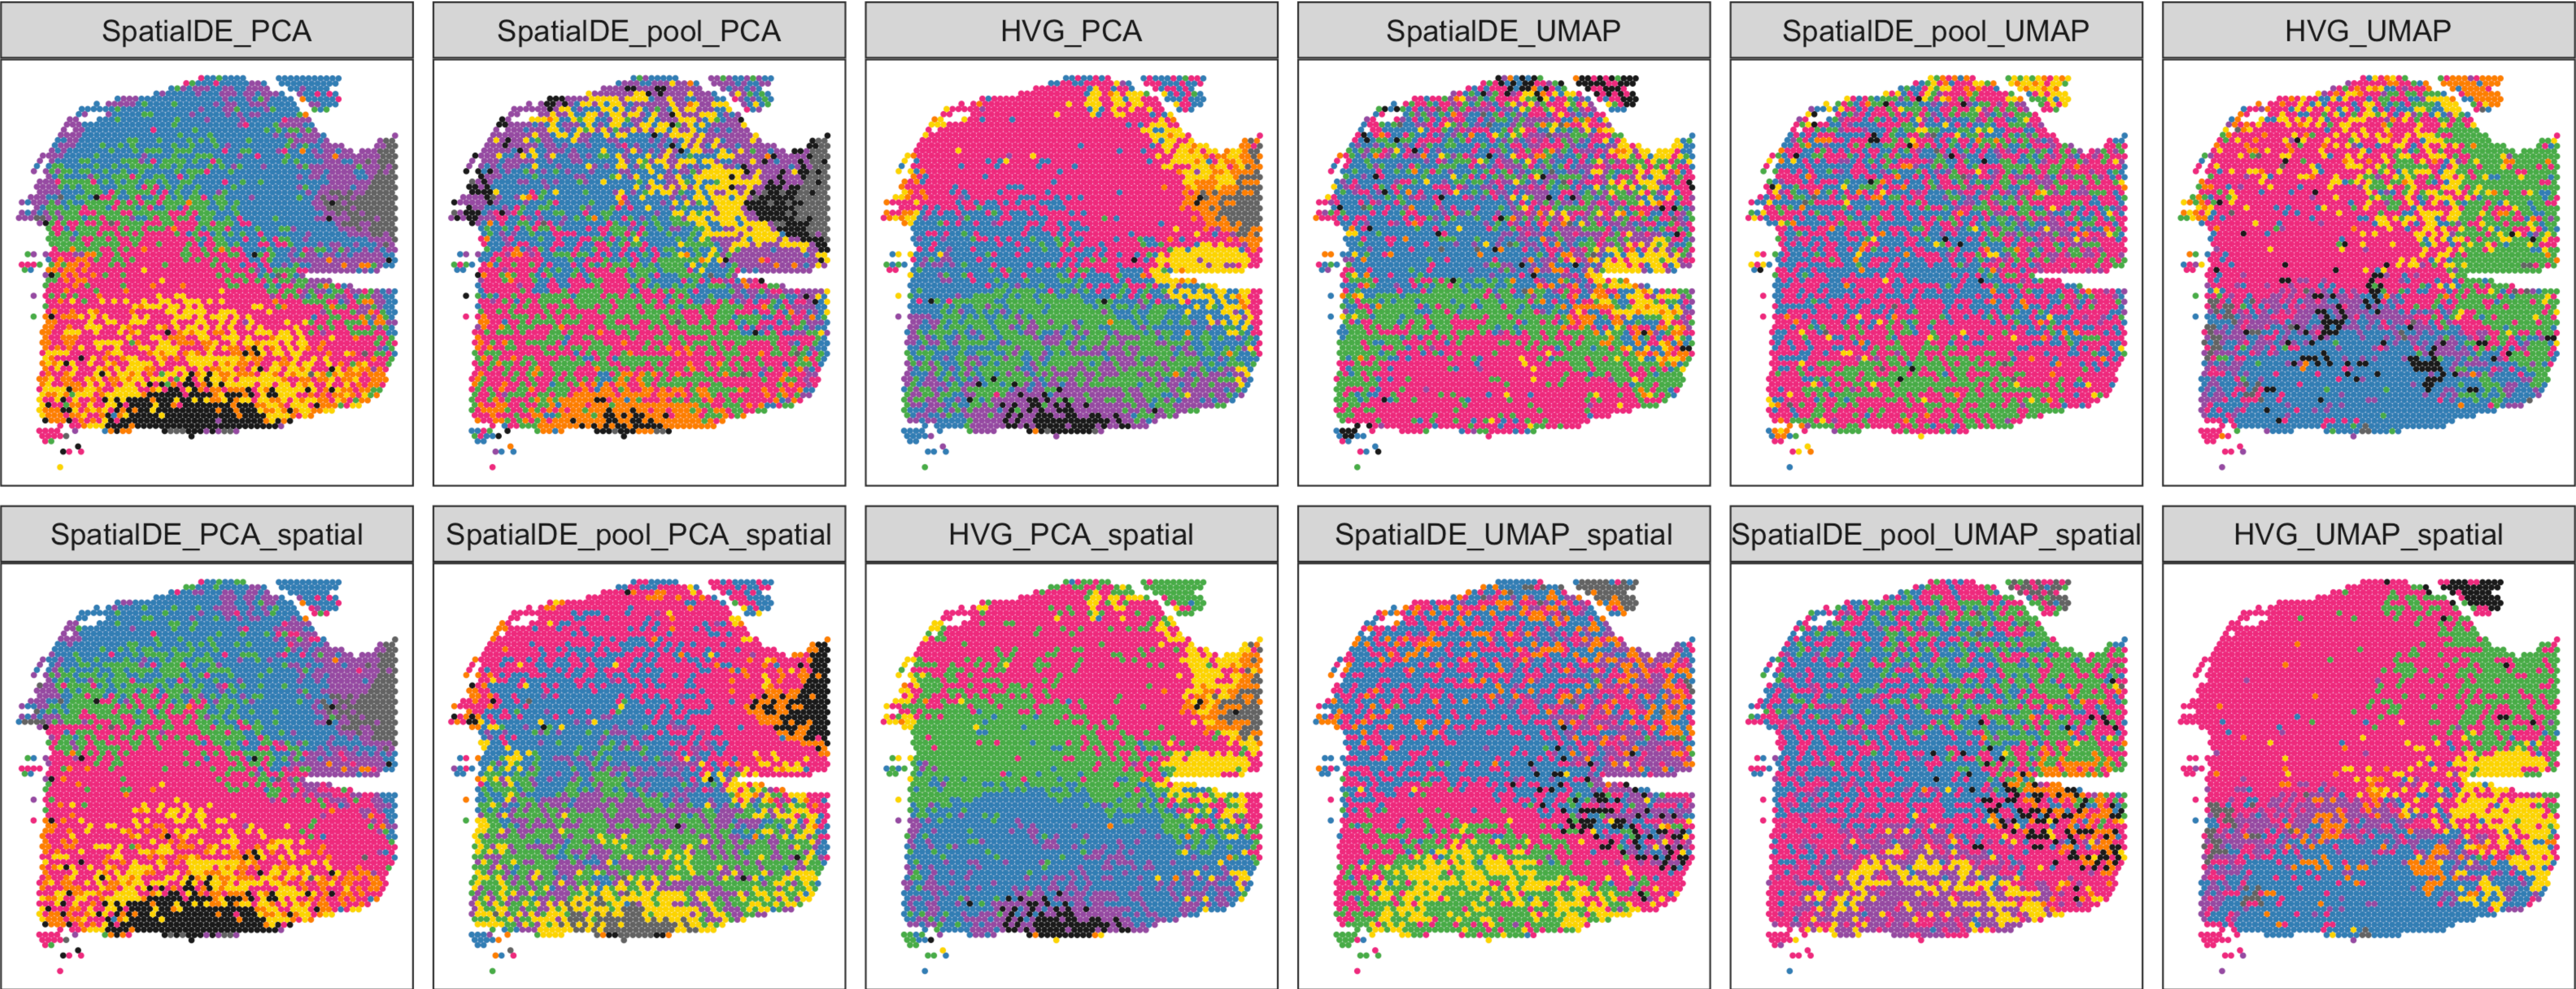



# Sample 151669: Clustering (semi-supervised and markers)

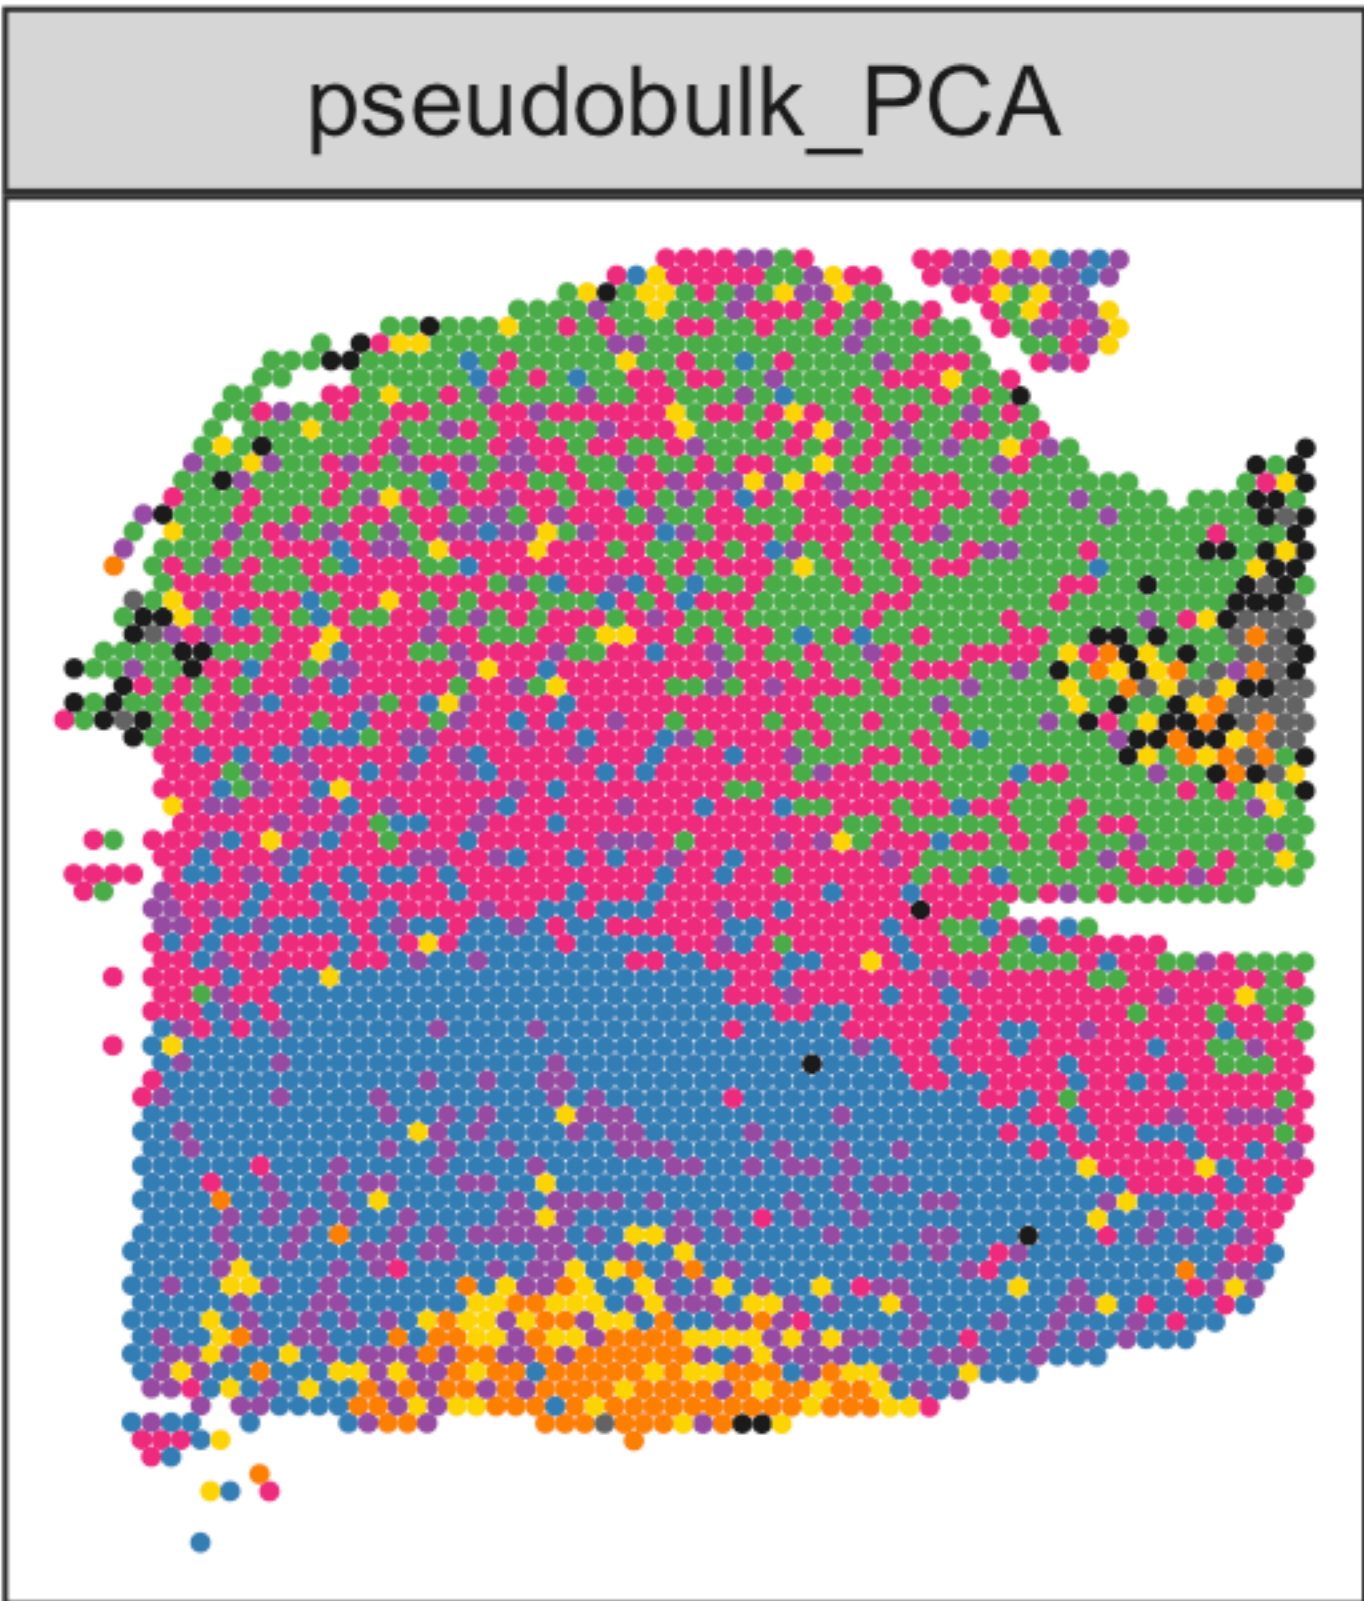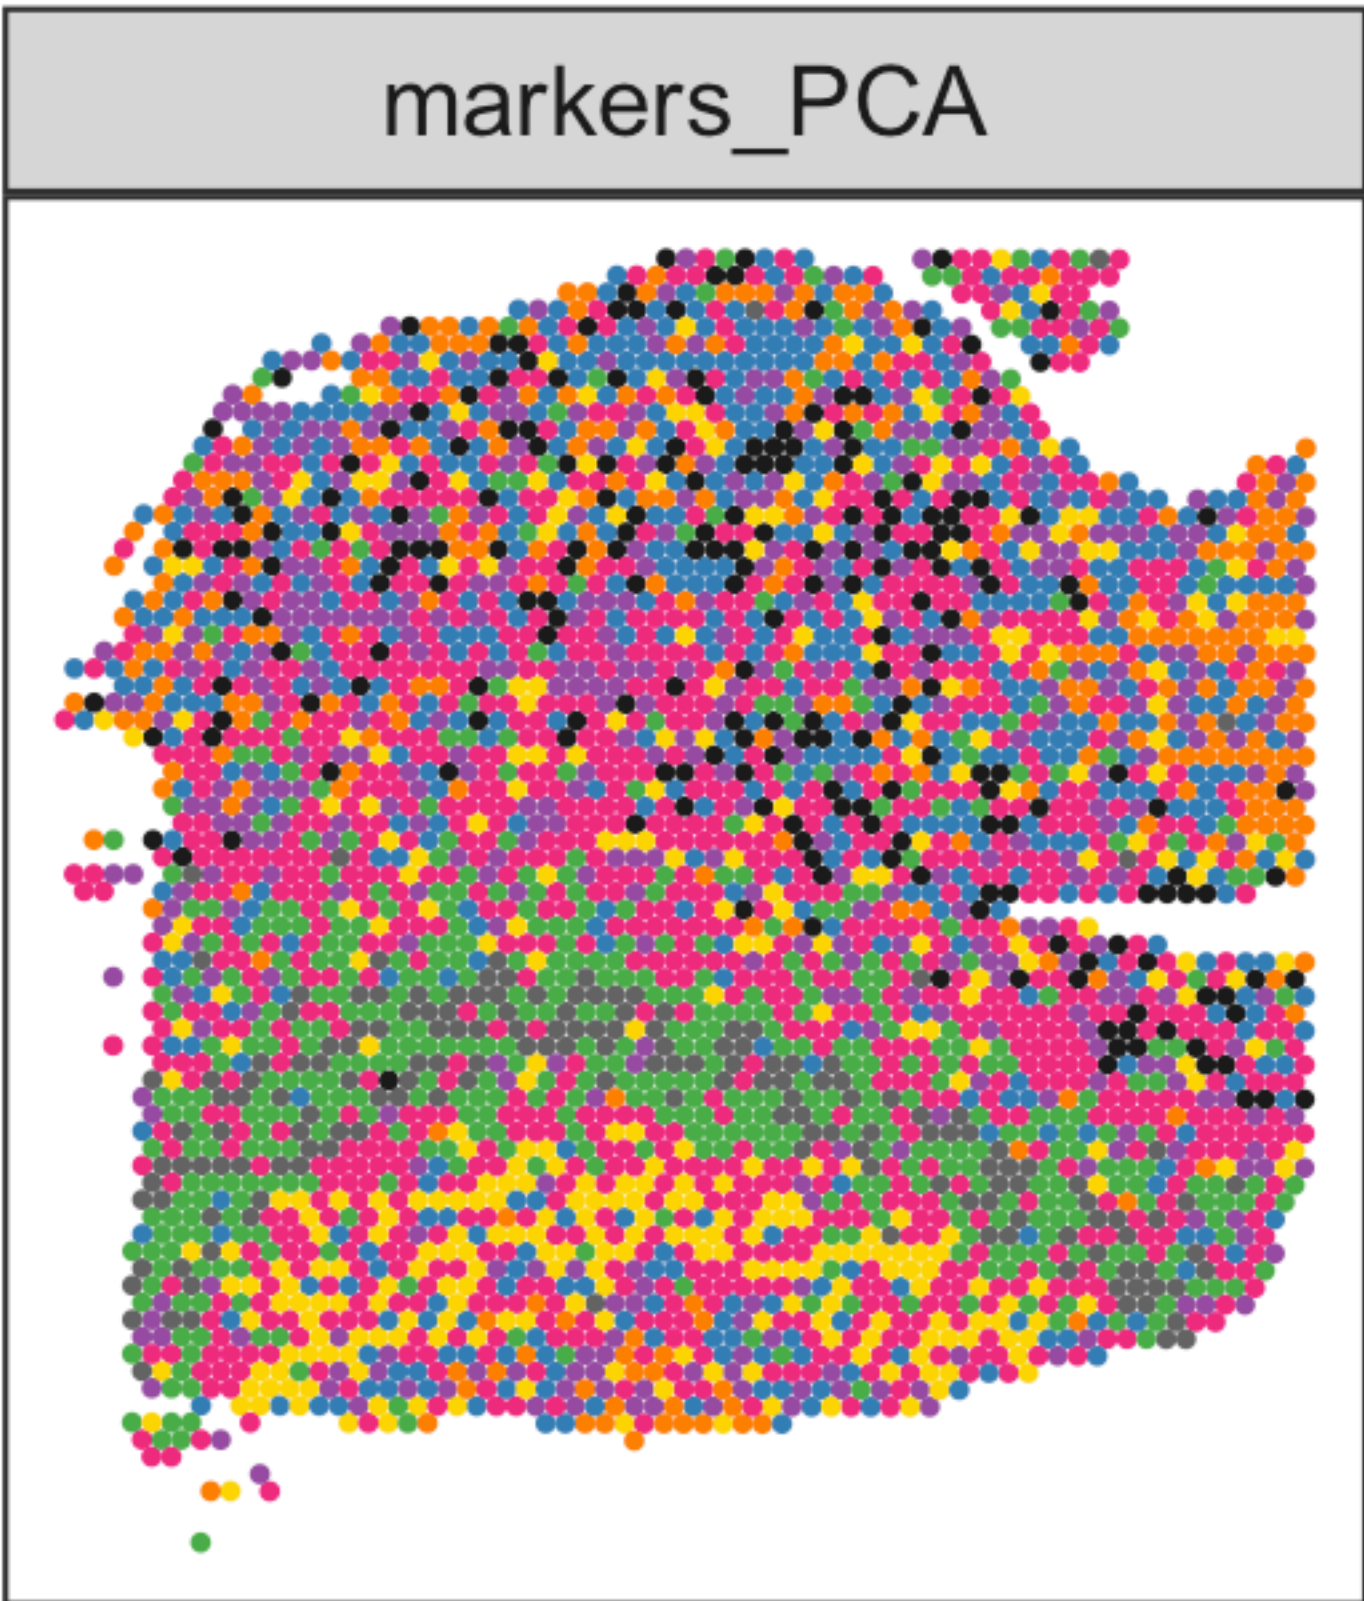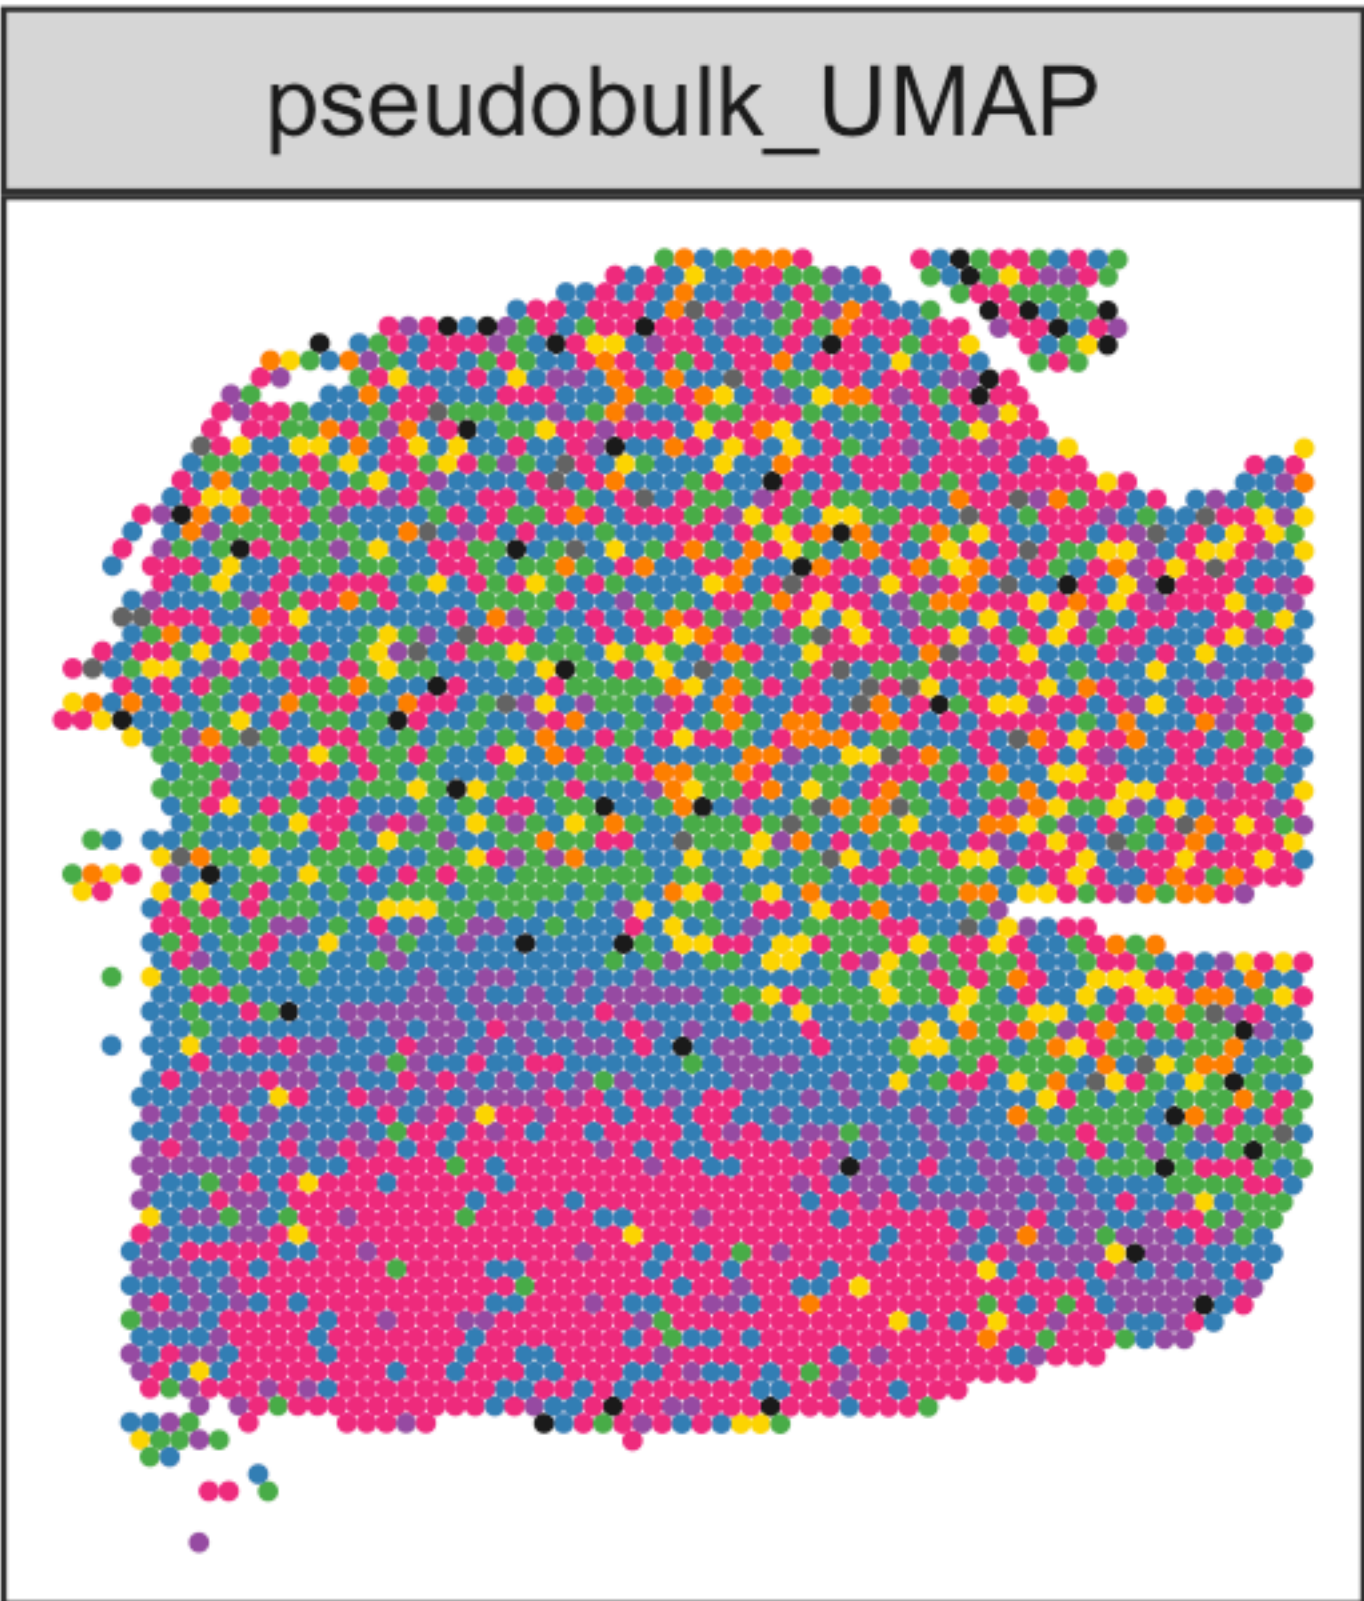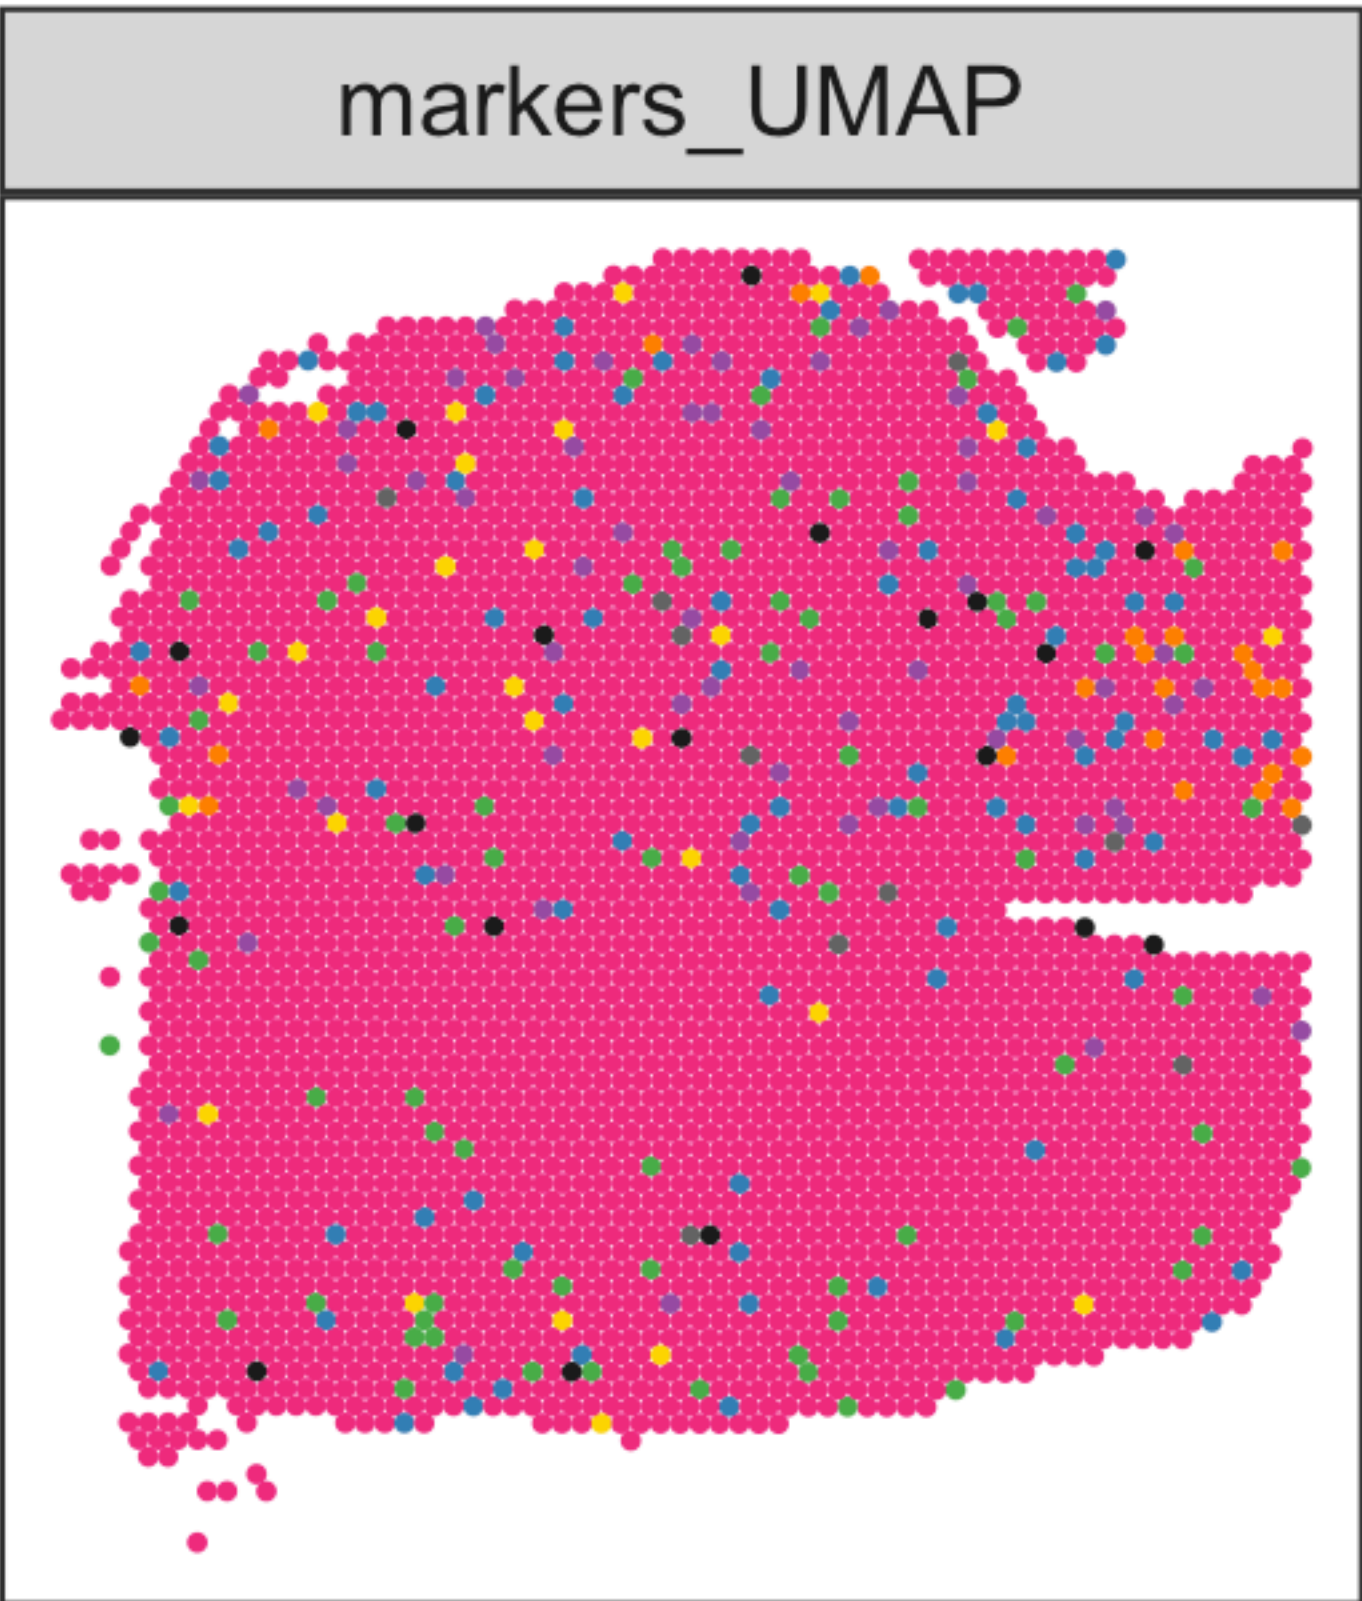

cluster

- 1
- 2
- 3
- 4
- 5
- 6
- 7
- 8

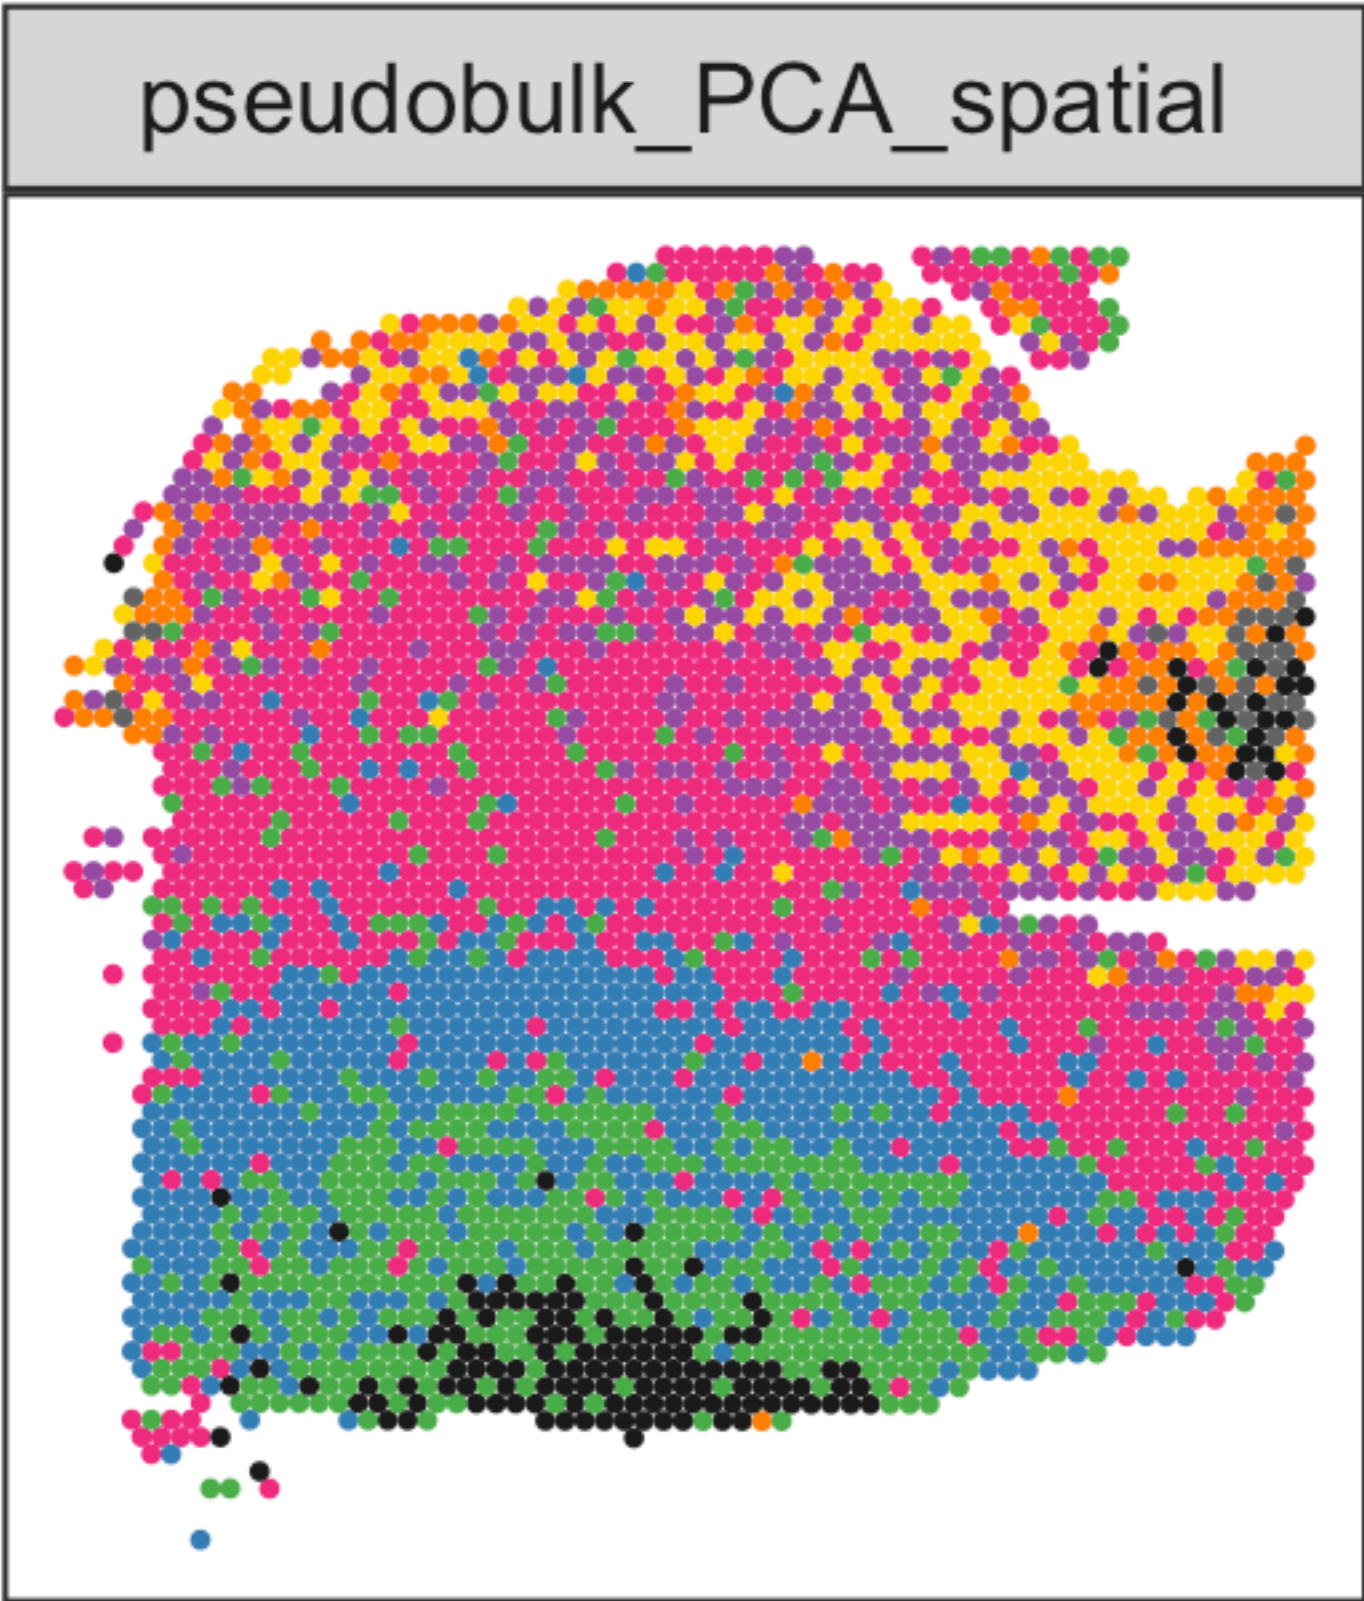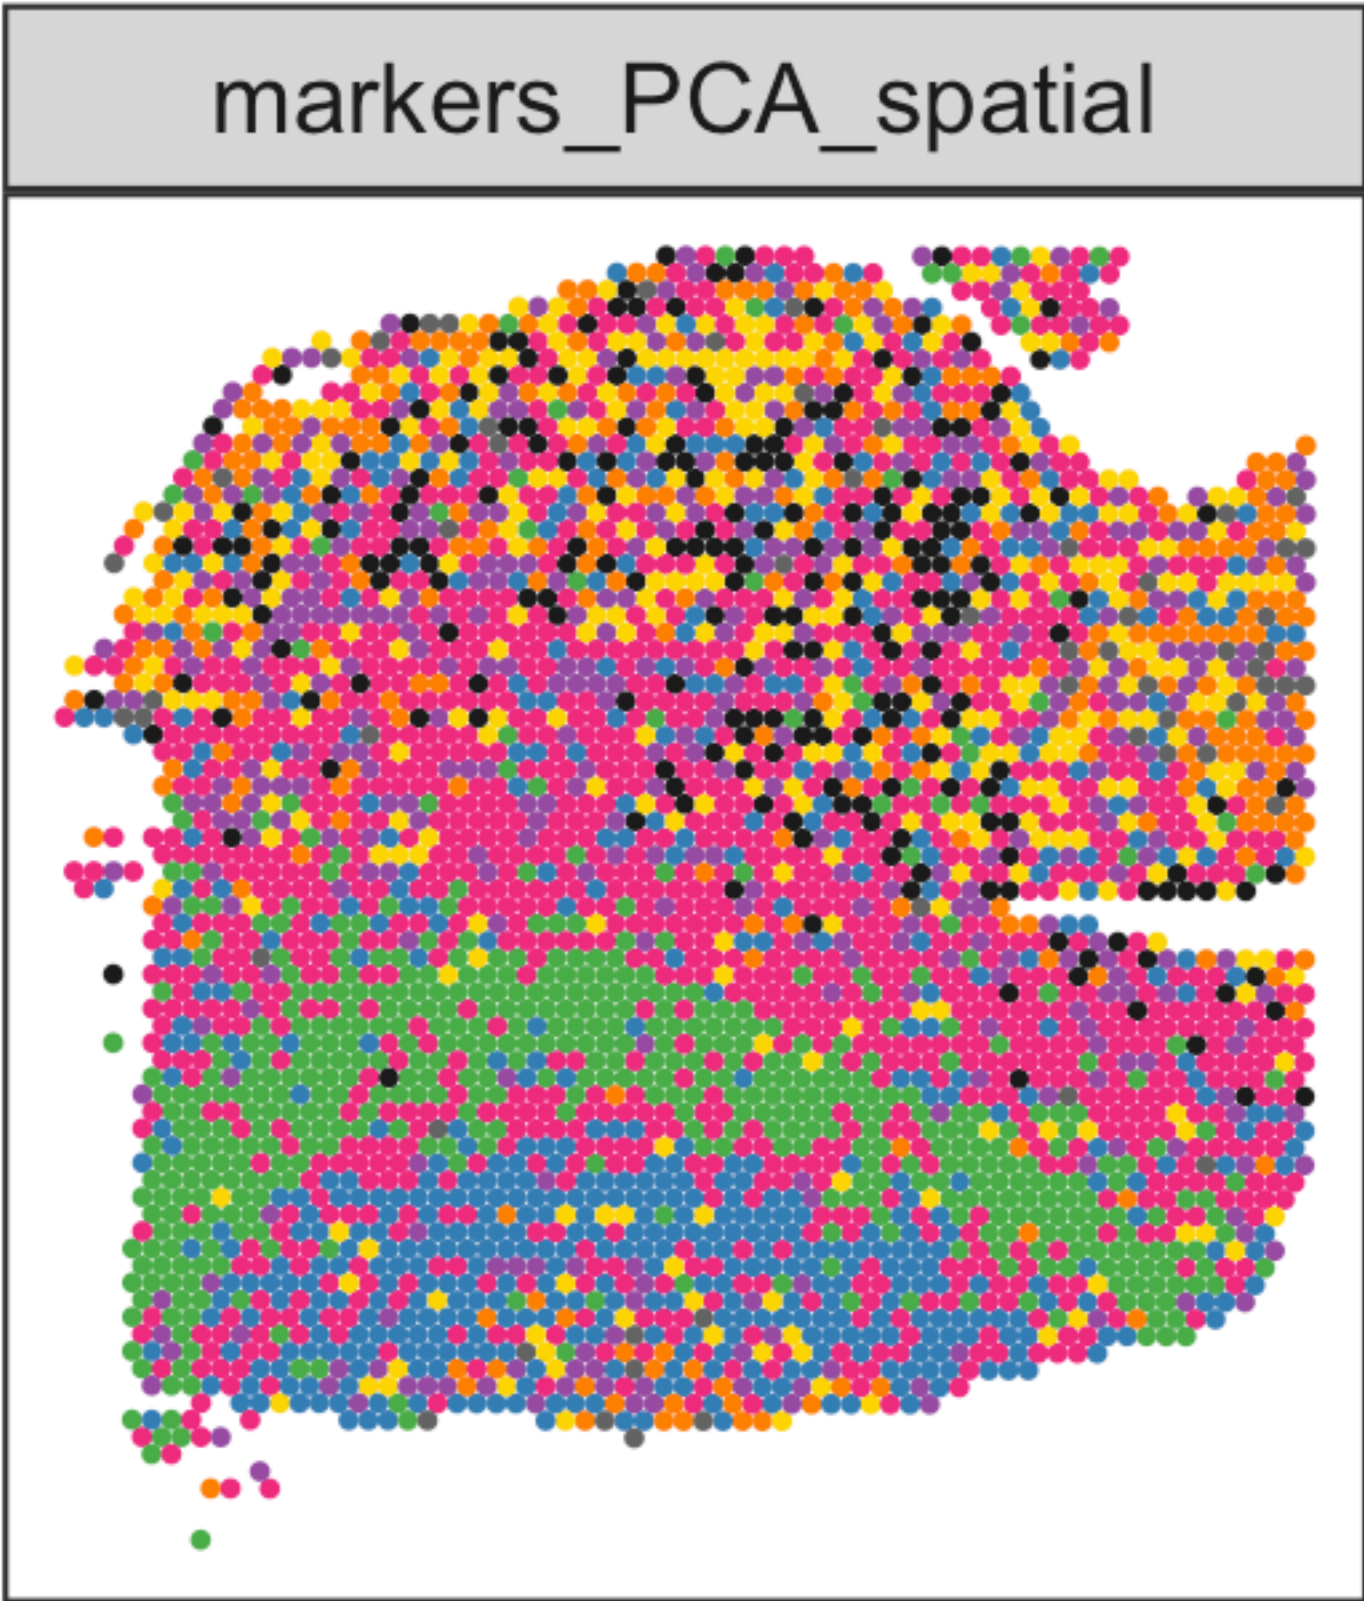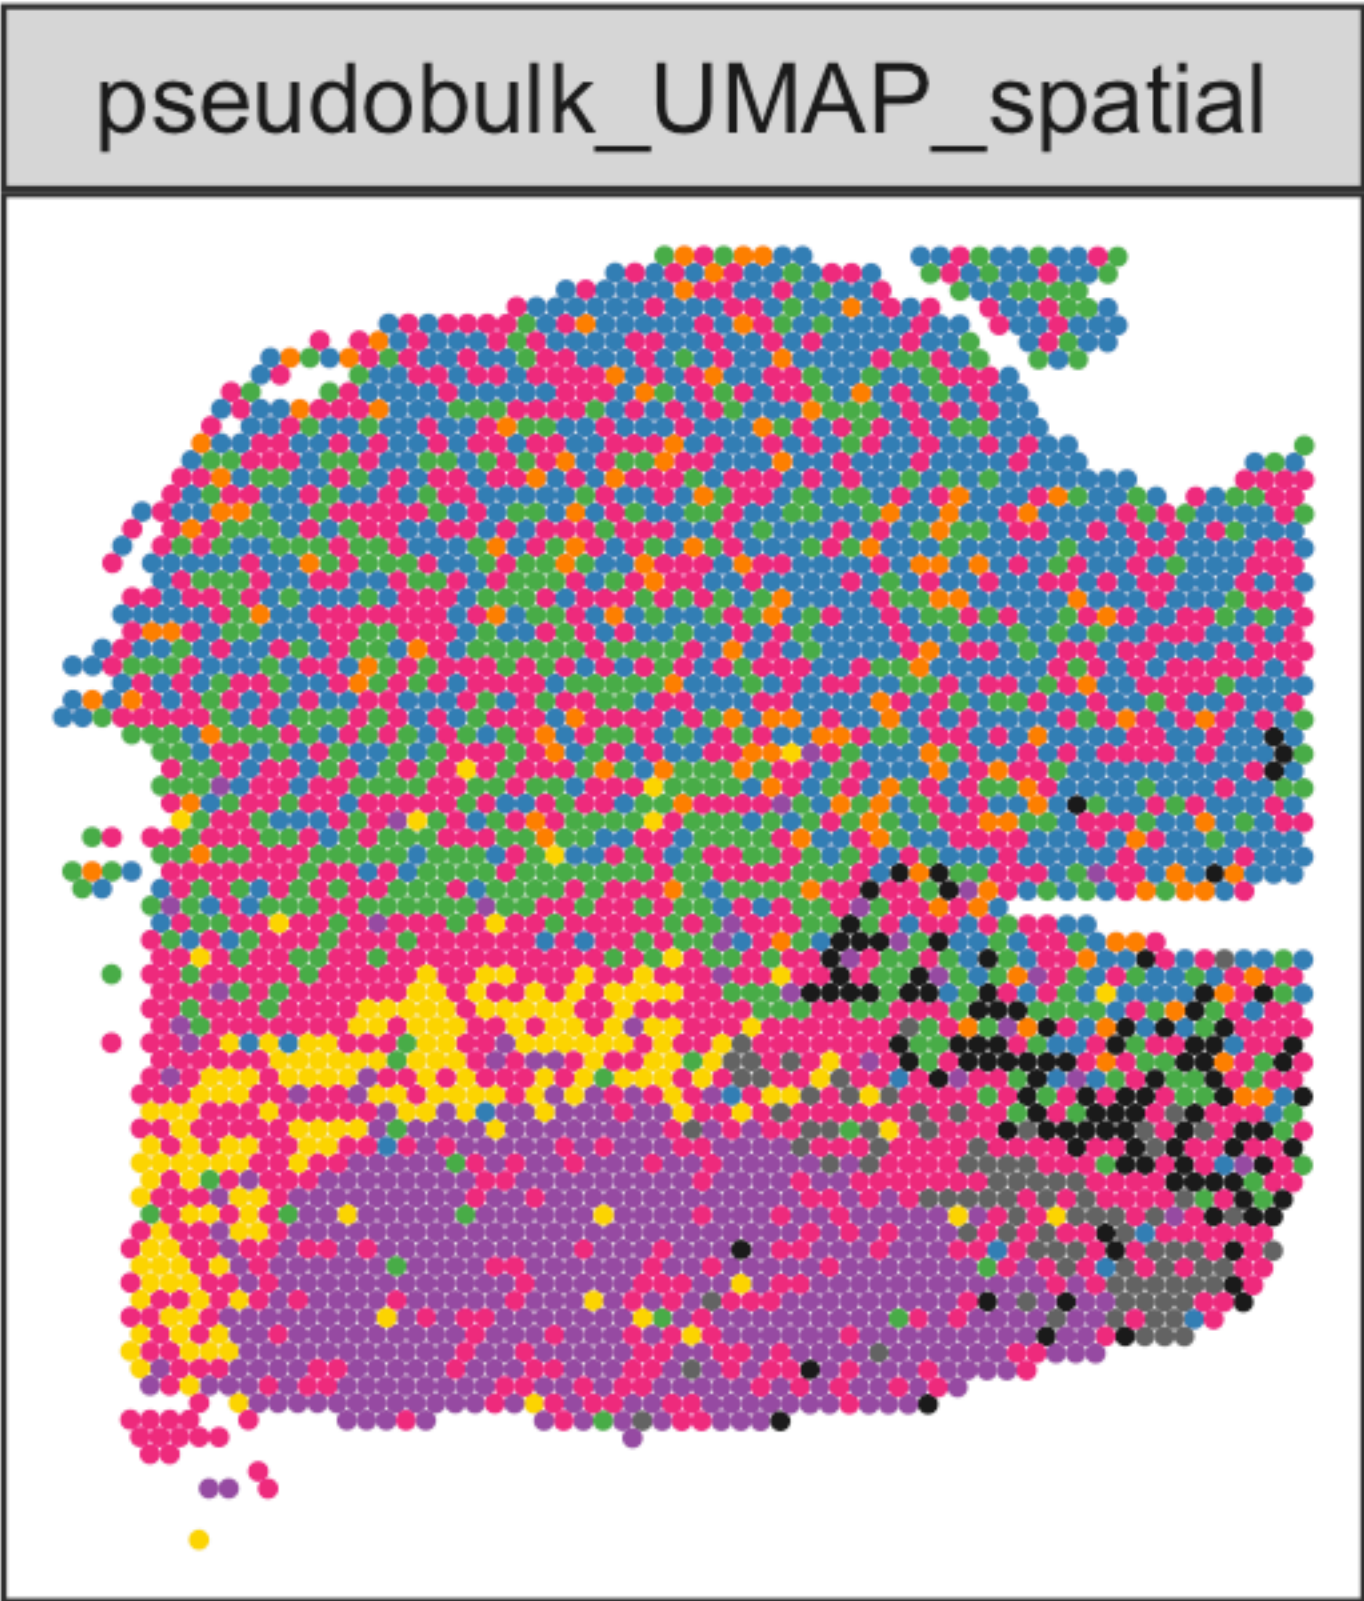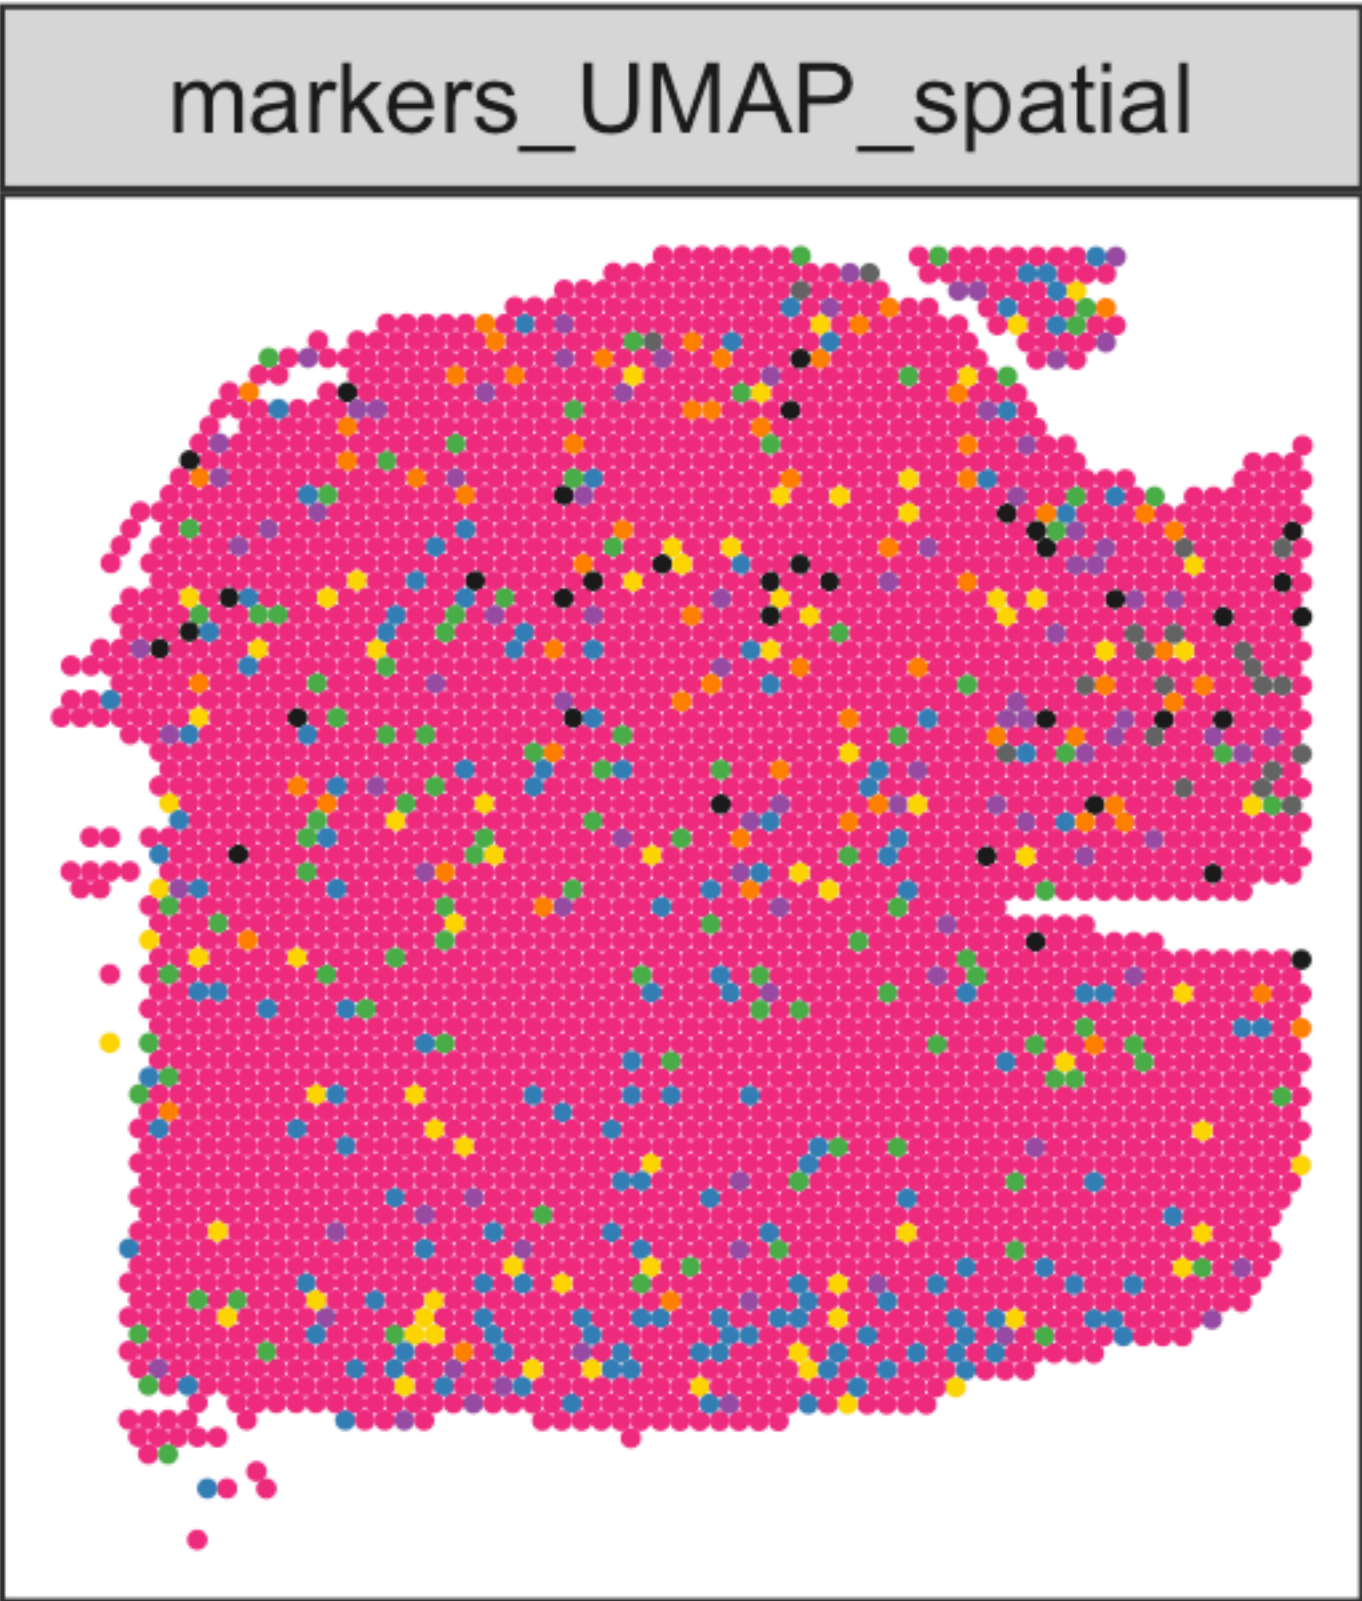



# Sample 151670: Clustering (unsupervised)

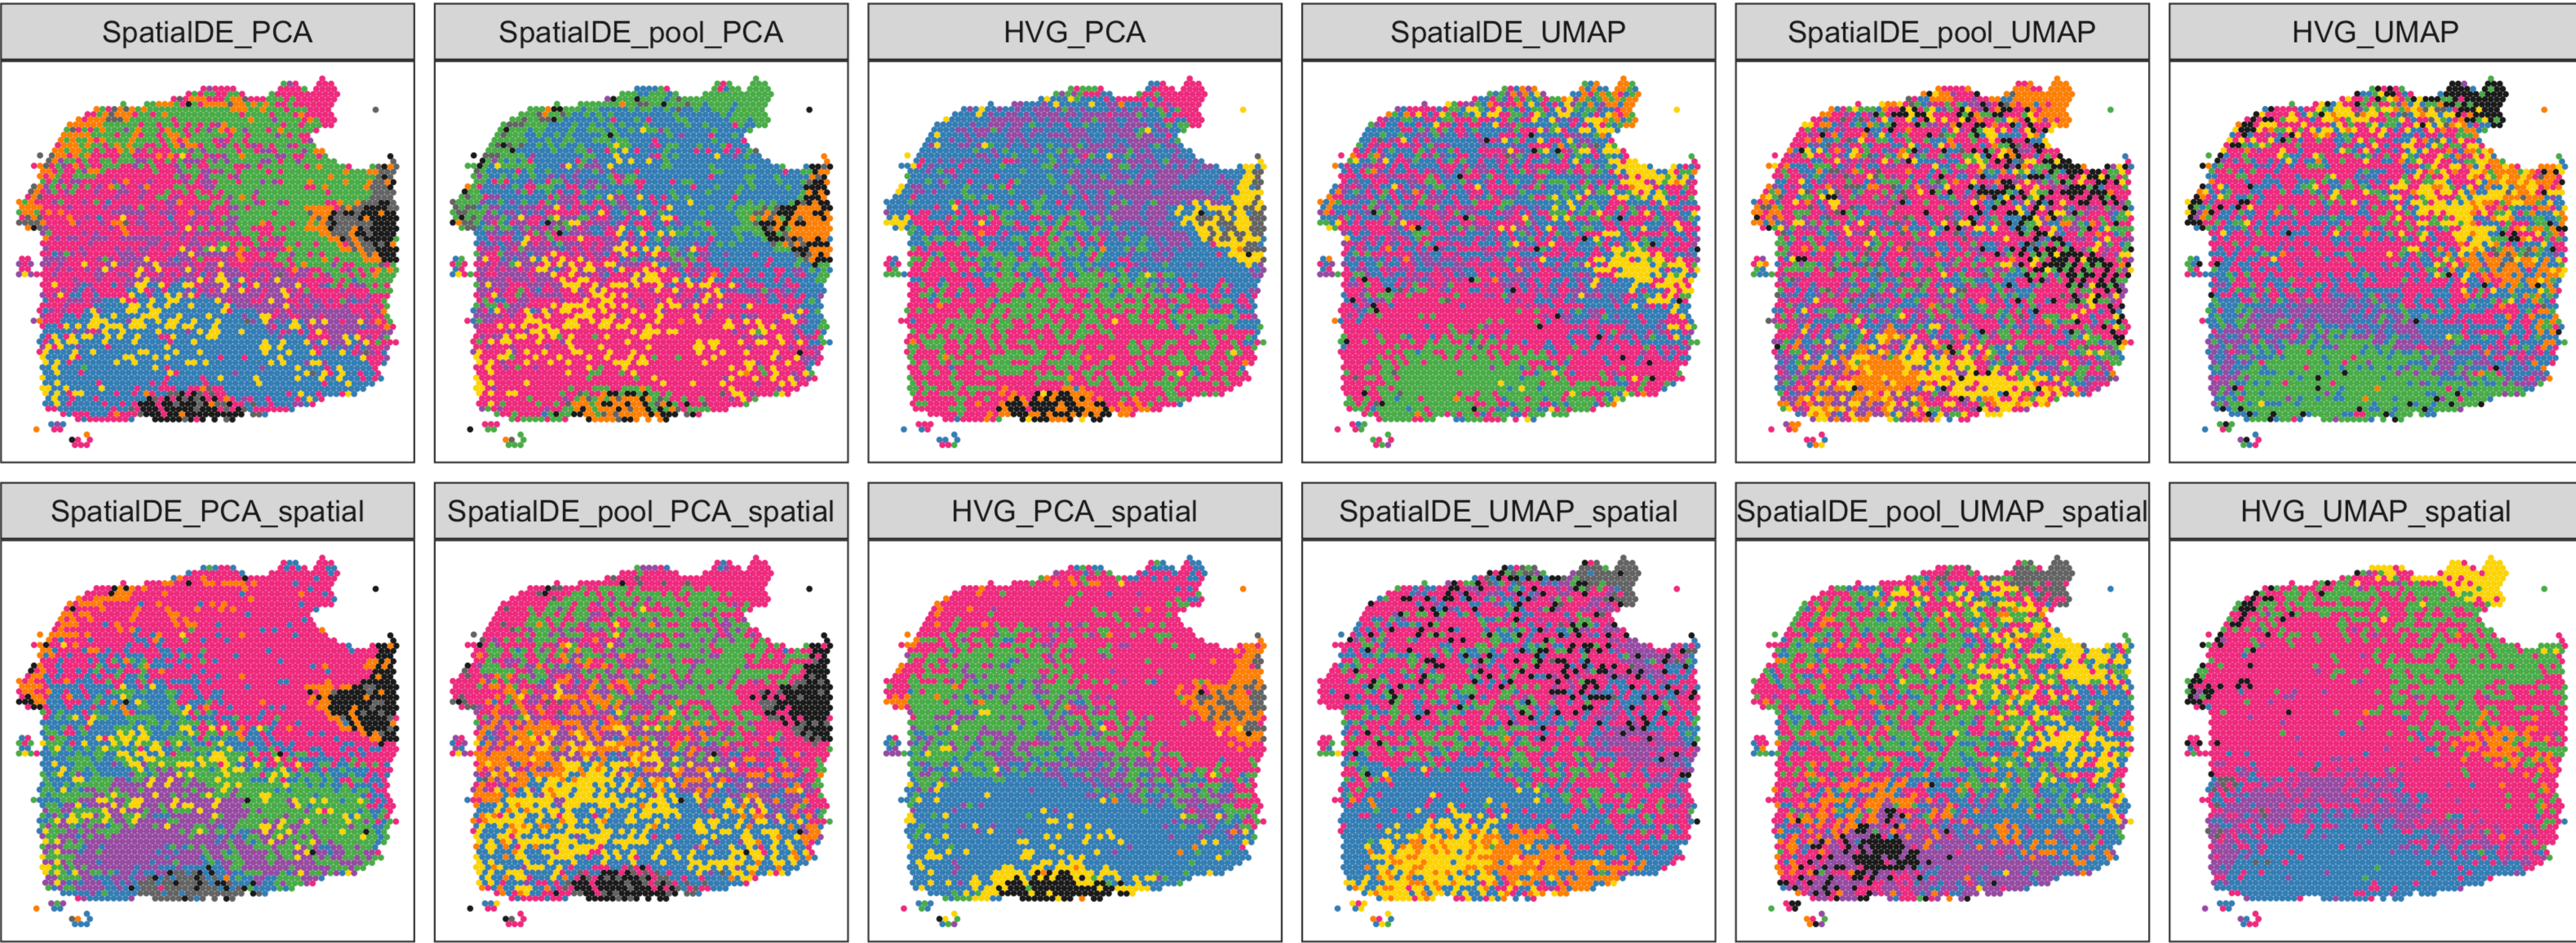



# Sample 151670: Clustering (semi-supervised and markers)

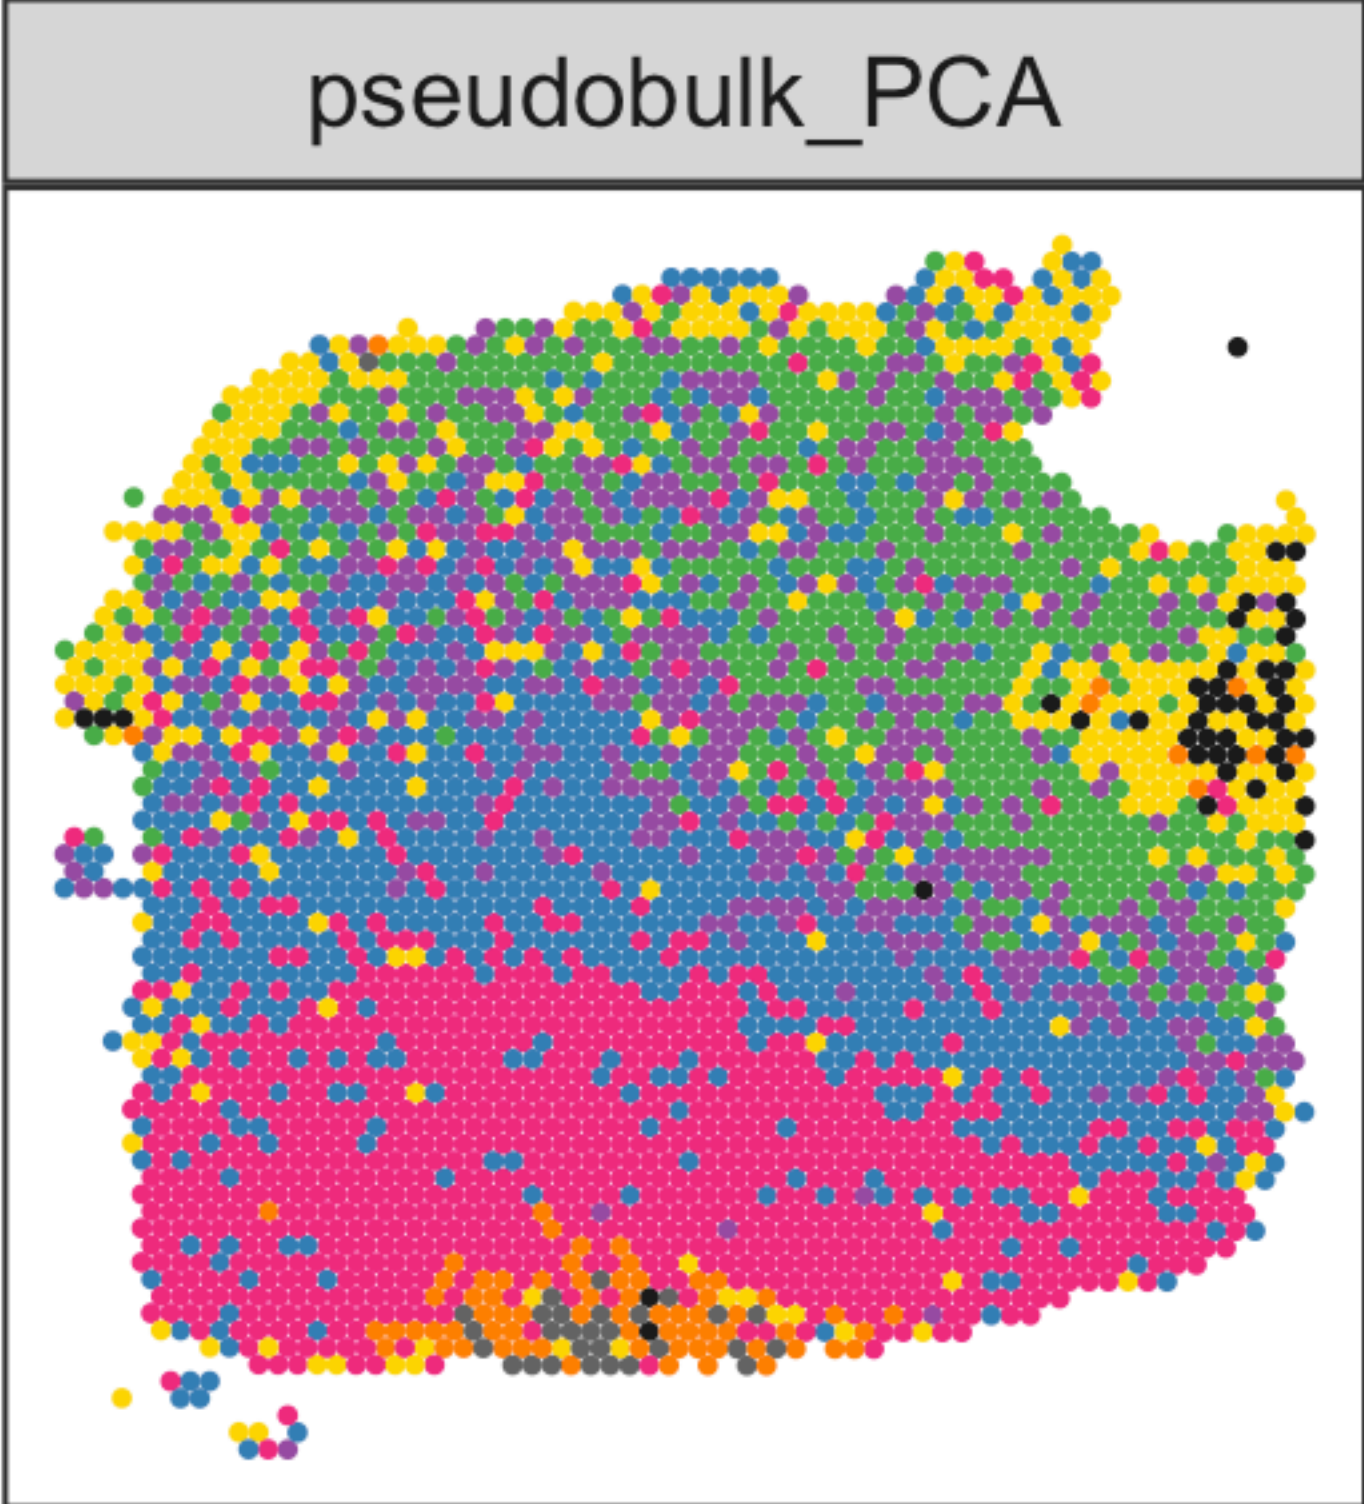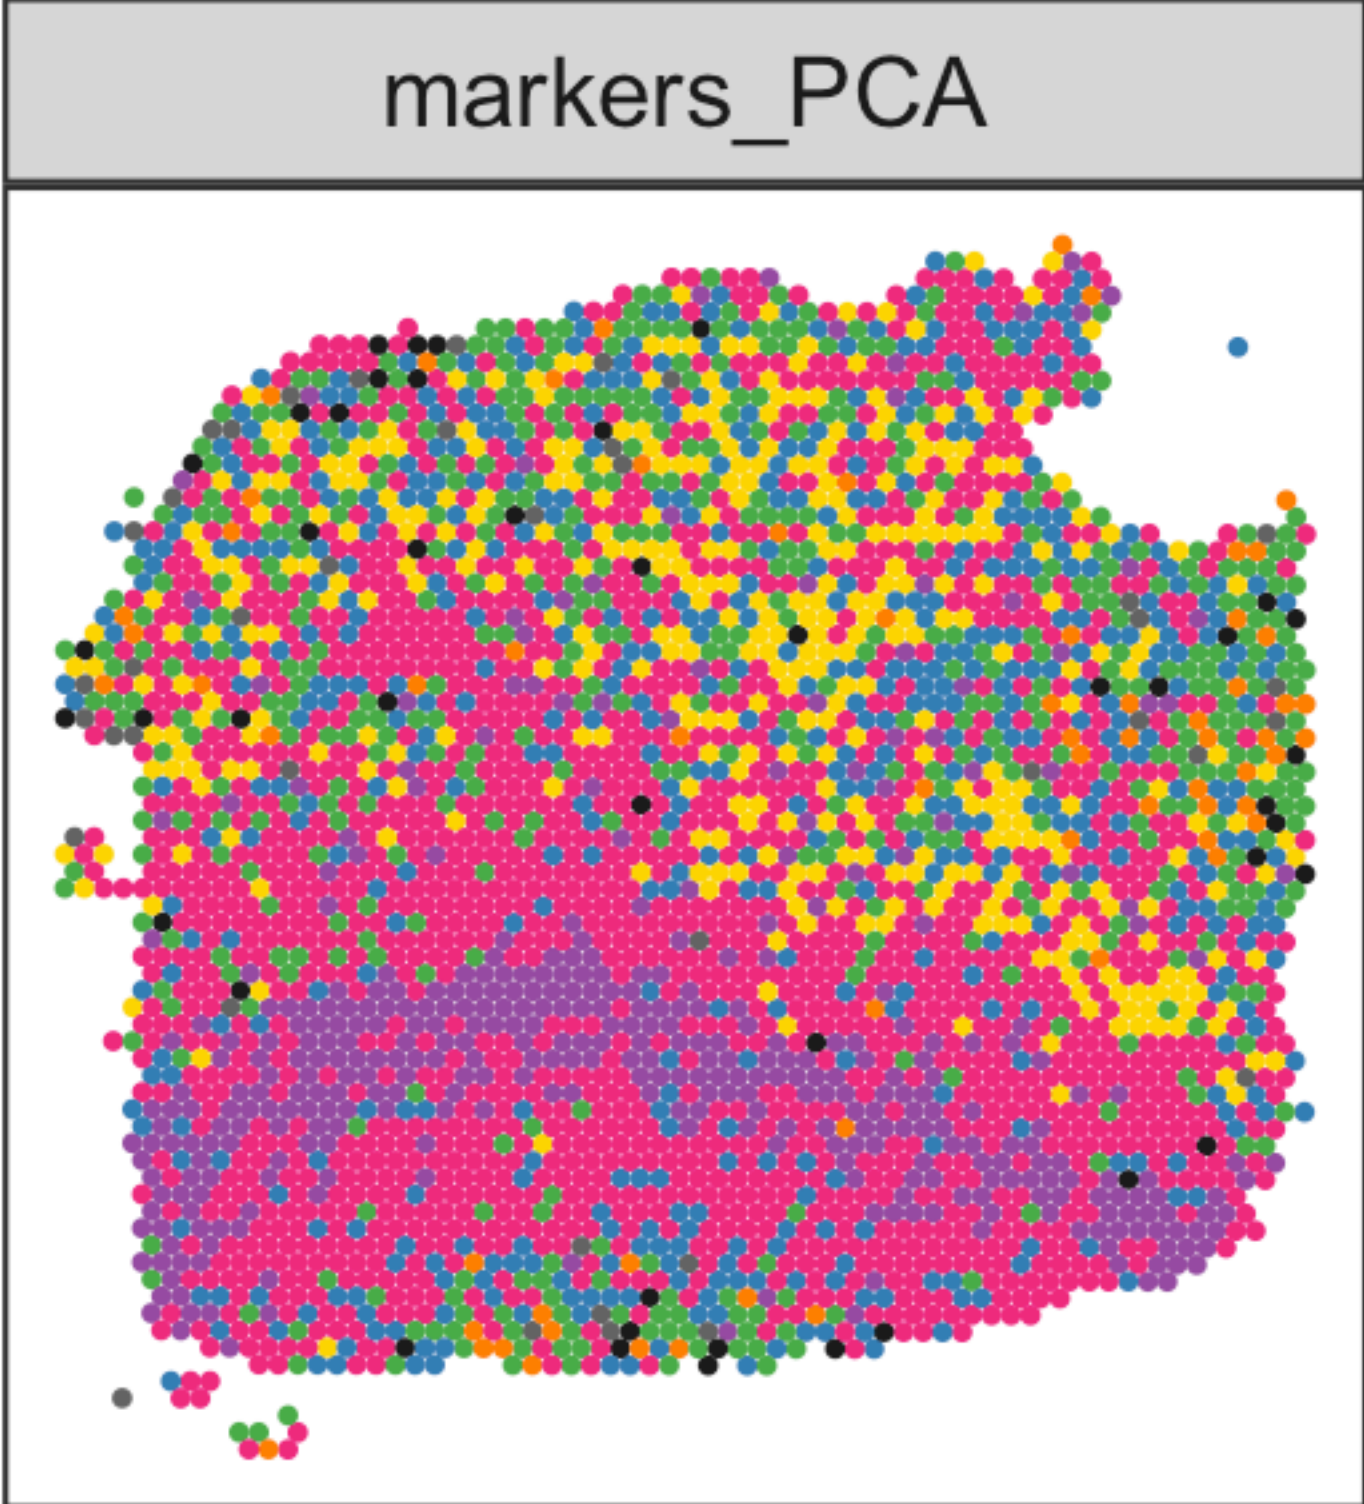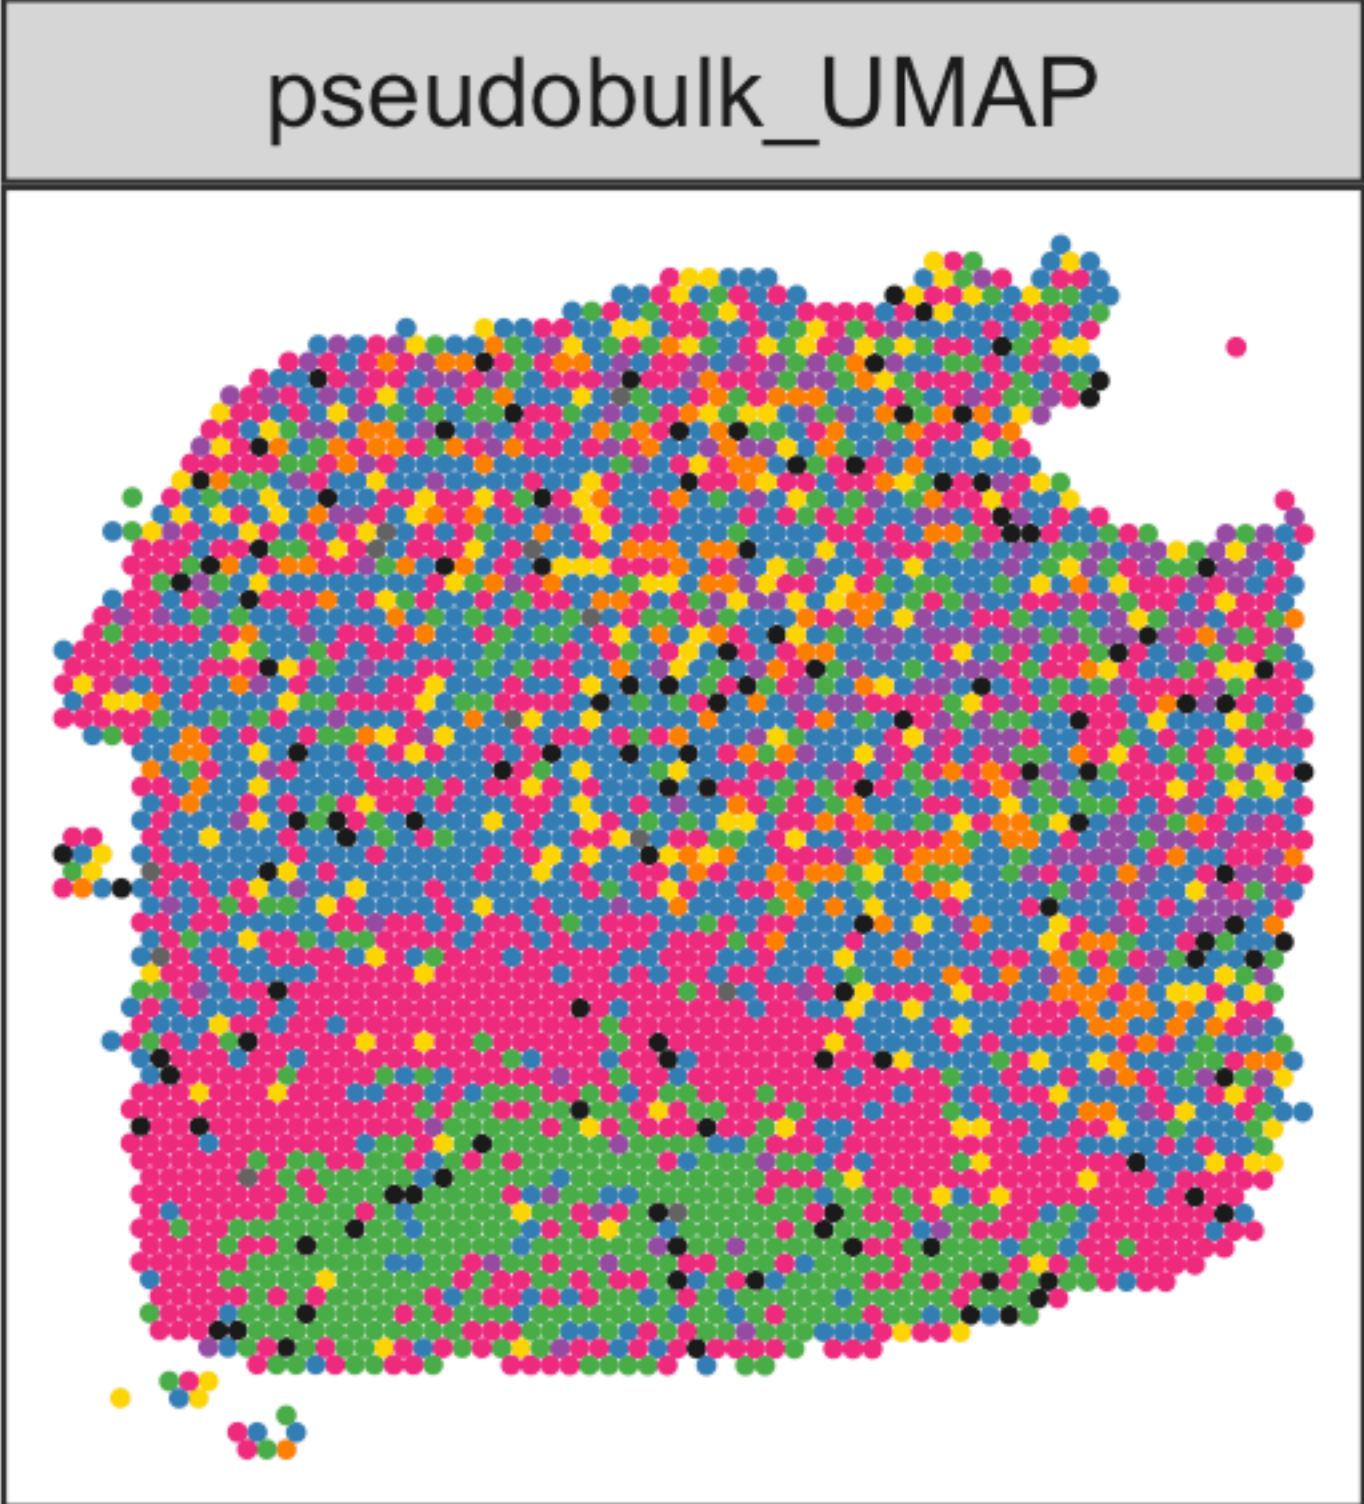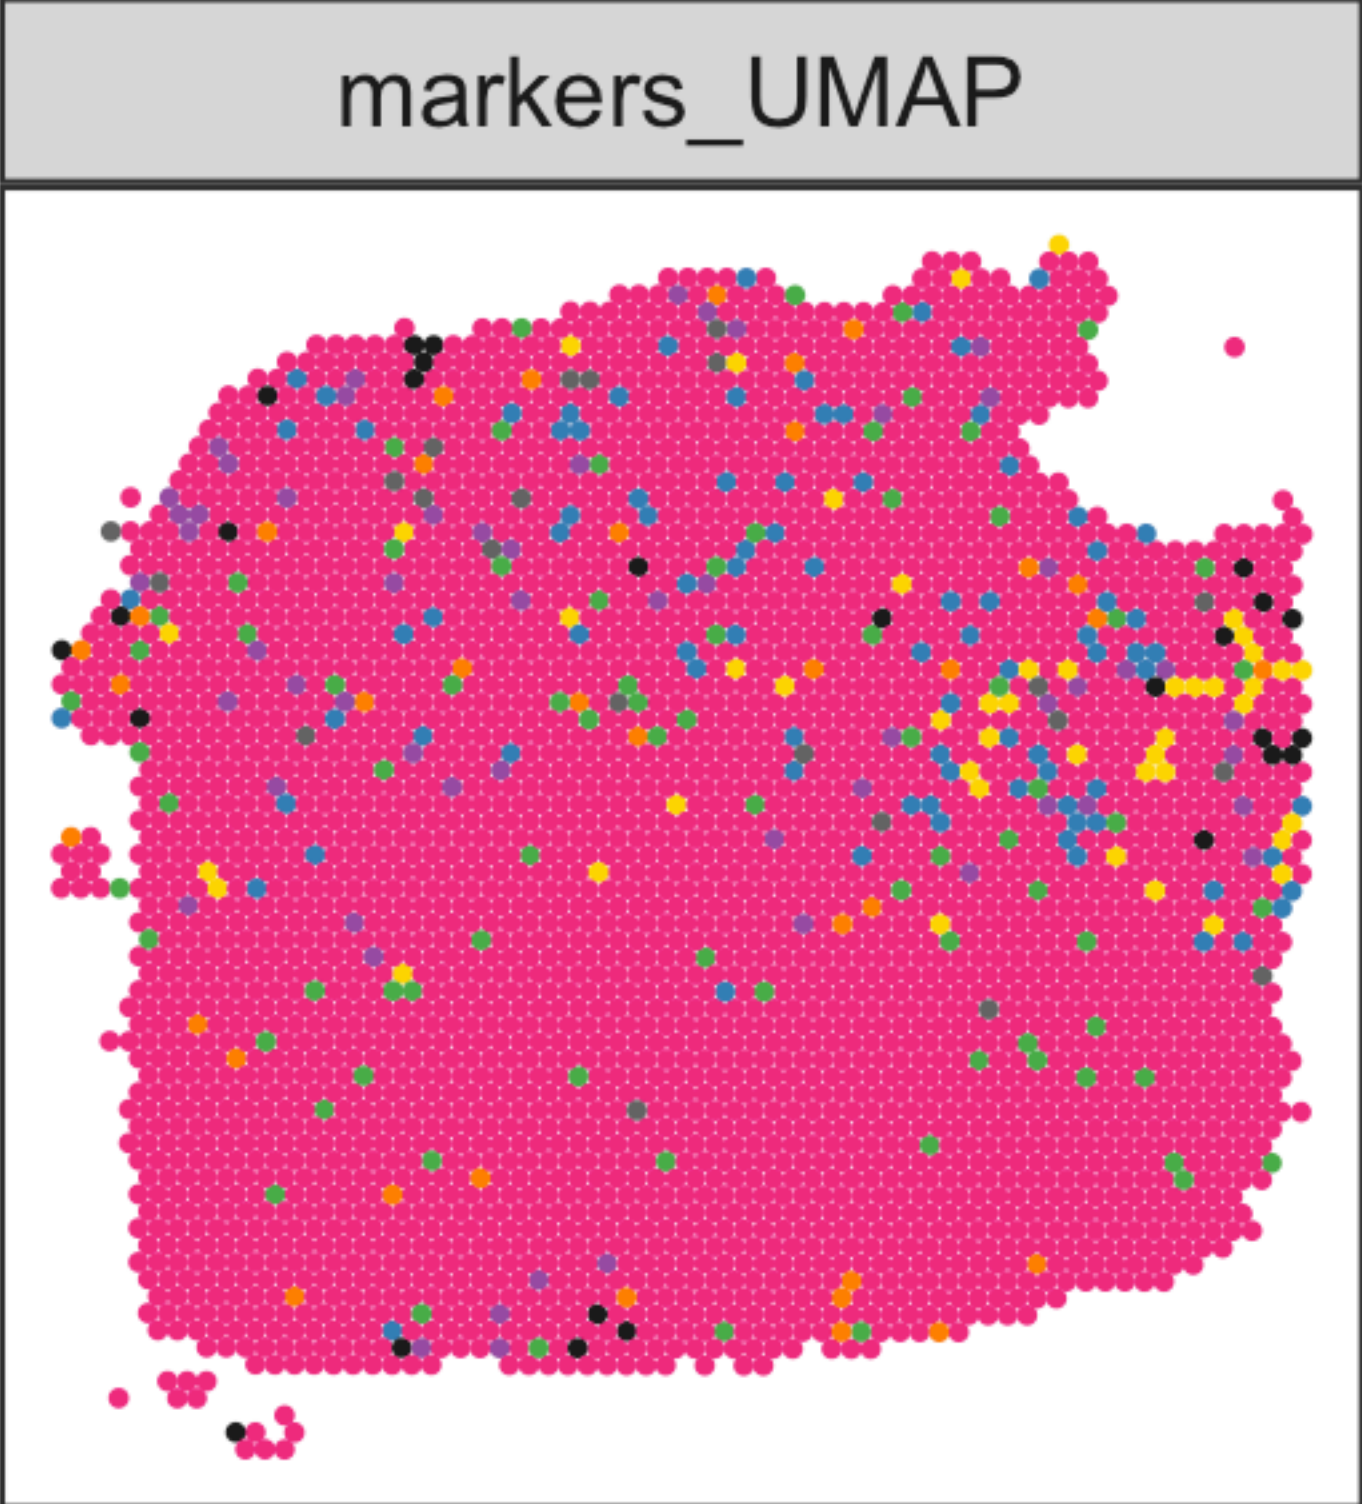

cluster

- 1
- 2
- 3
- 4
- 5
- 6
- 7
- 8

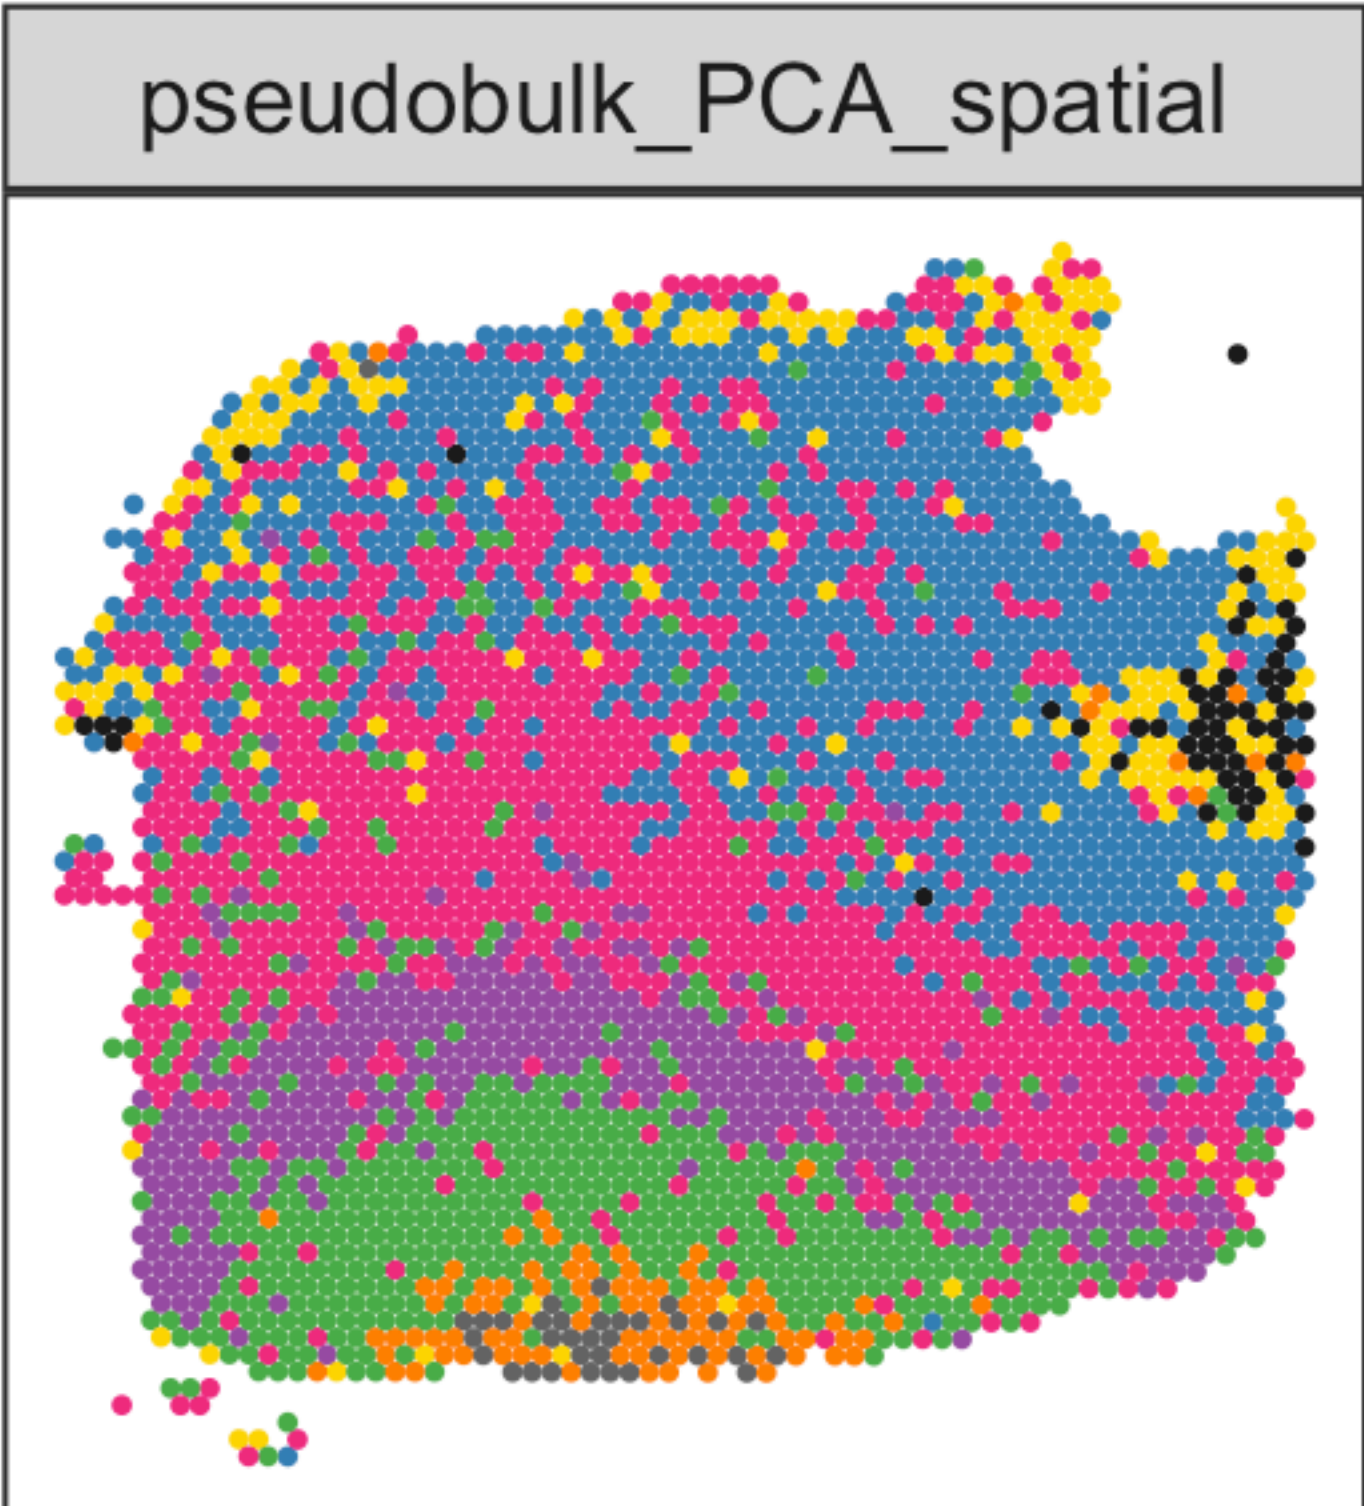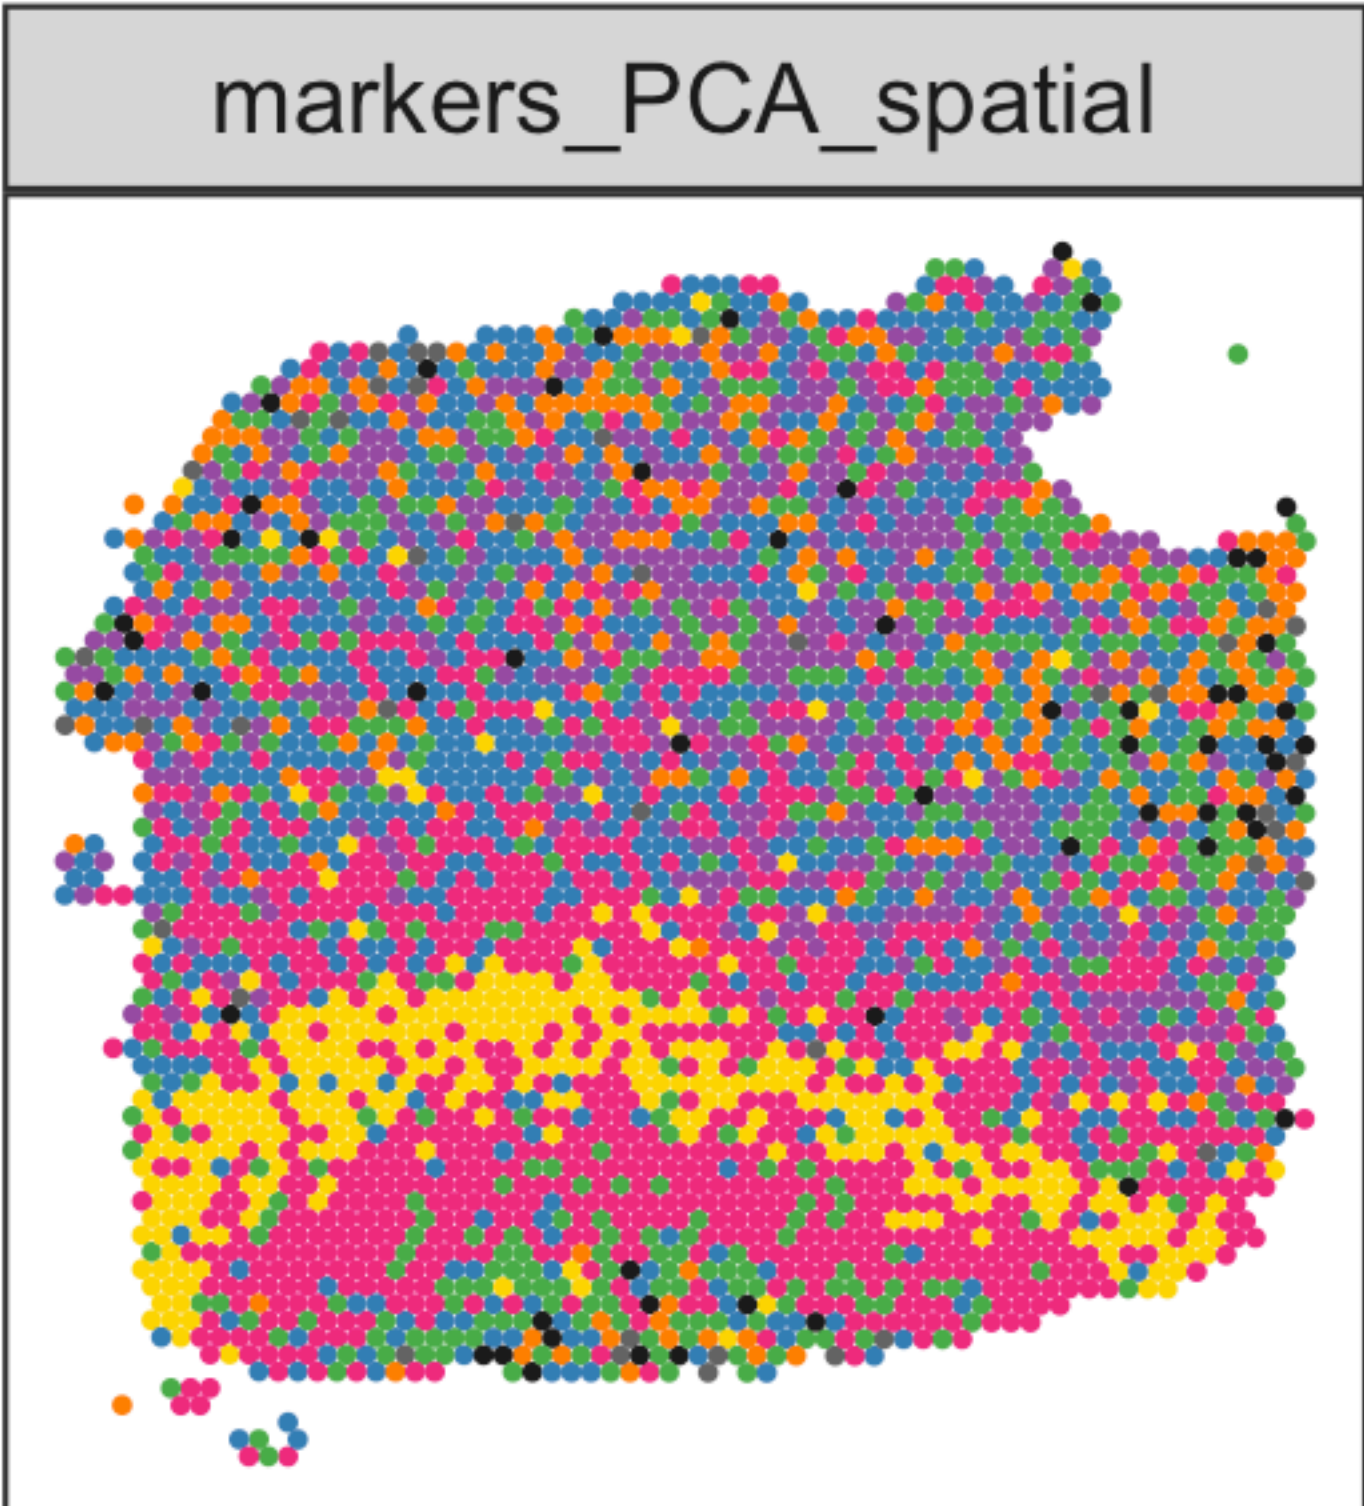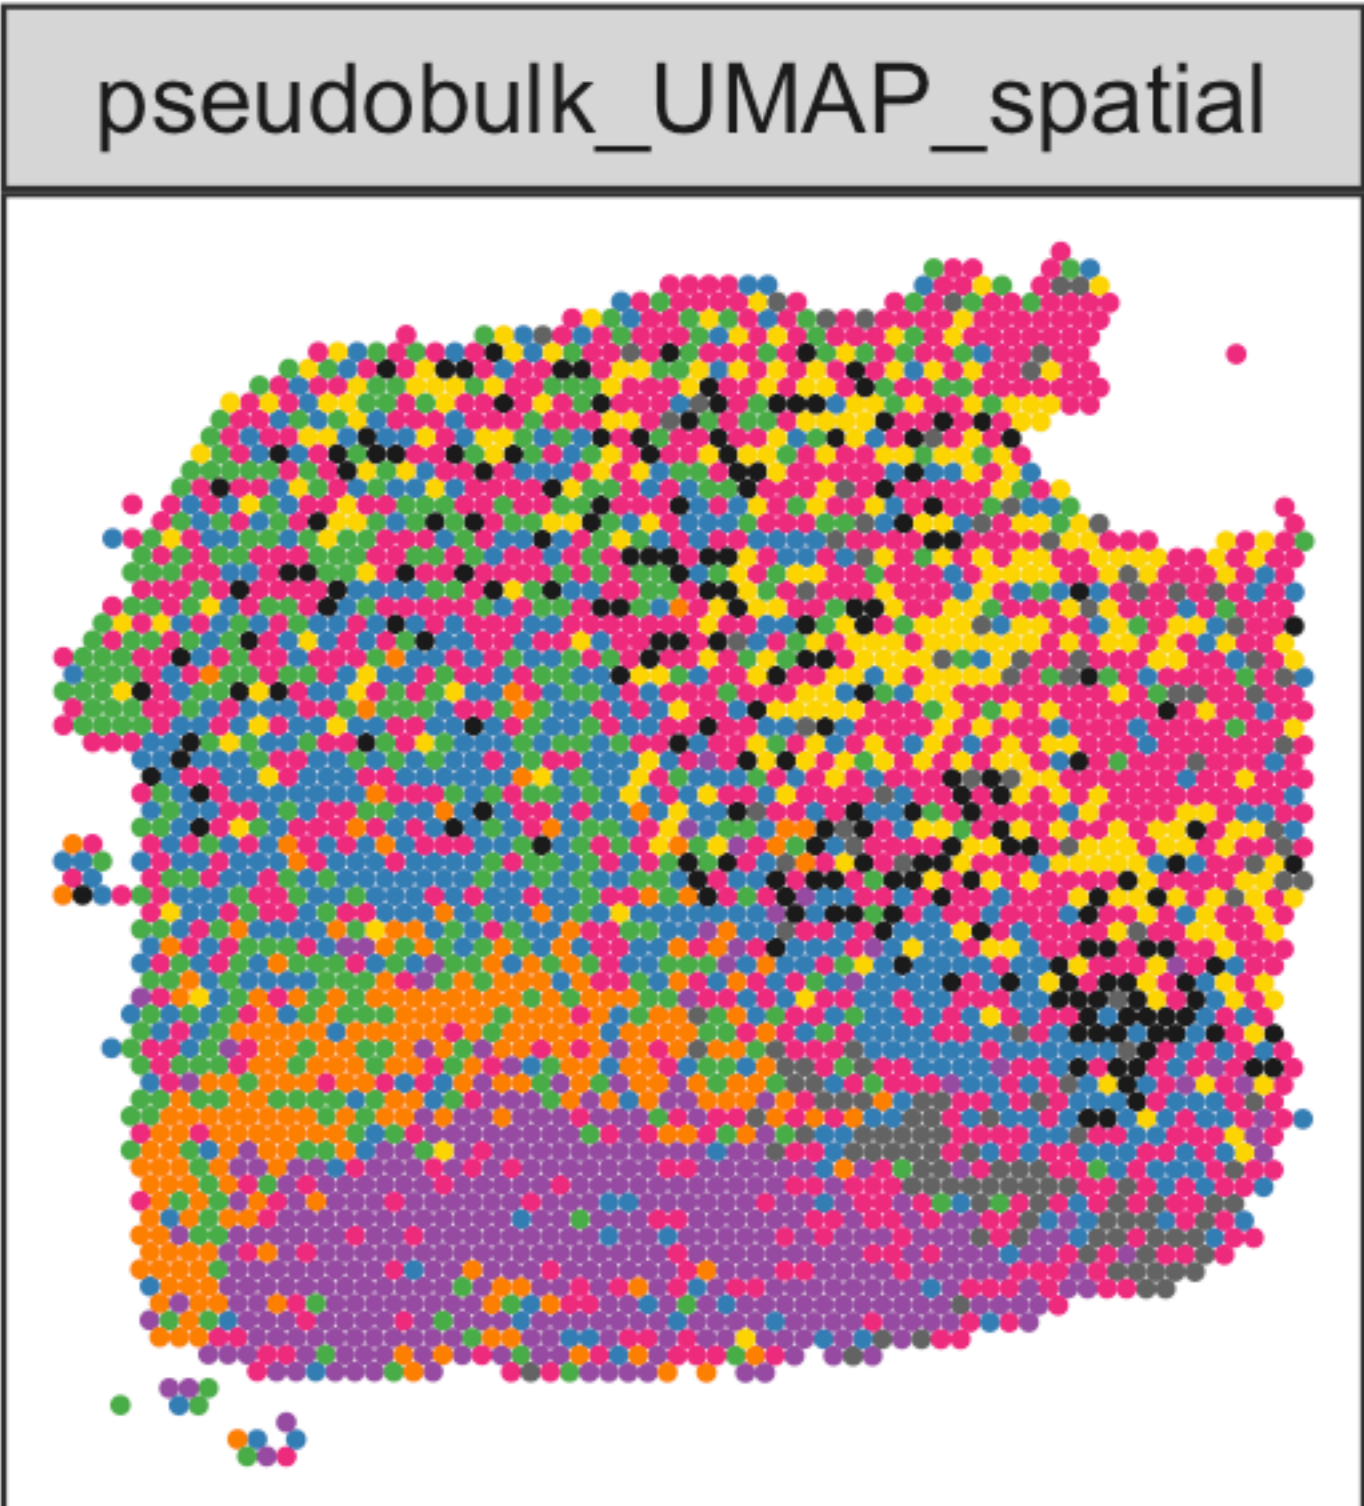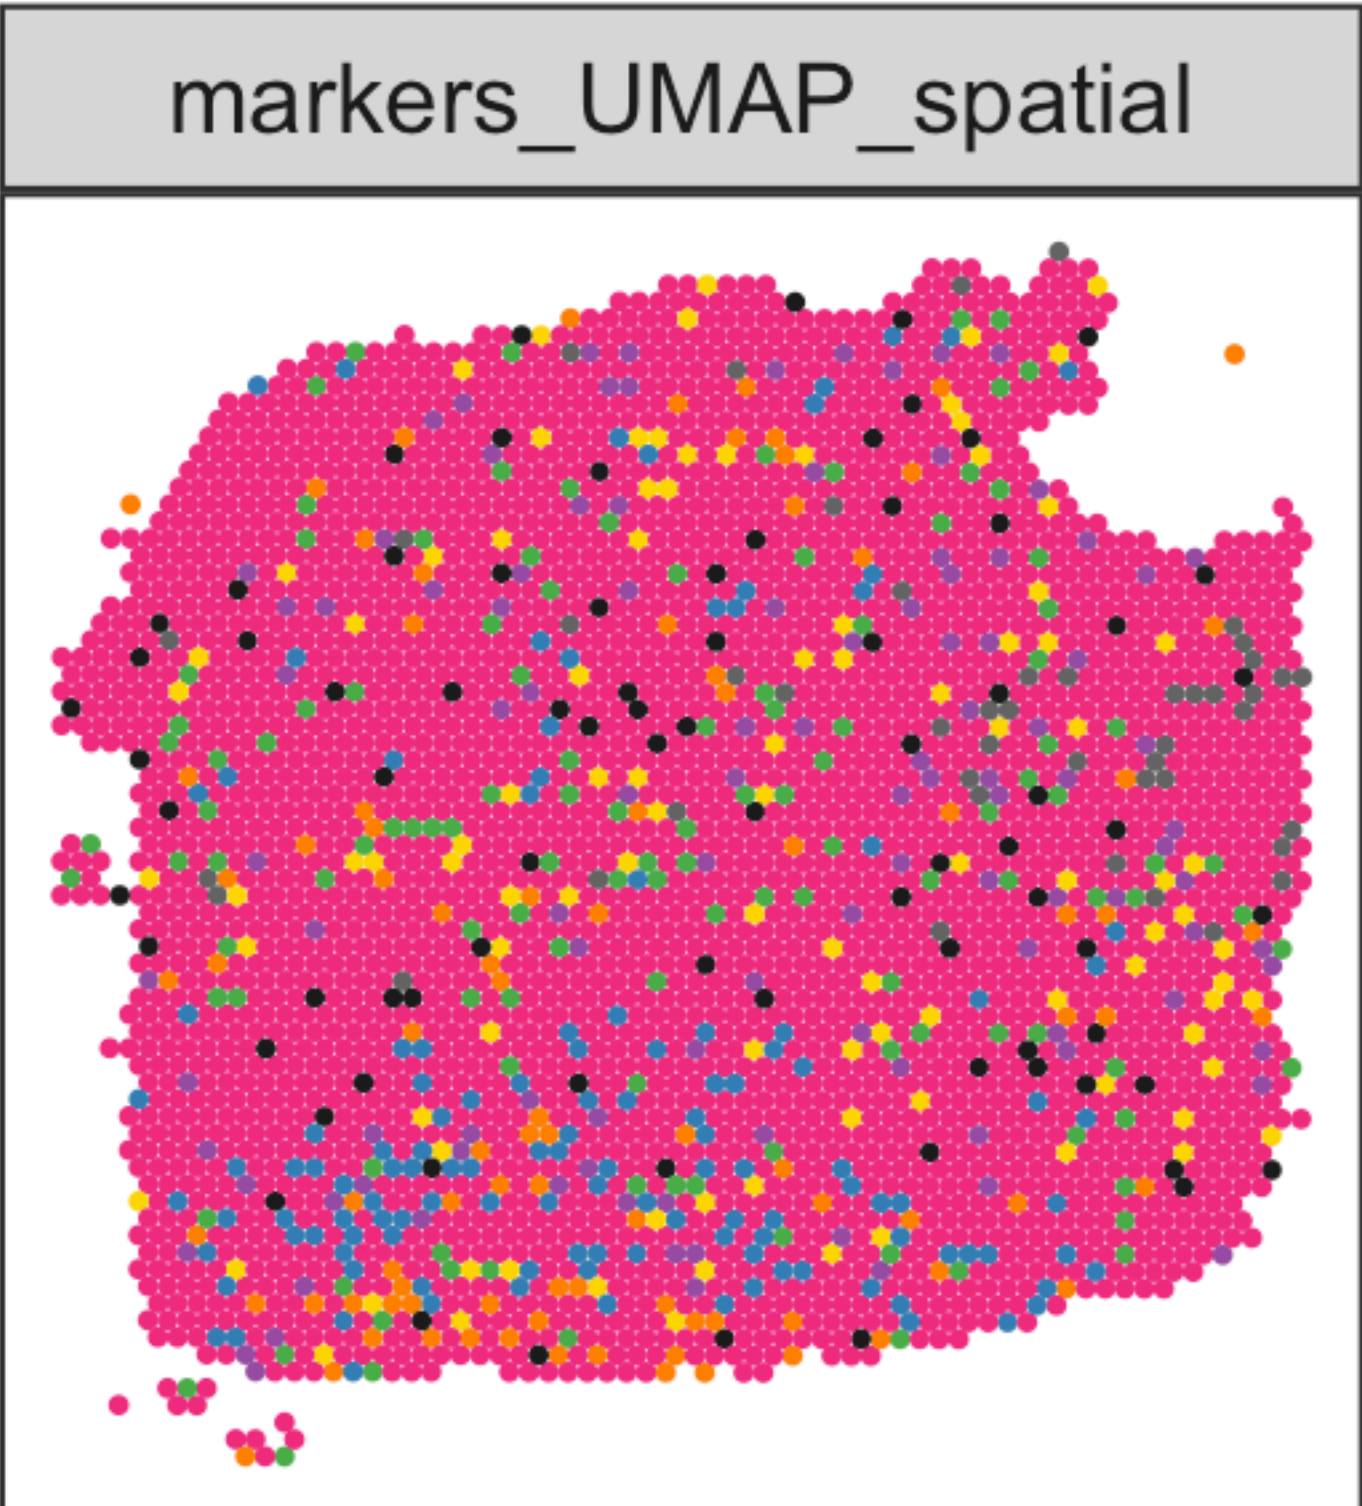



# Sample 151671: Clustering (unsupervised)

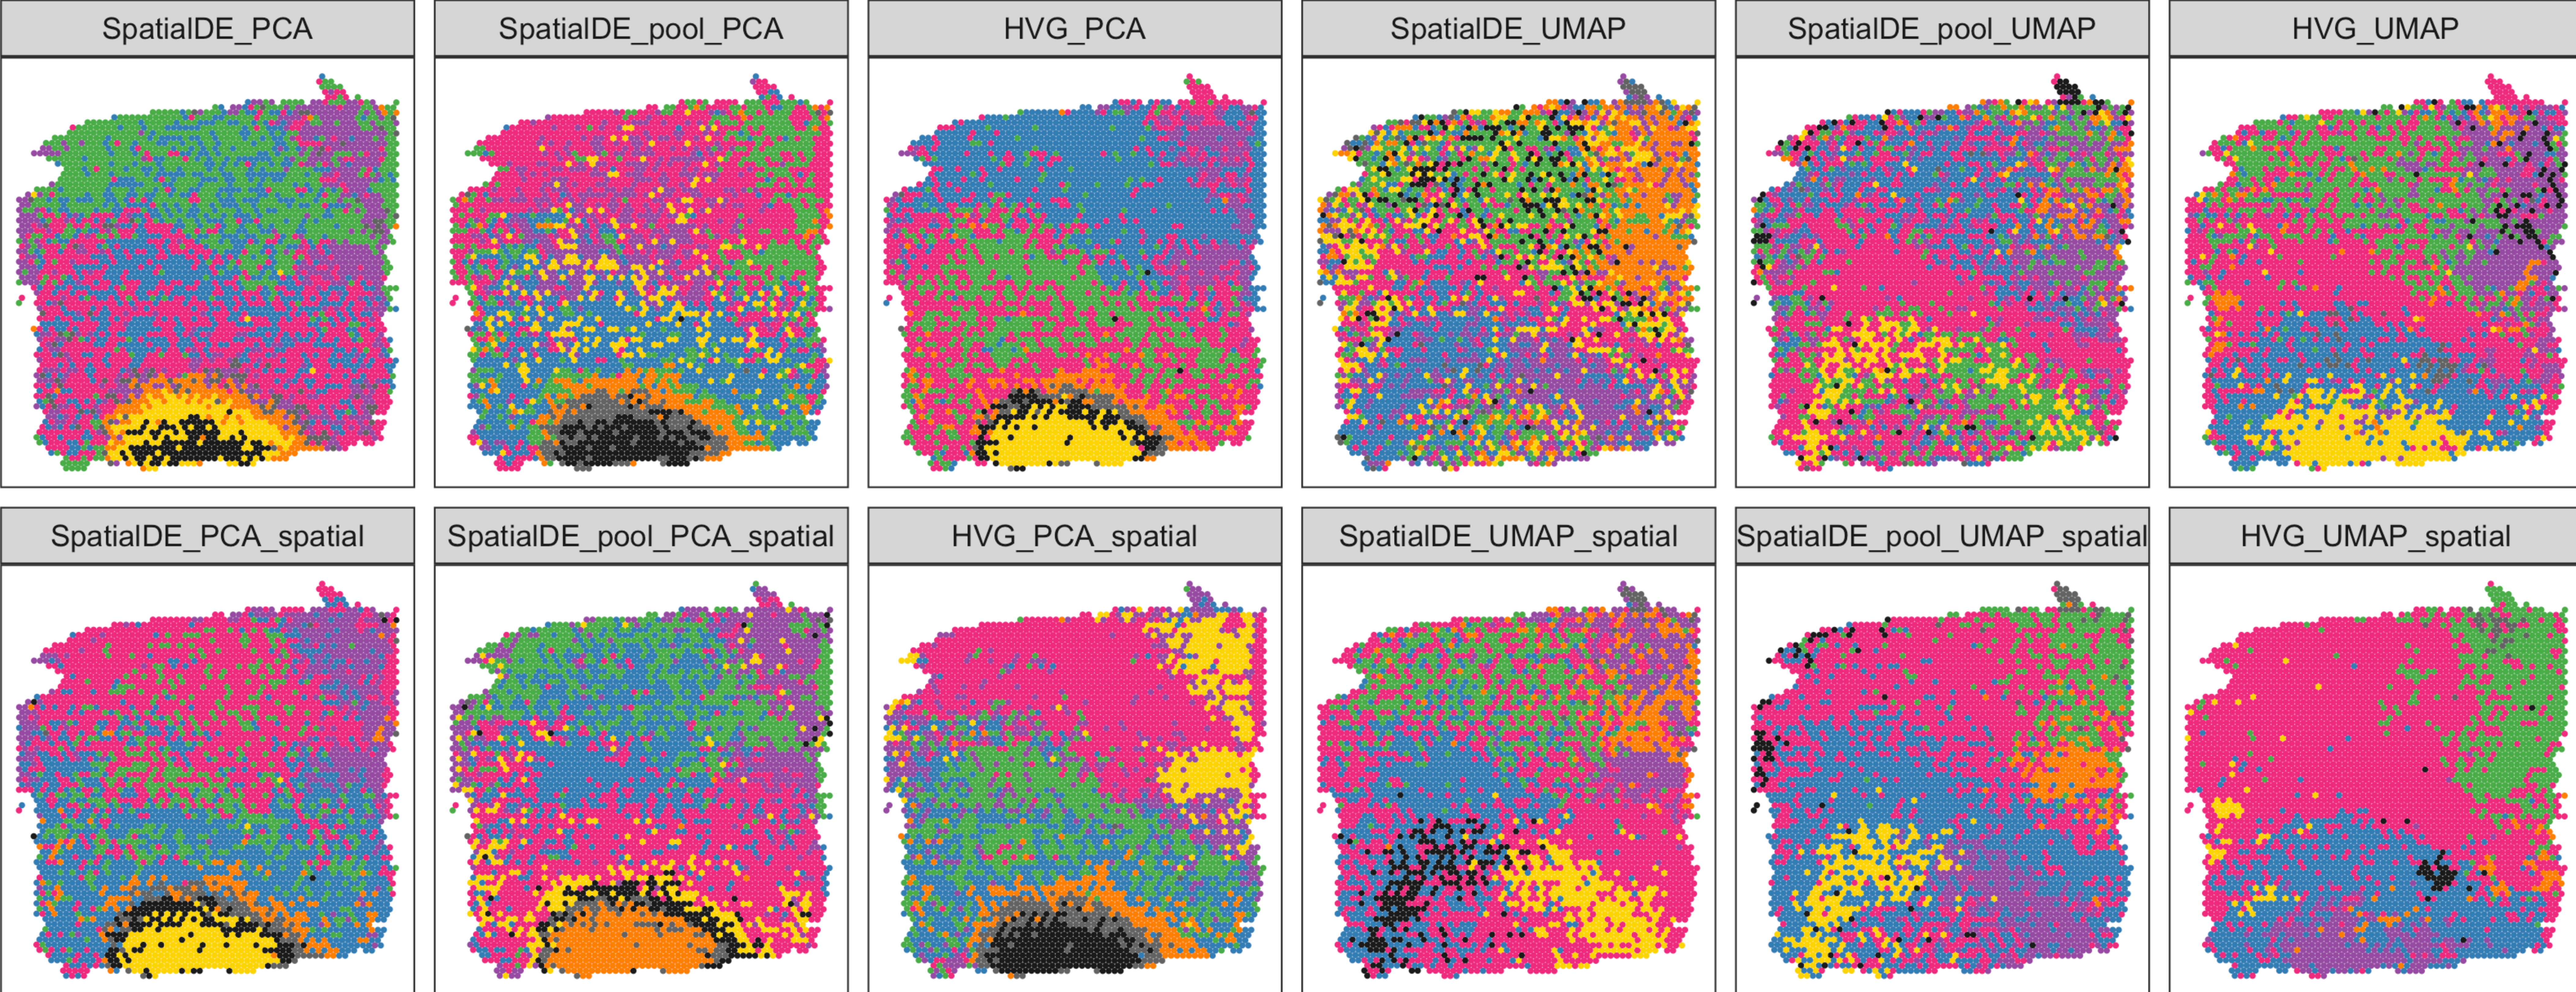



# Sample 151671: Clustering (semi-supervised and markers)

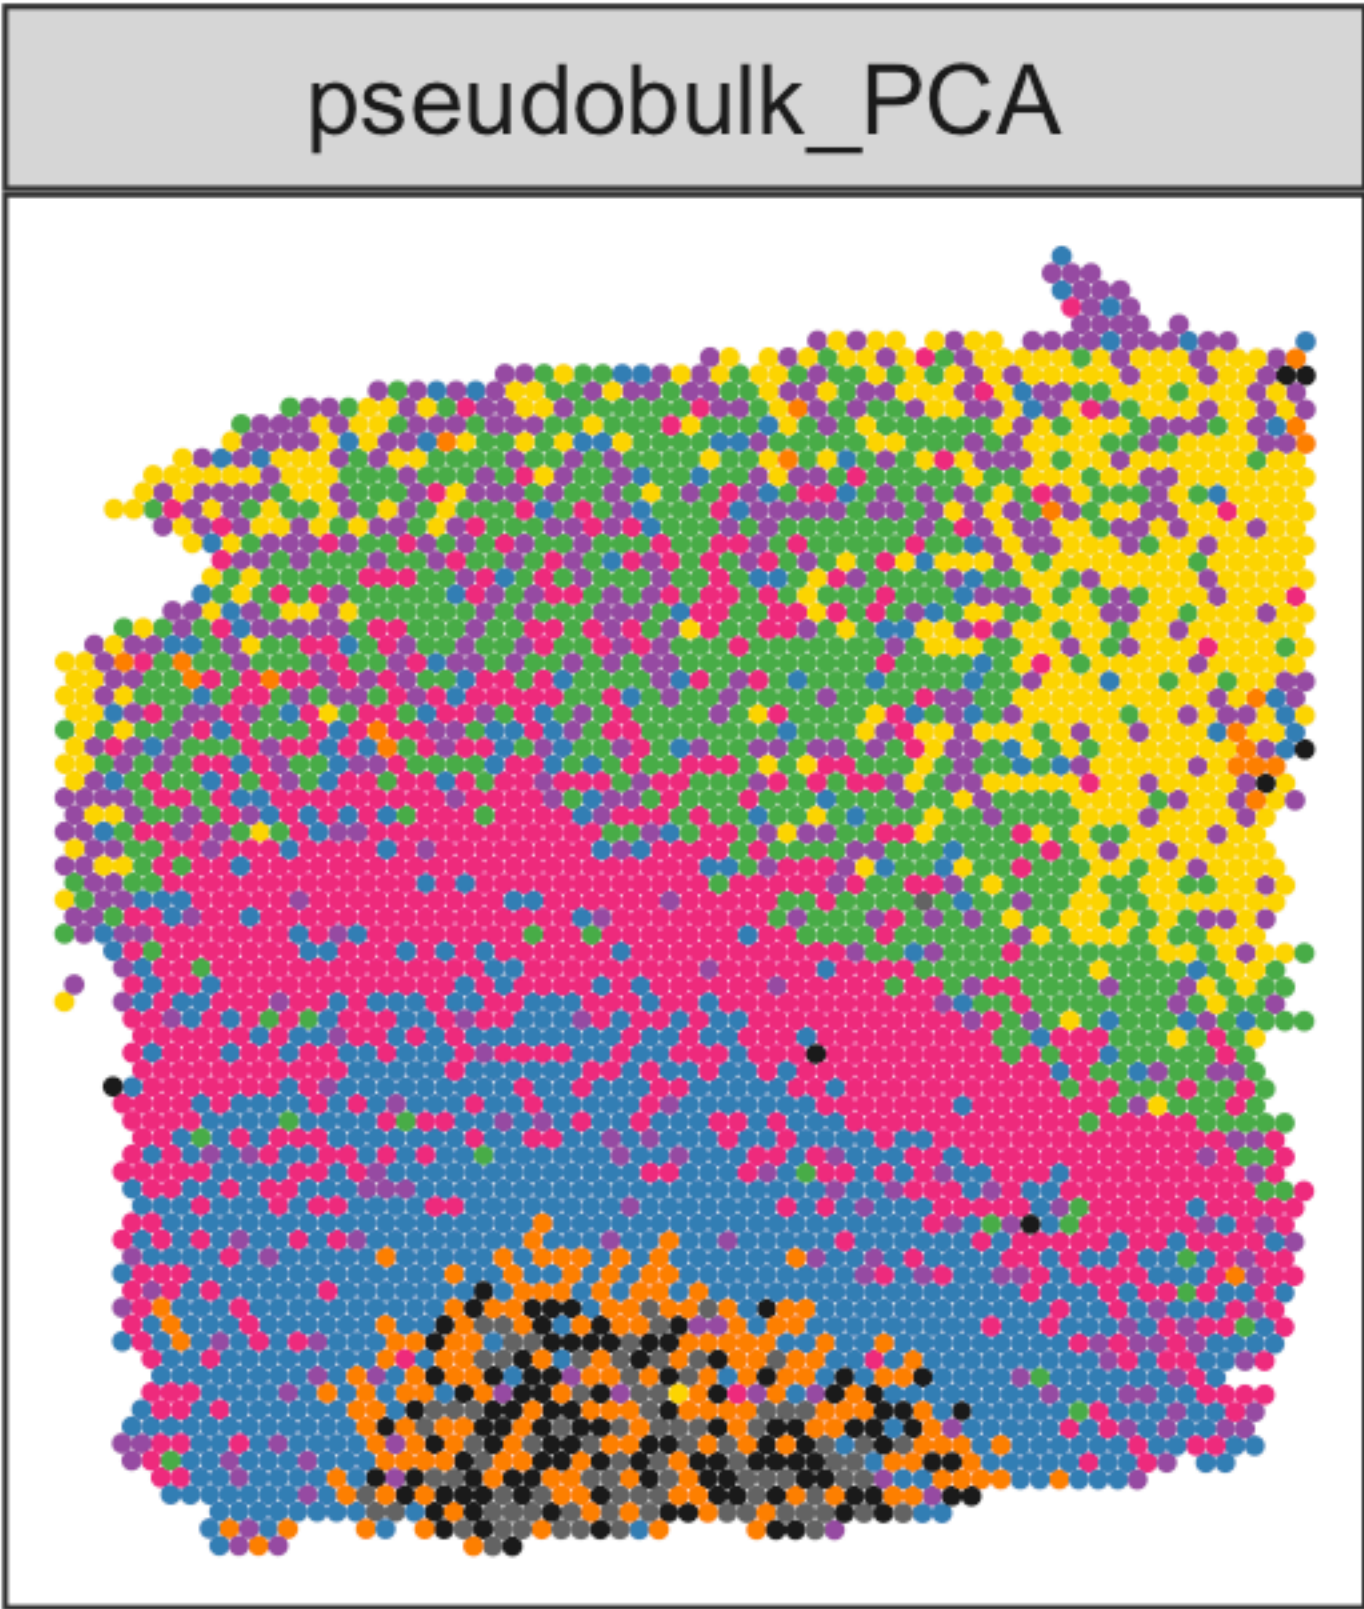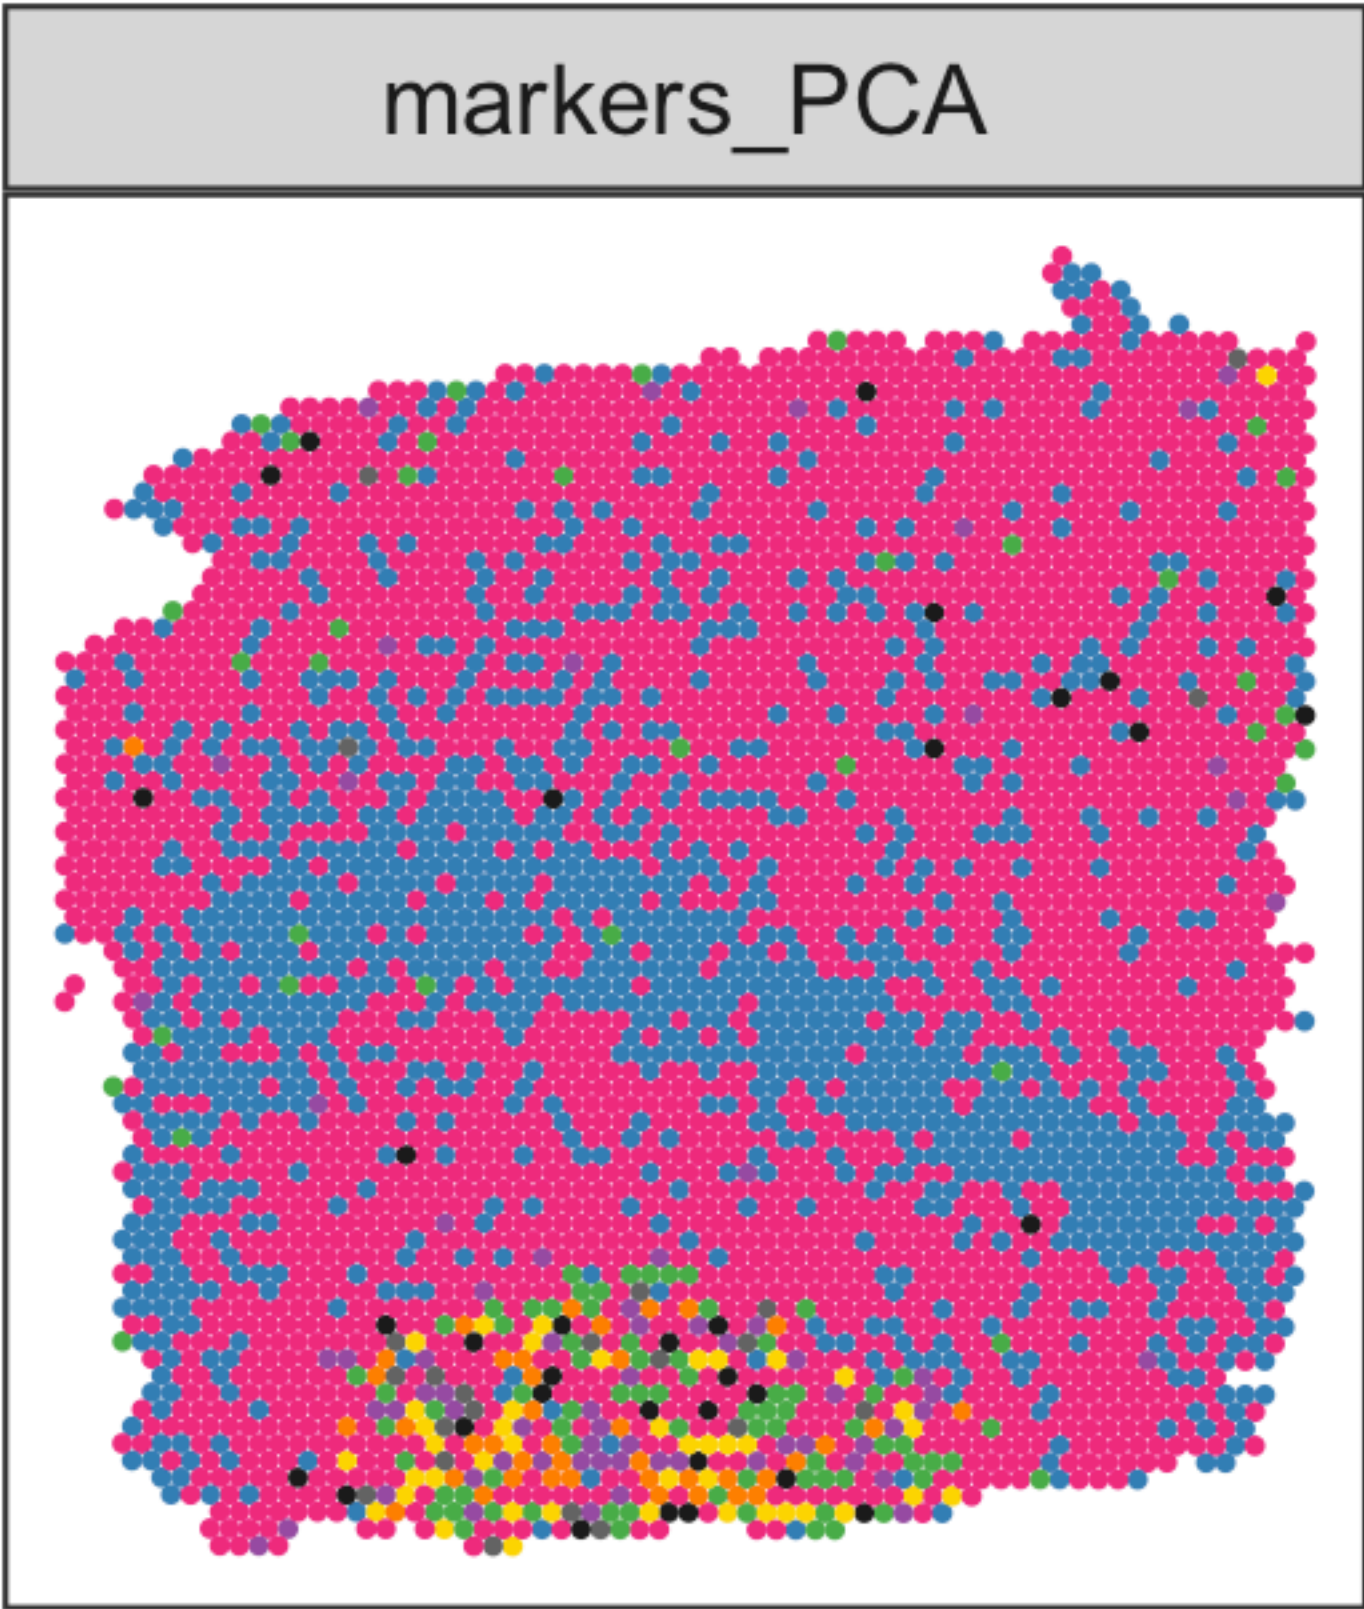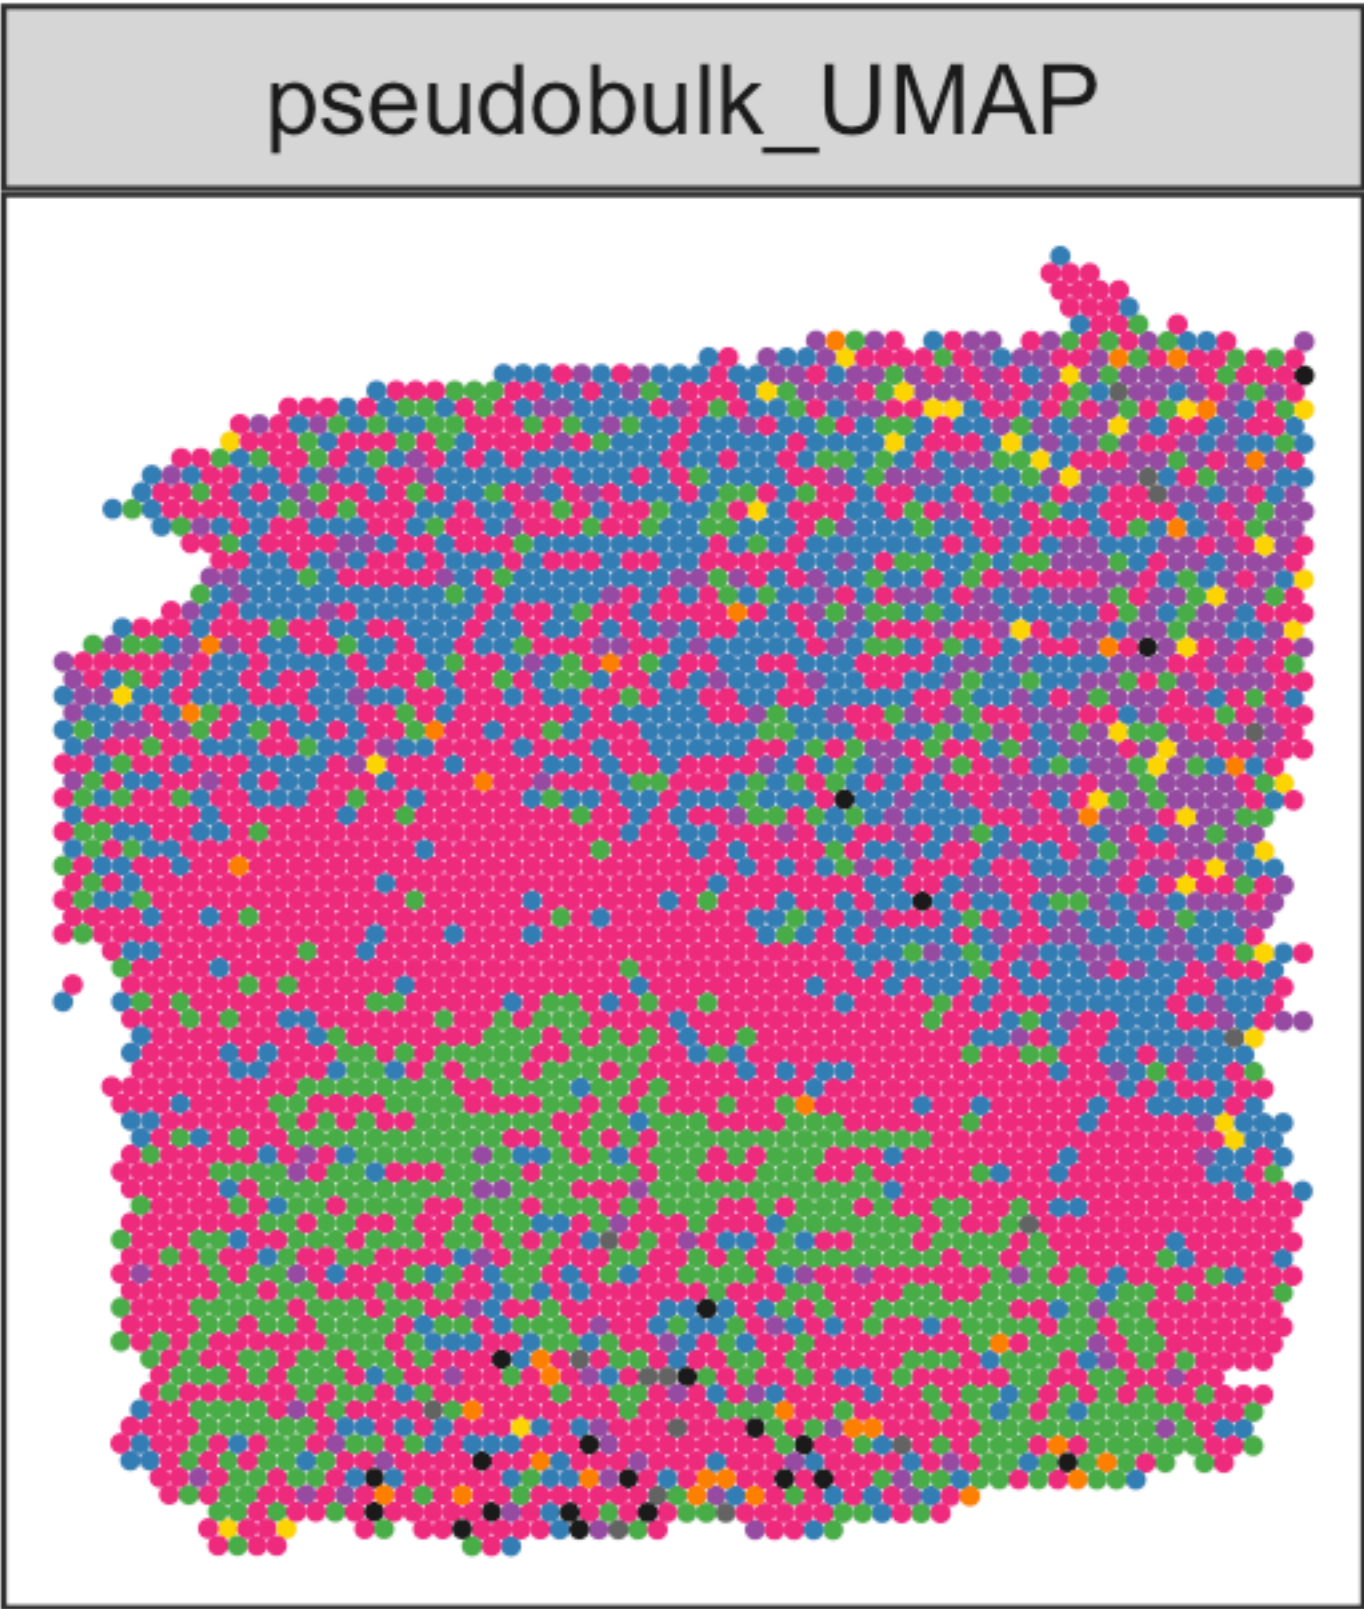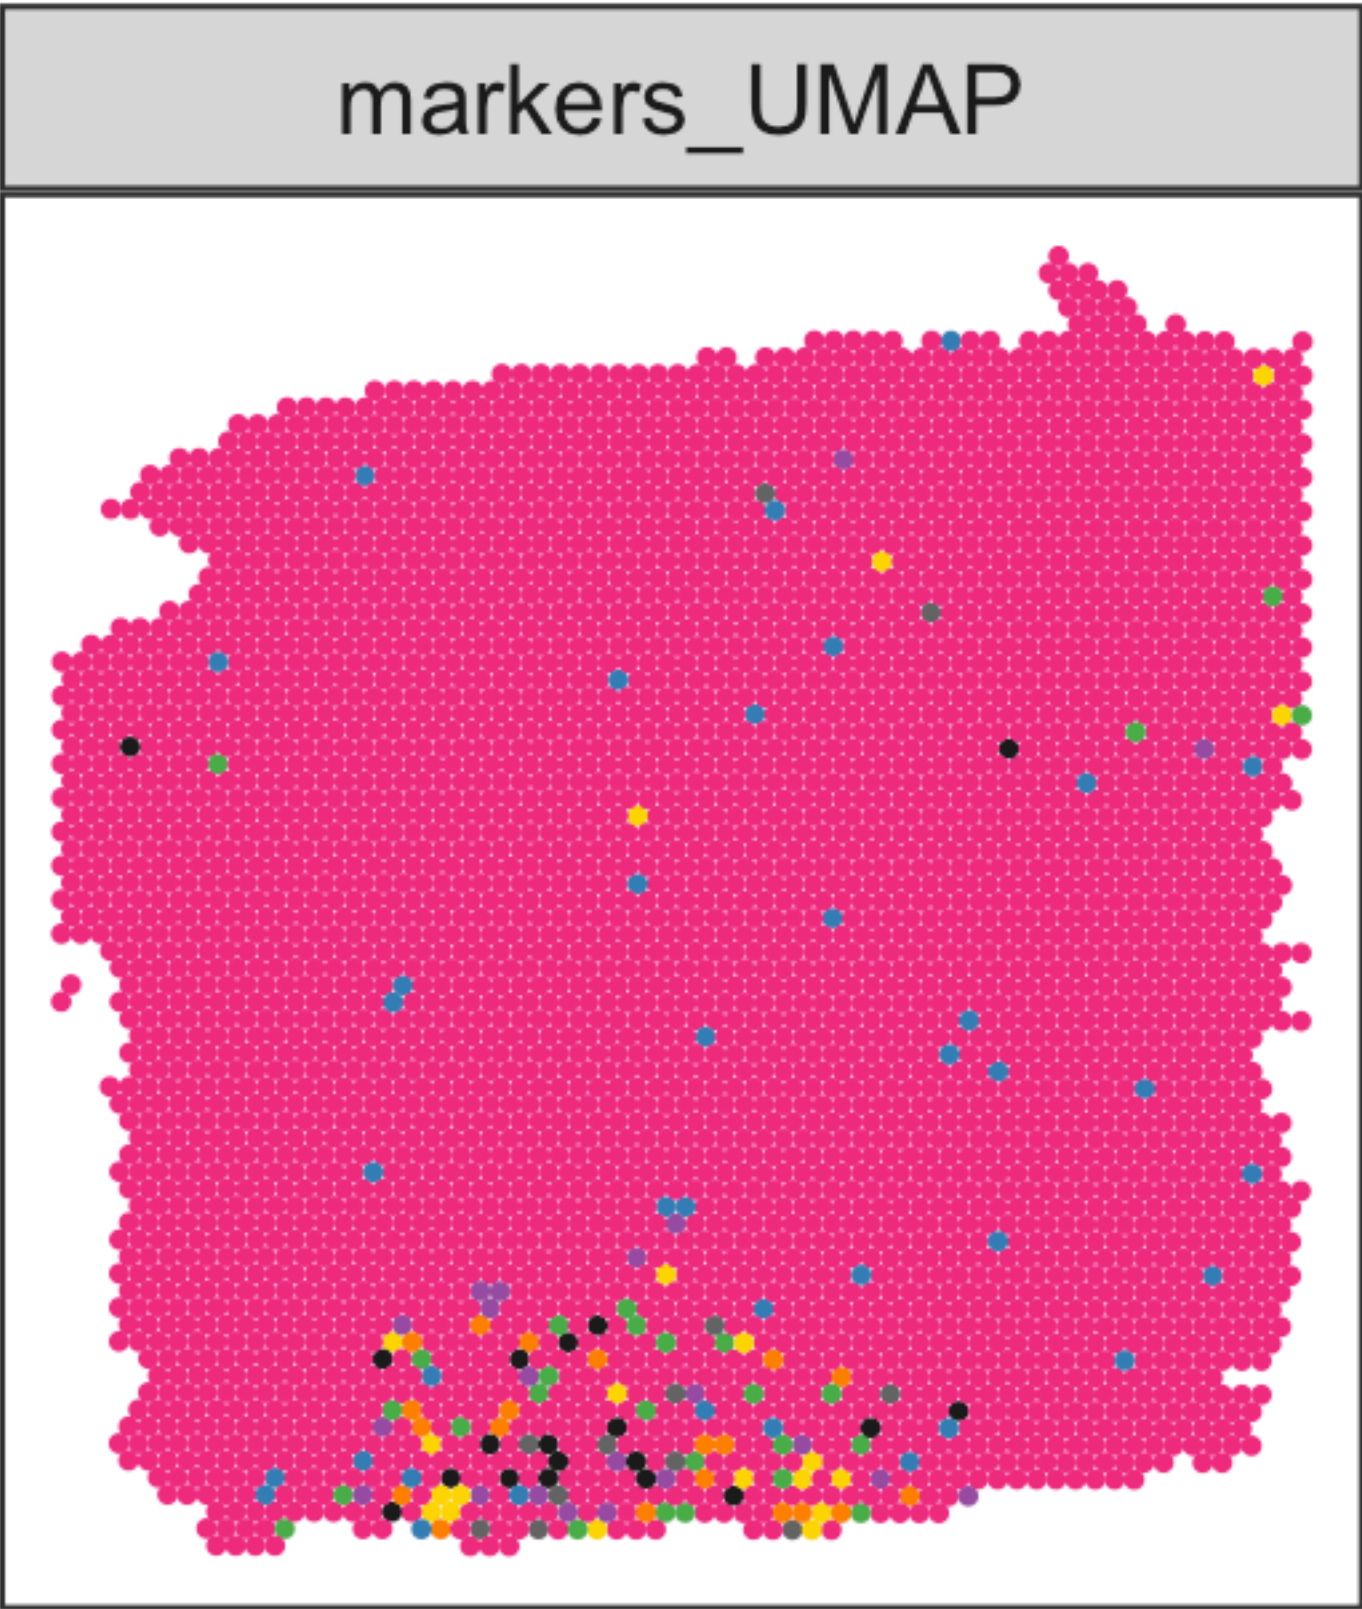

cluster

- 1
- 2
- 3
- 4
- 5
- 6
- 7
- 8

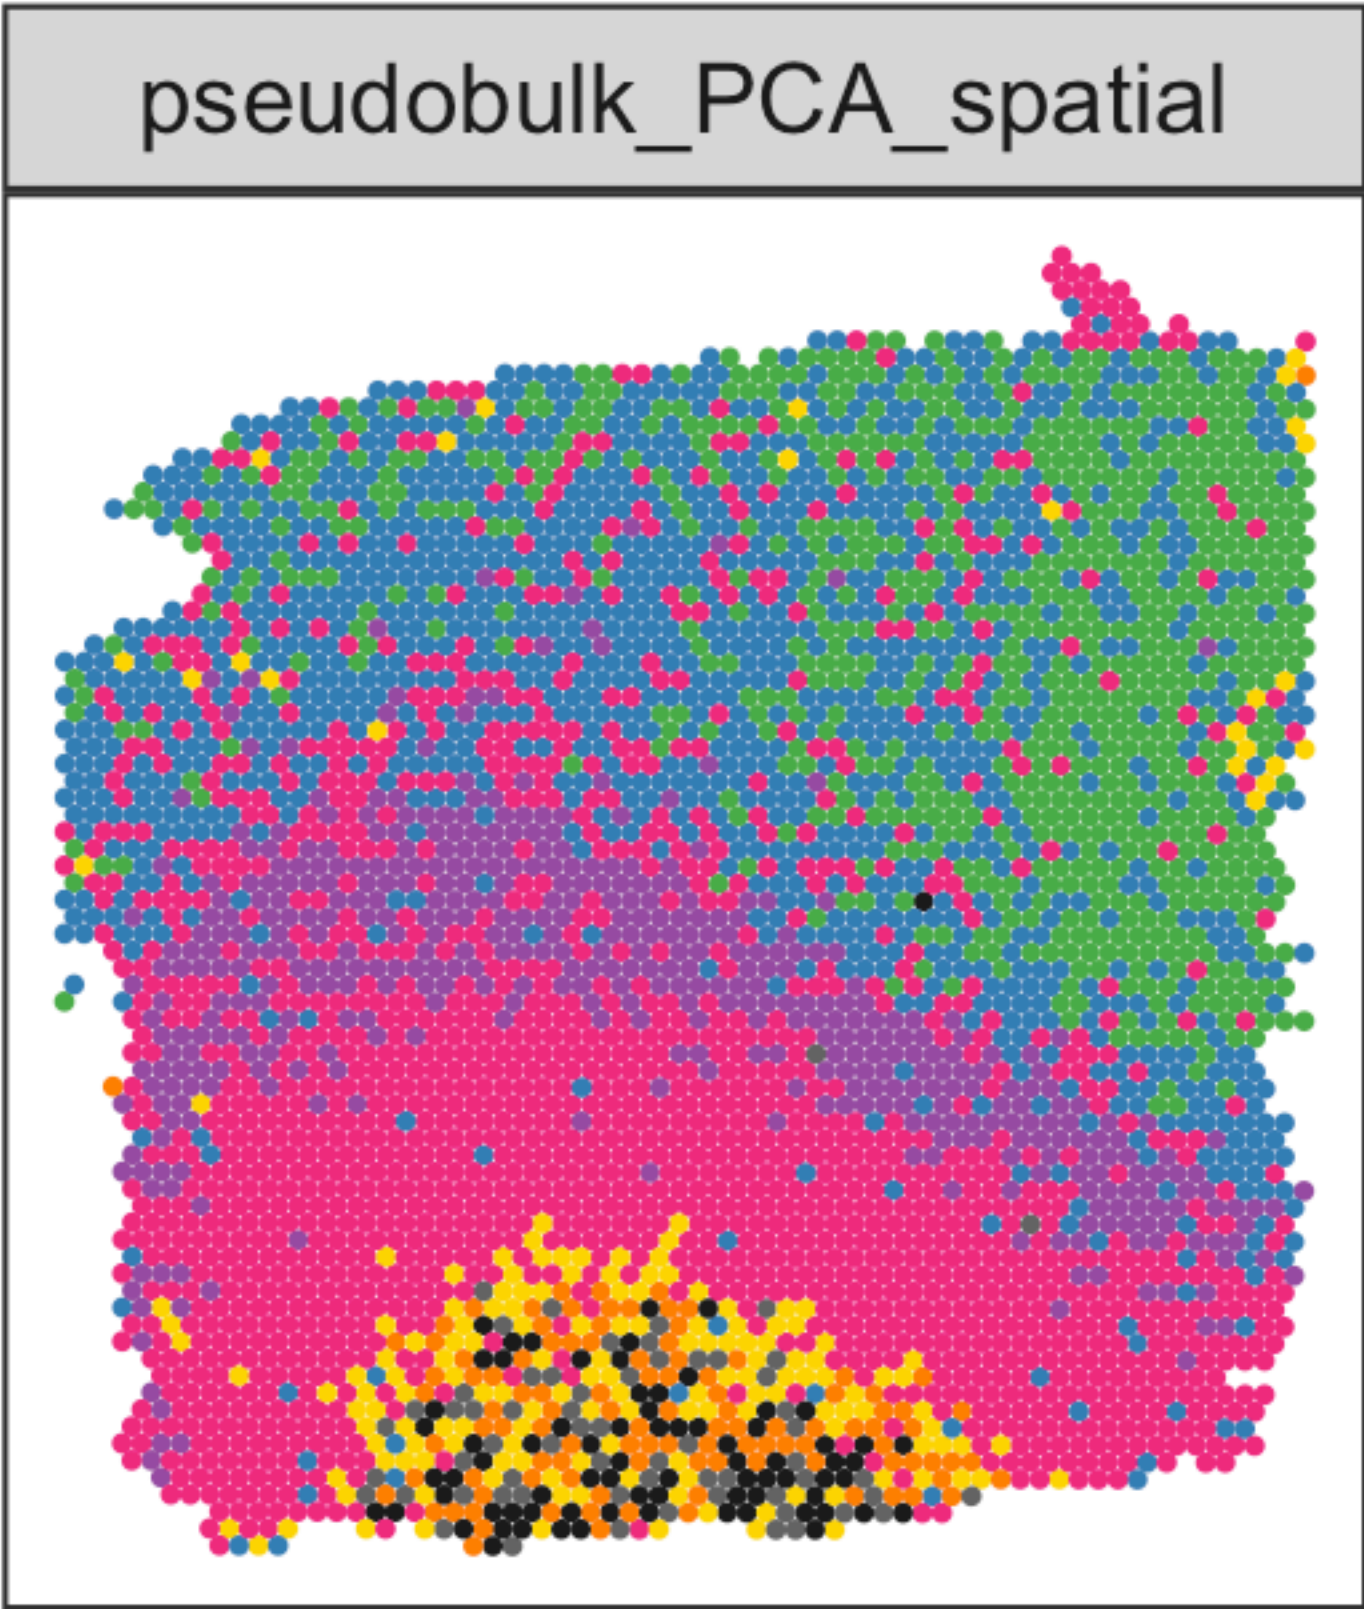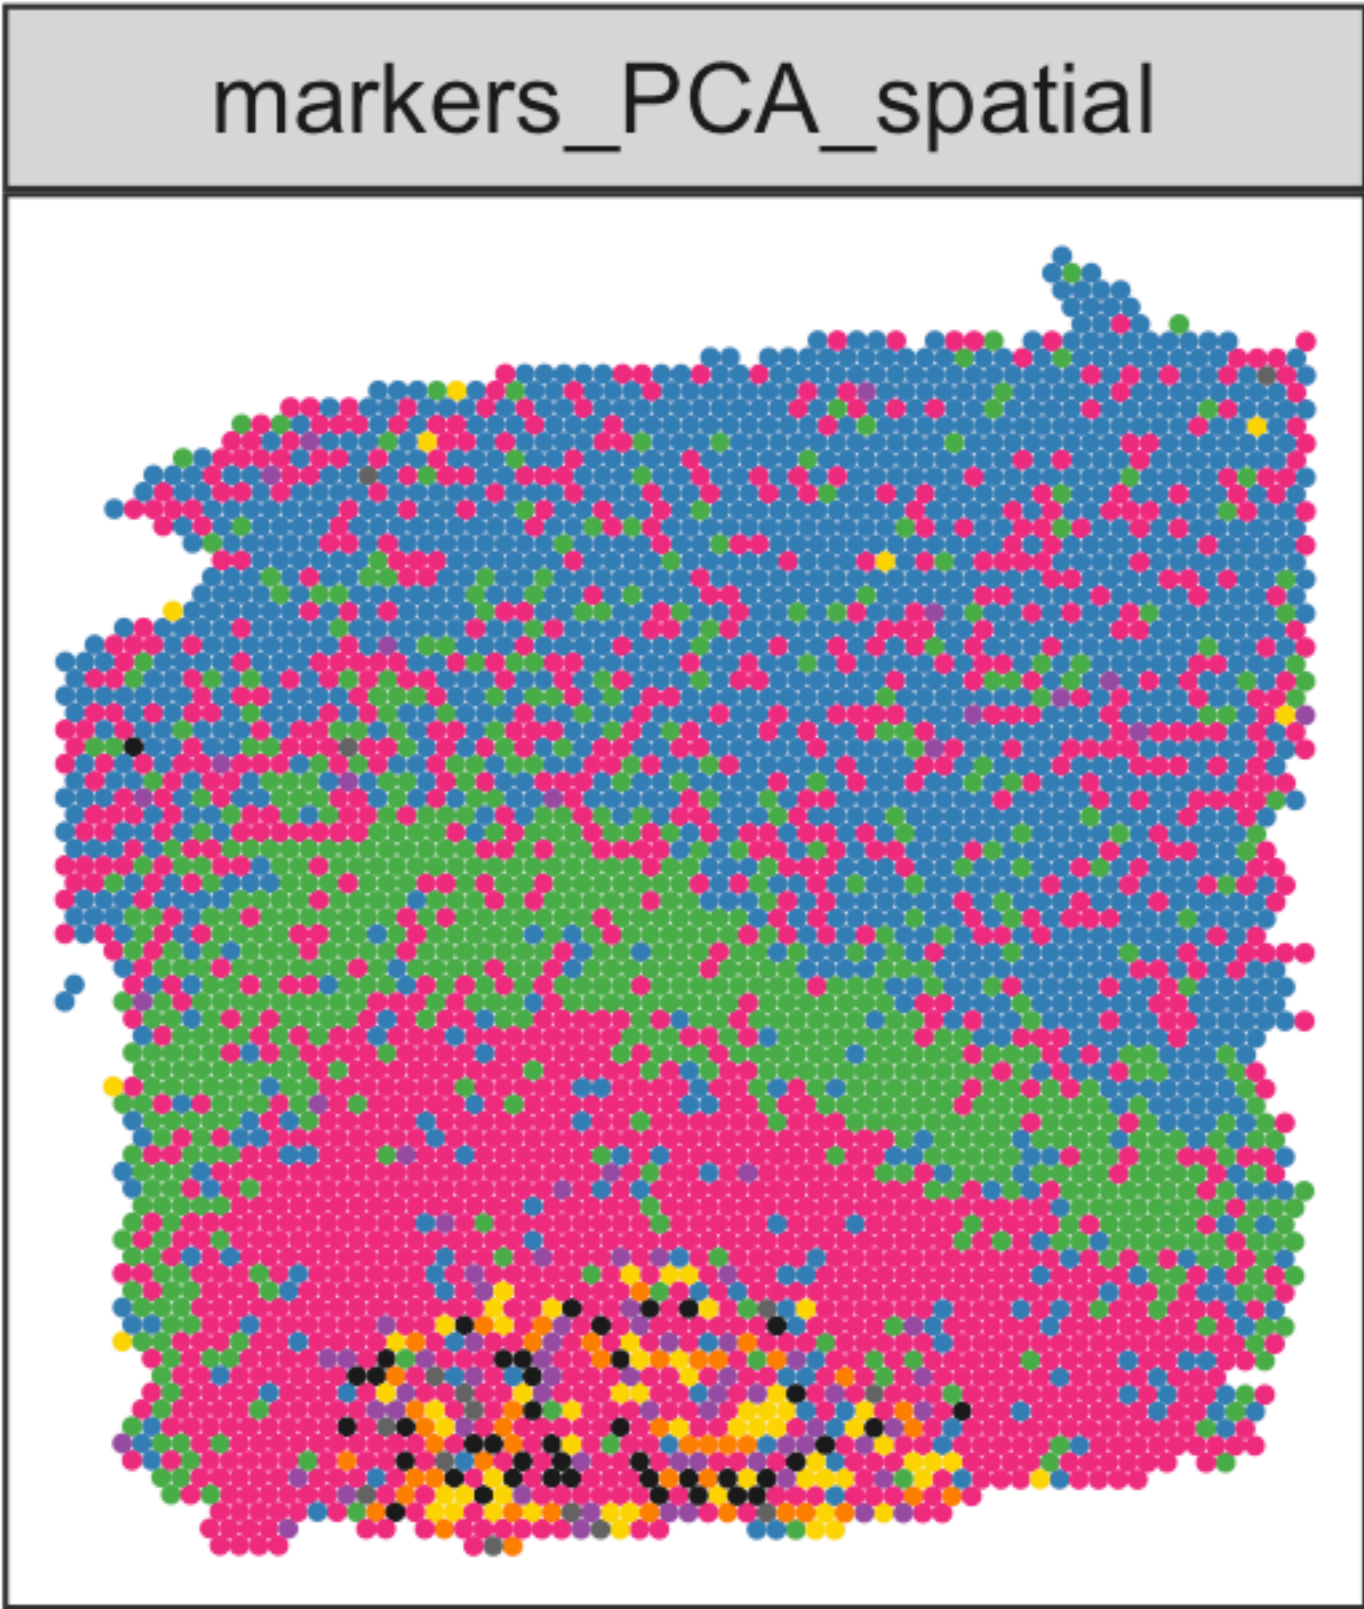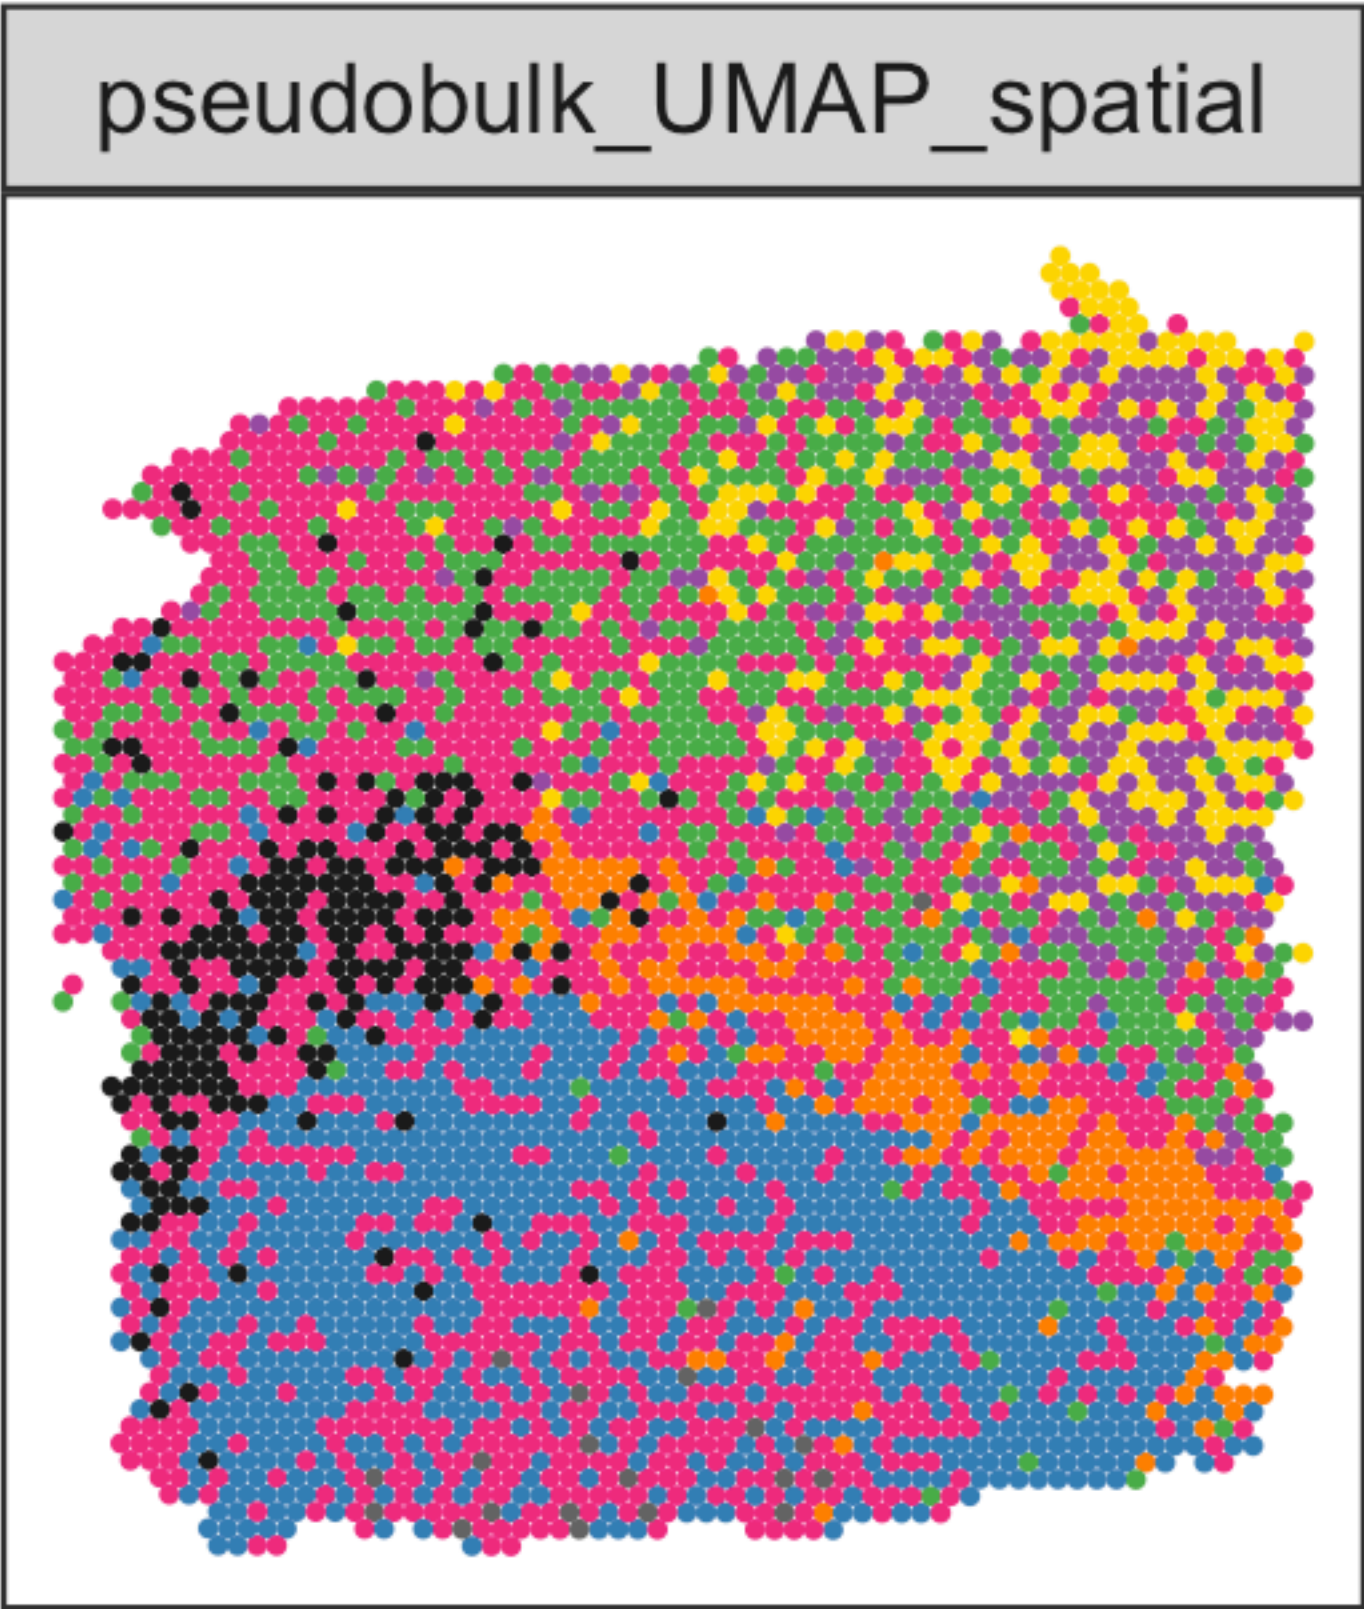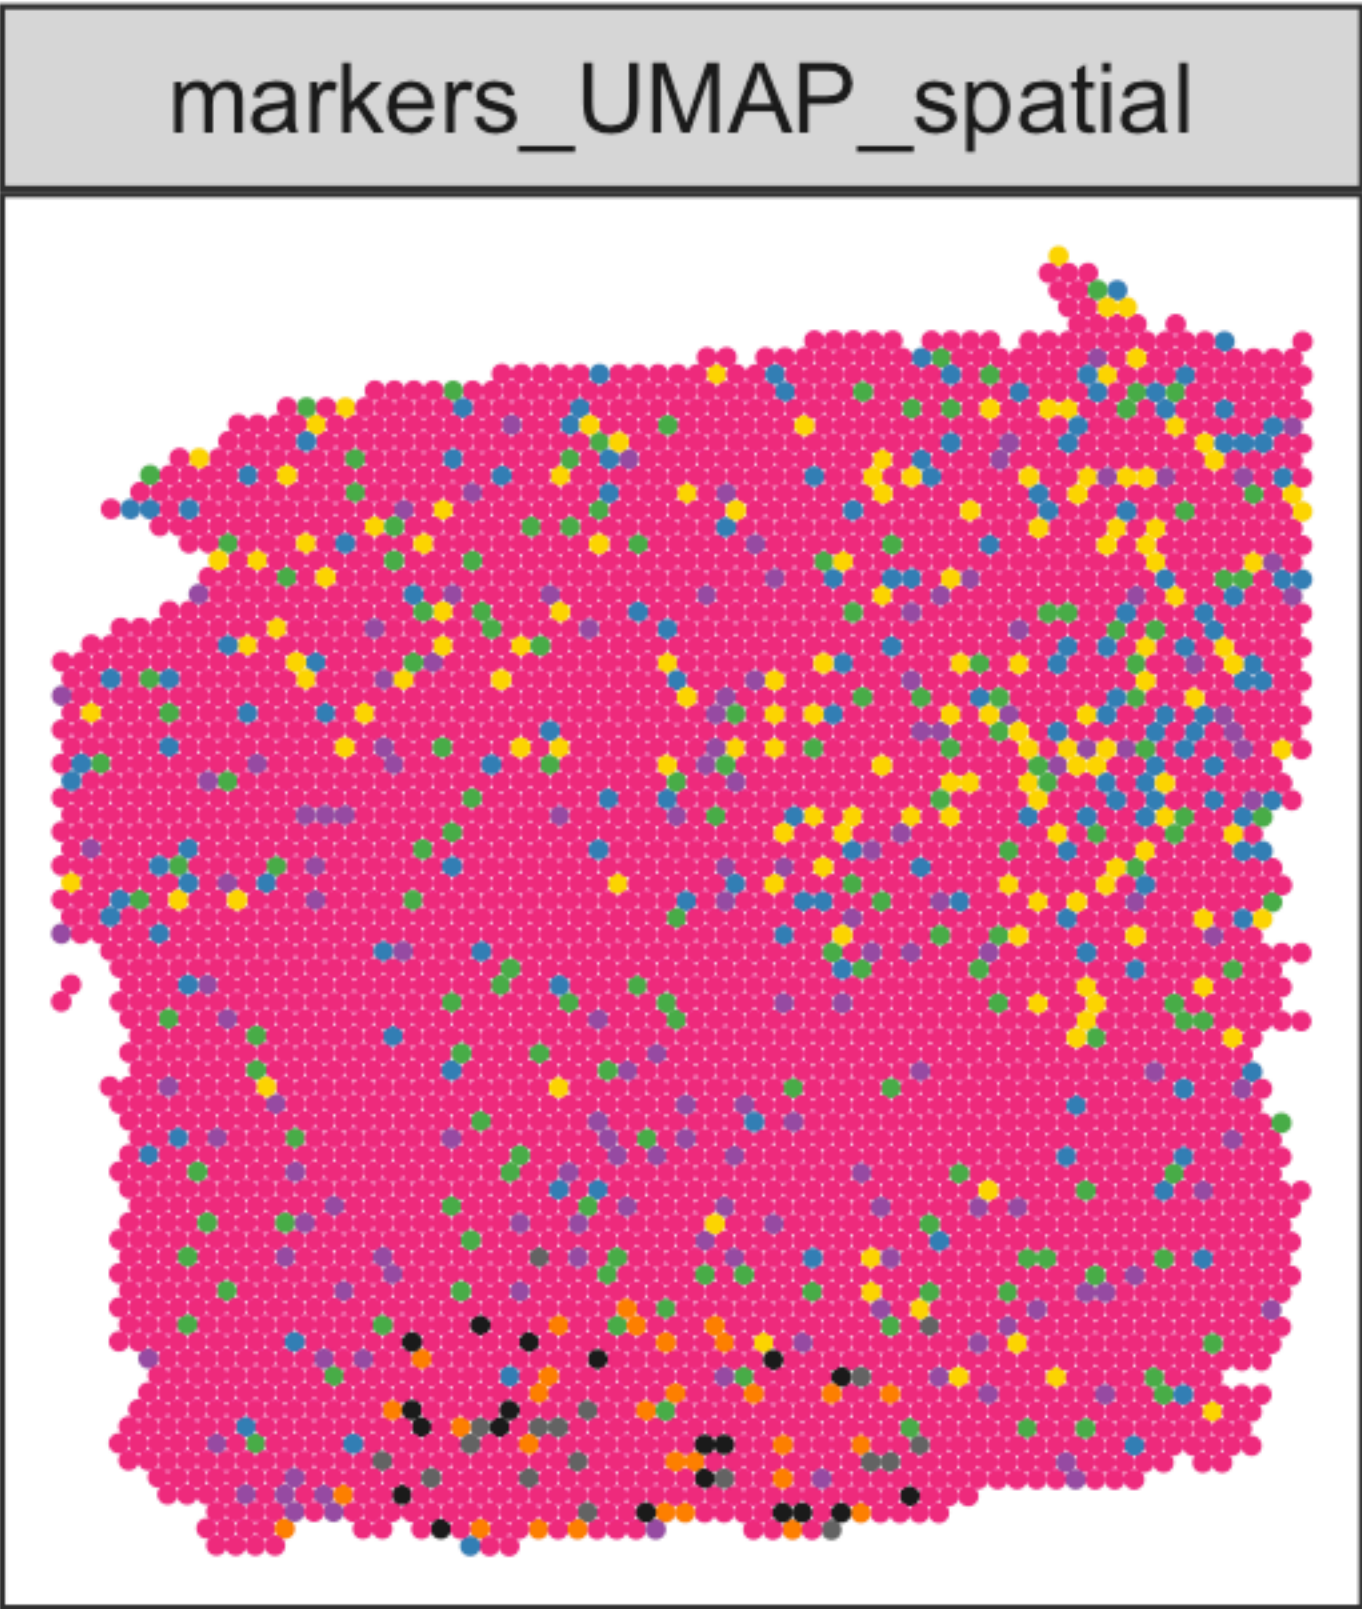



# Sample 151672: Clustering (unsupervised)

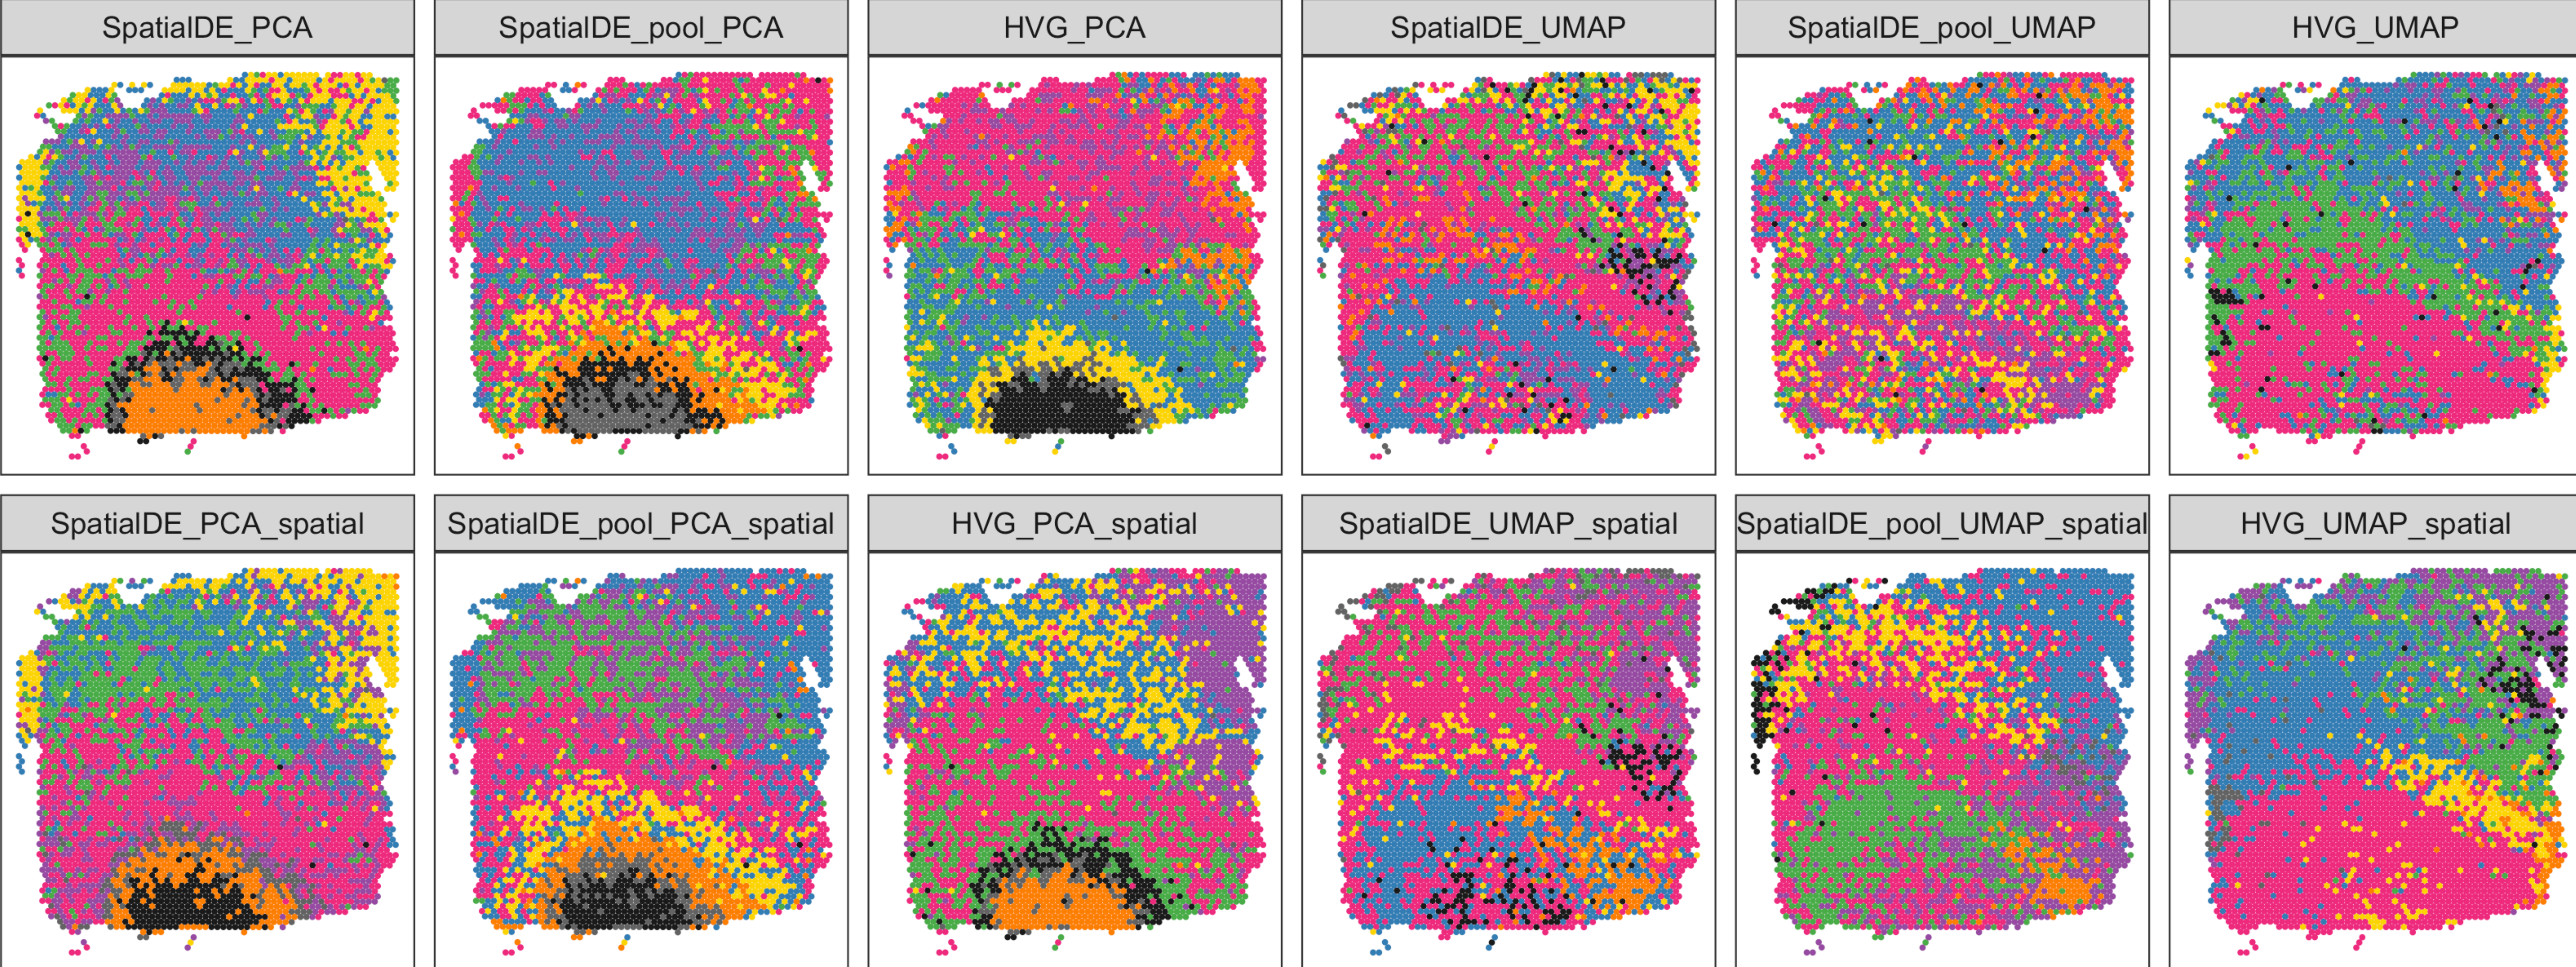



# Sample 151672: Clustering (semi-supervised and markers)

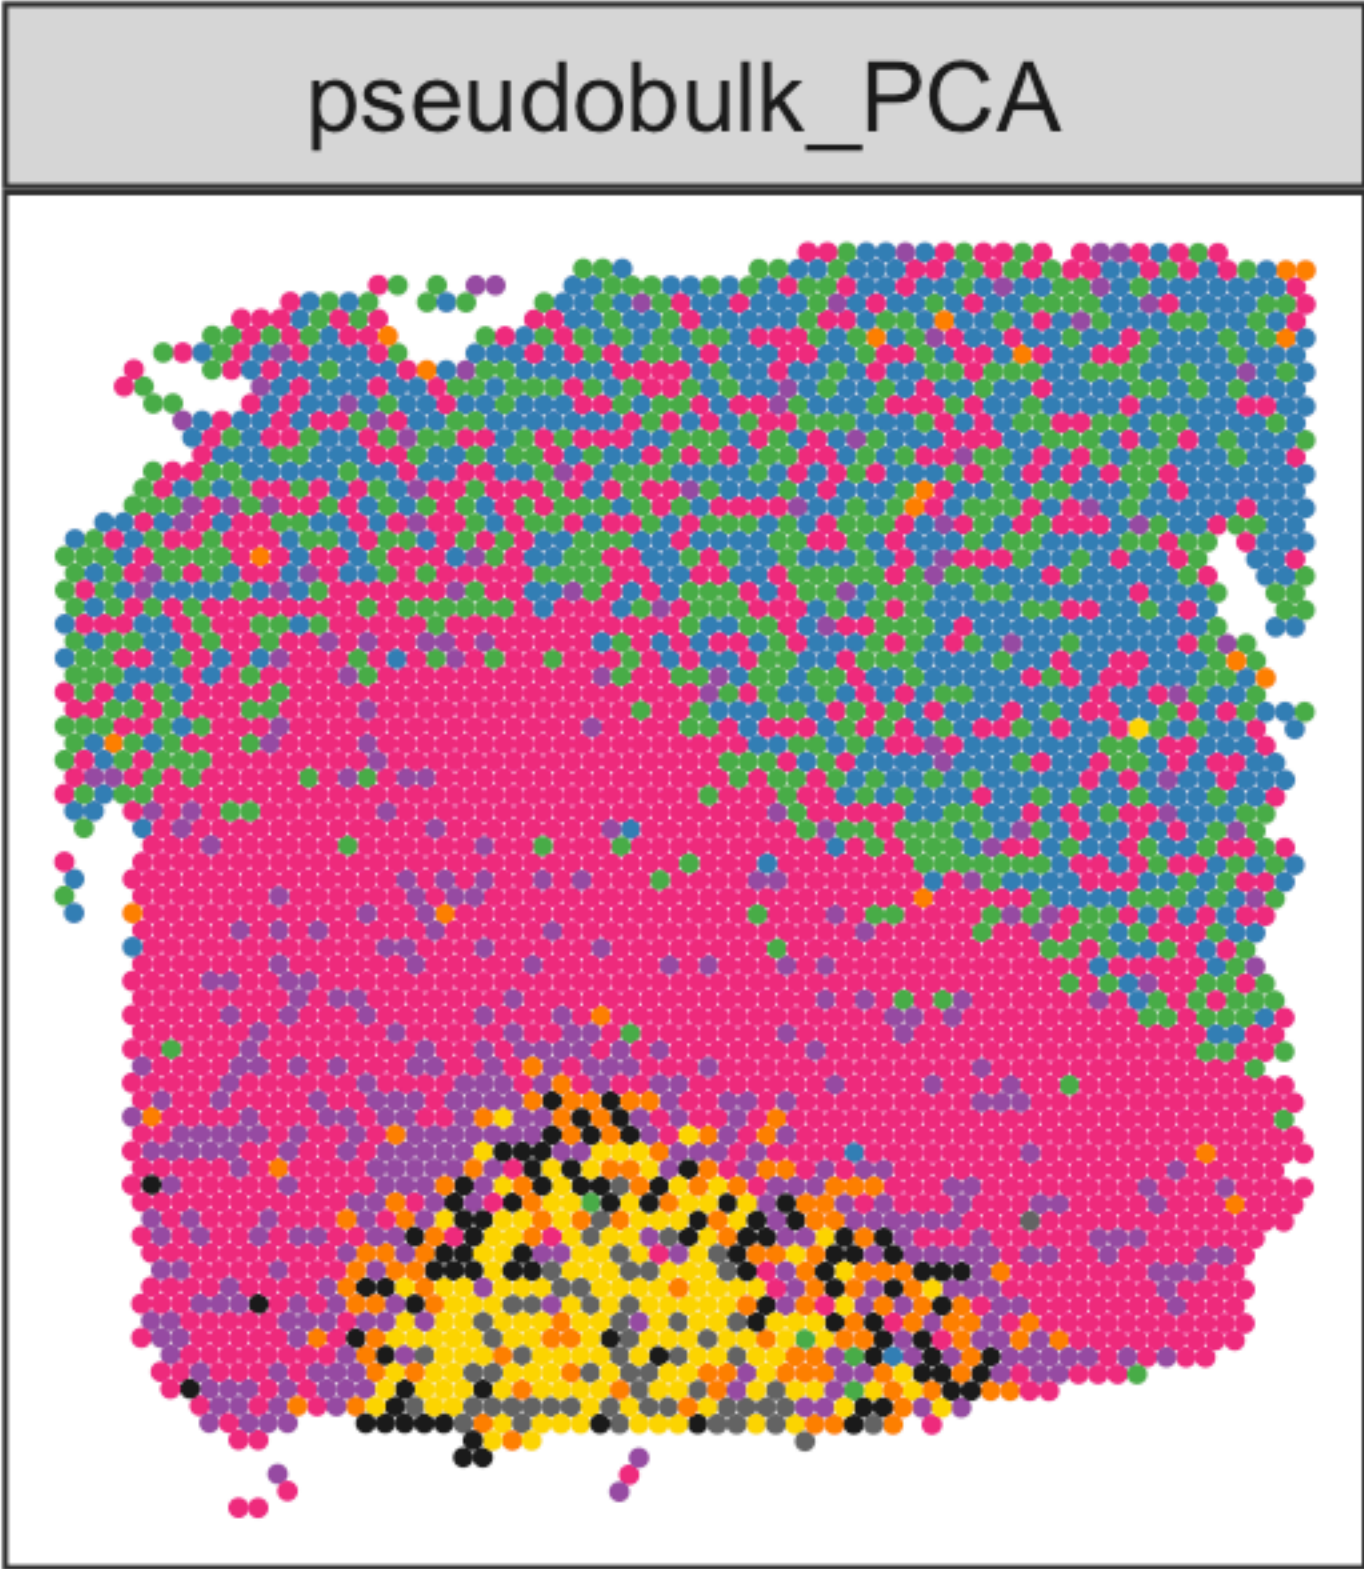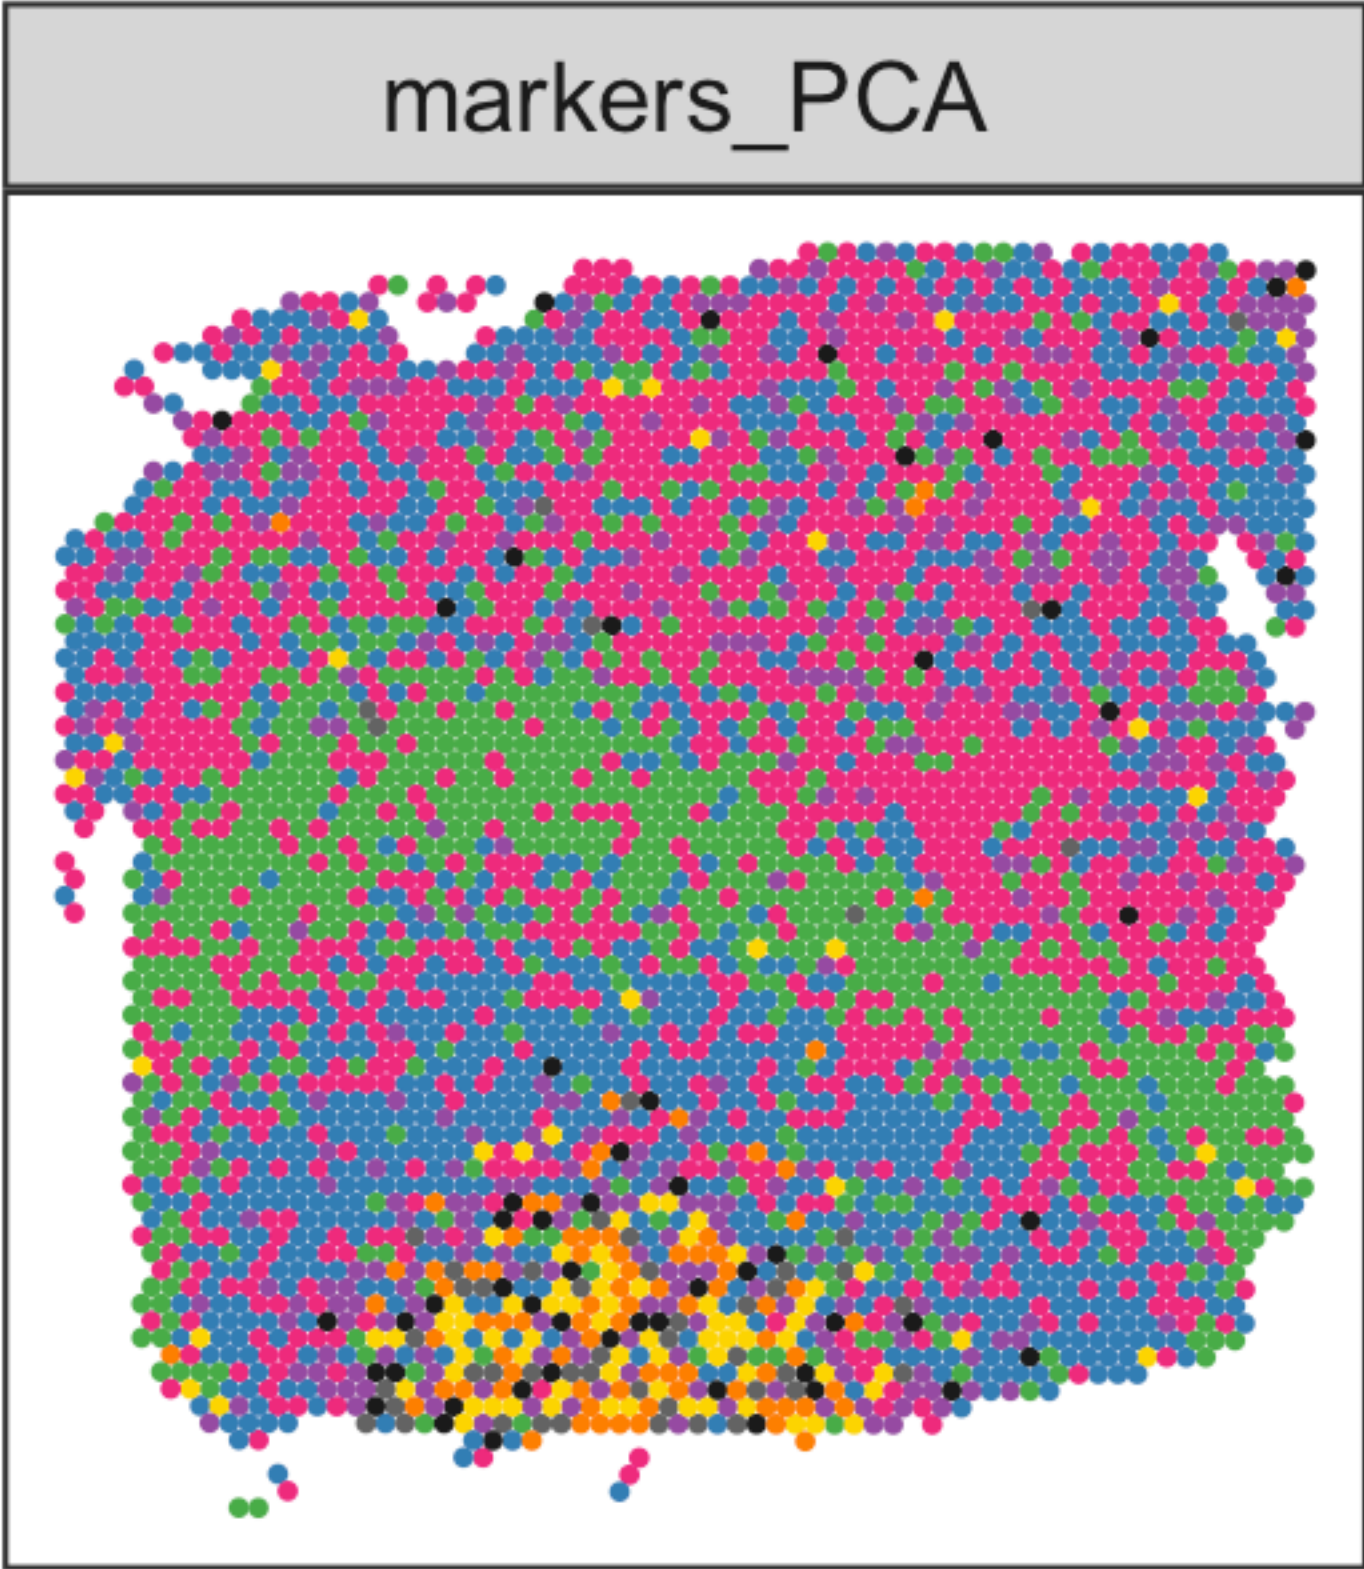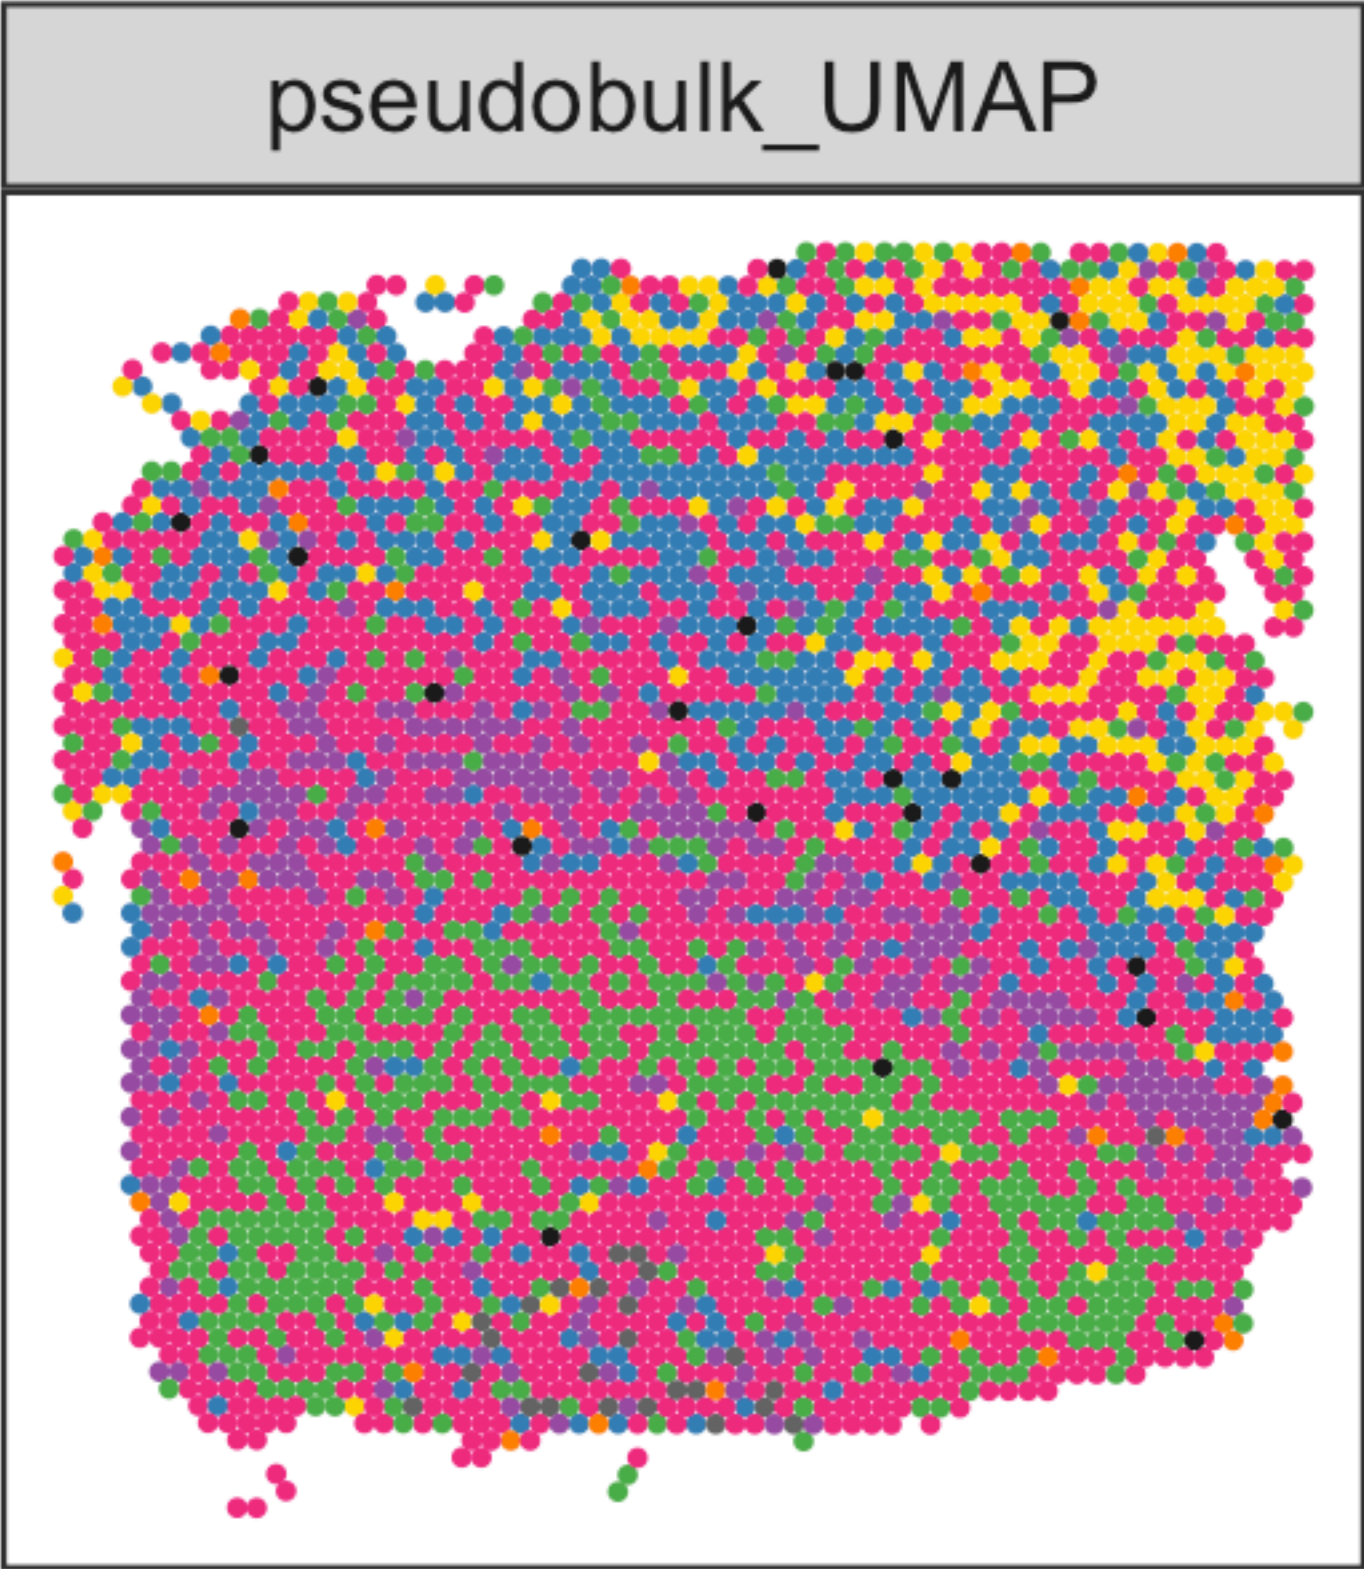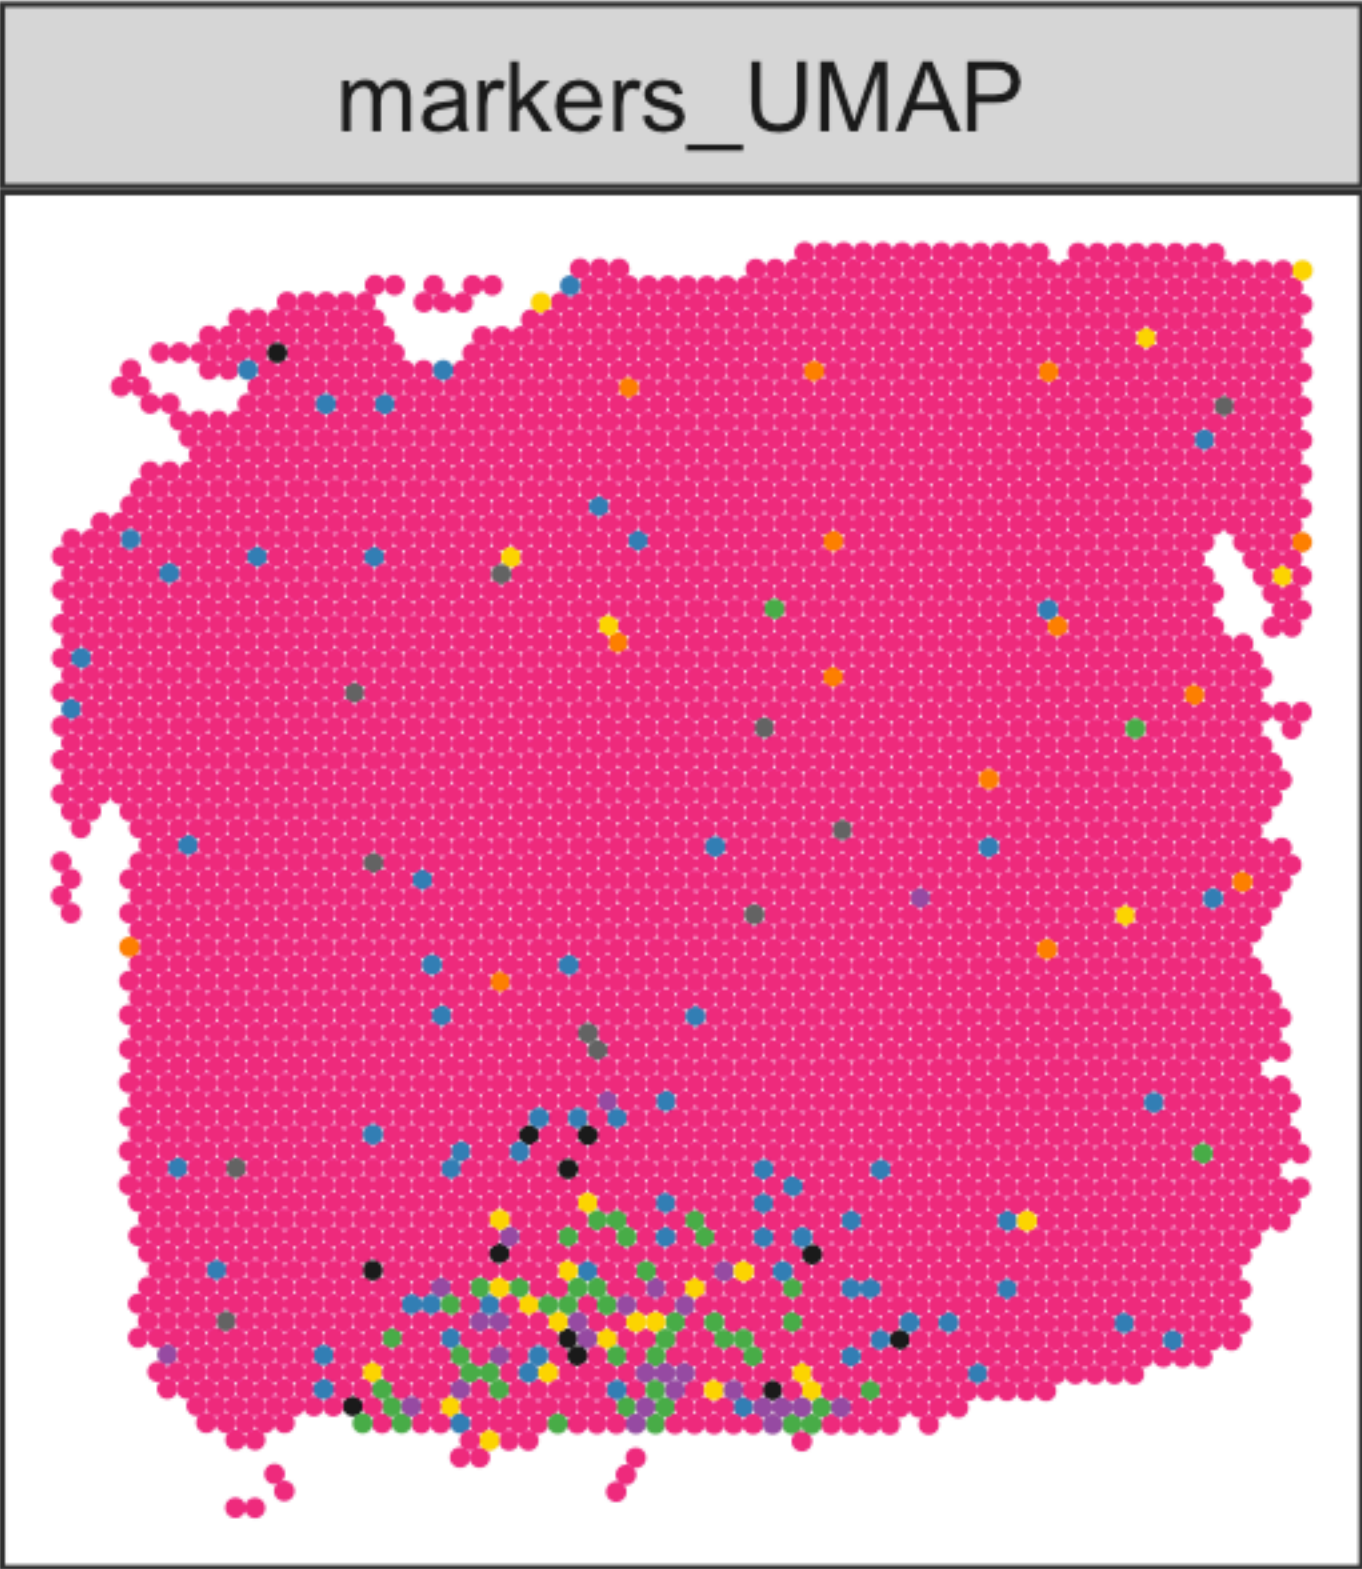

cluster

- 1
- 2
- 3
- 4
- 5
- 6
- 7
- 8

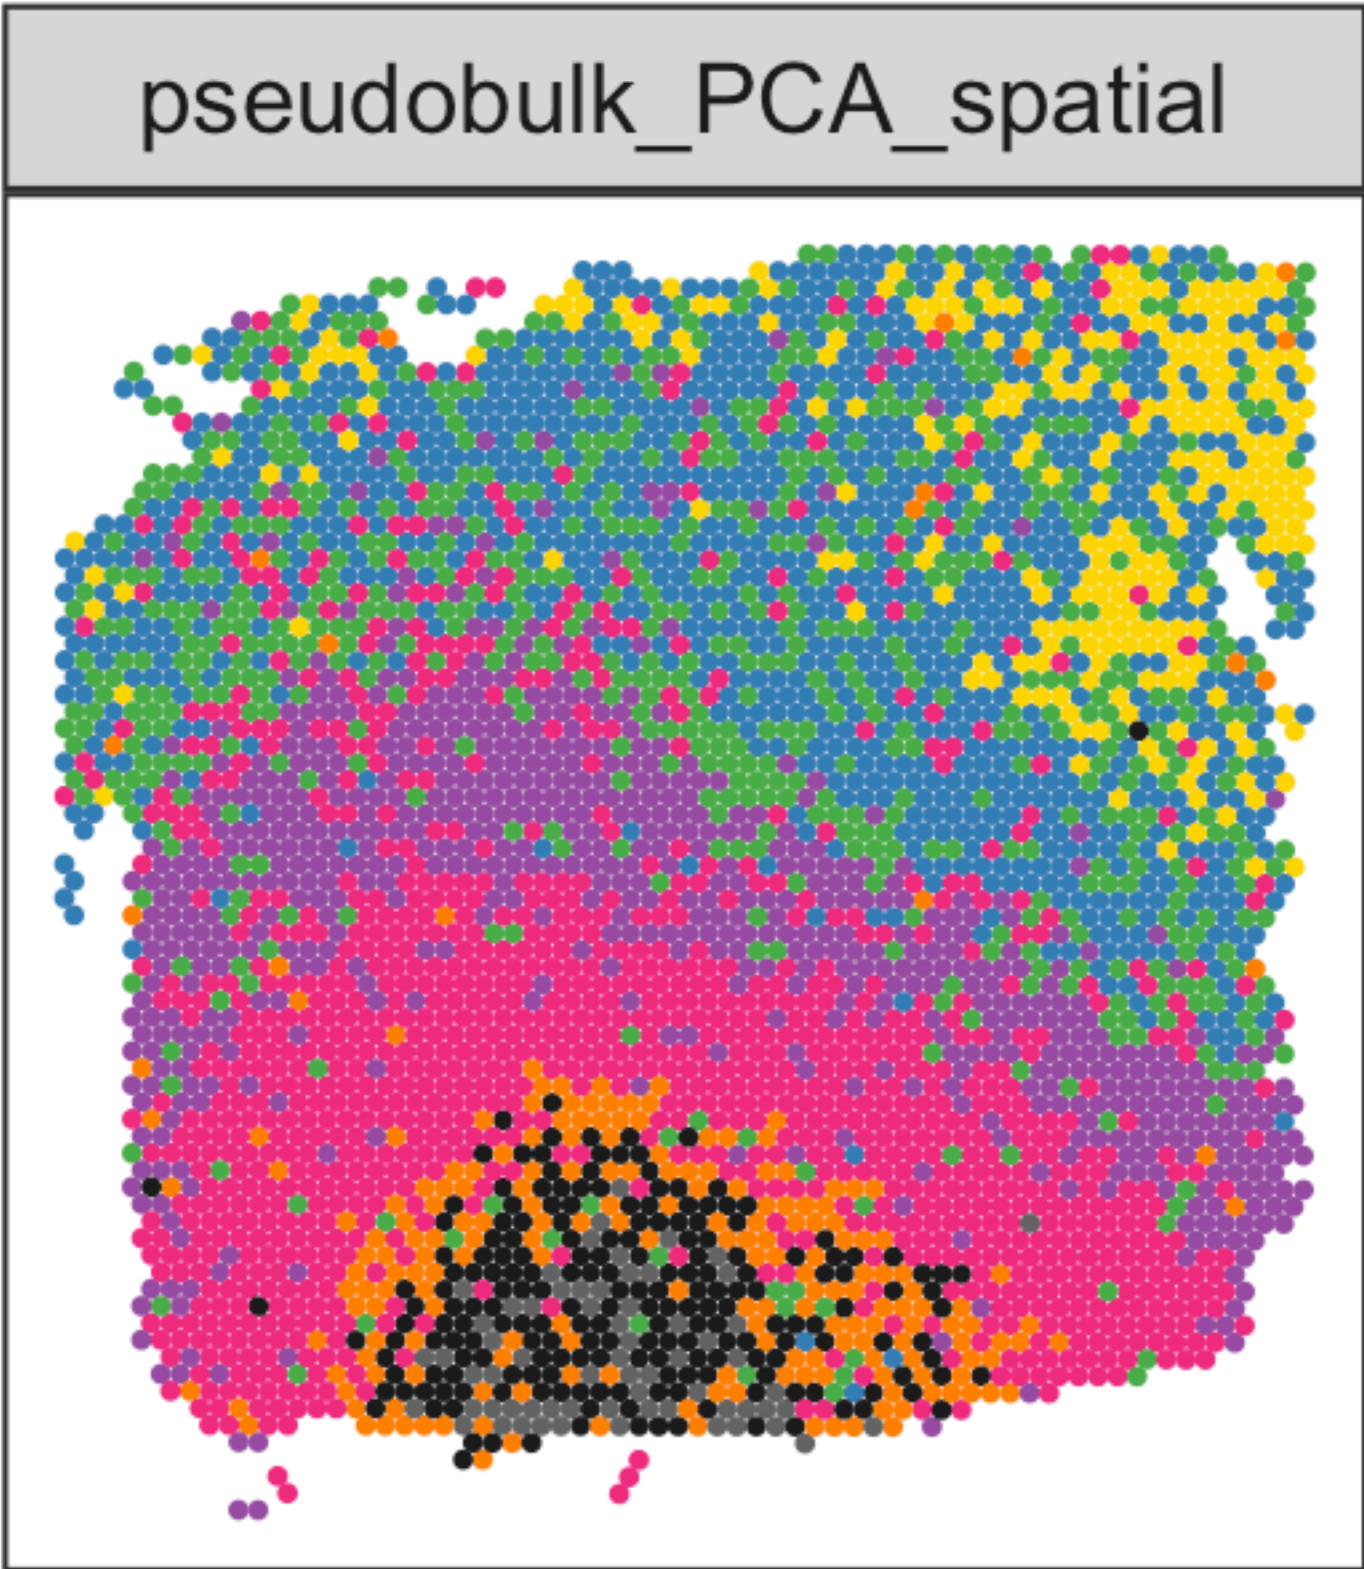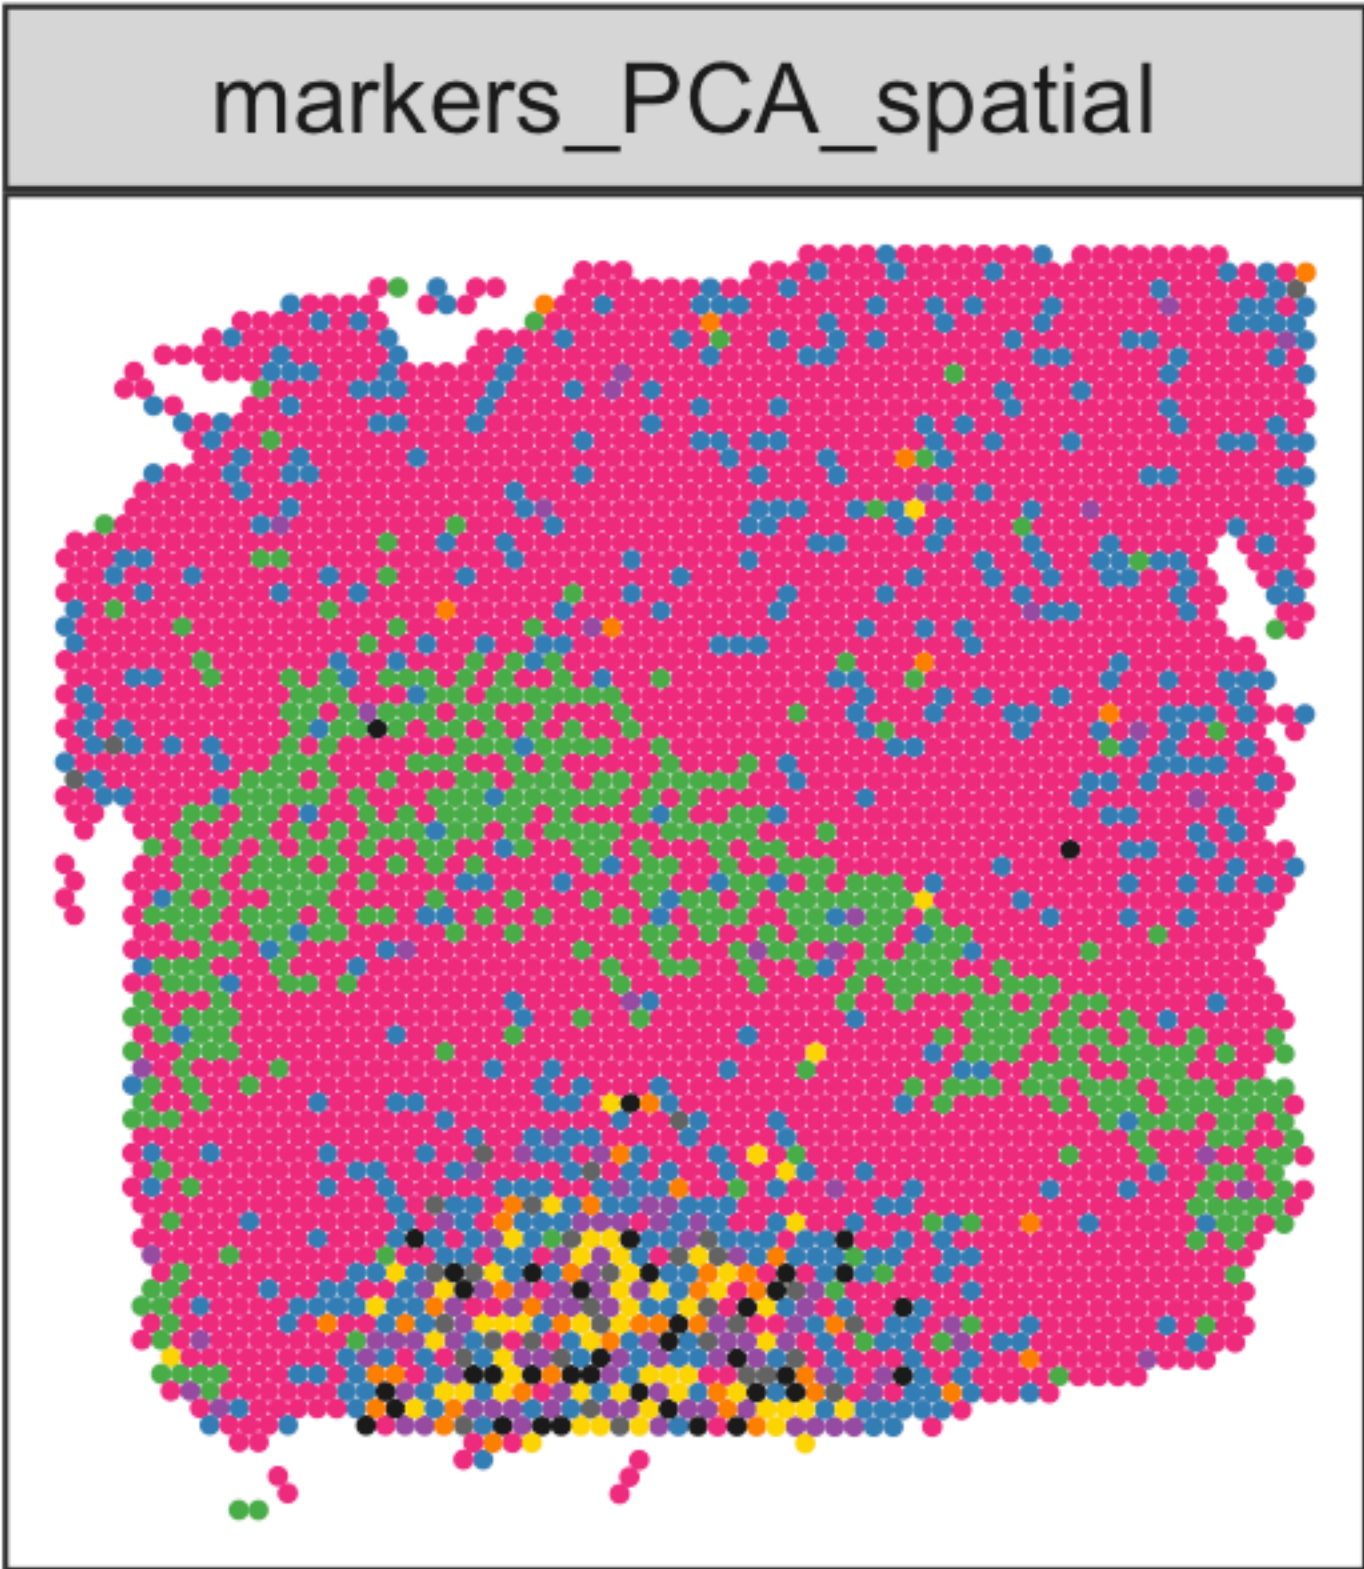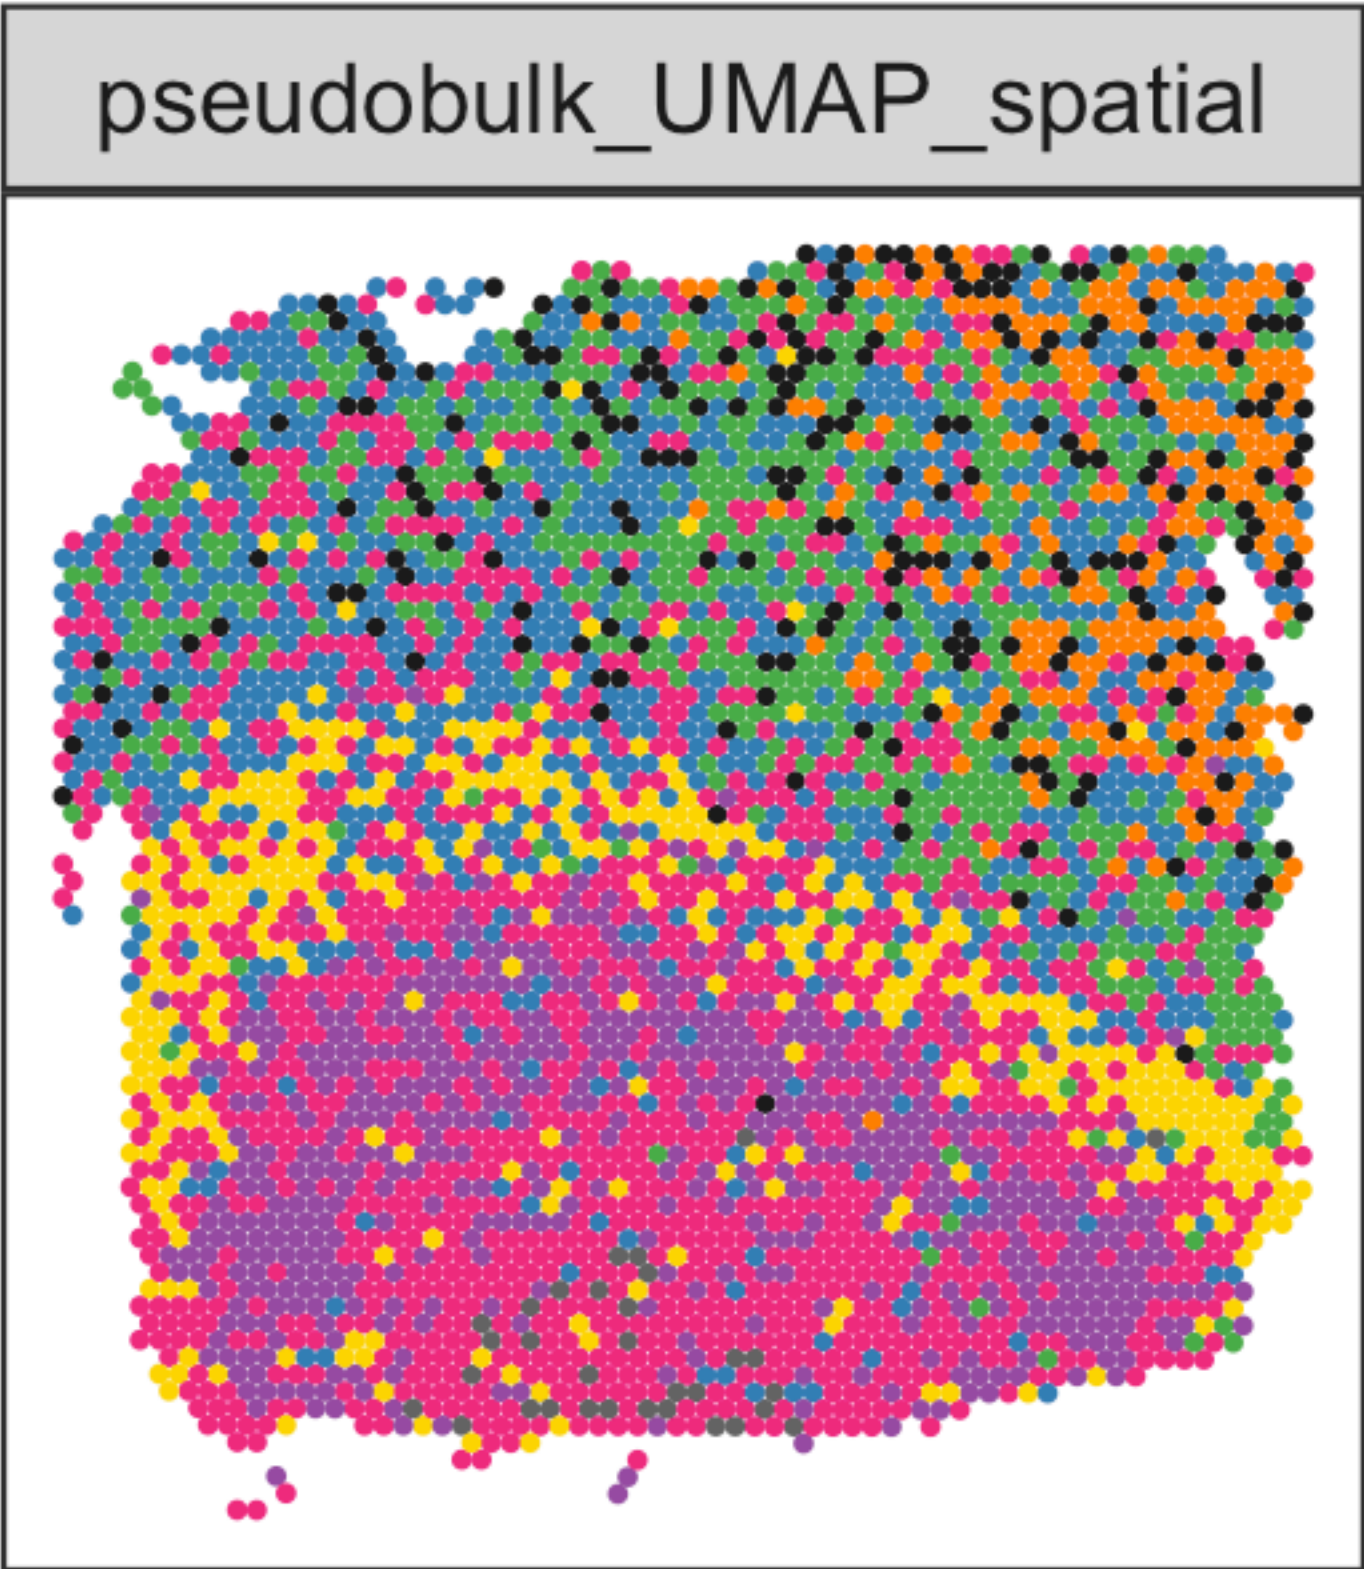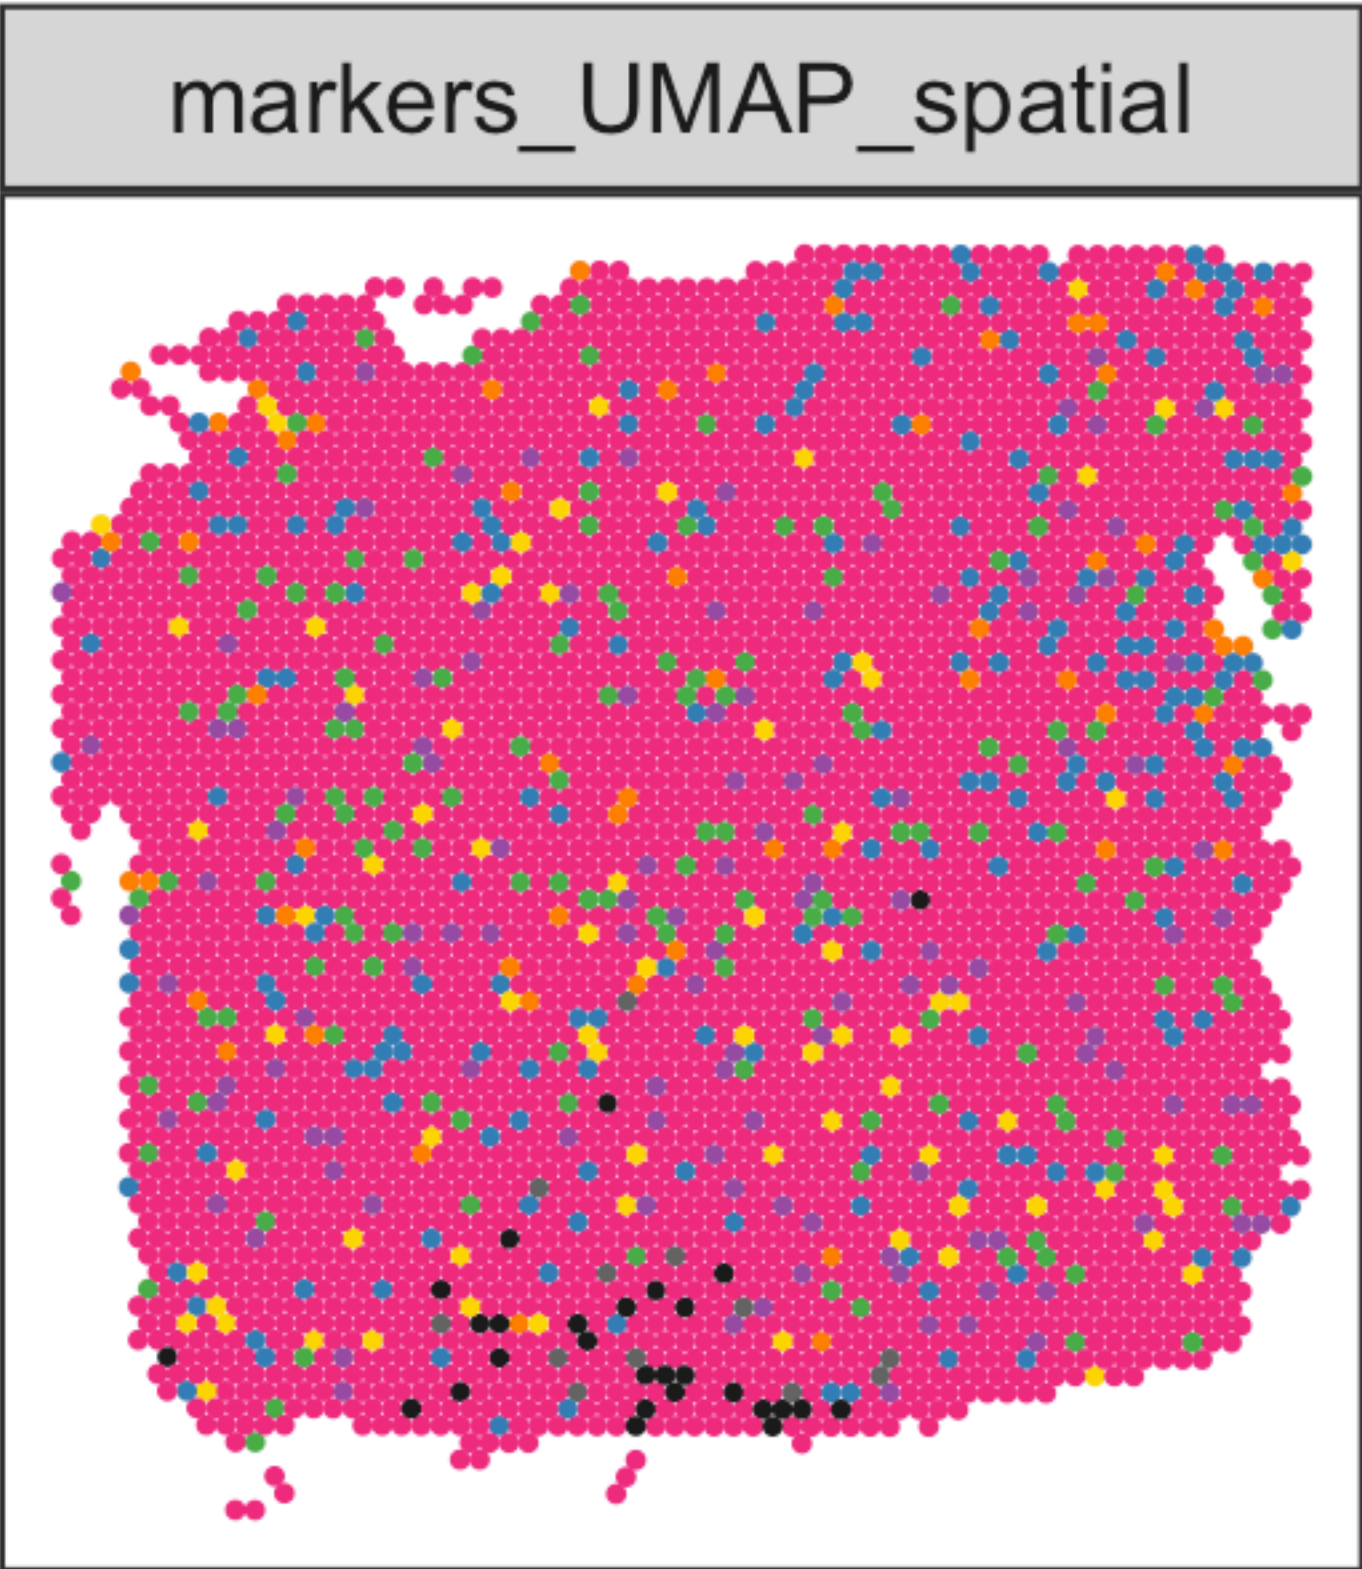



# Sample 151673: Clustering (unsupervised)

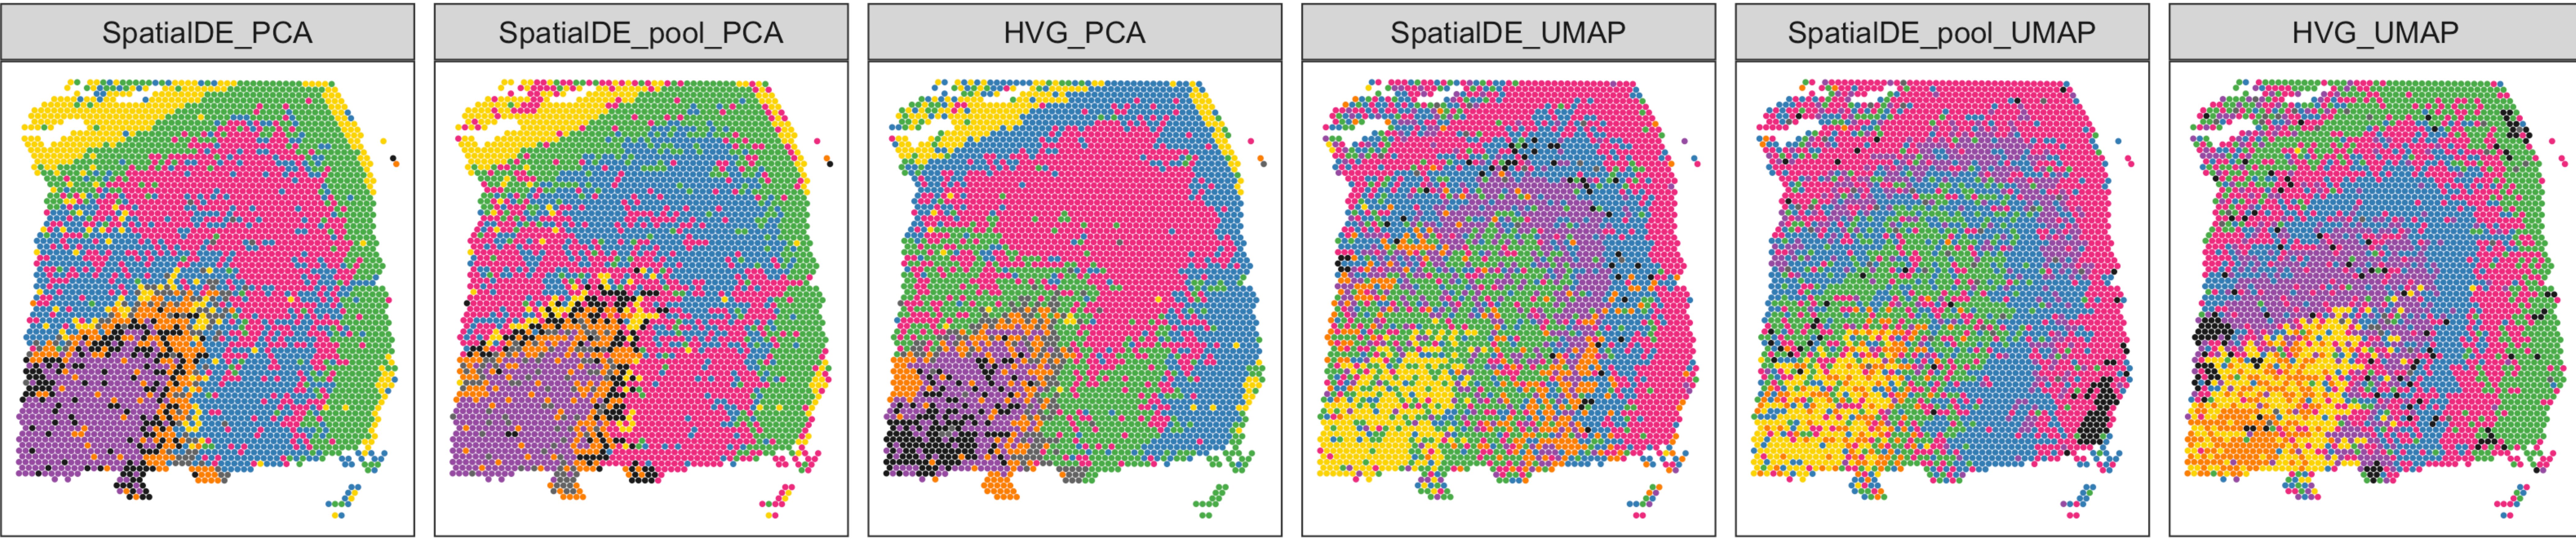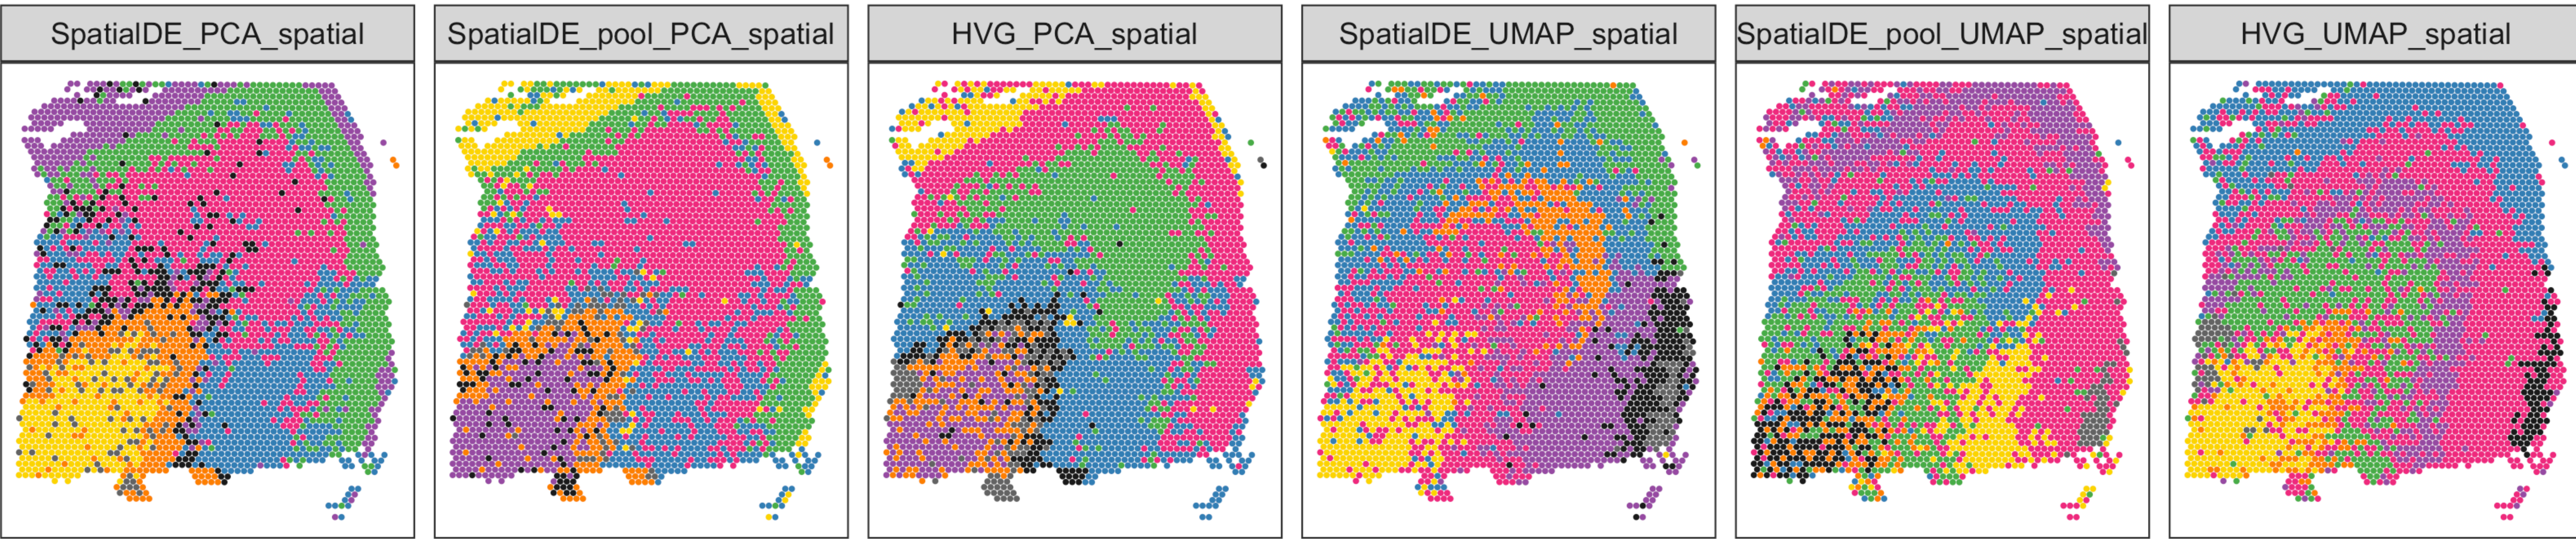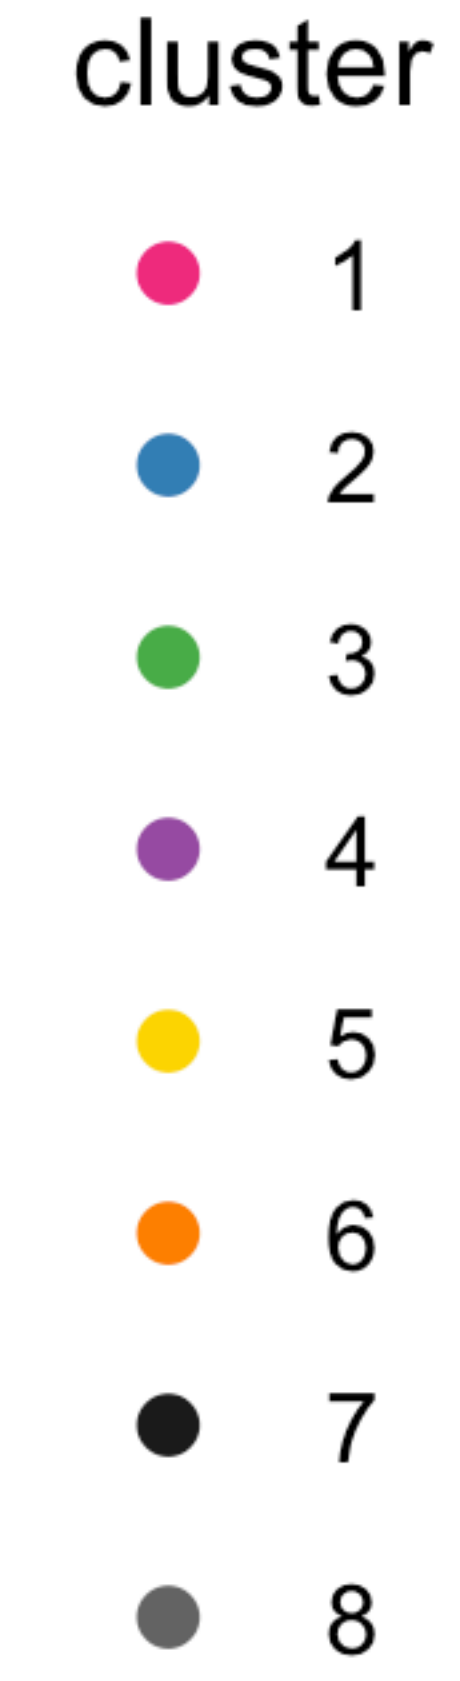



# Sample 151673: Clustering (semi-supervised and markers)

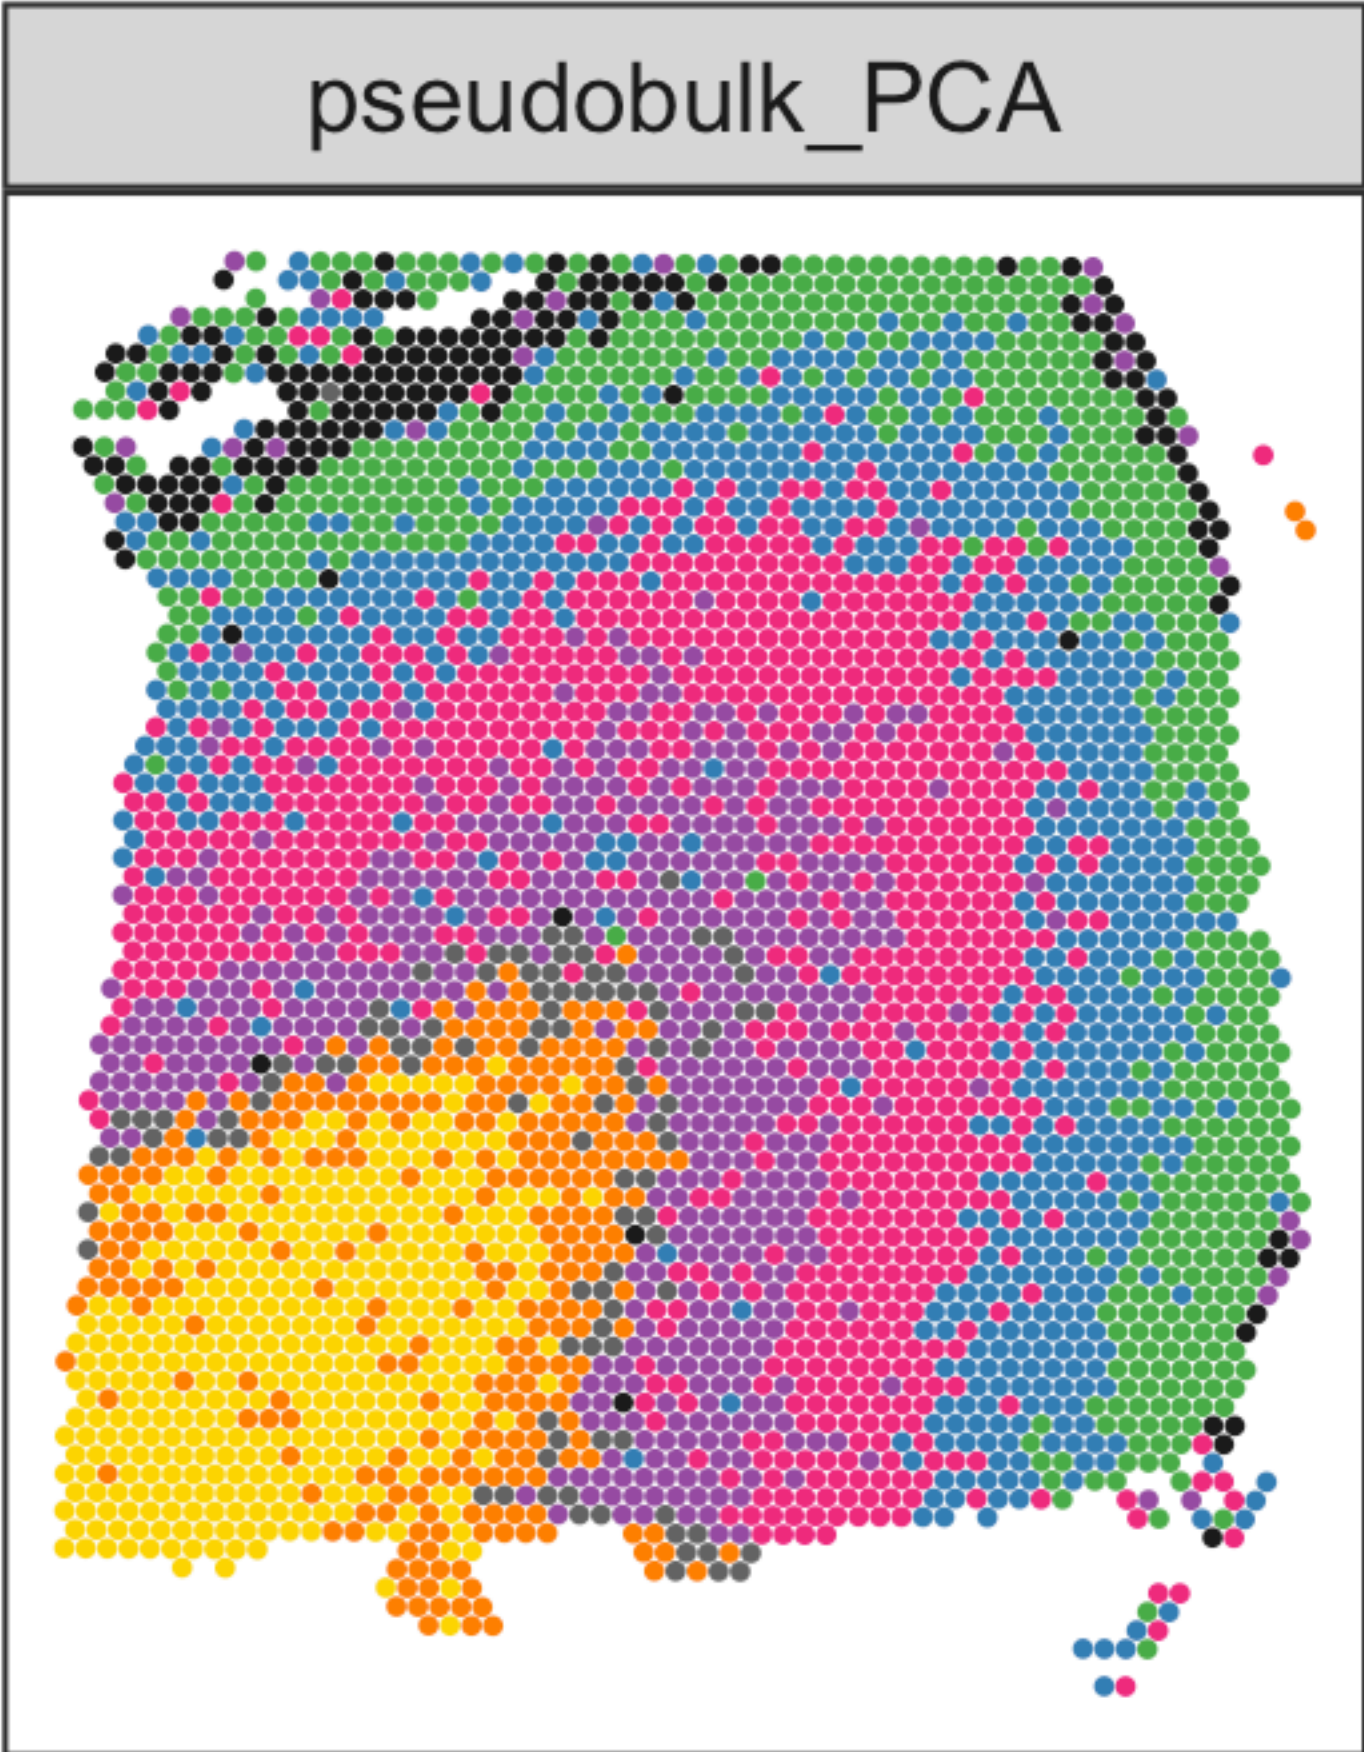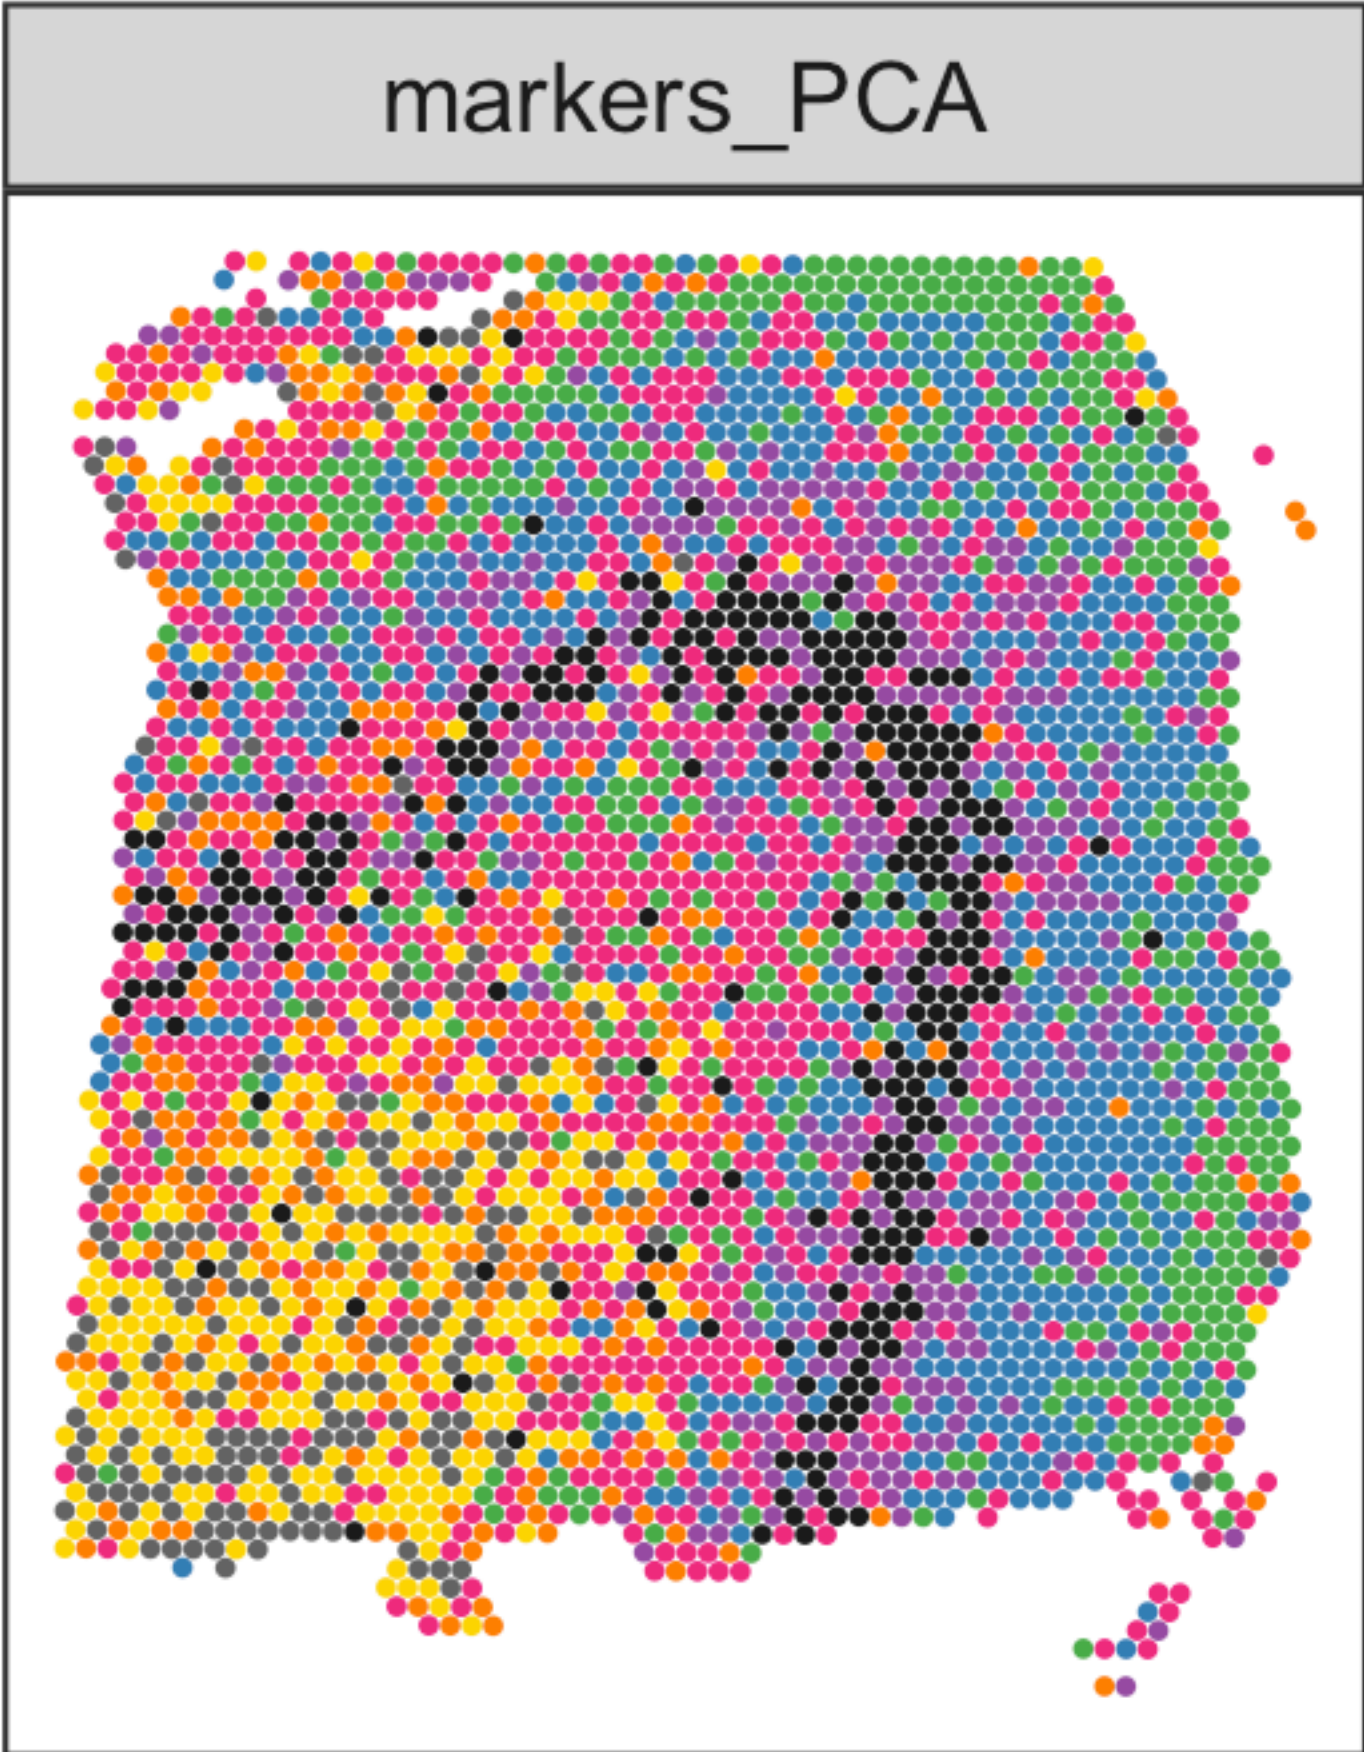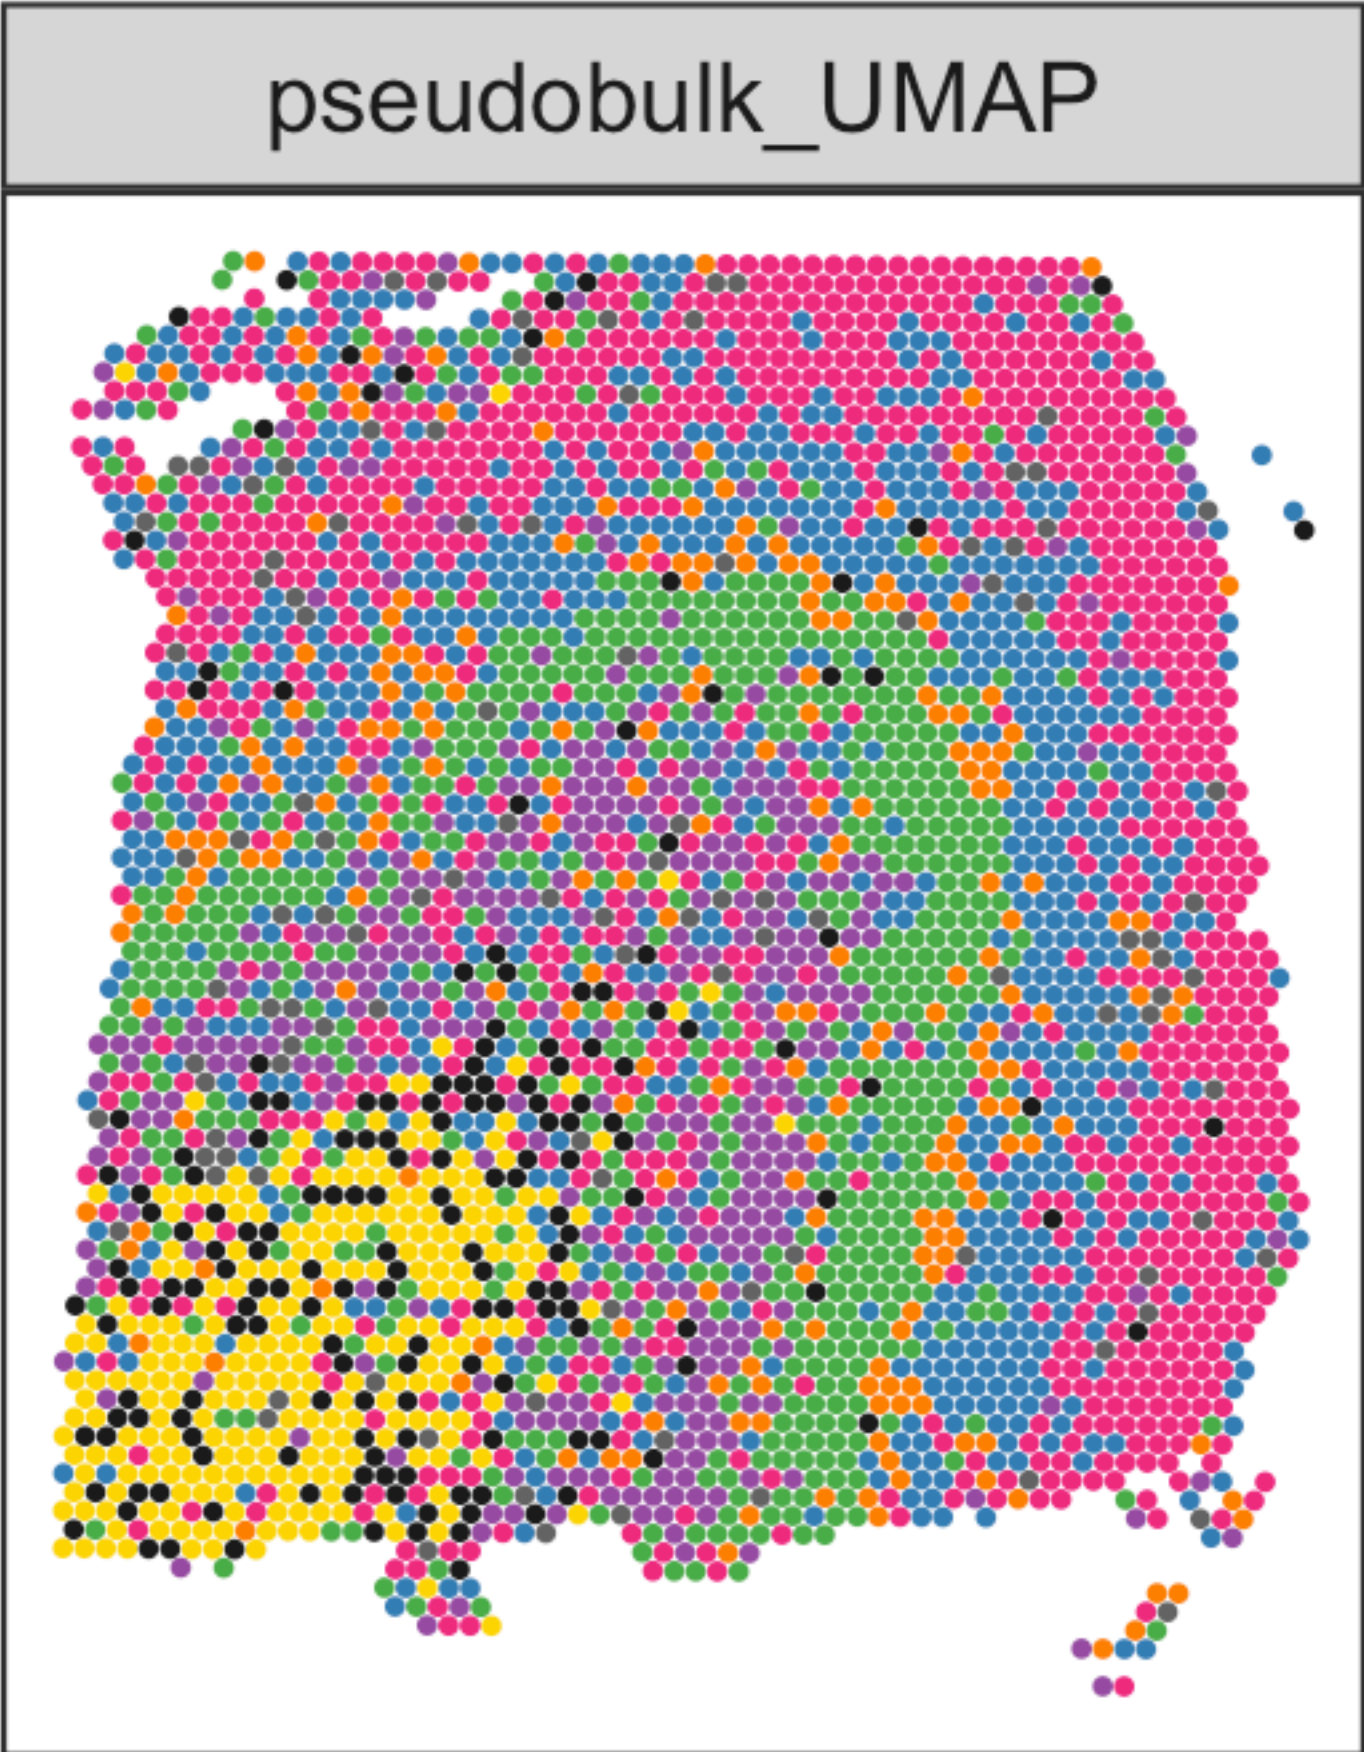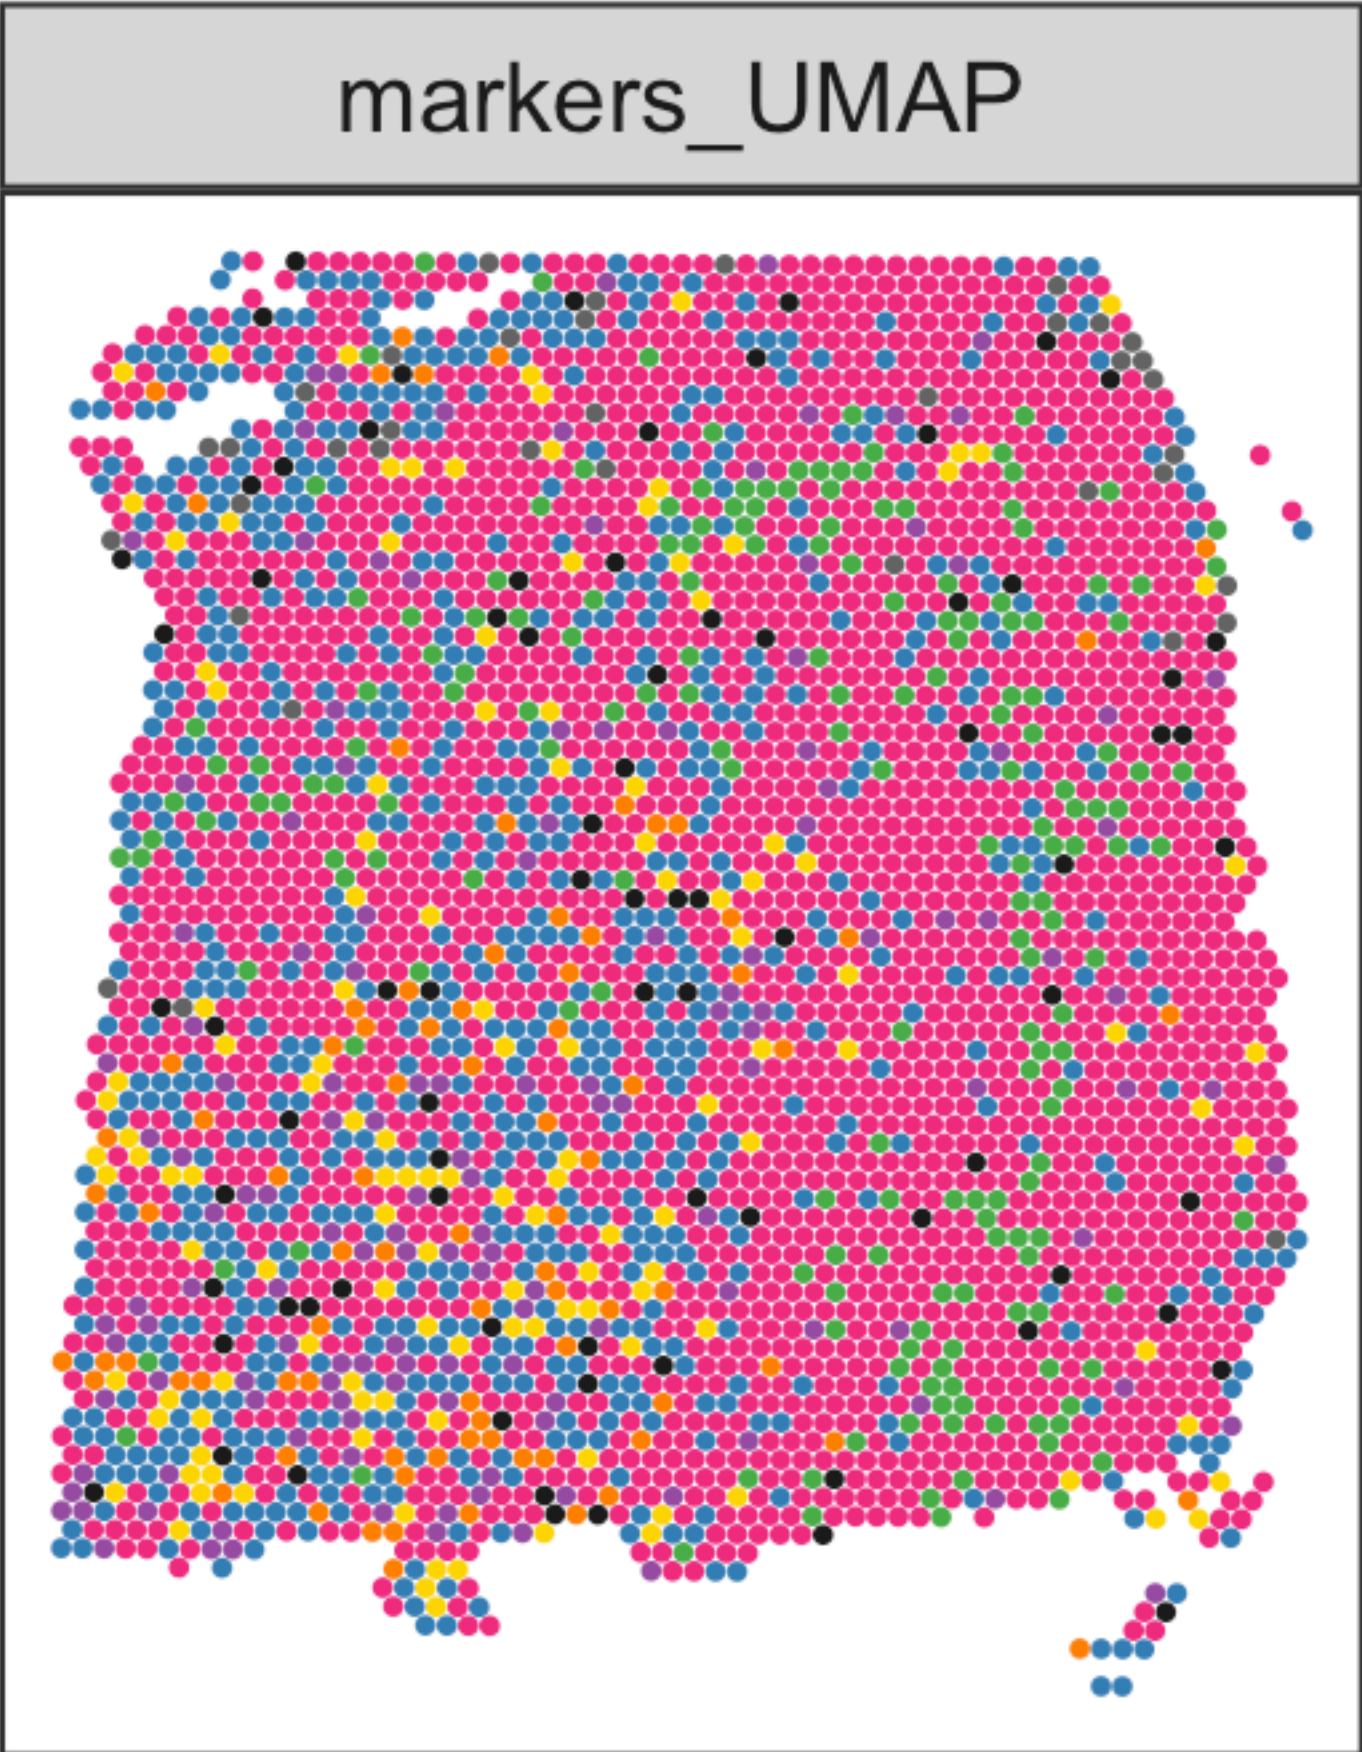

cluster

- 1
- 2
- 3
- 4
- 5
- 6
- 7
- 8

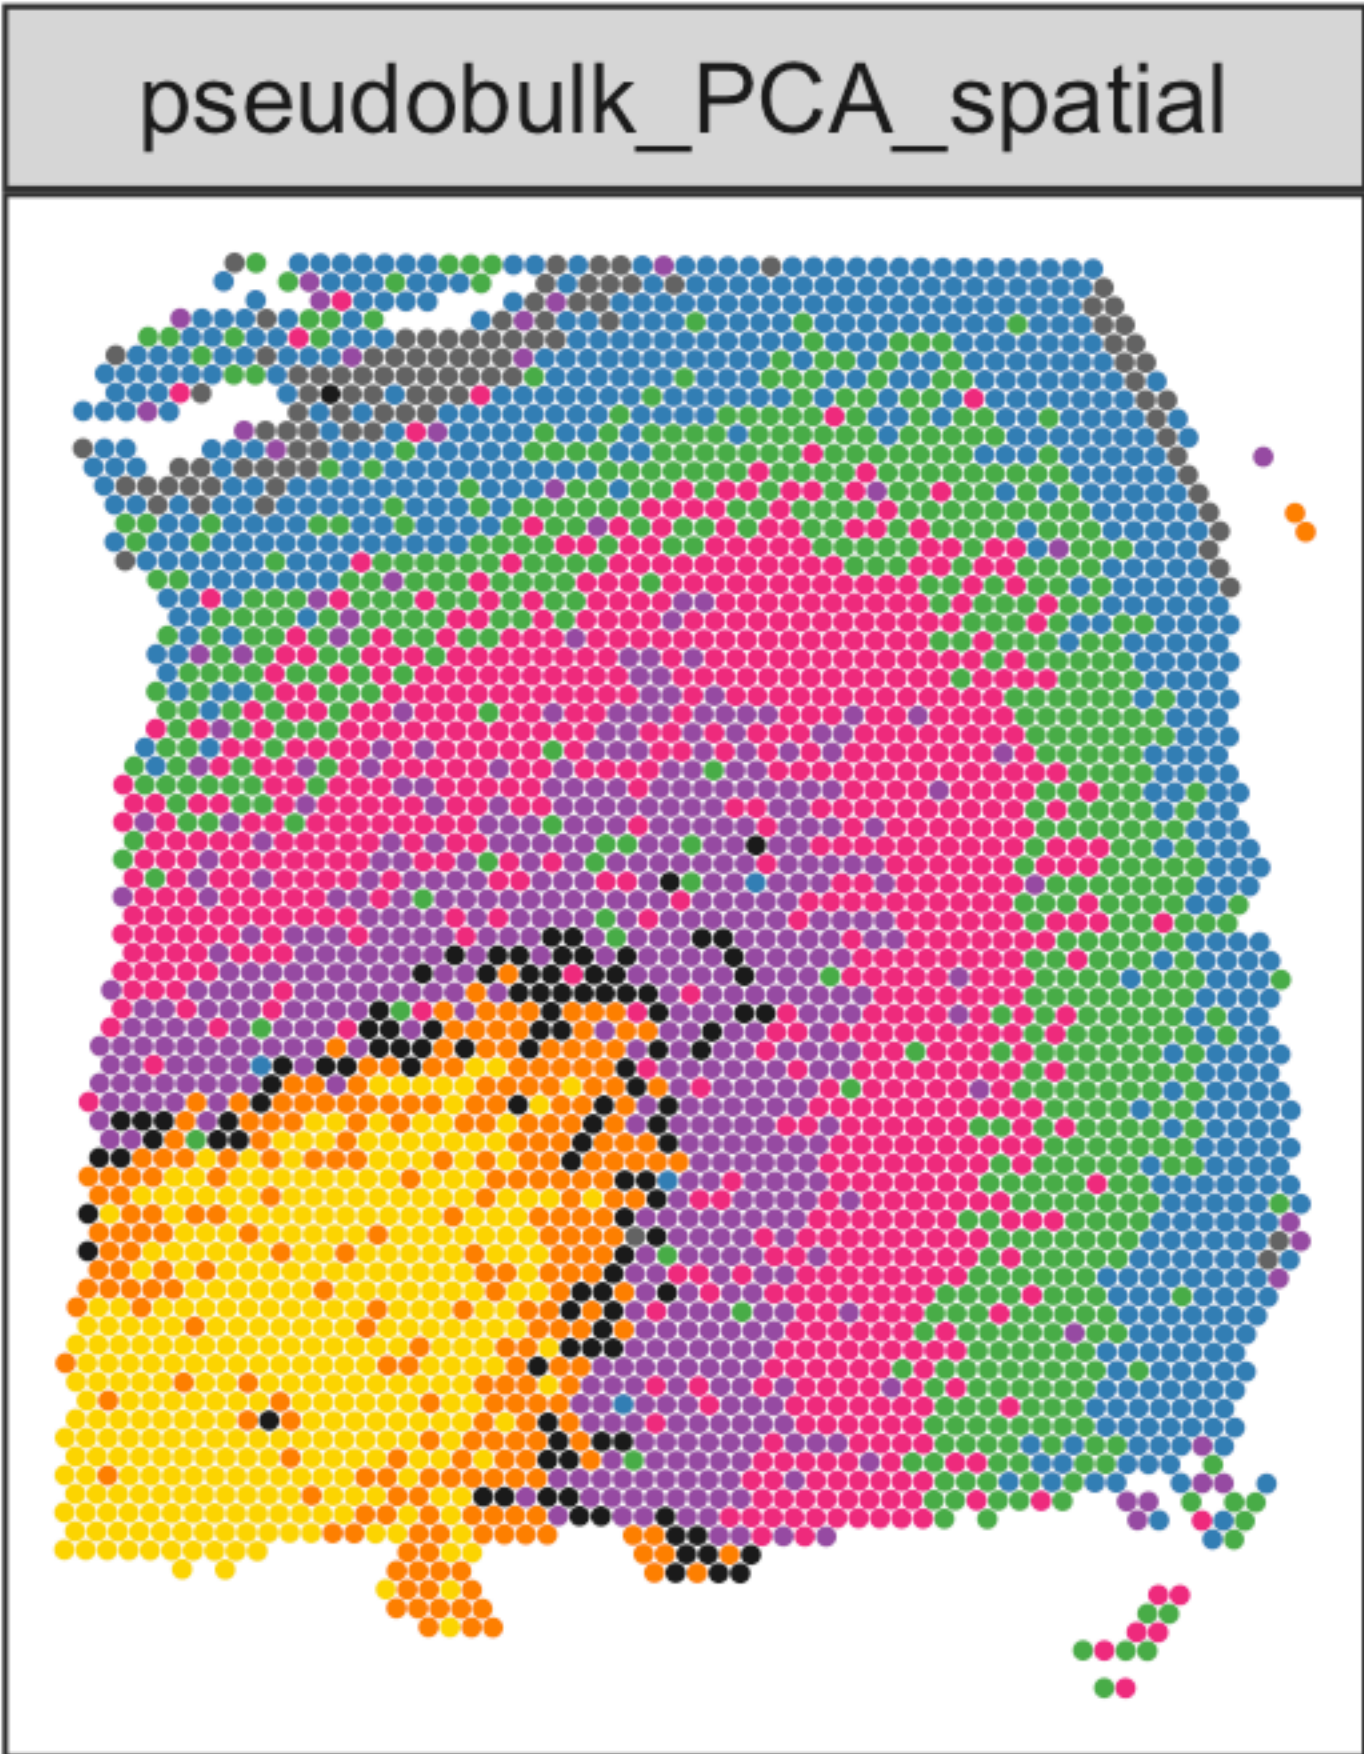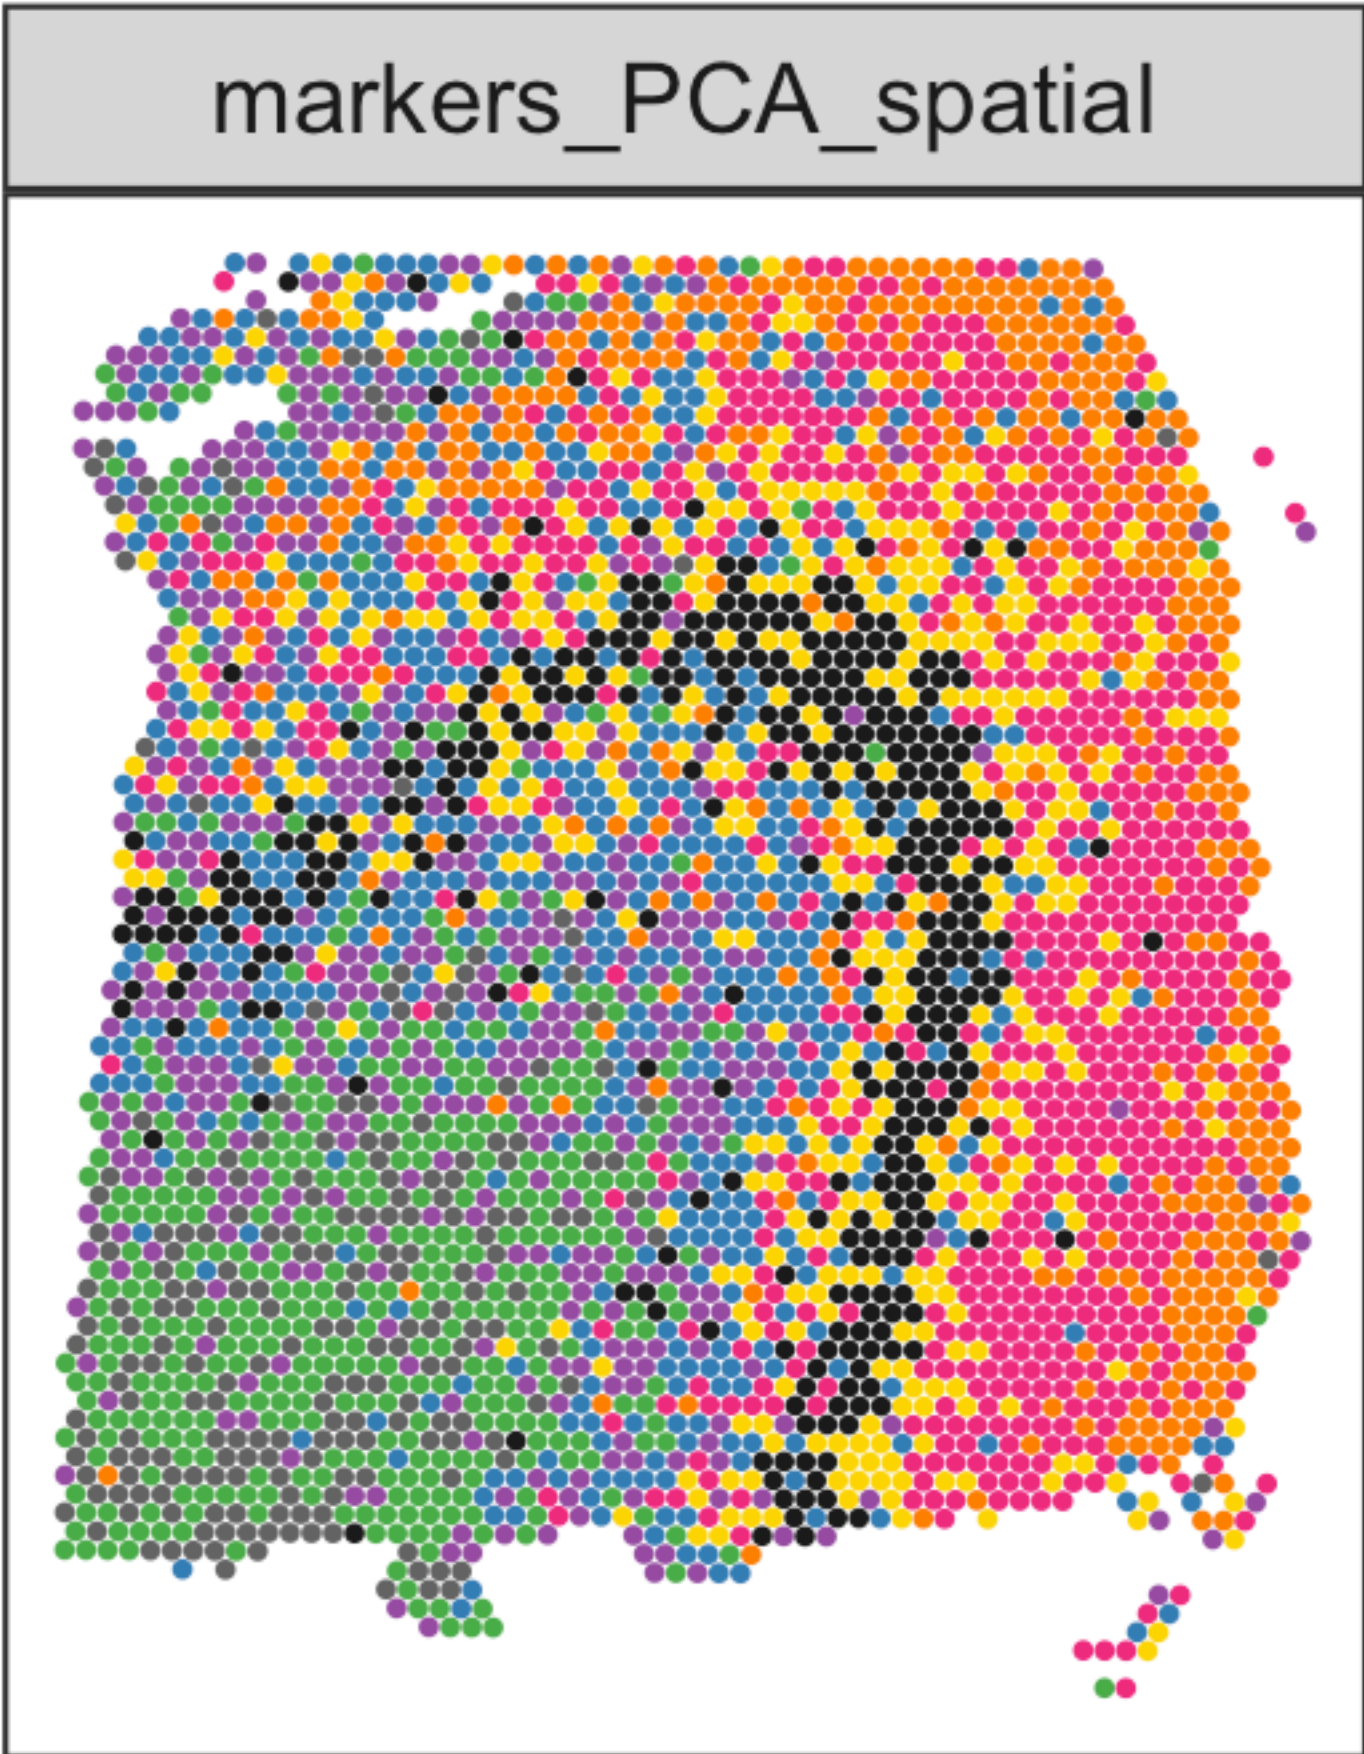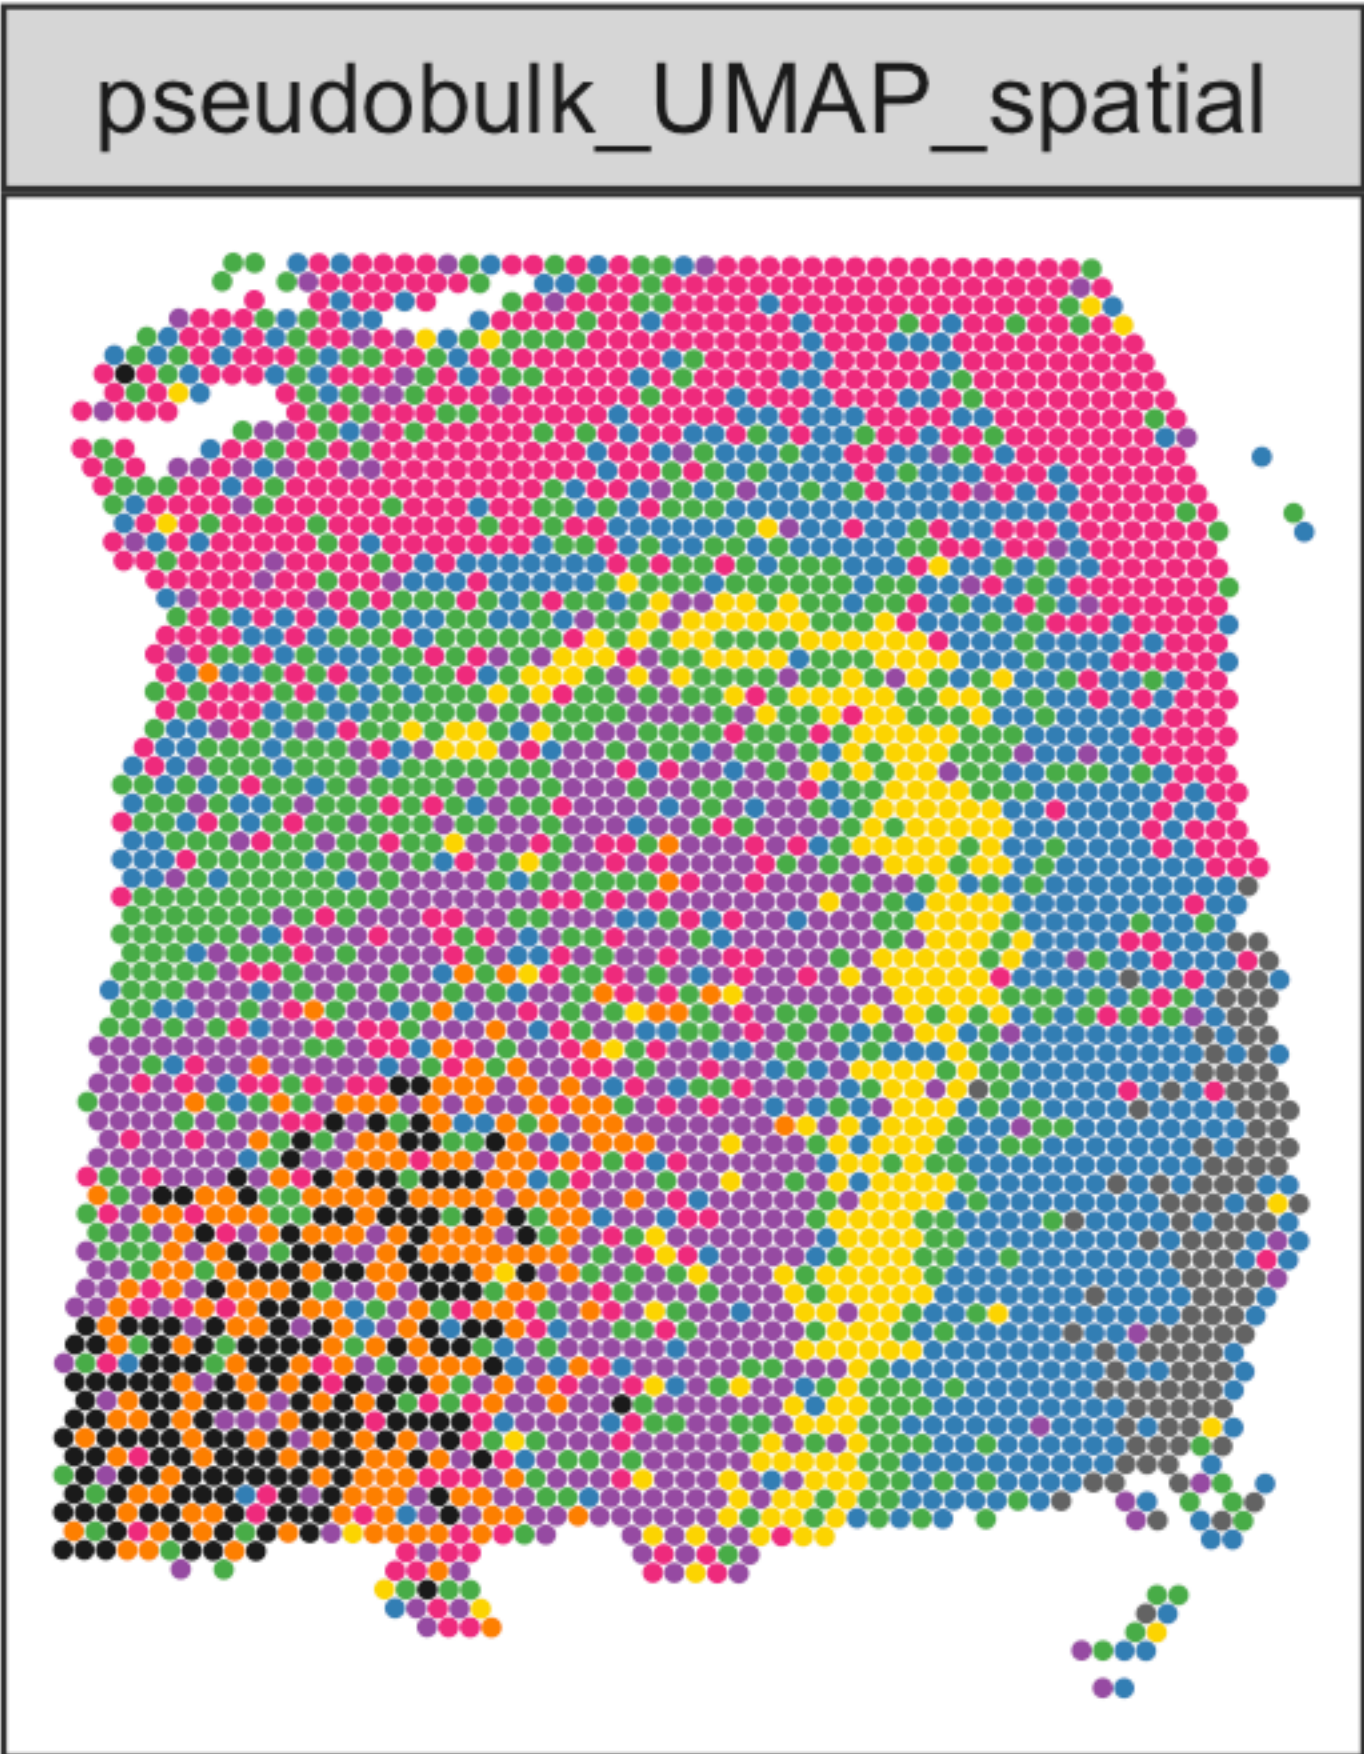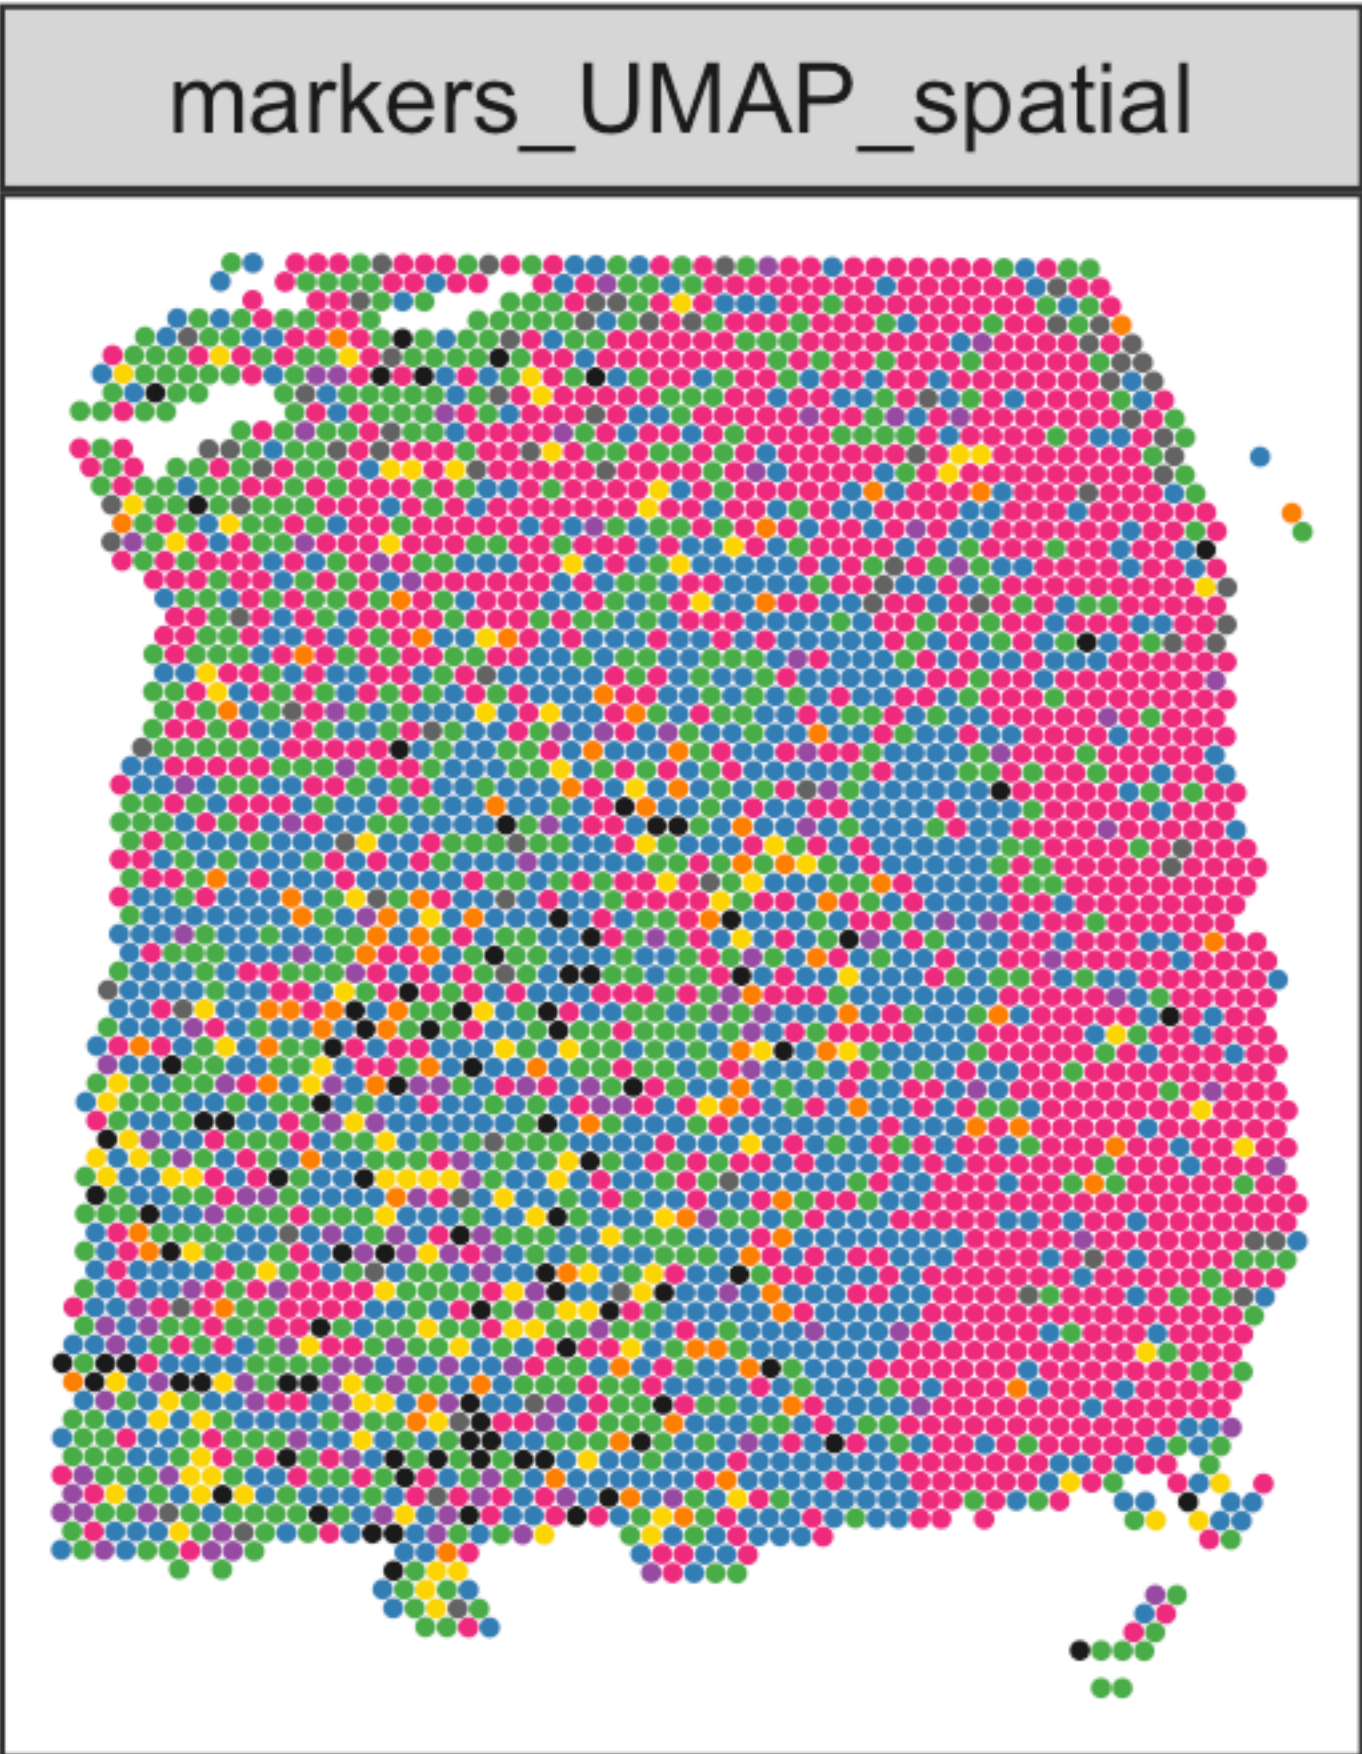



# Sample 151674: Clustering (unsupervised)

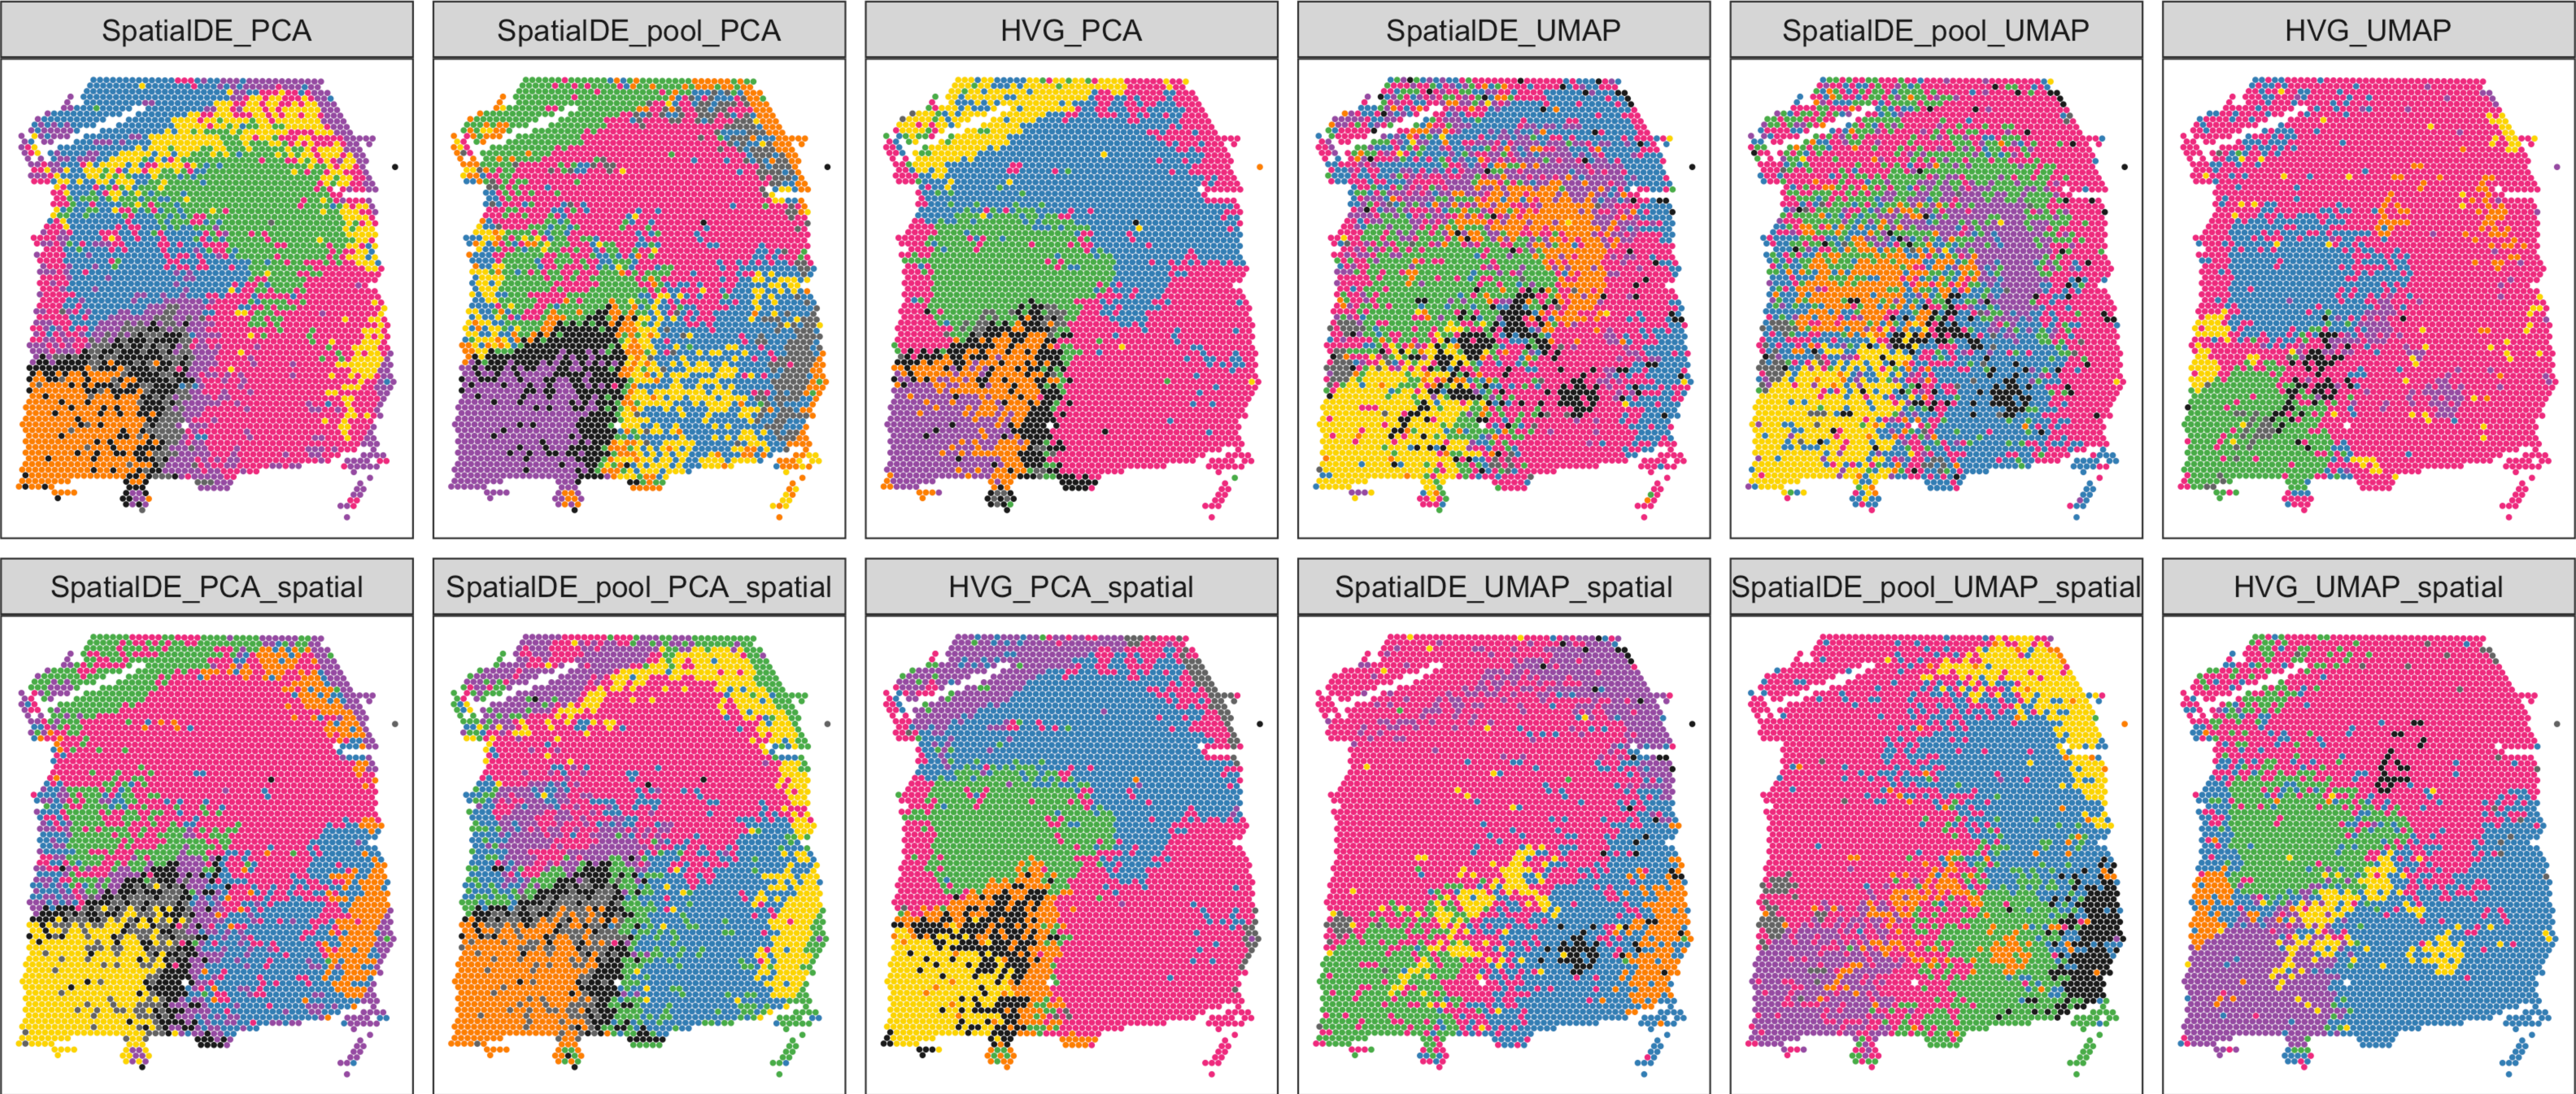



# Sample 151674: Clustering (semi-supervised and markers)

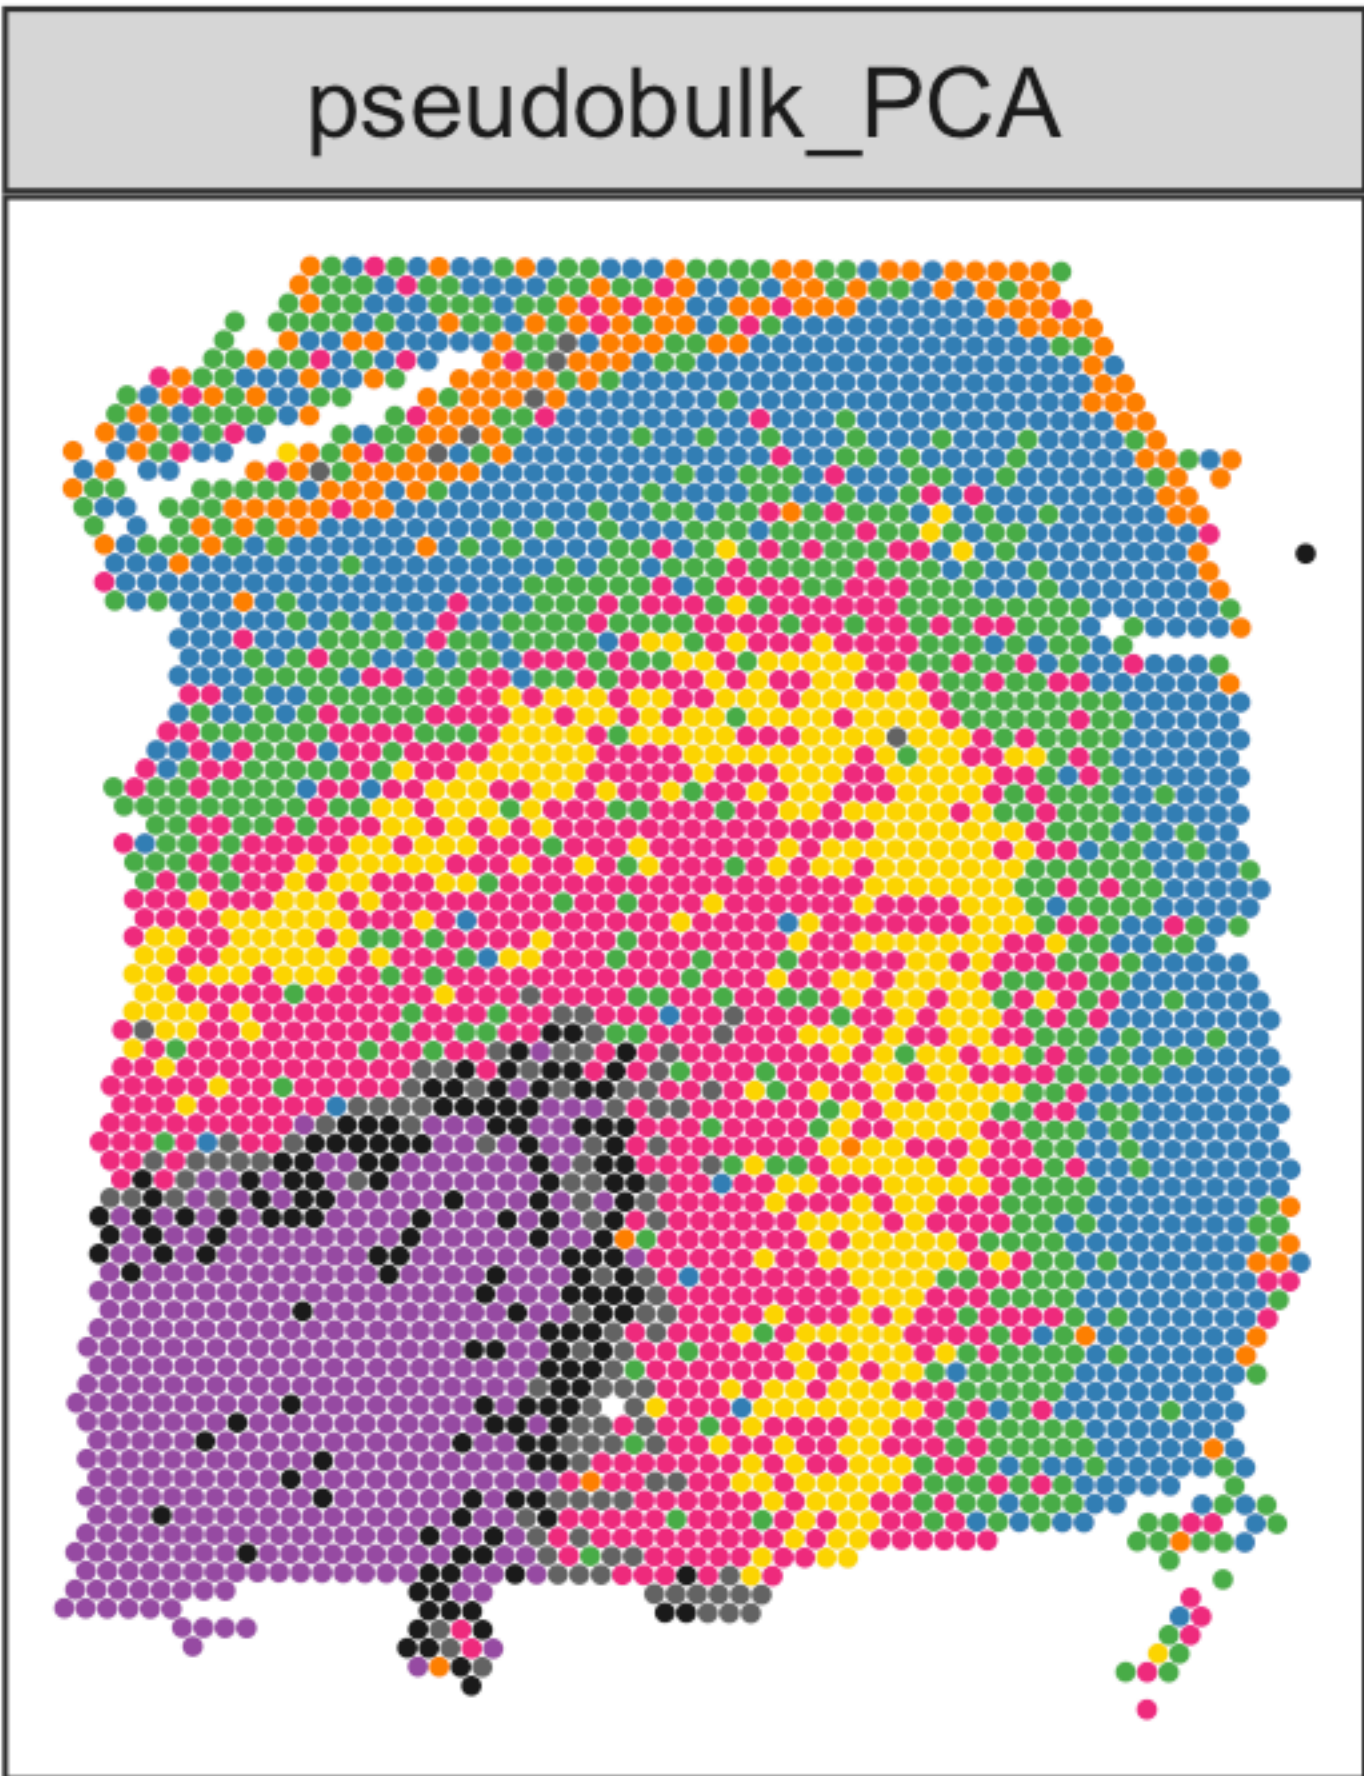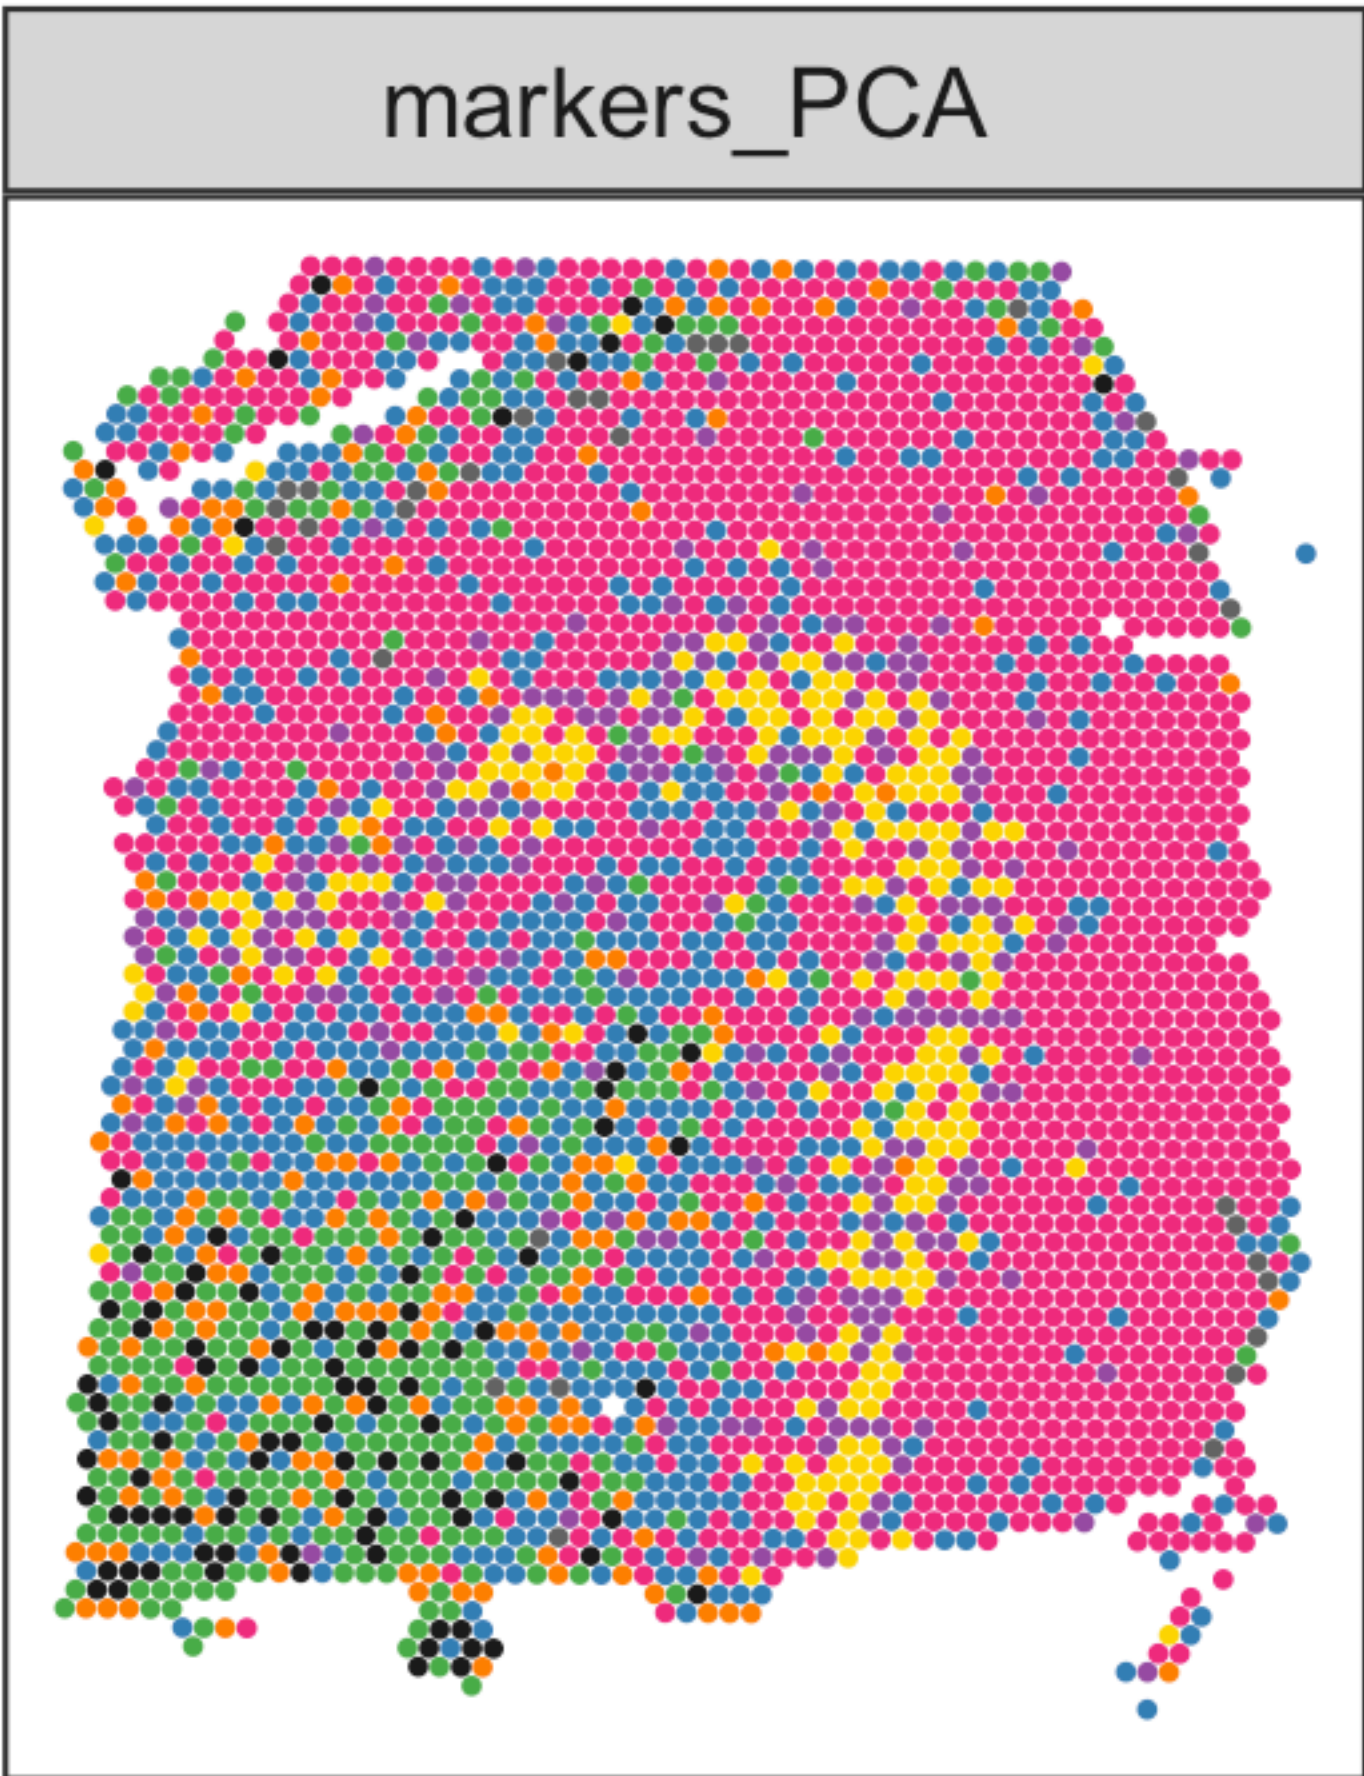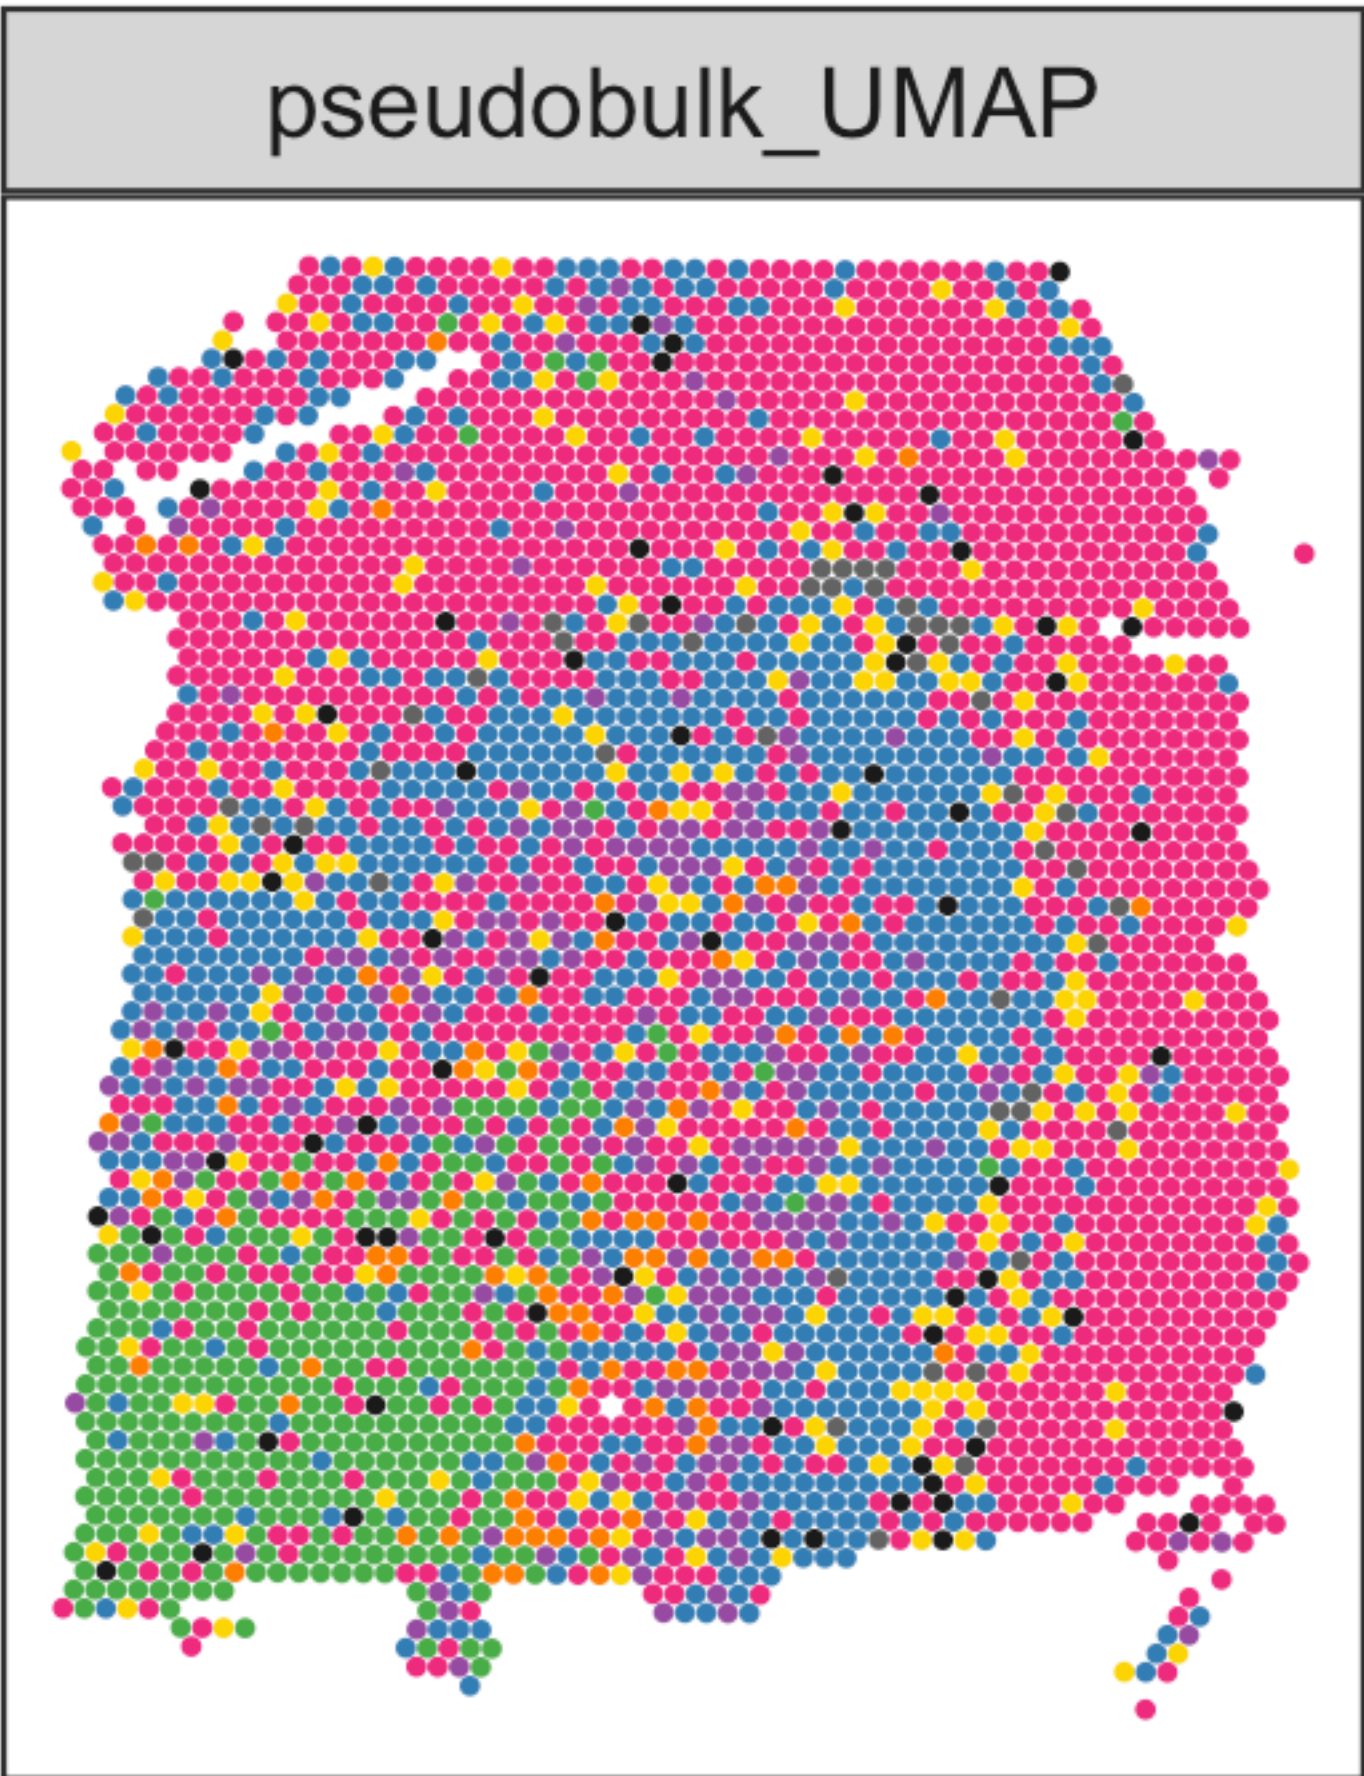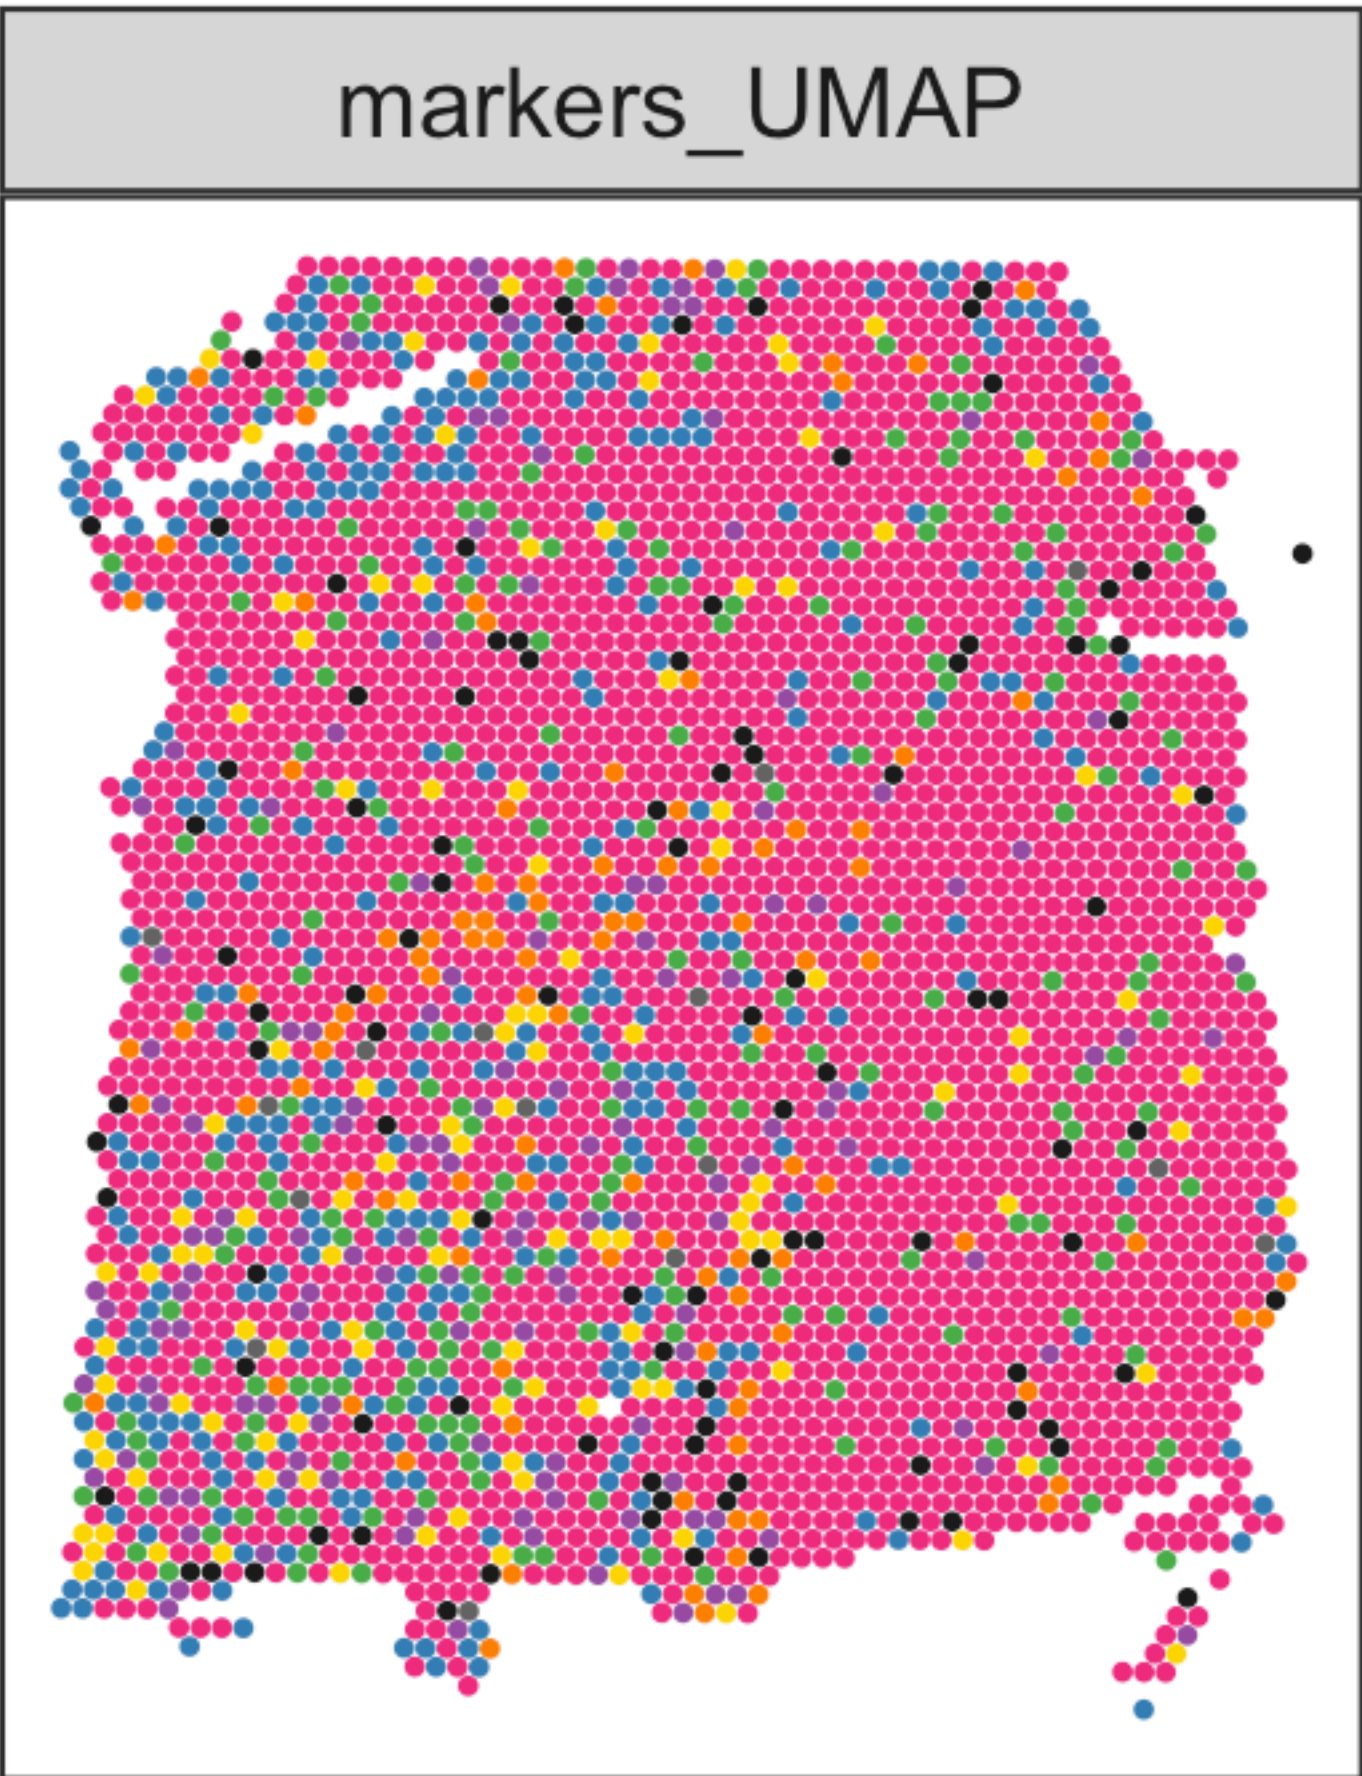

cluster

- 1 (pink)
- 2 (blue)
- 3 (green)
- 4 (purple)
- 5 (yellow)
- 6 (orange)
- 7 (black)
- 8 (grey)

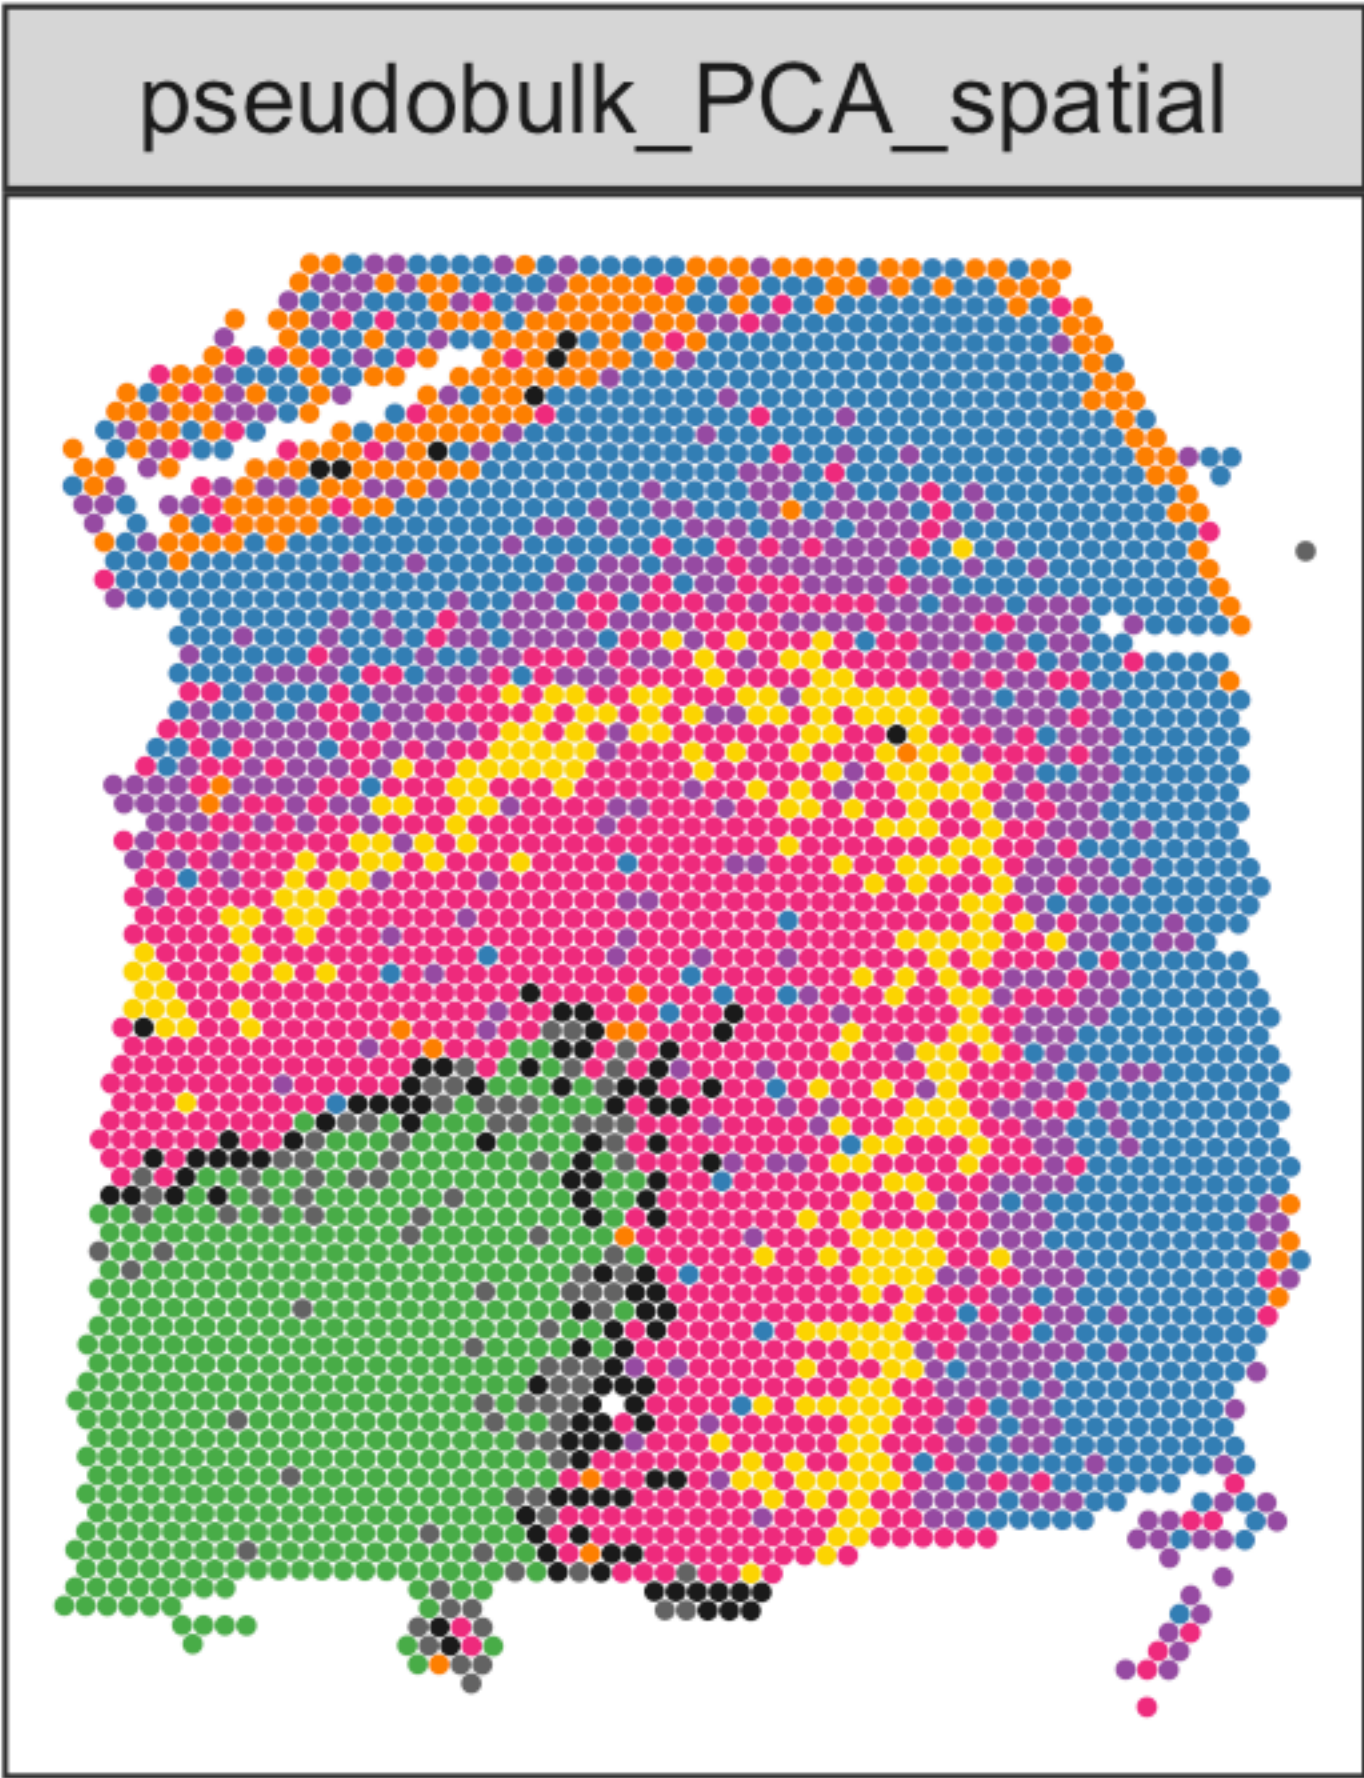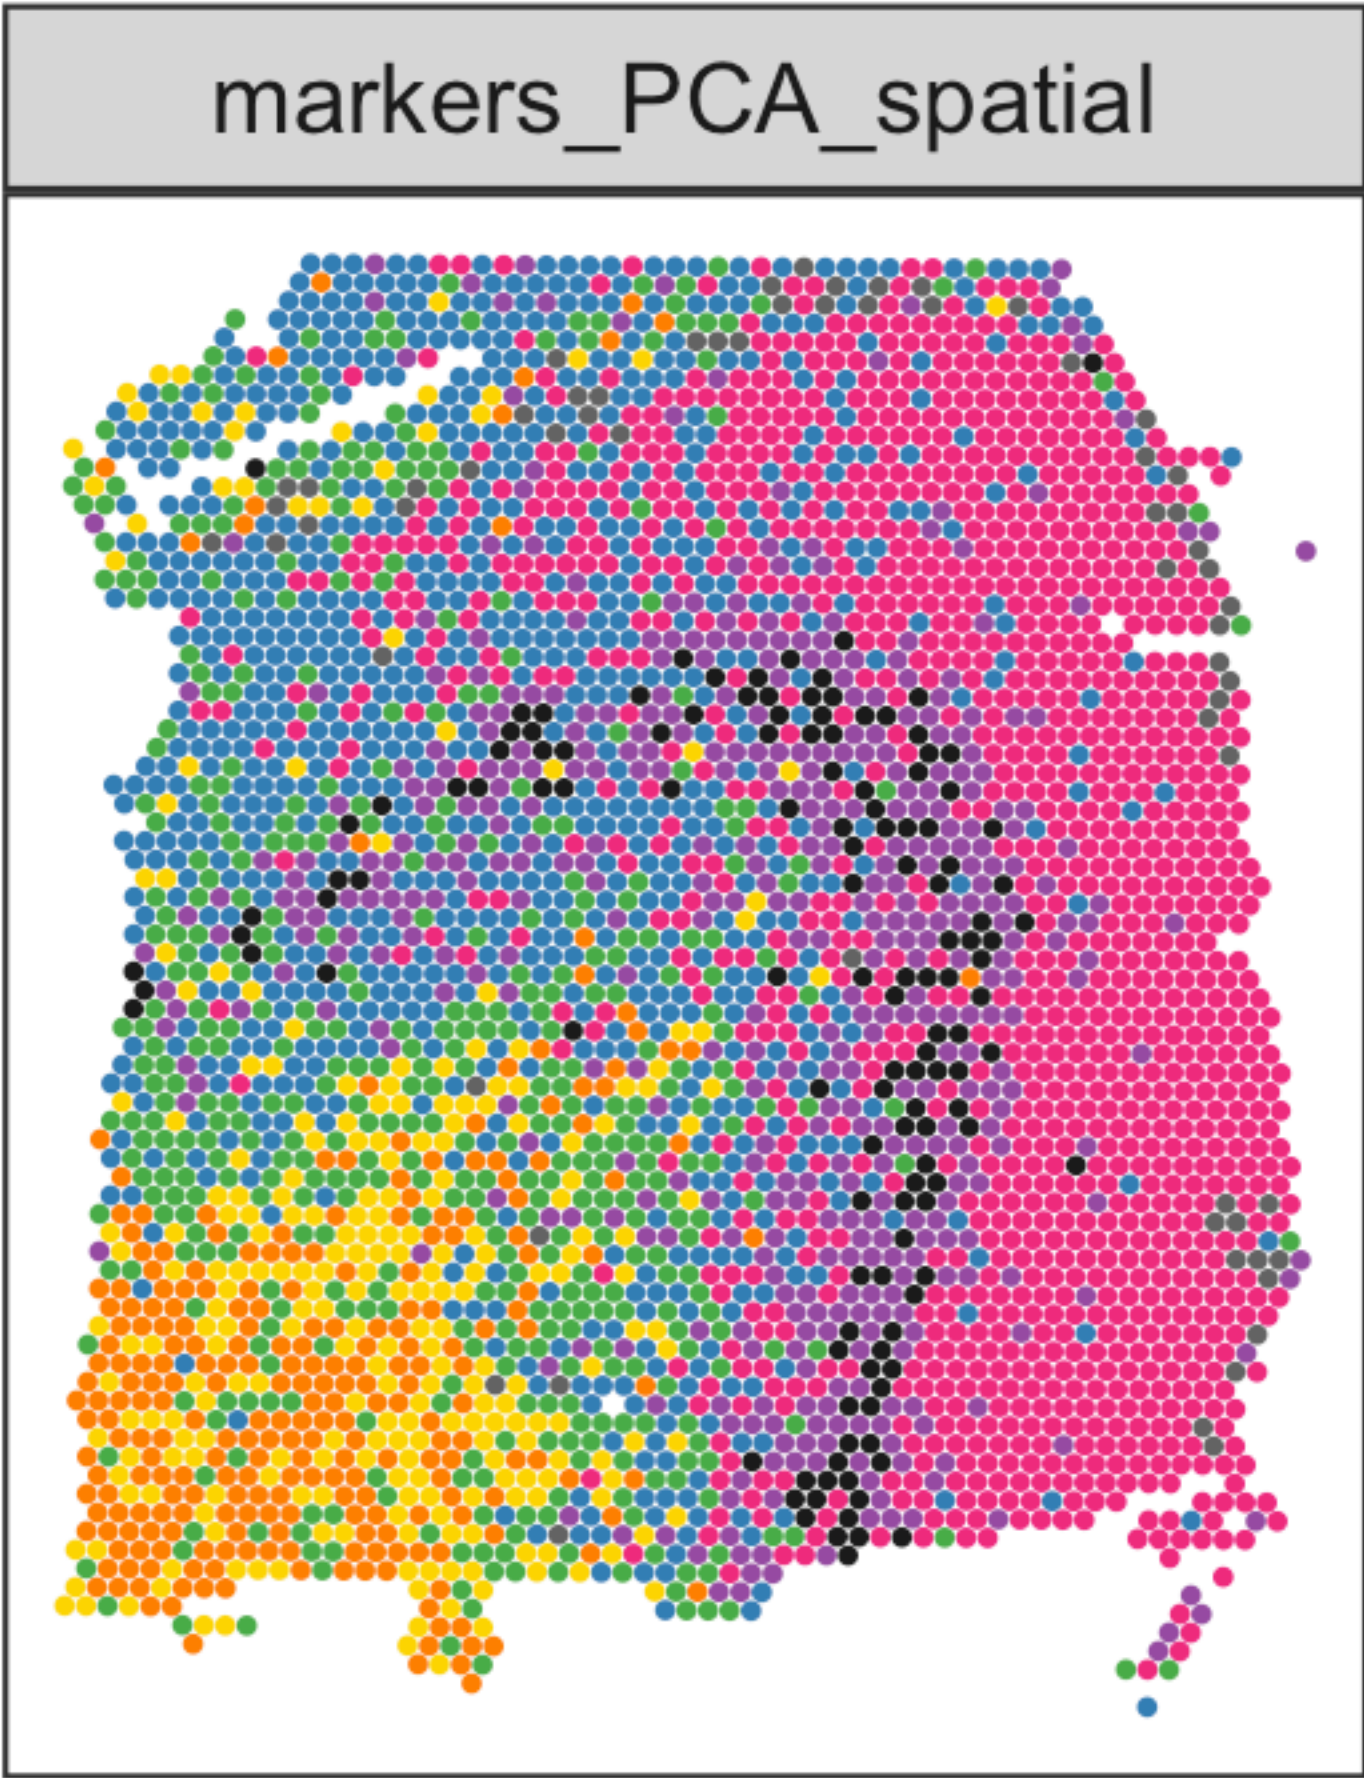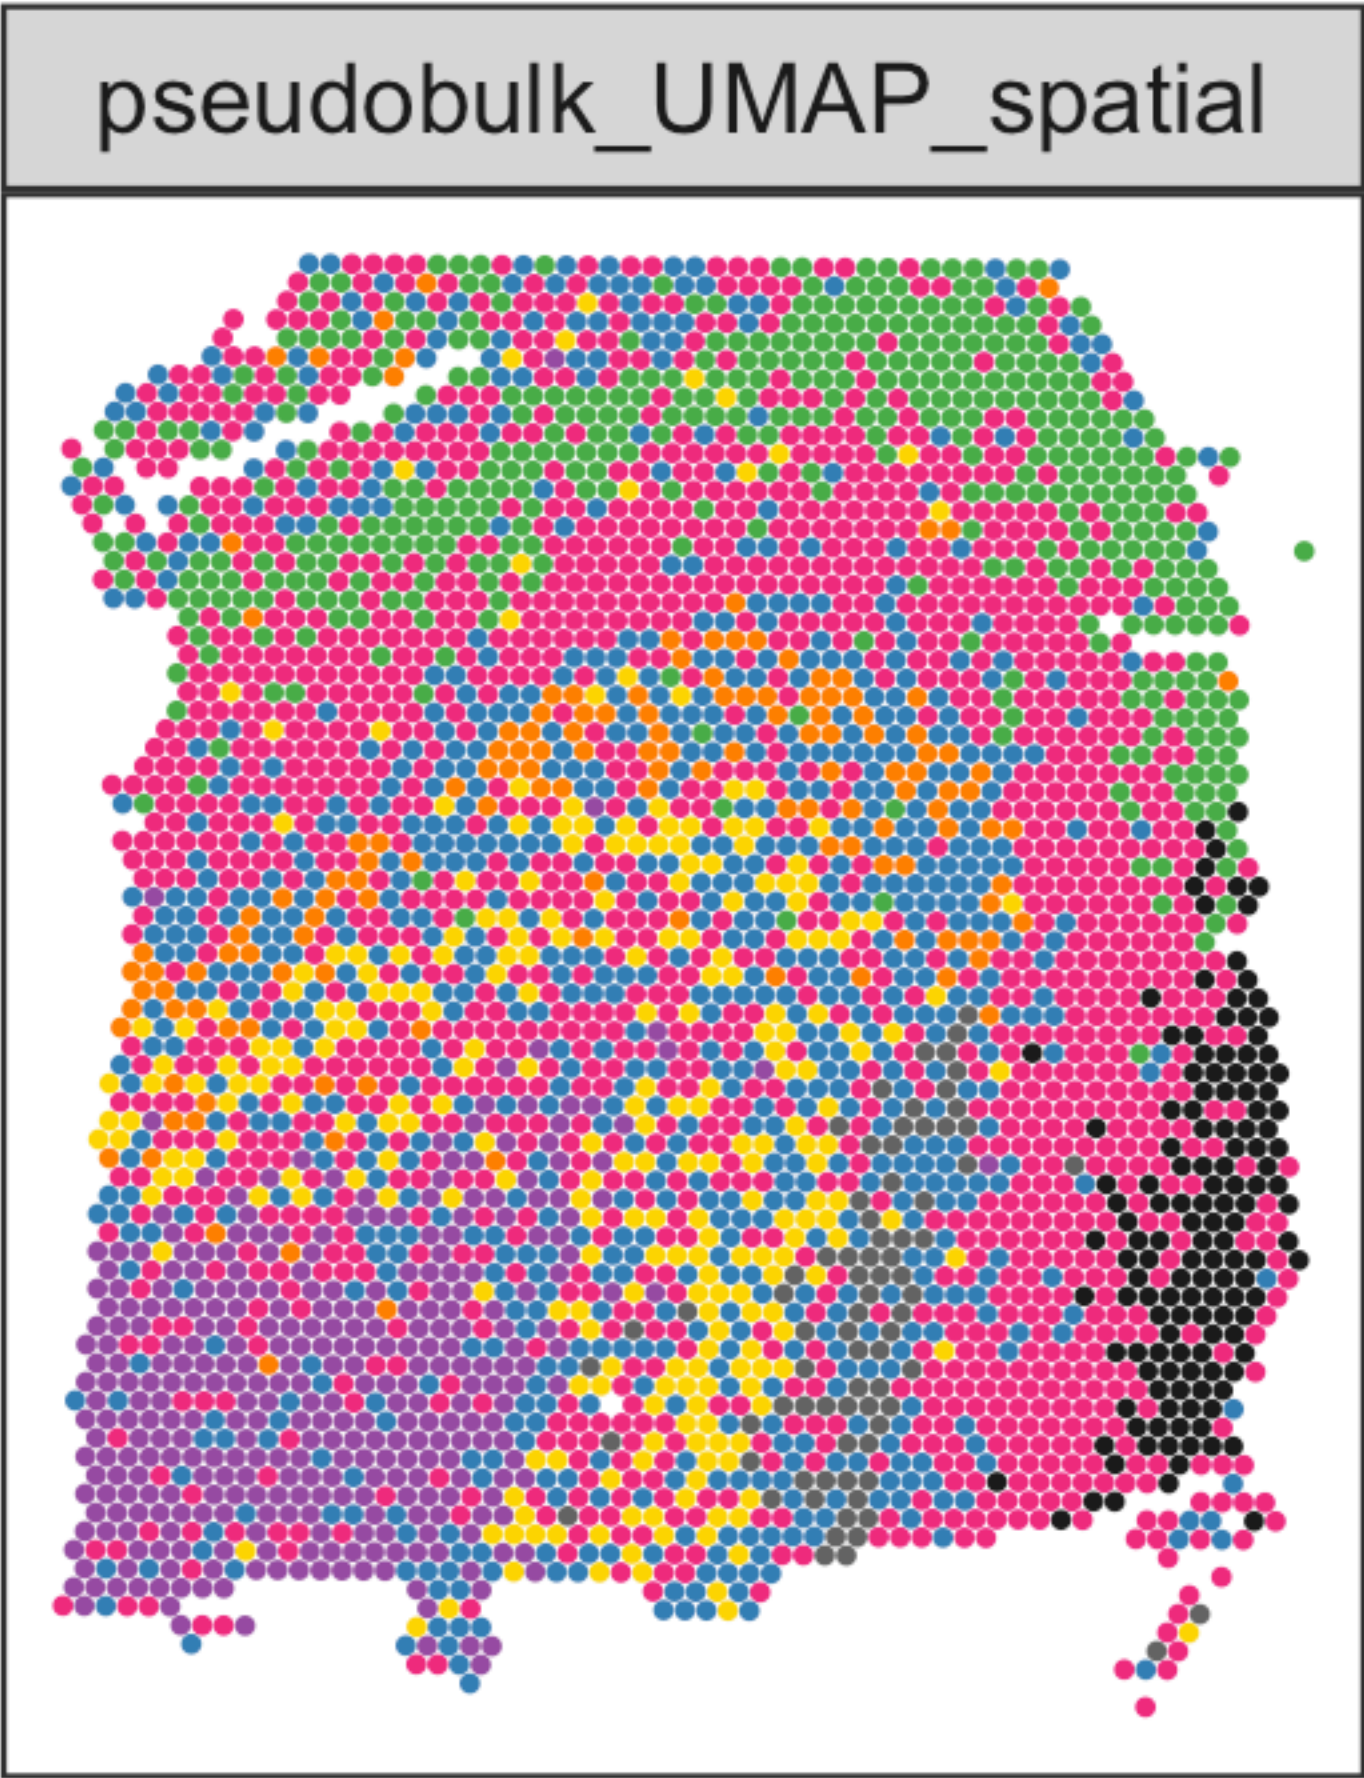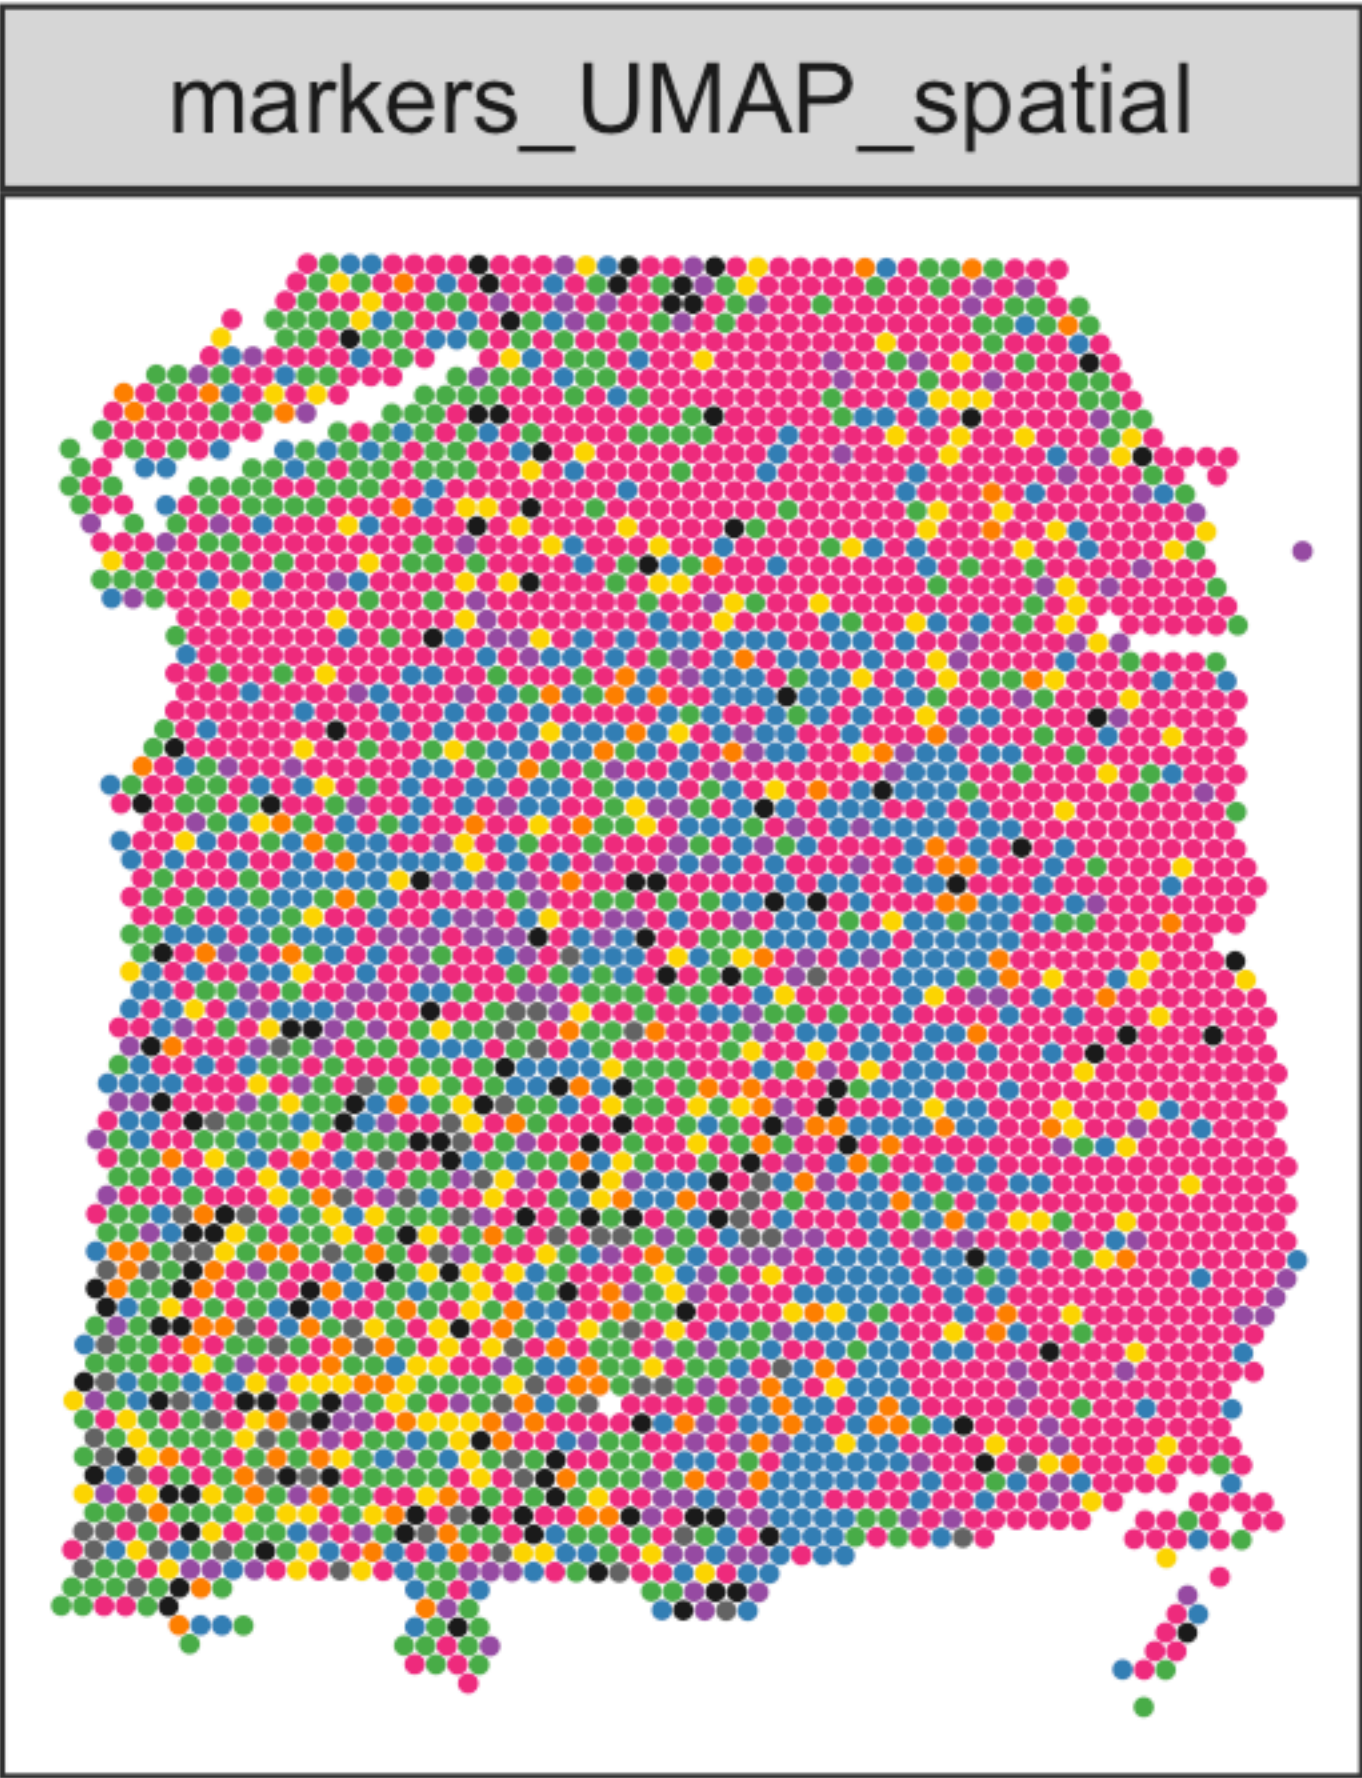



# Sample 151675: Clustering (unsupervised)

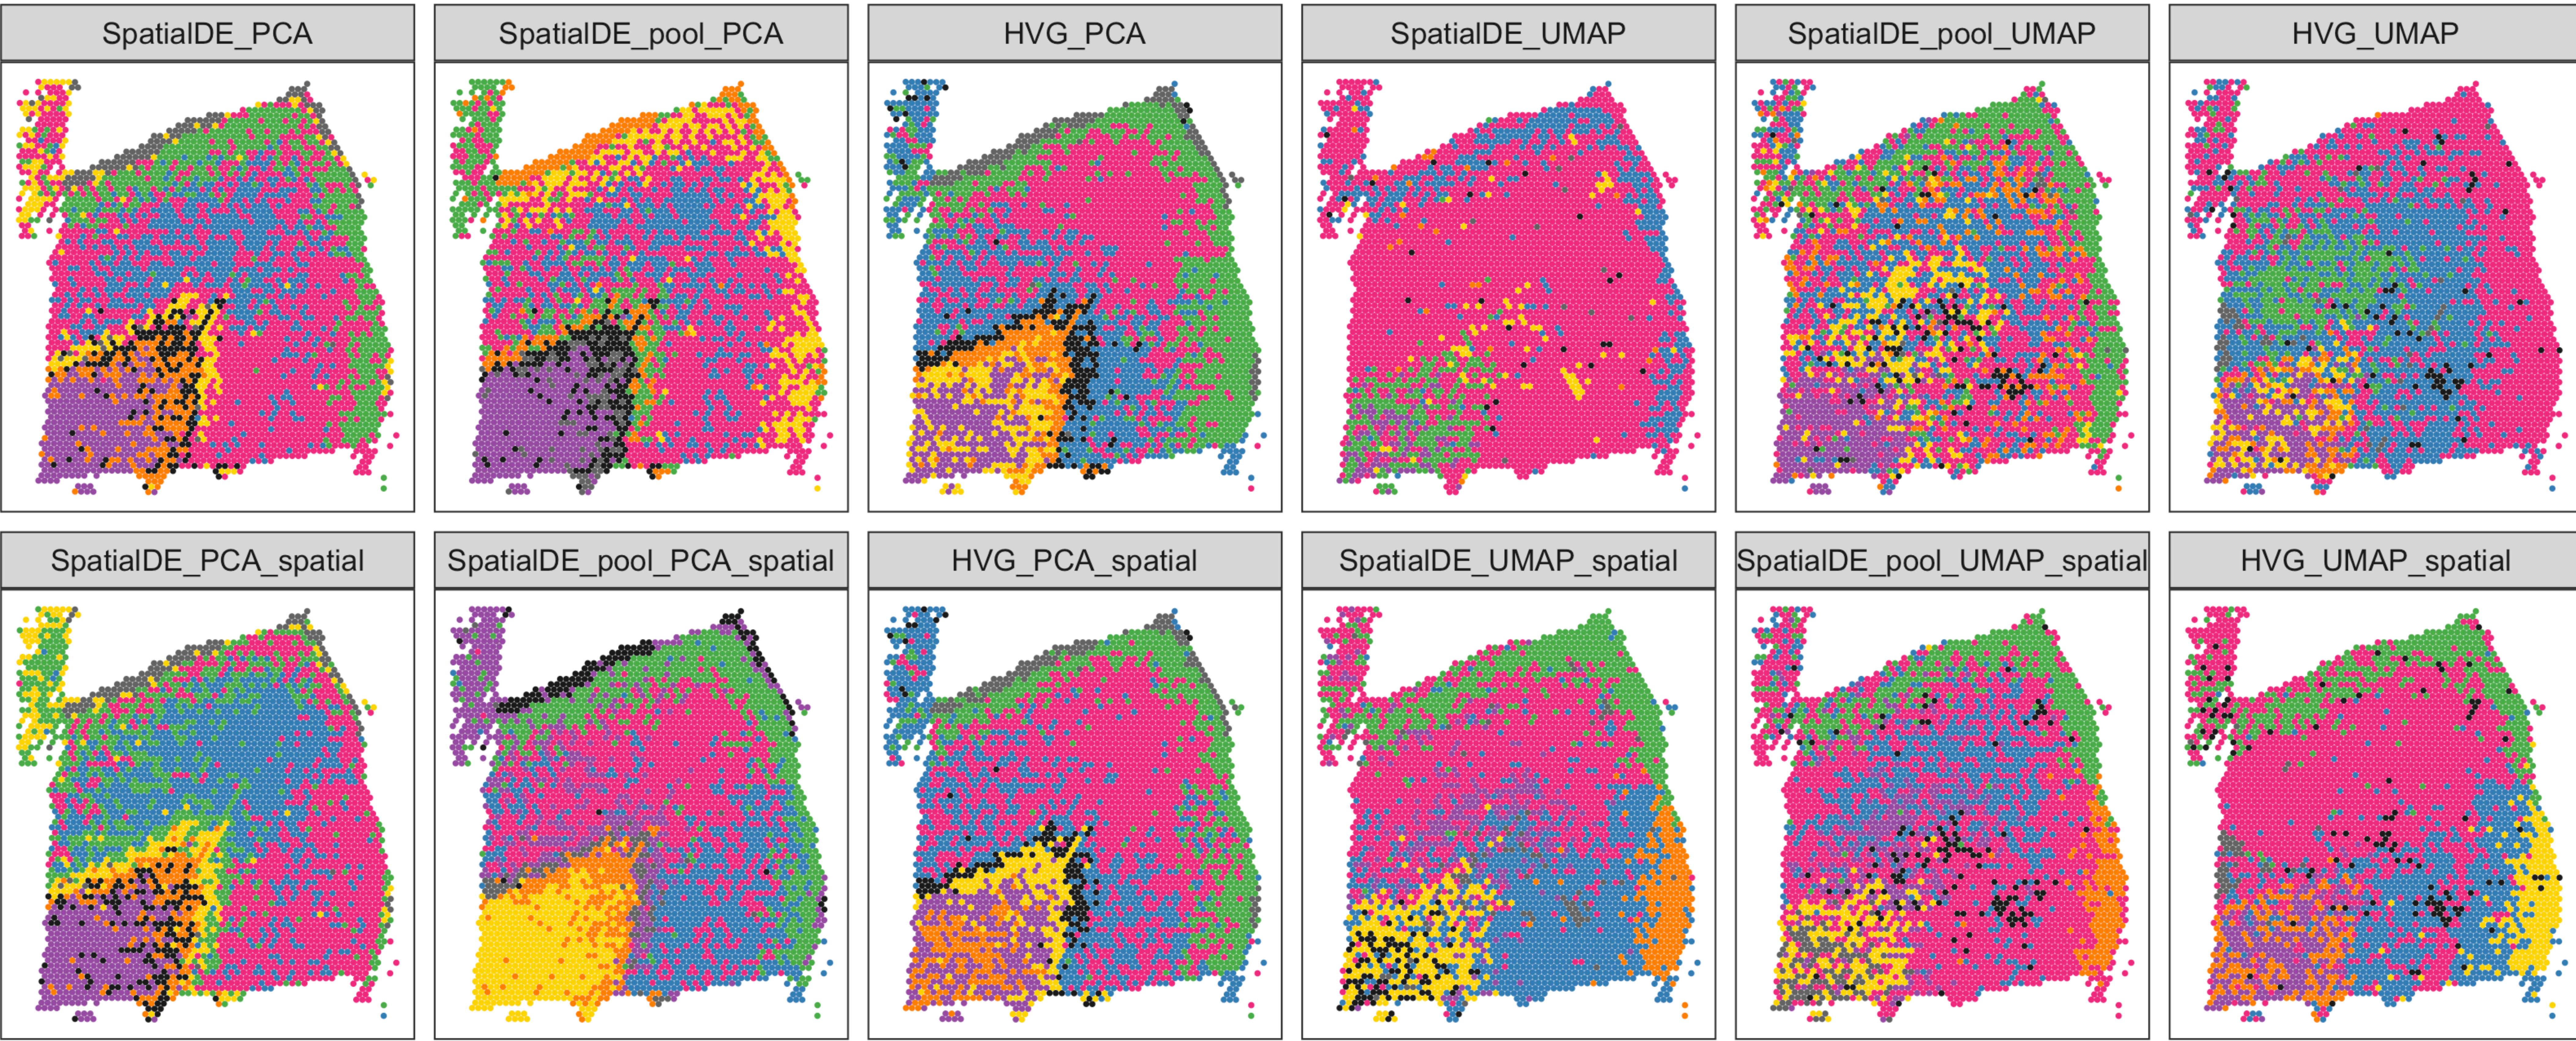



# Sample 151675: Clustering (semi-supervised and markers)

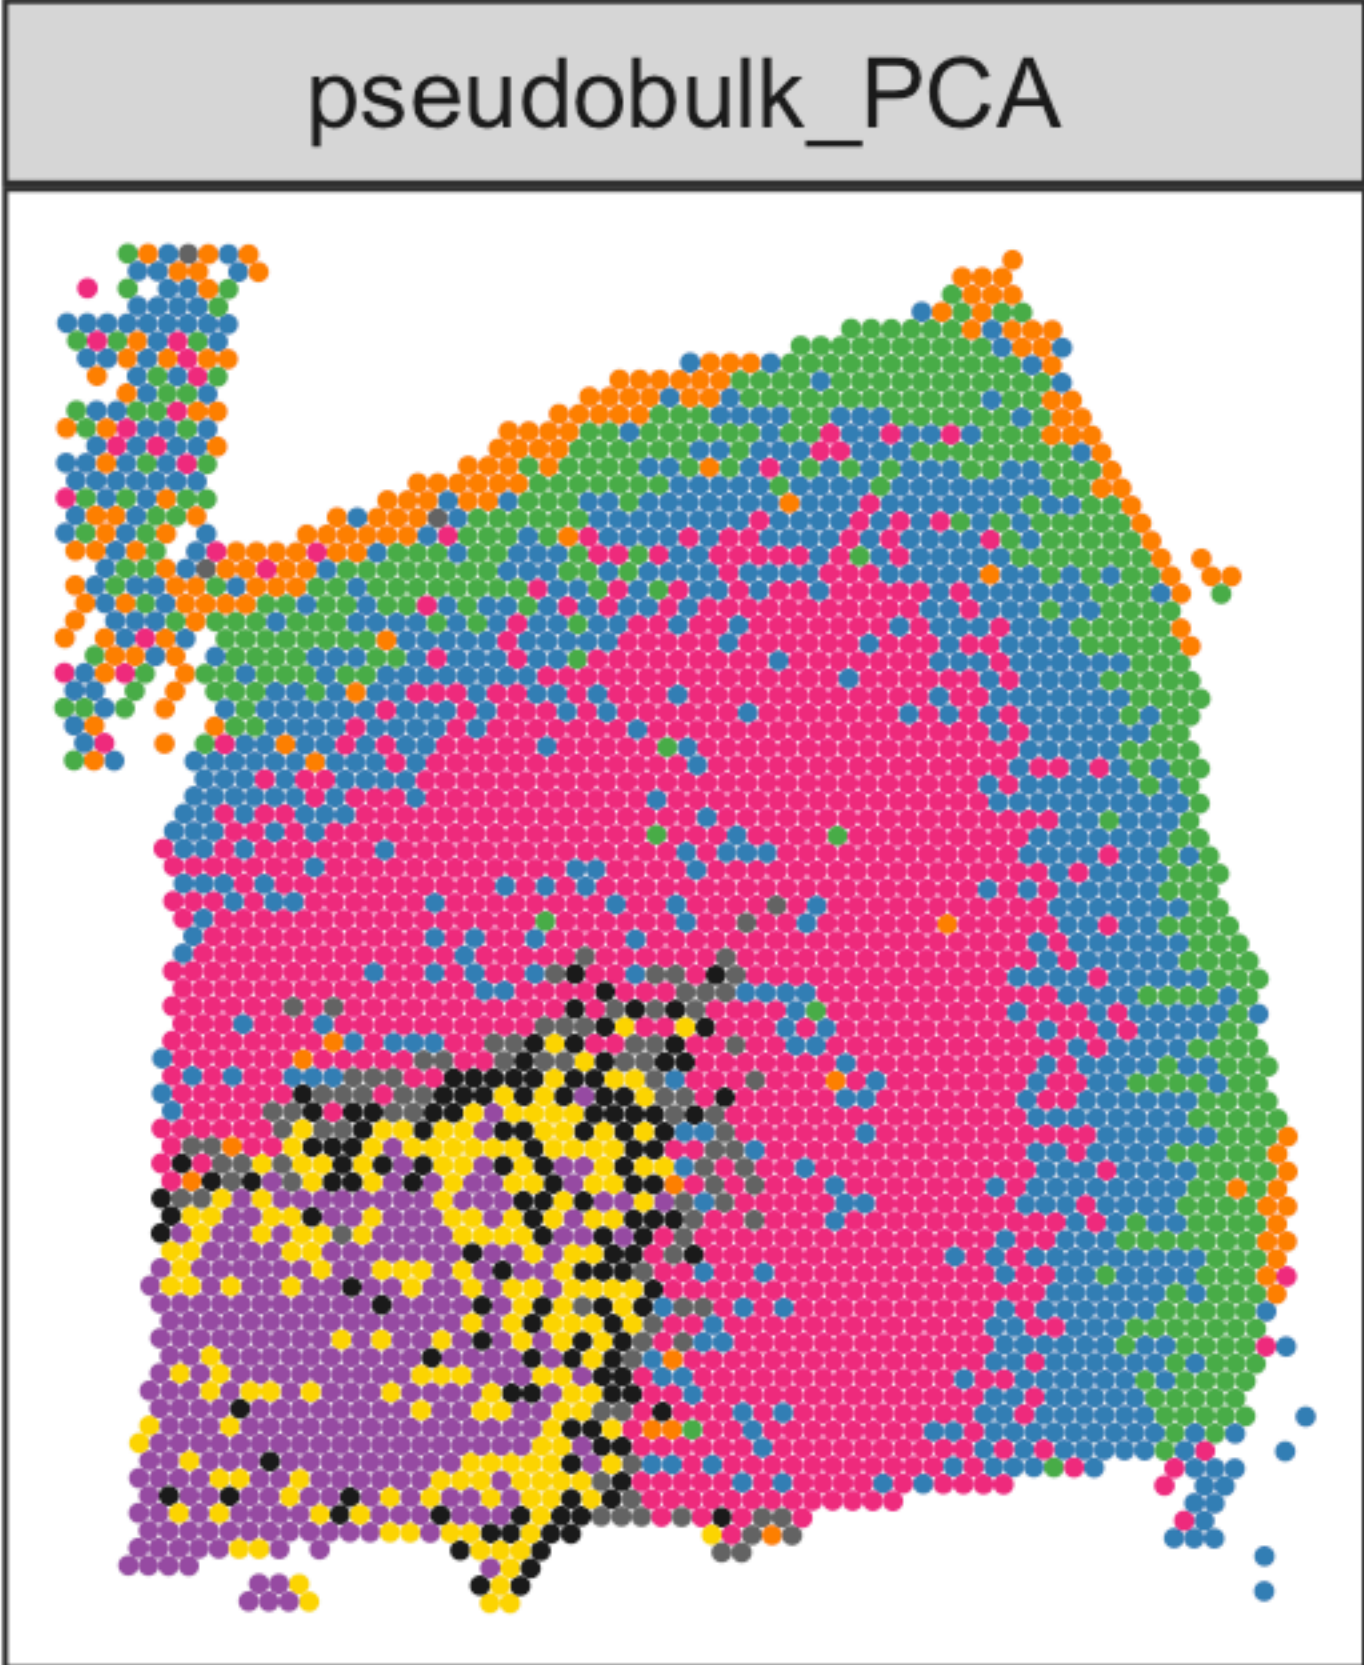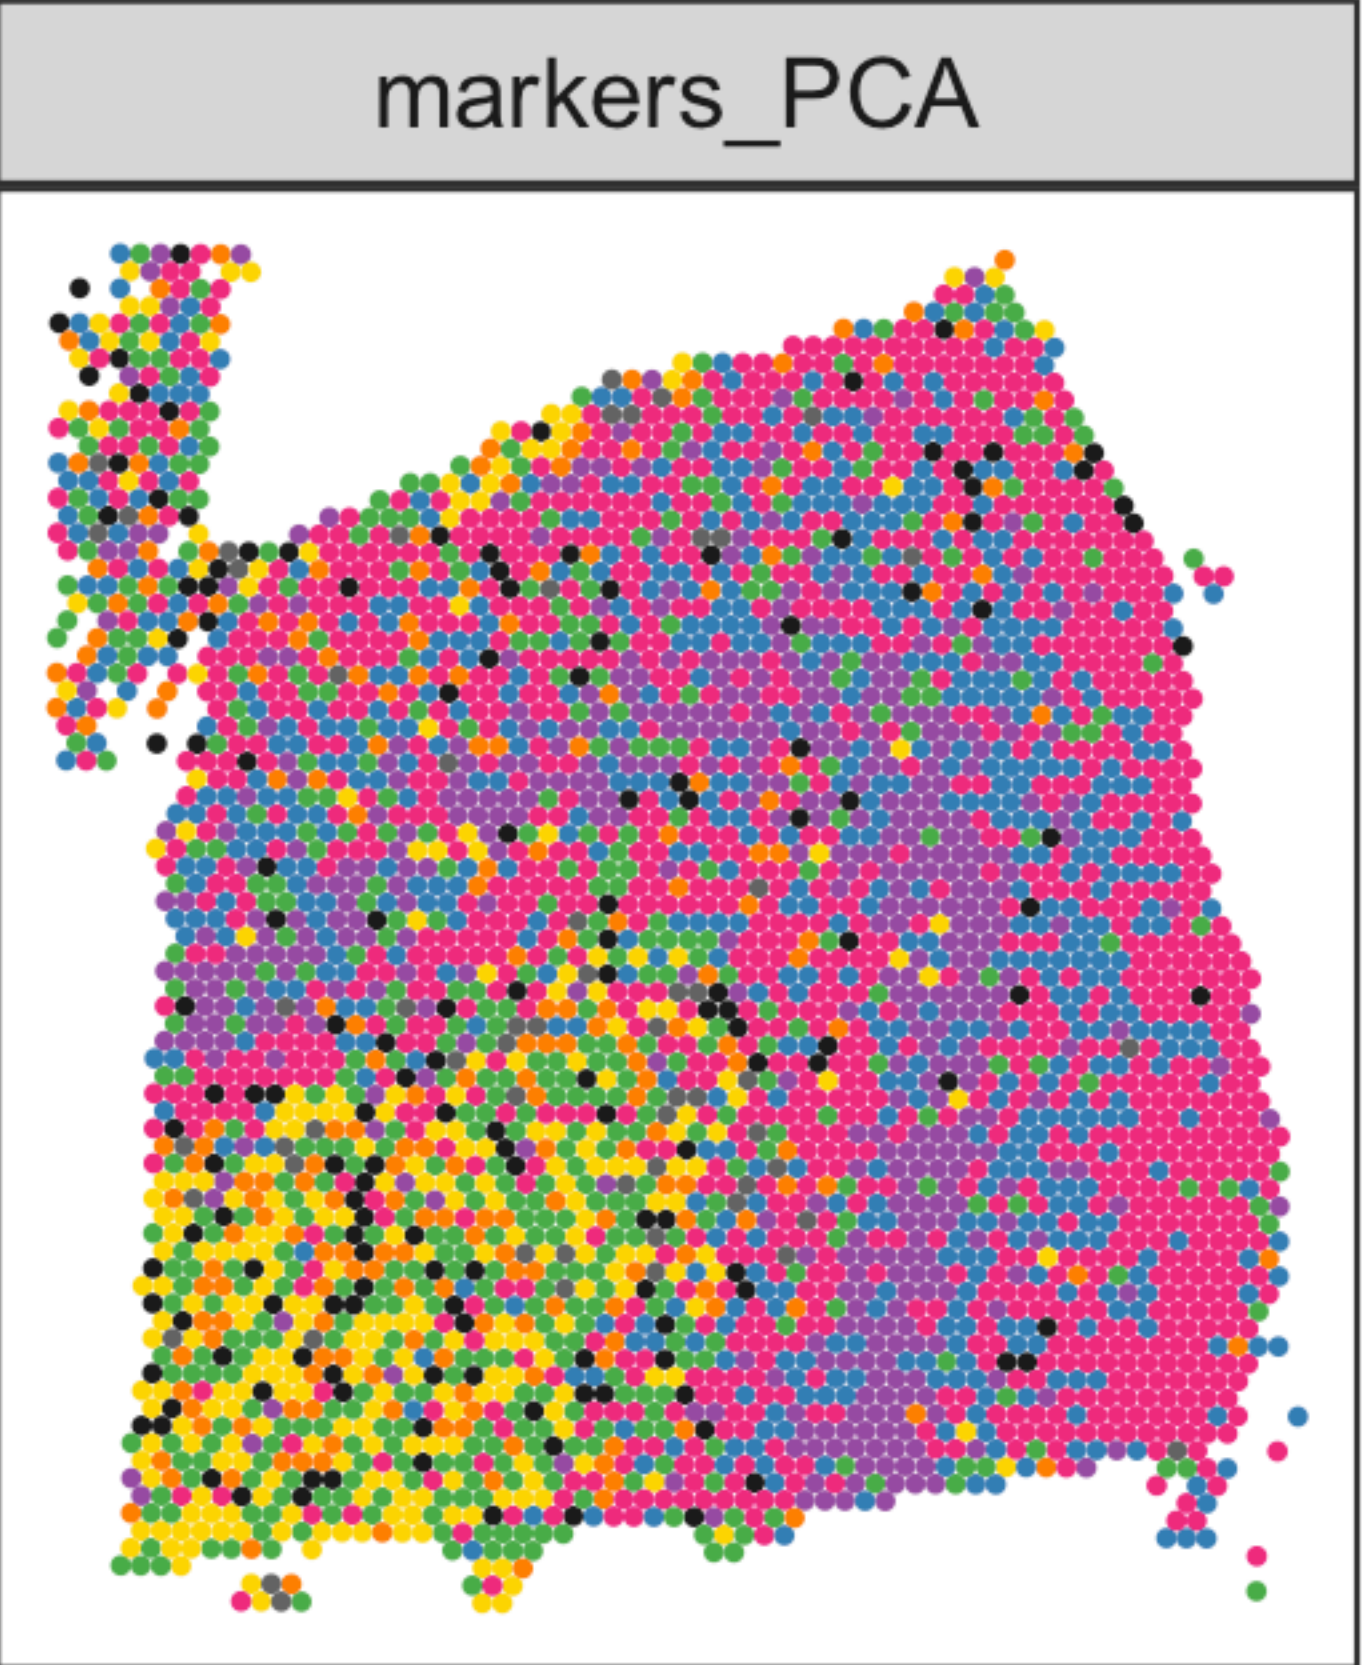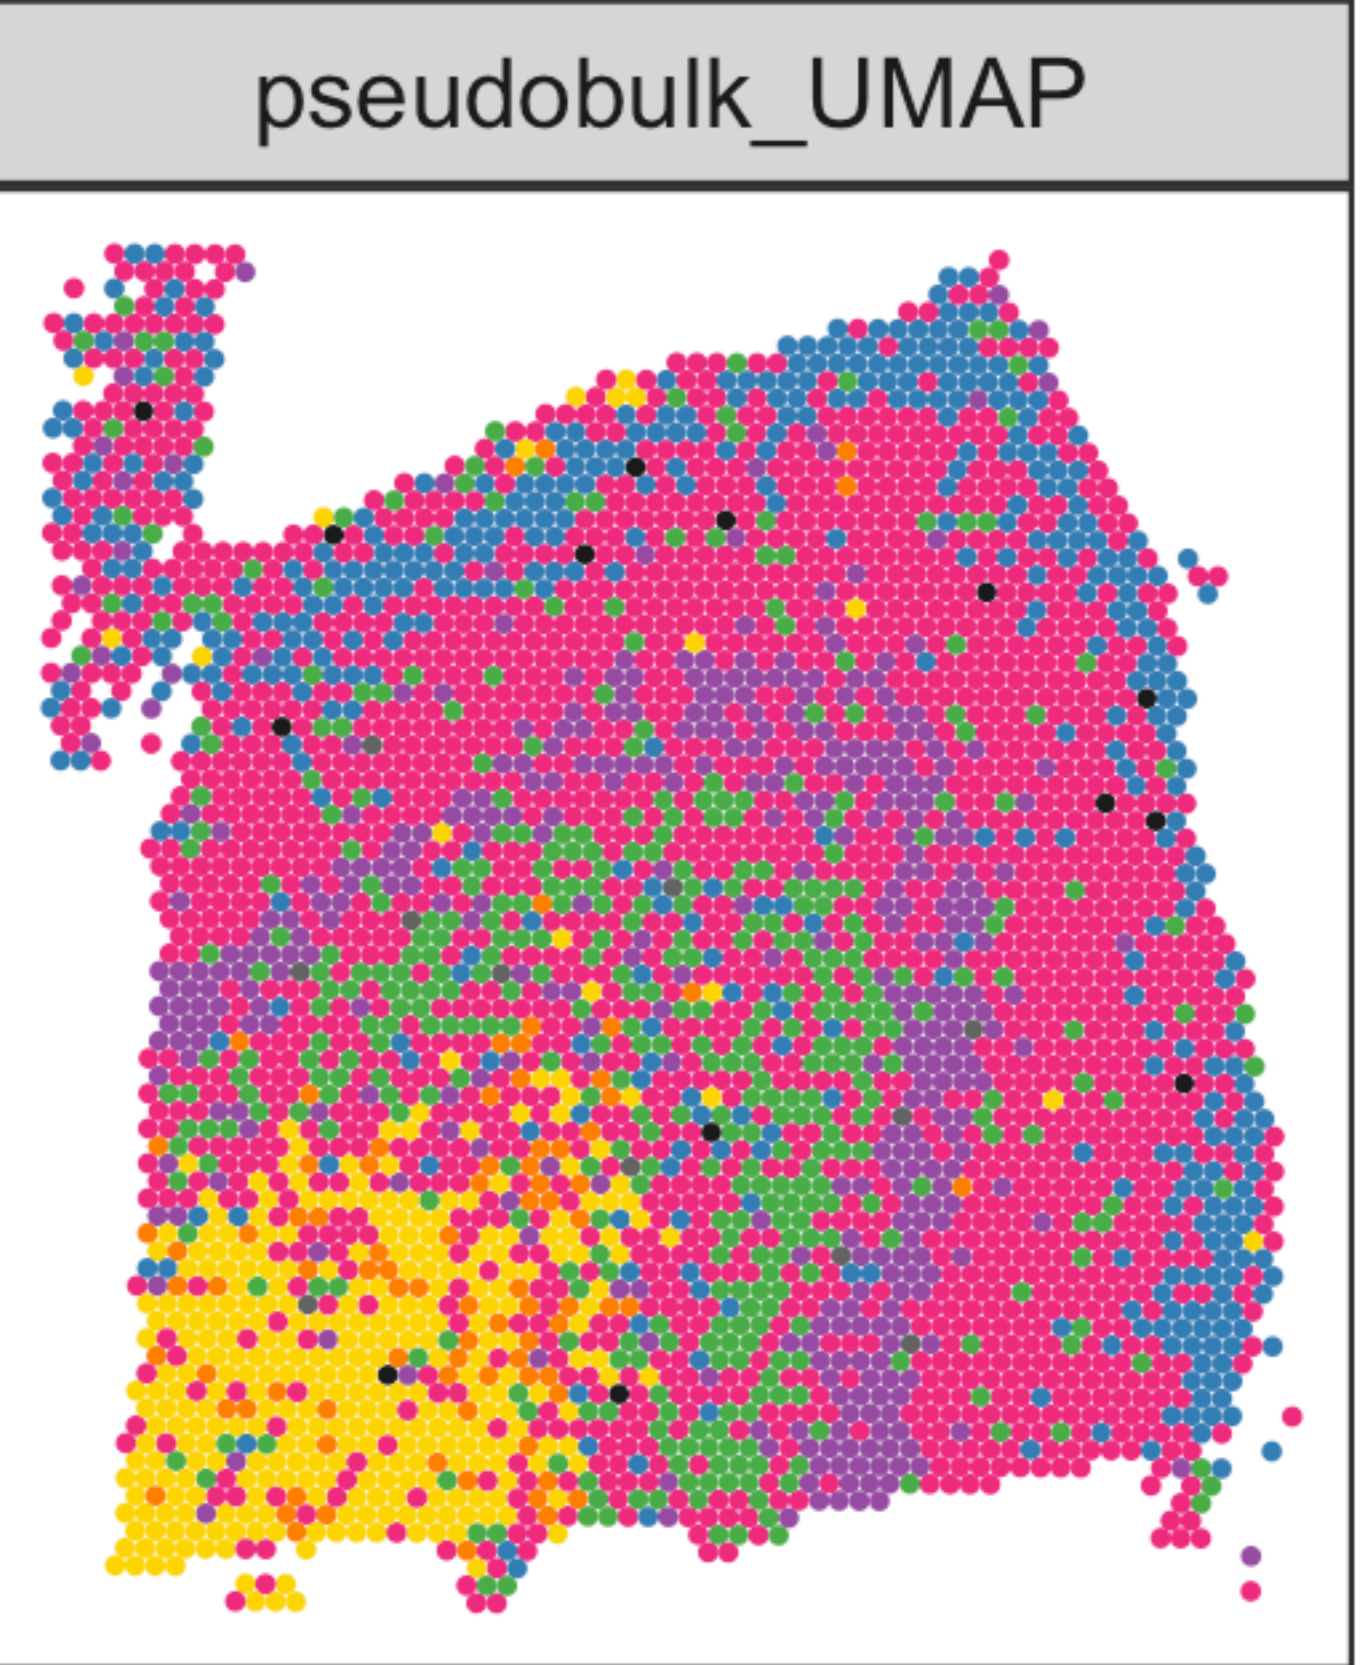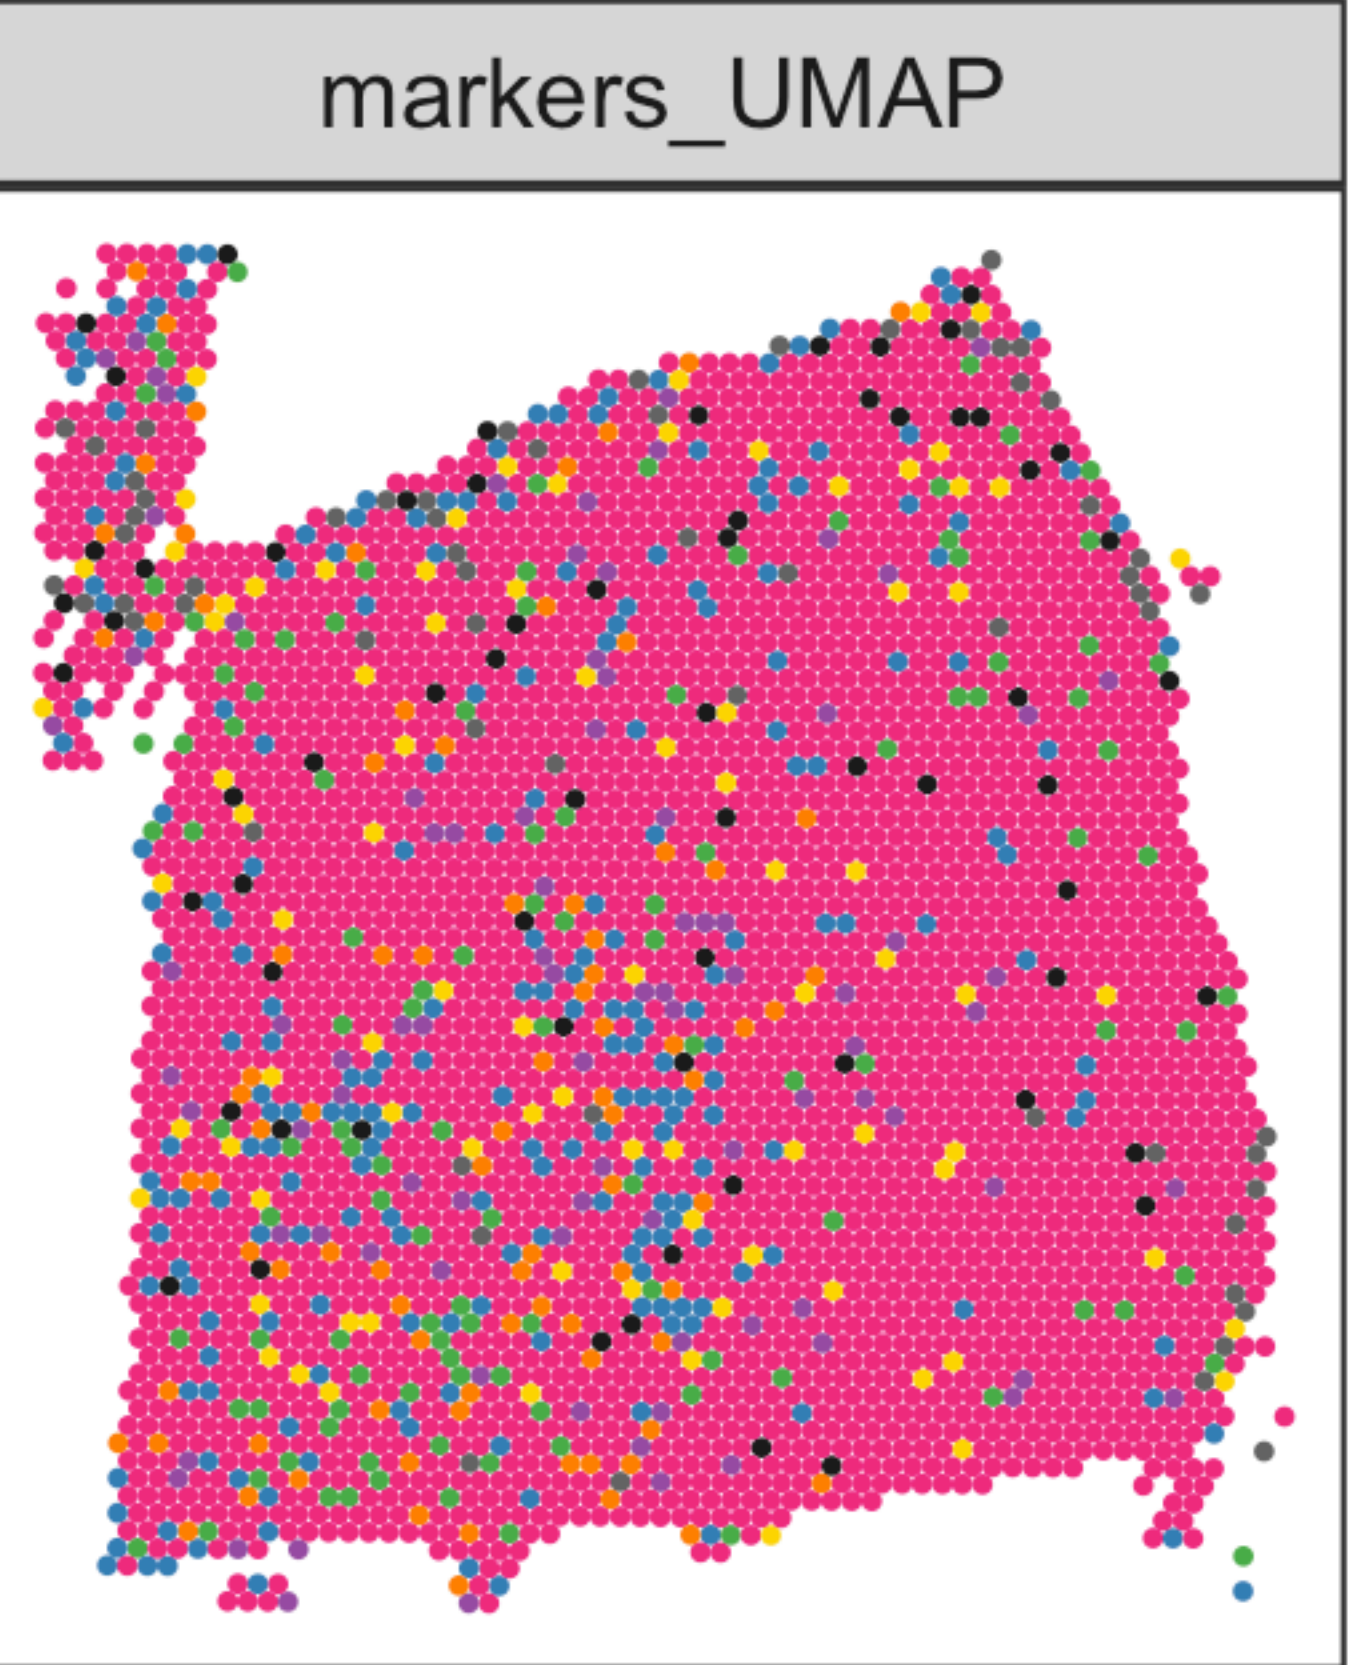

cluster

- 1
- 2
- 3
- 4
- 5
- 6
- 7
- 8

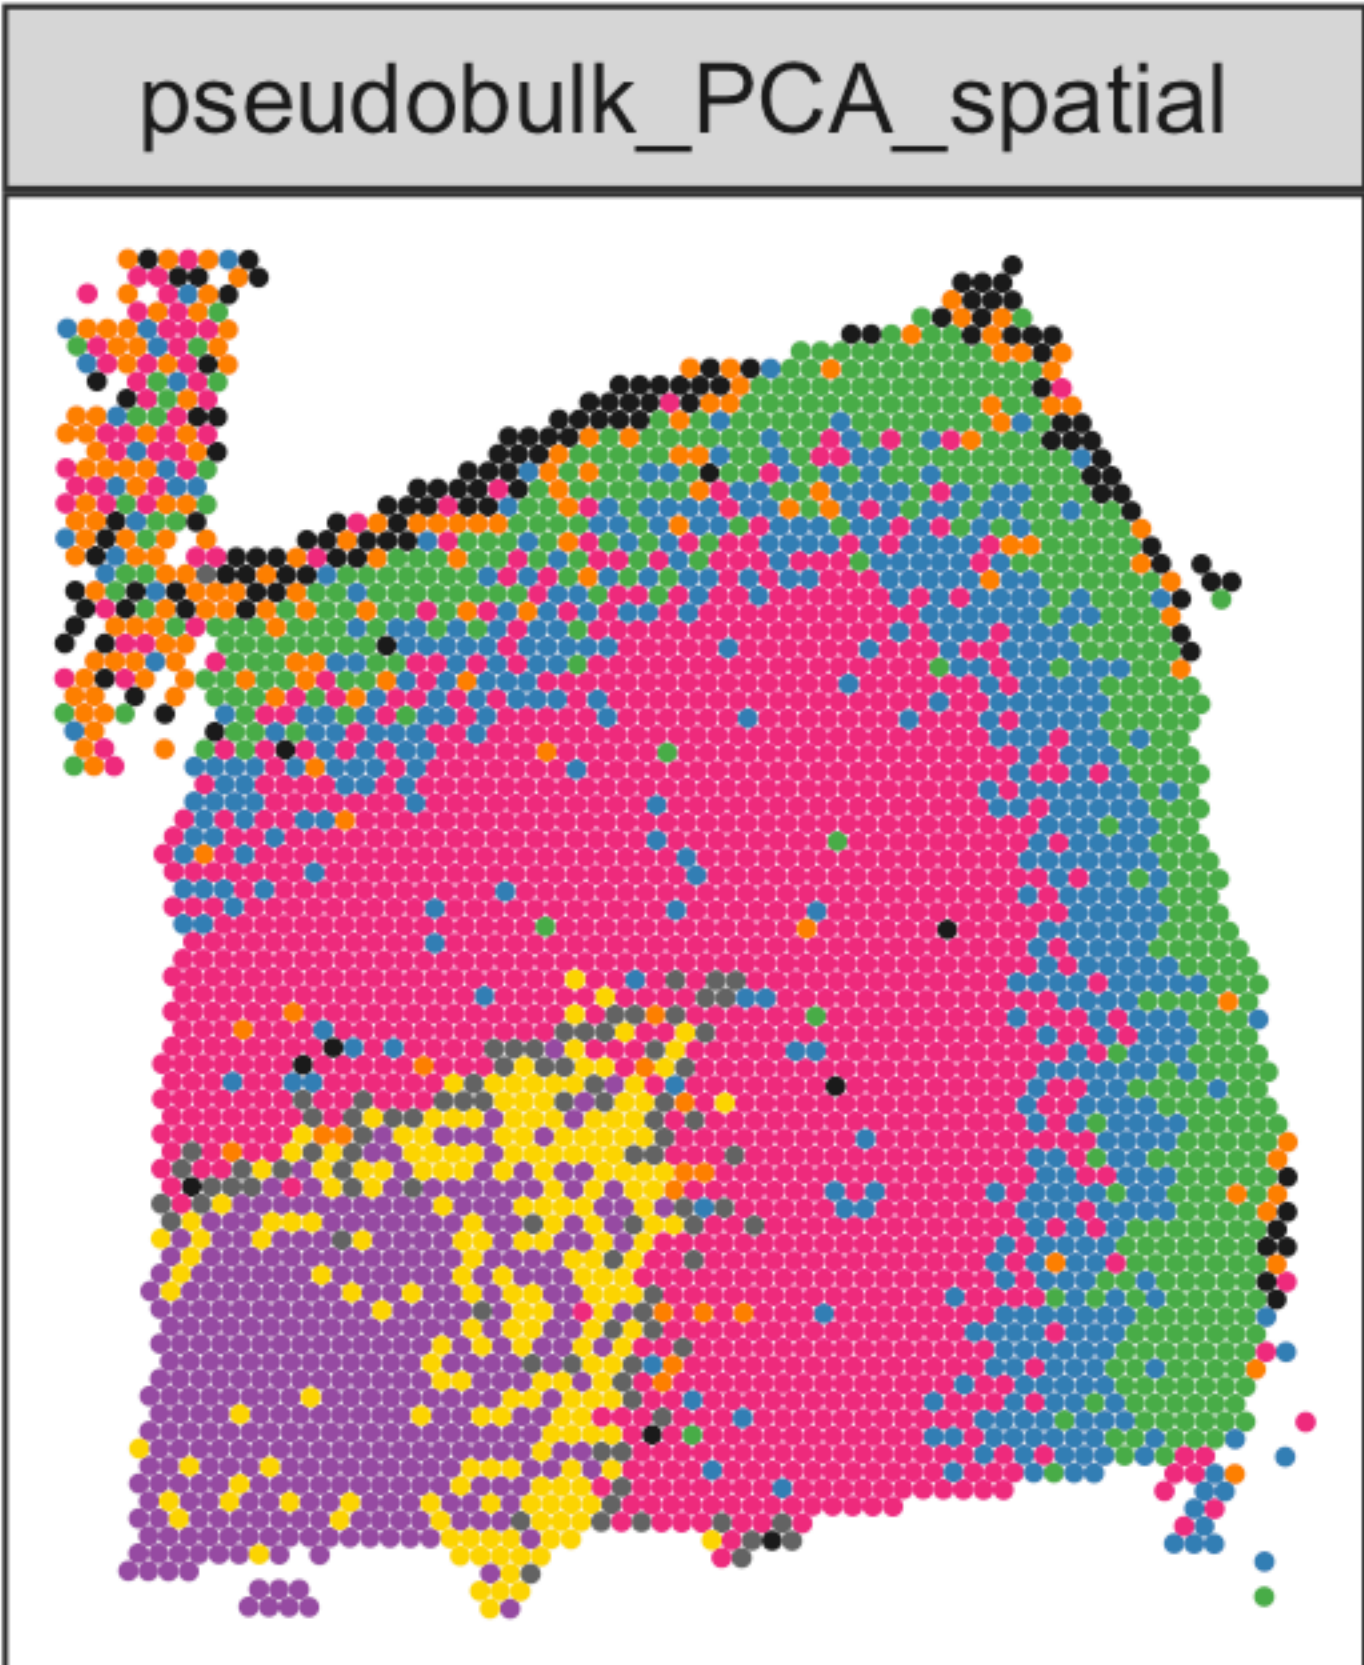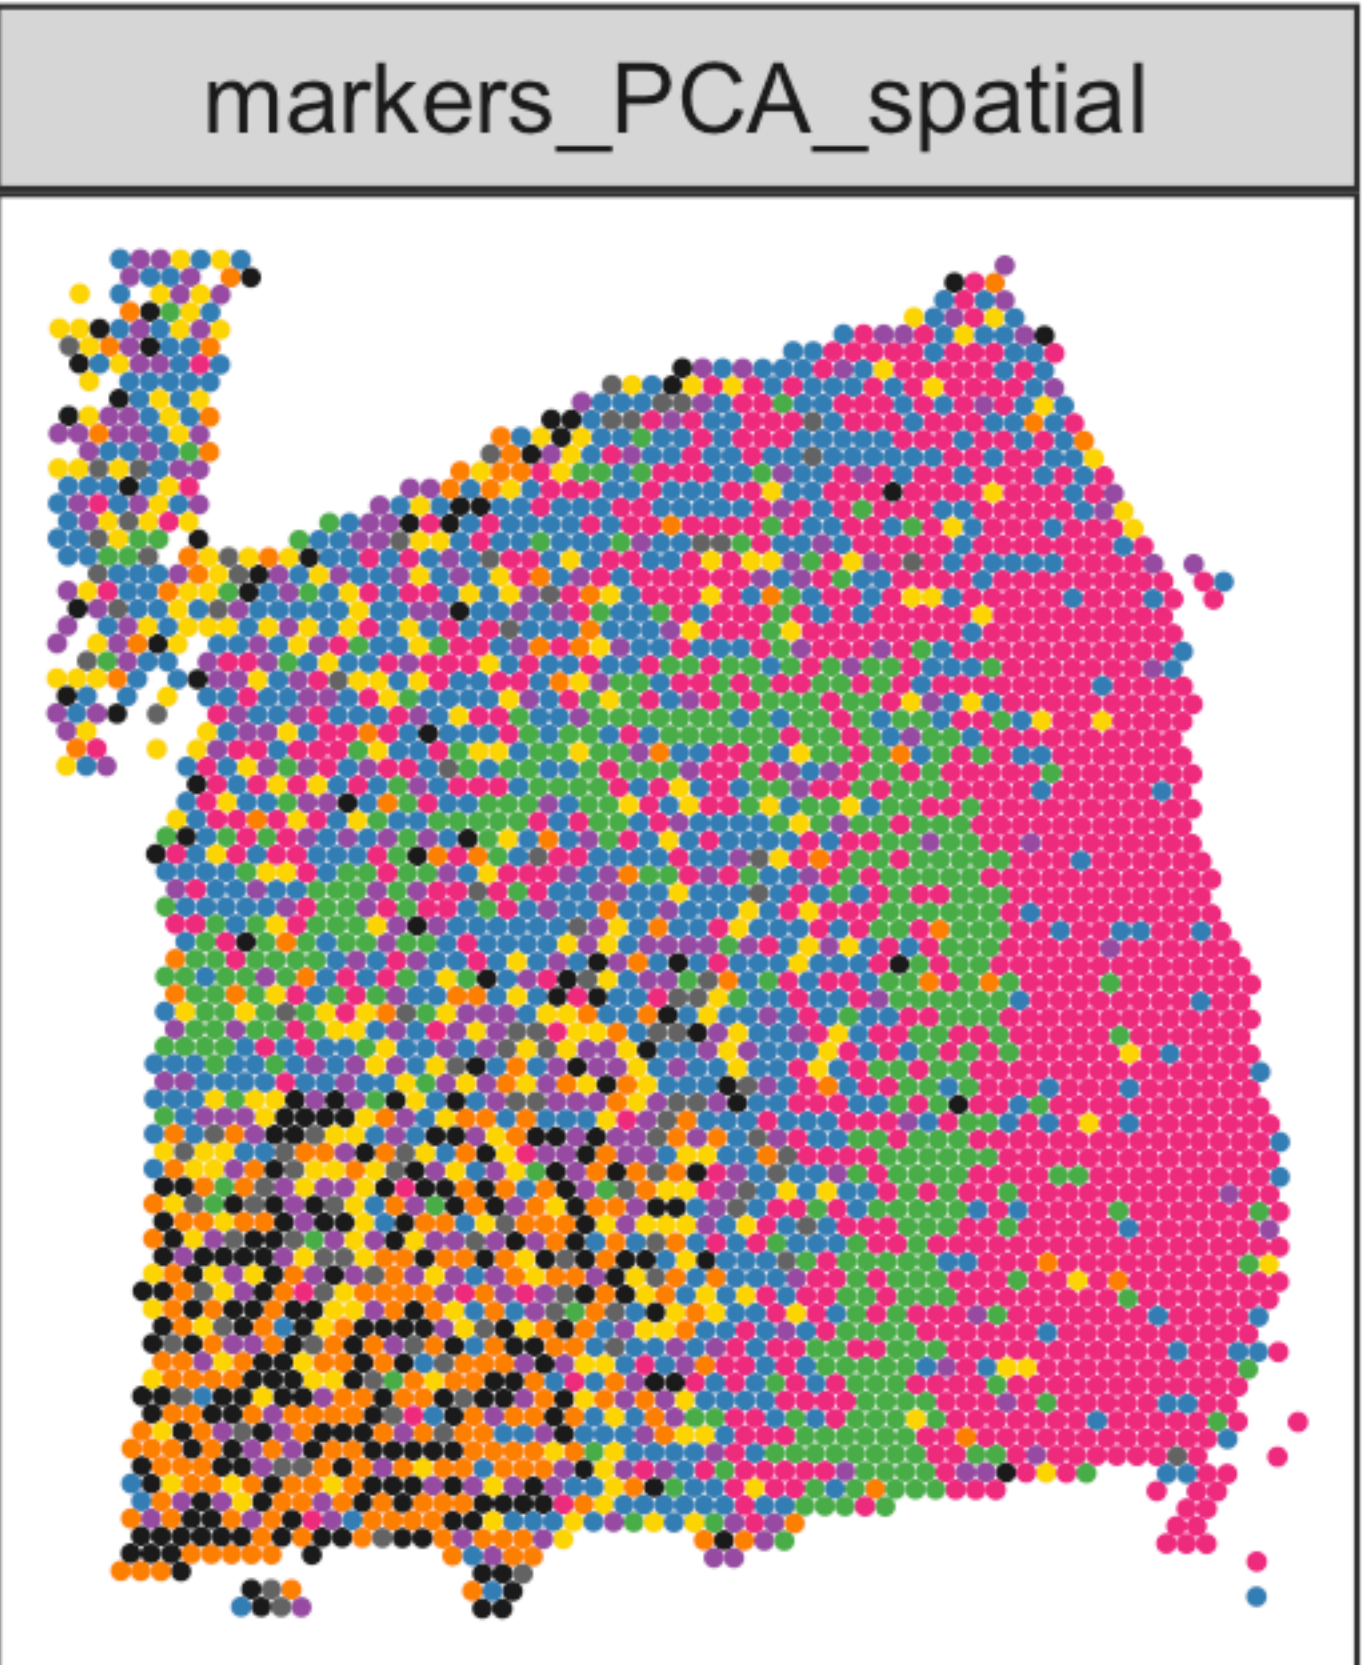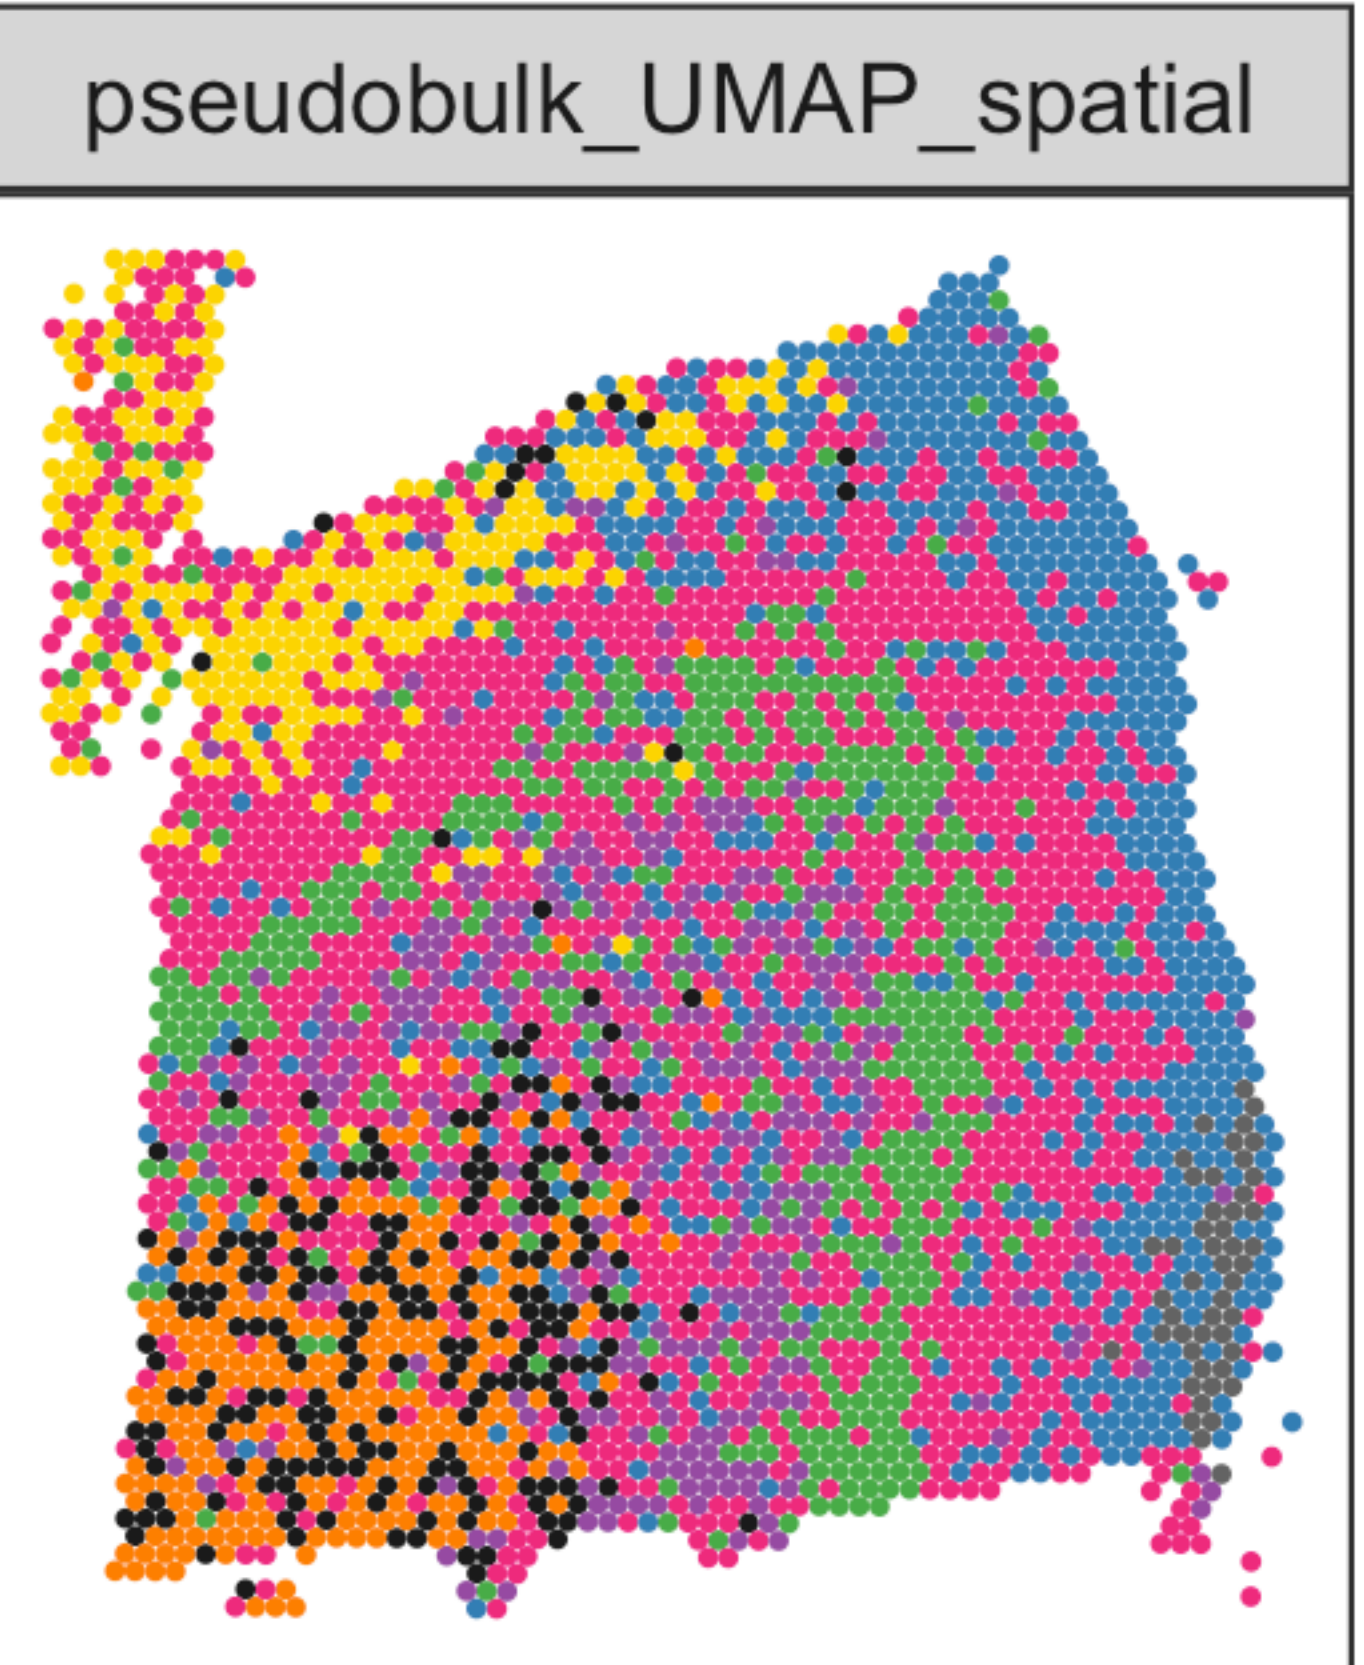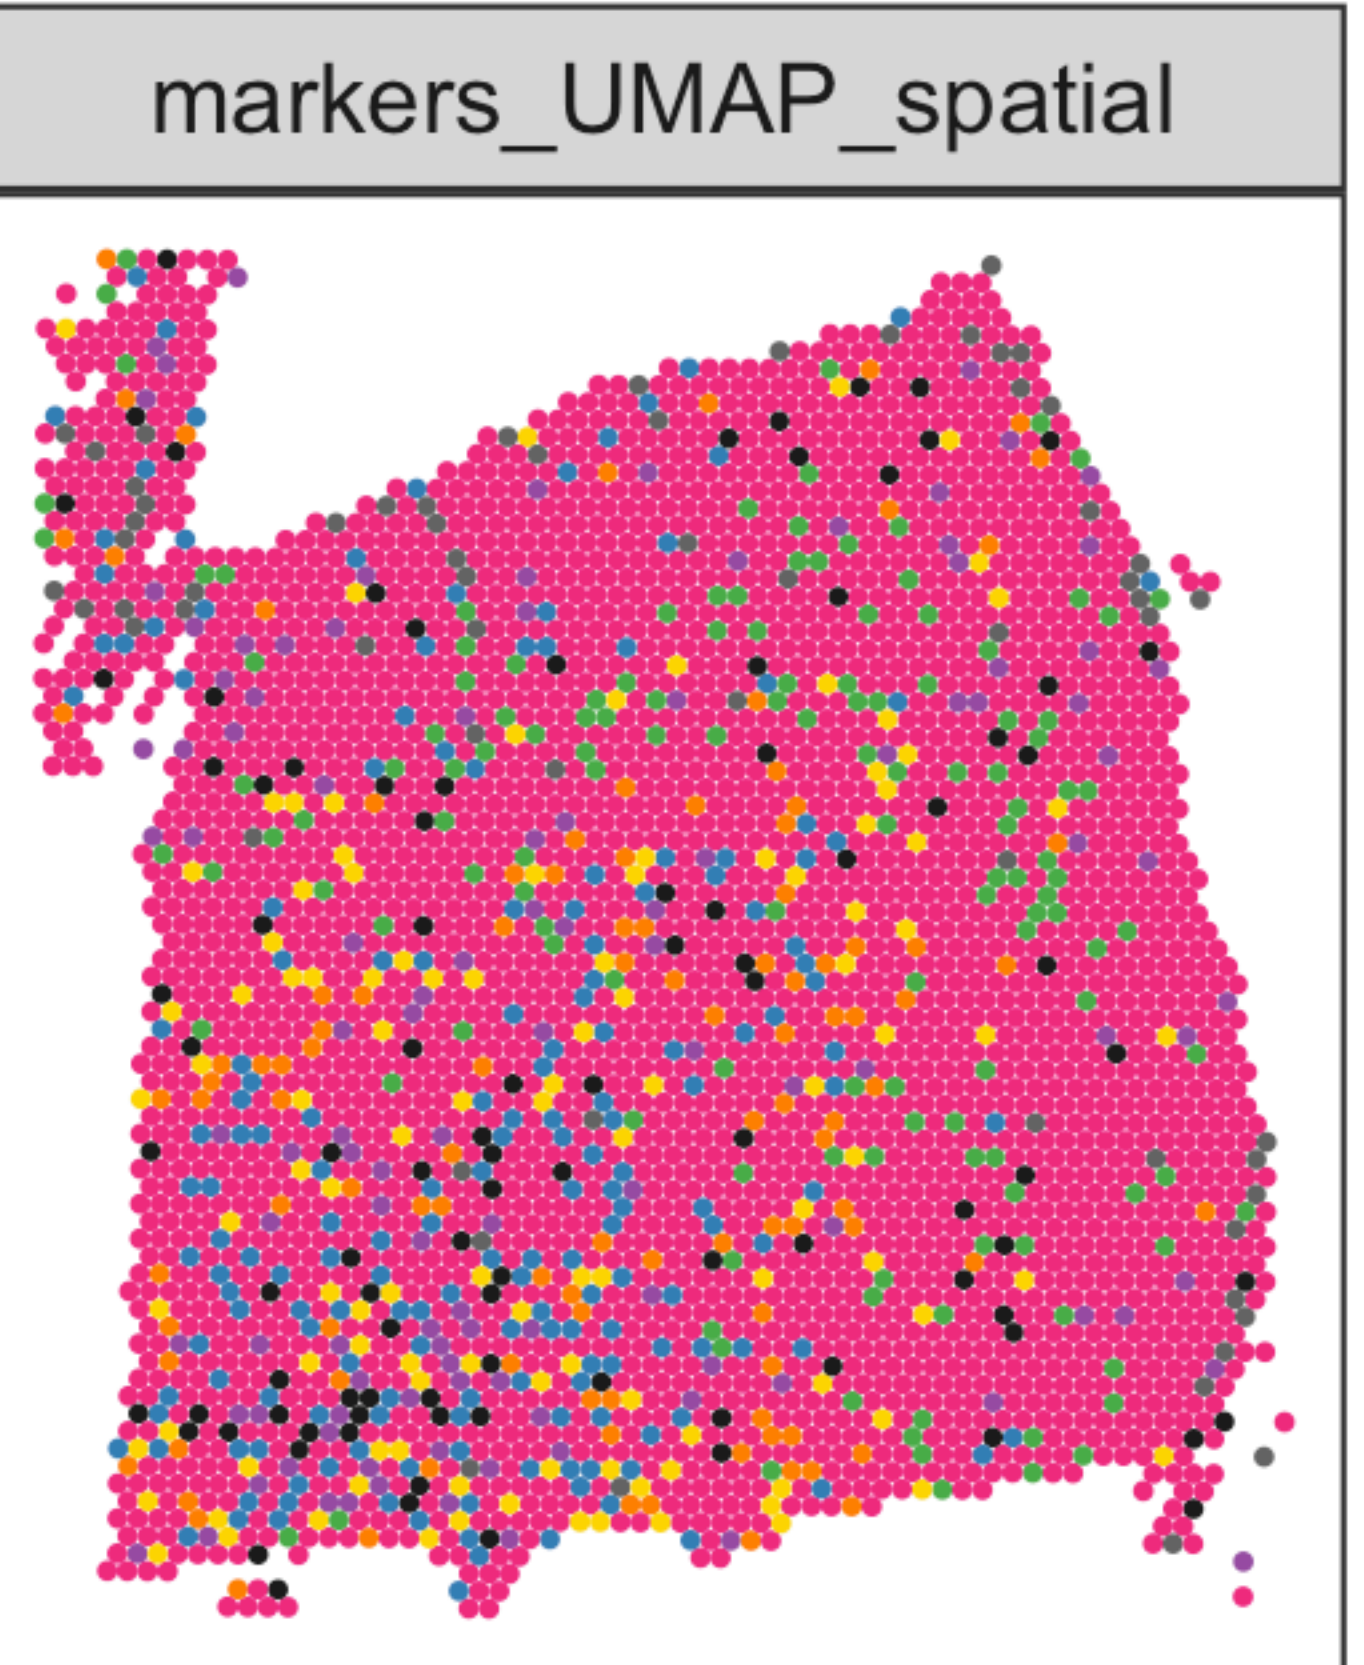



# Sample 151676: Clustering (unsupervised)

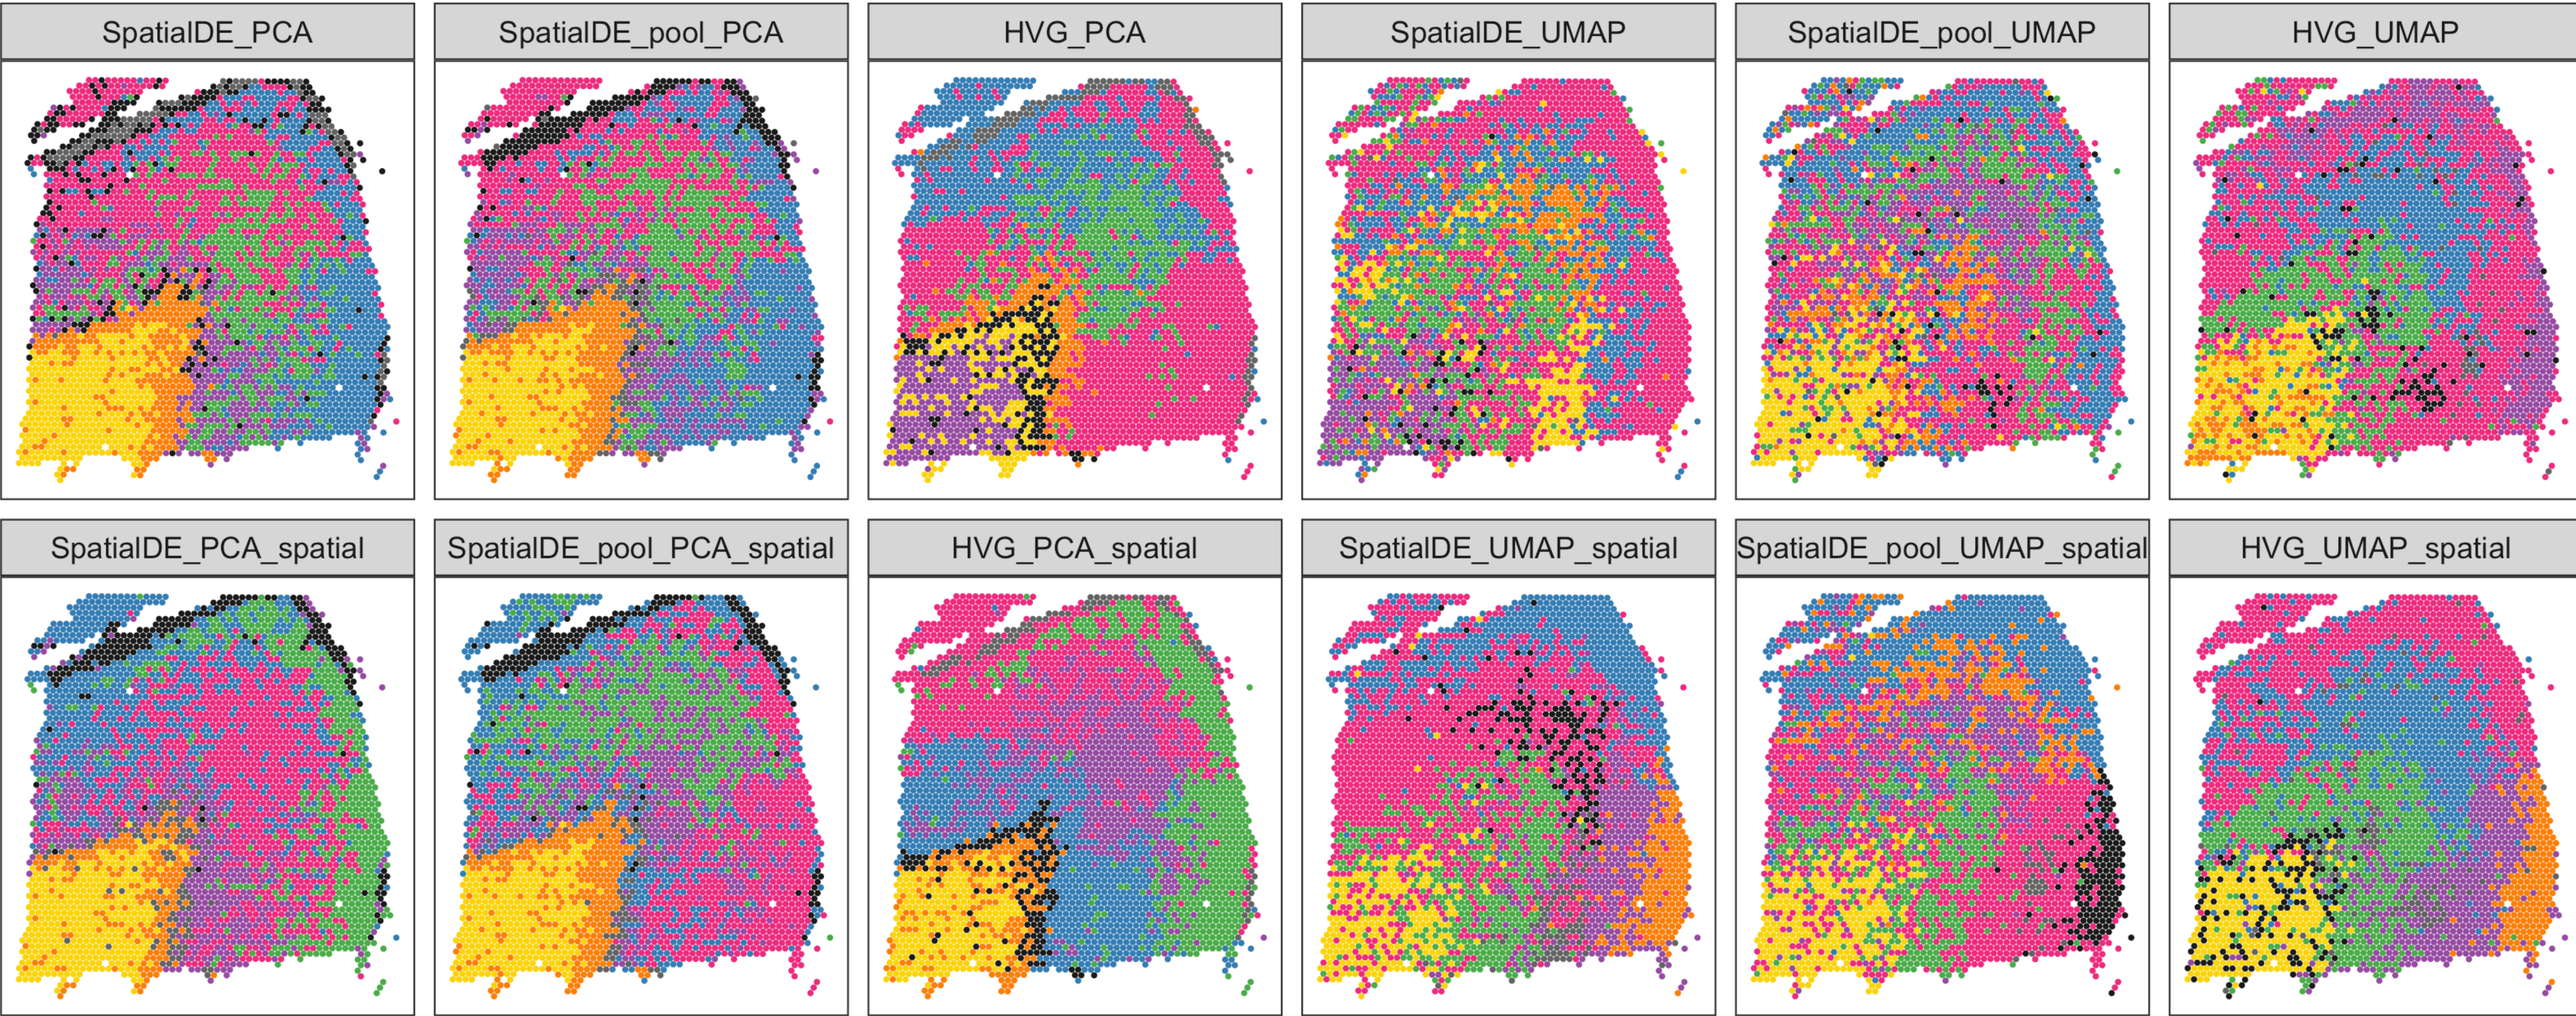



# Sample 151676: Clustering (semi-supervised and markers)

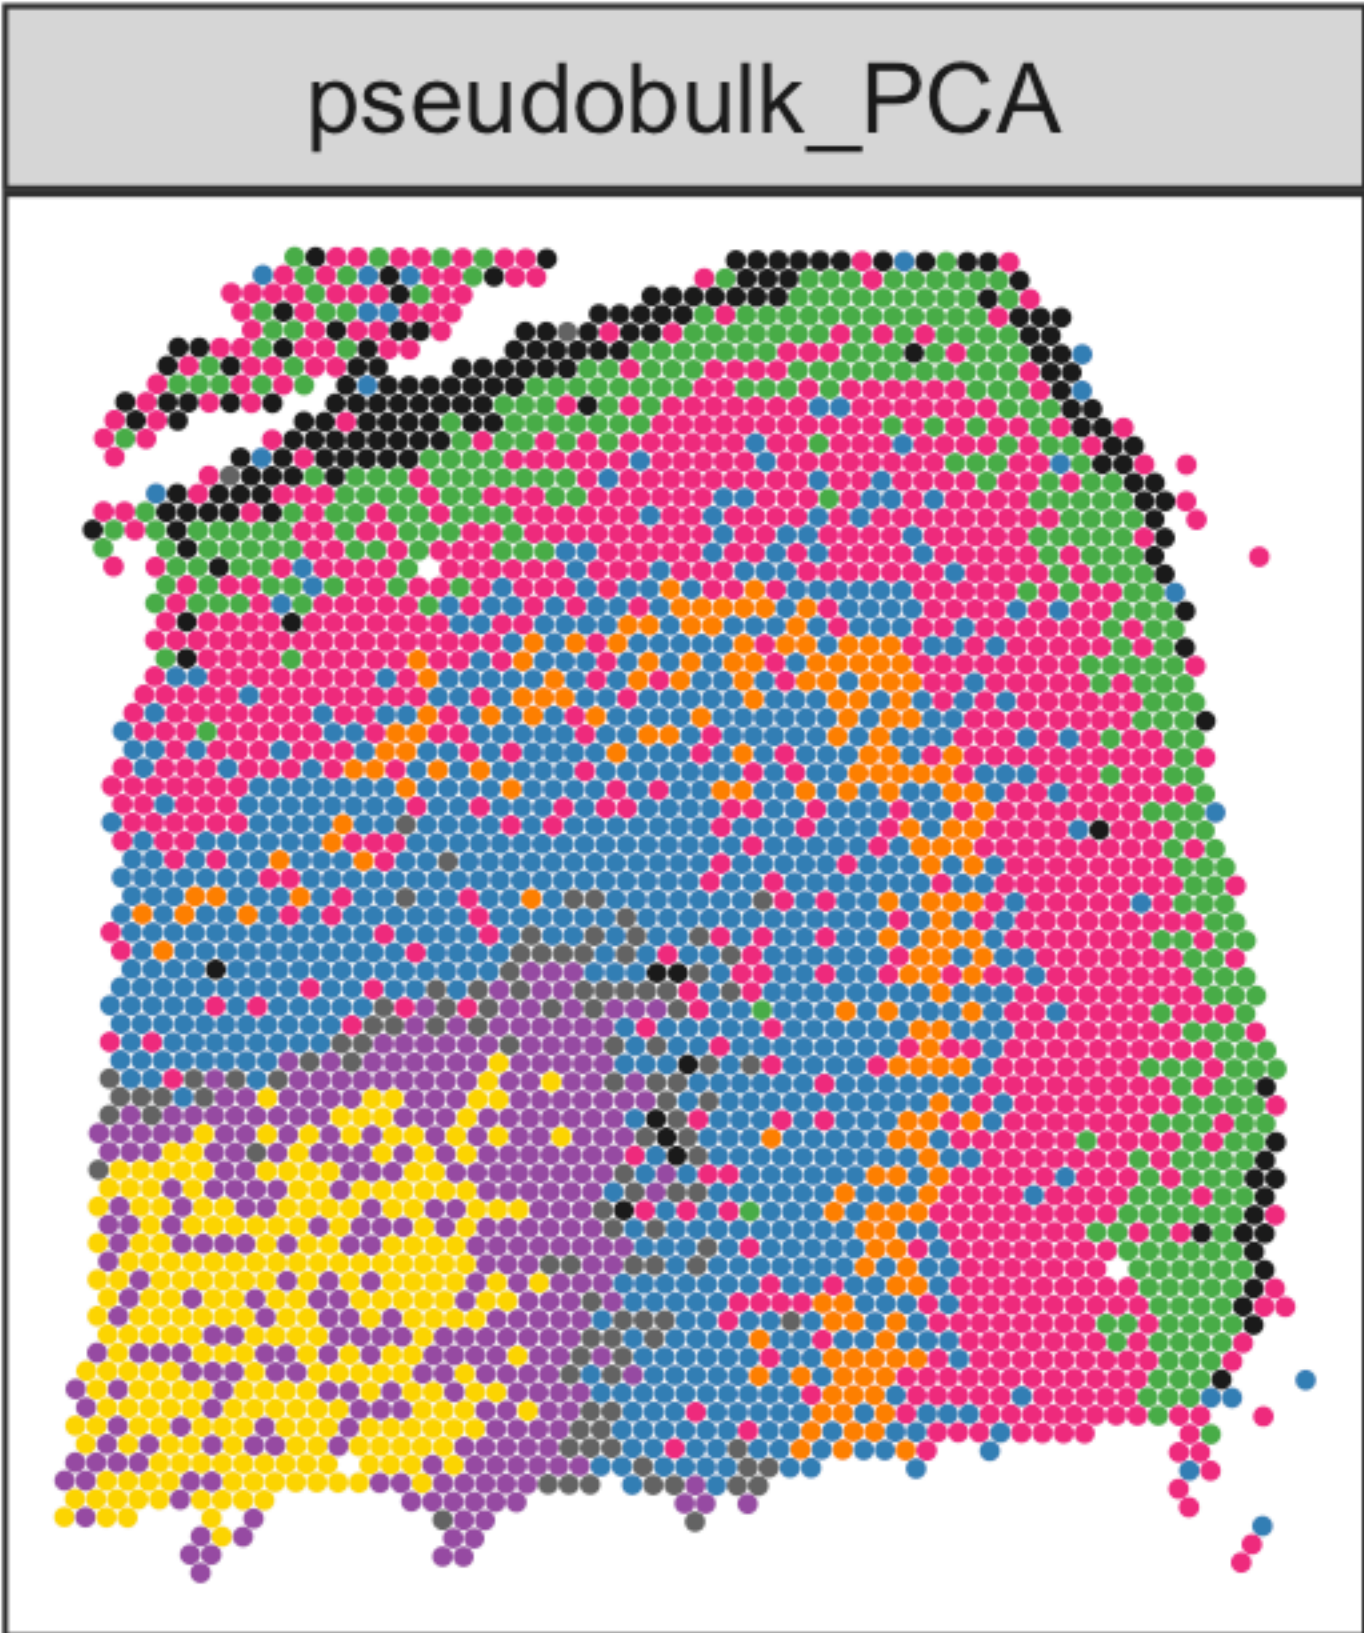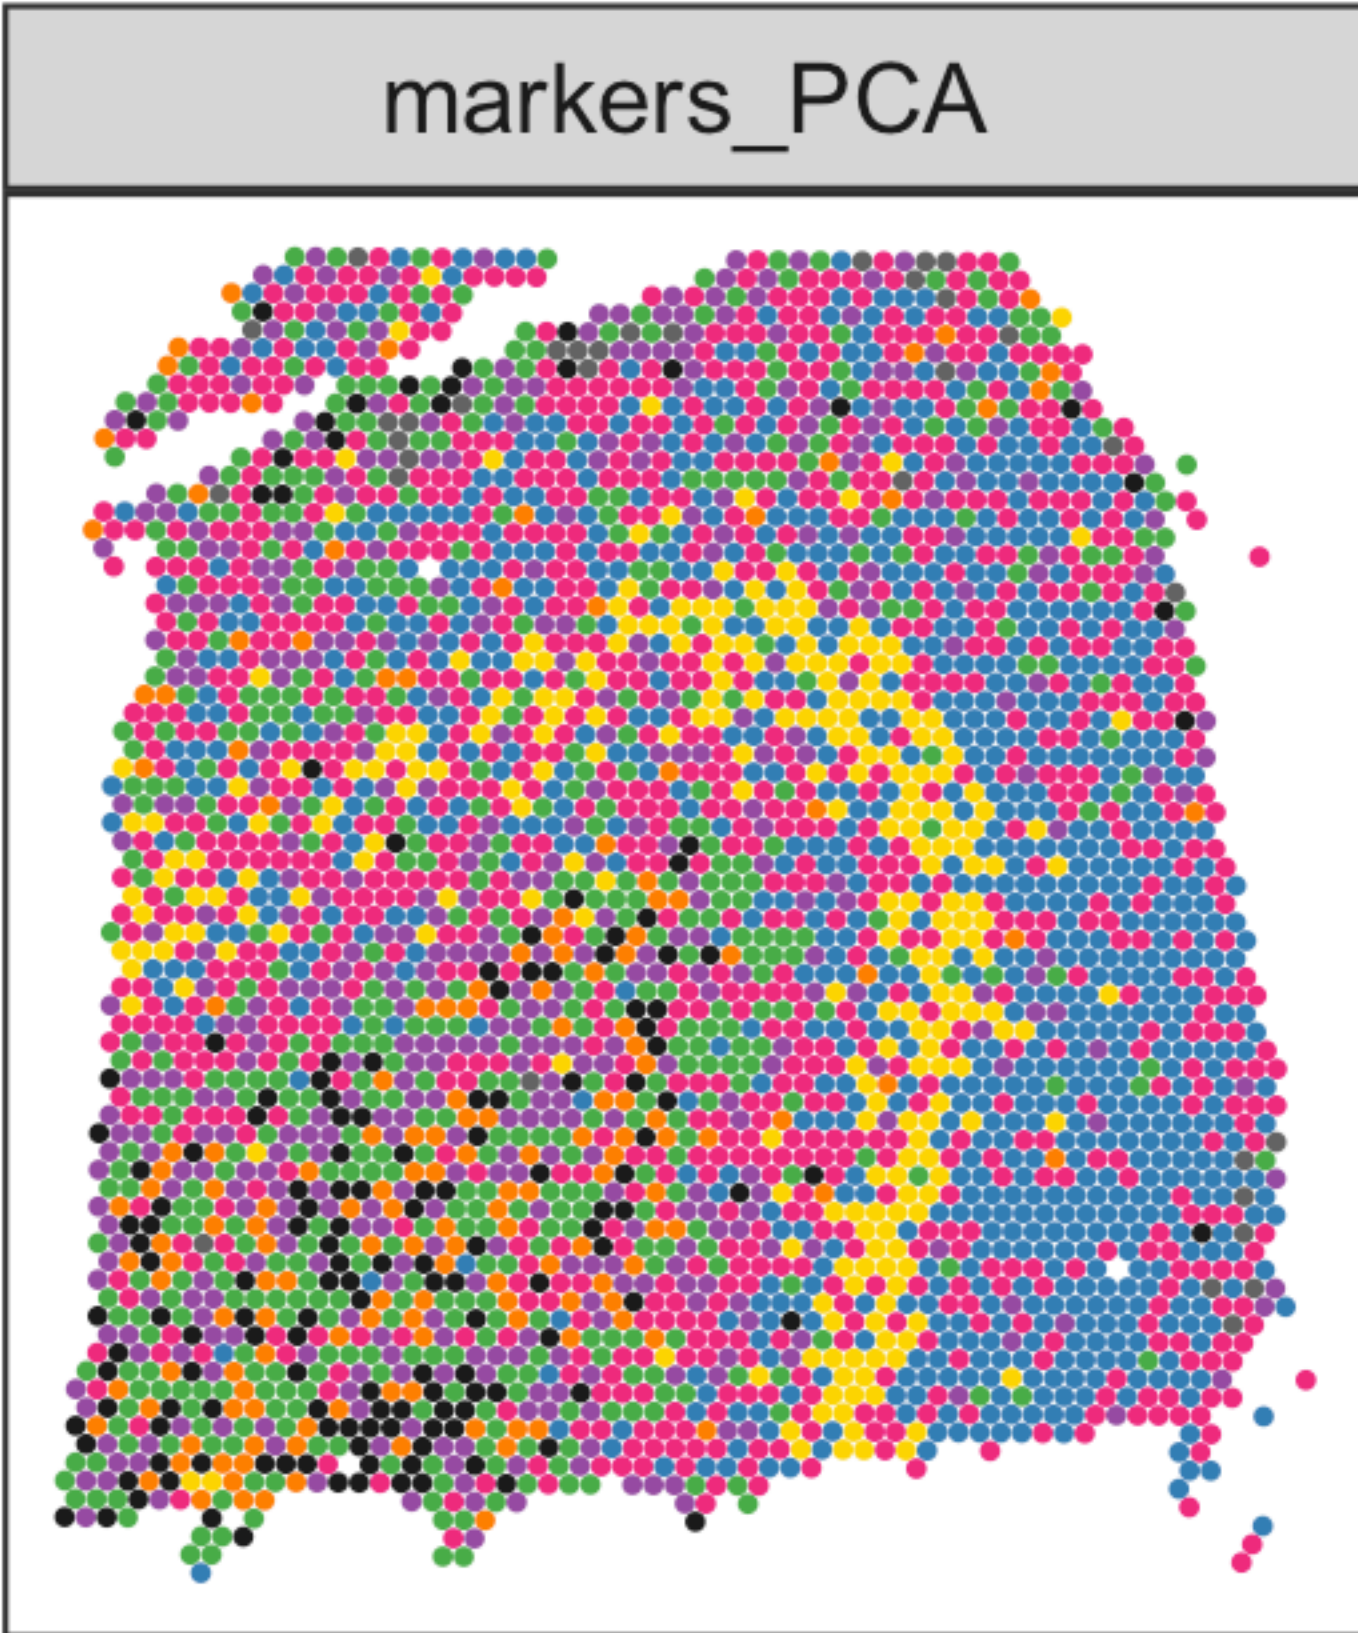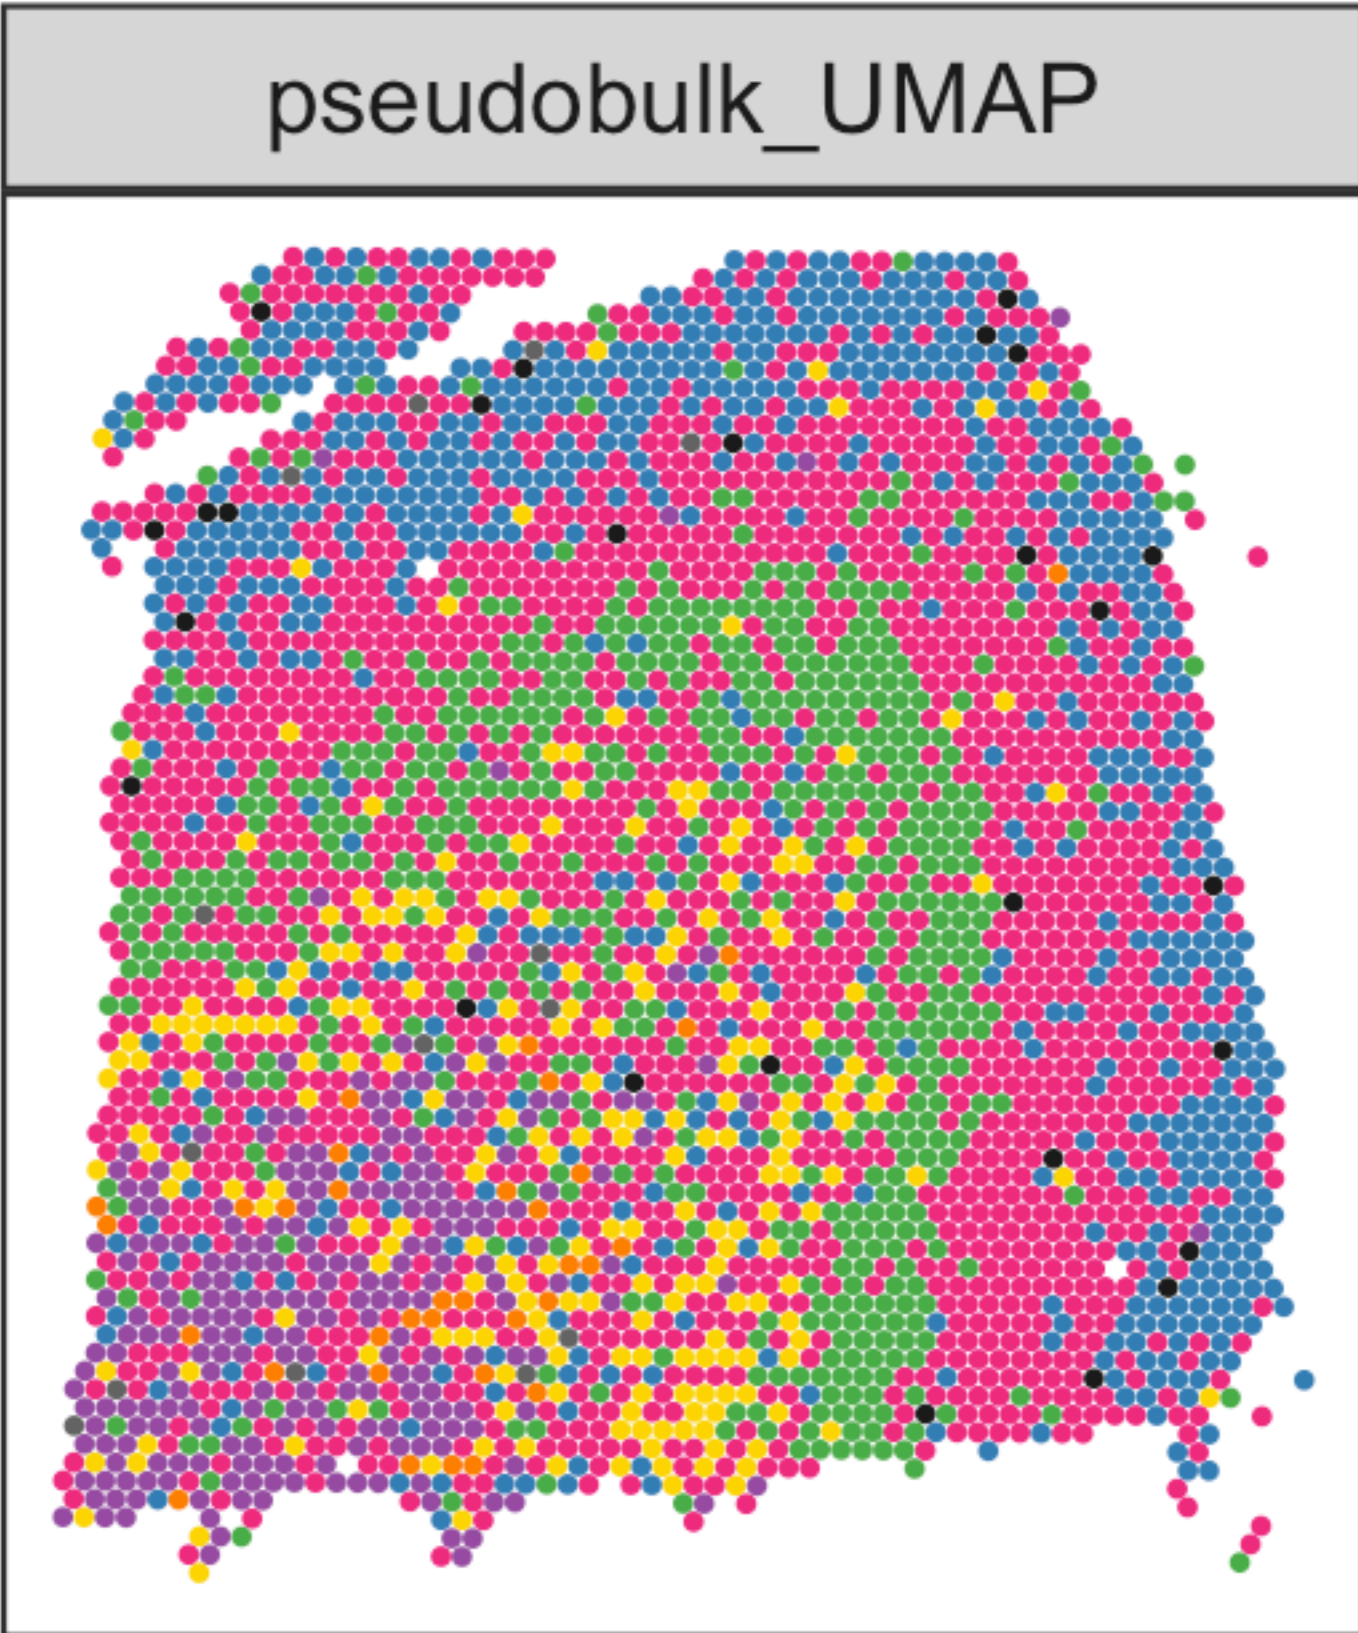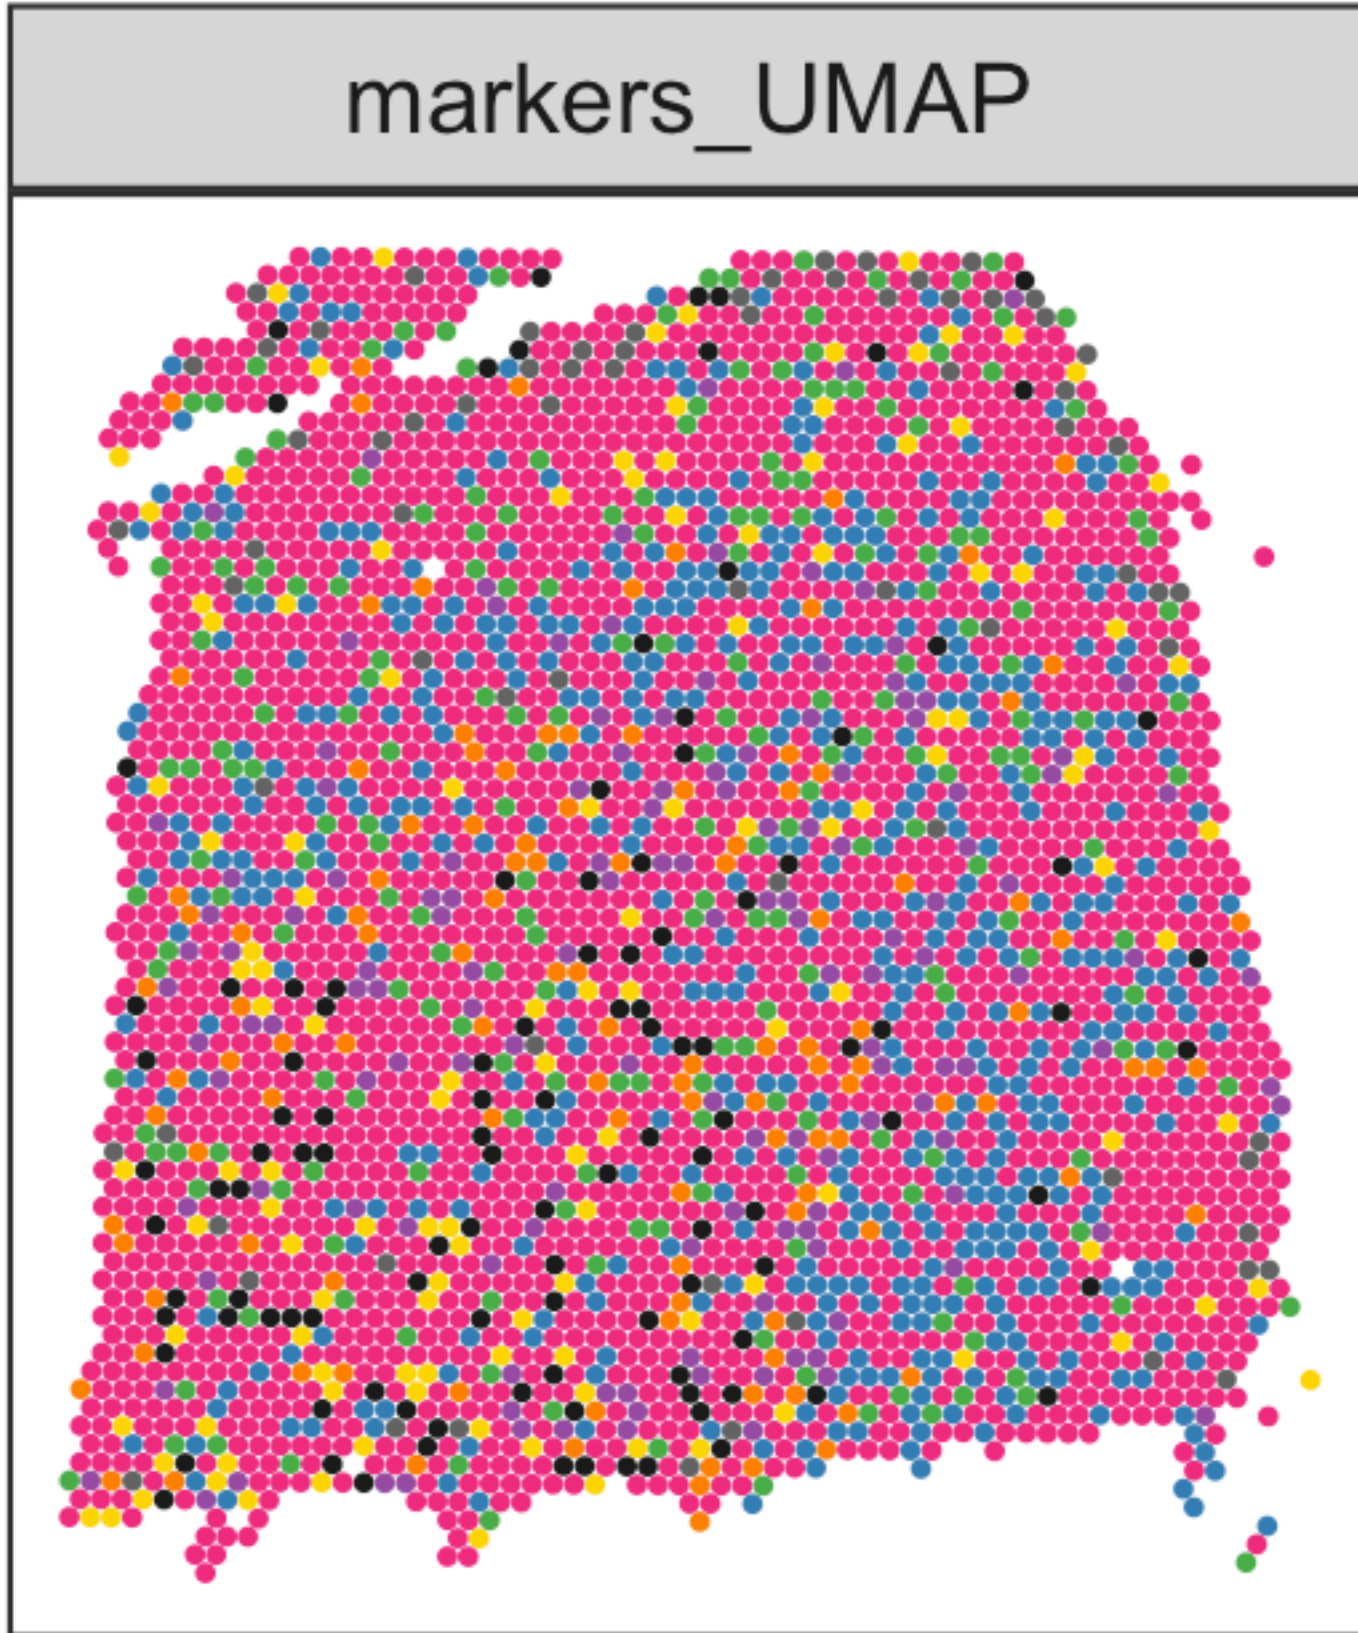

cluster

- 1
- 2
- 3
- 4
- 5
- 6
- 7
- 8

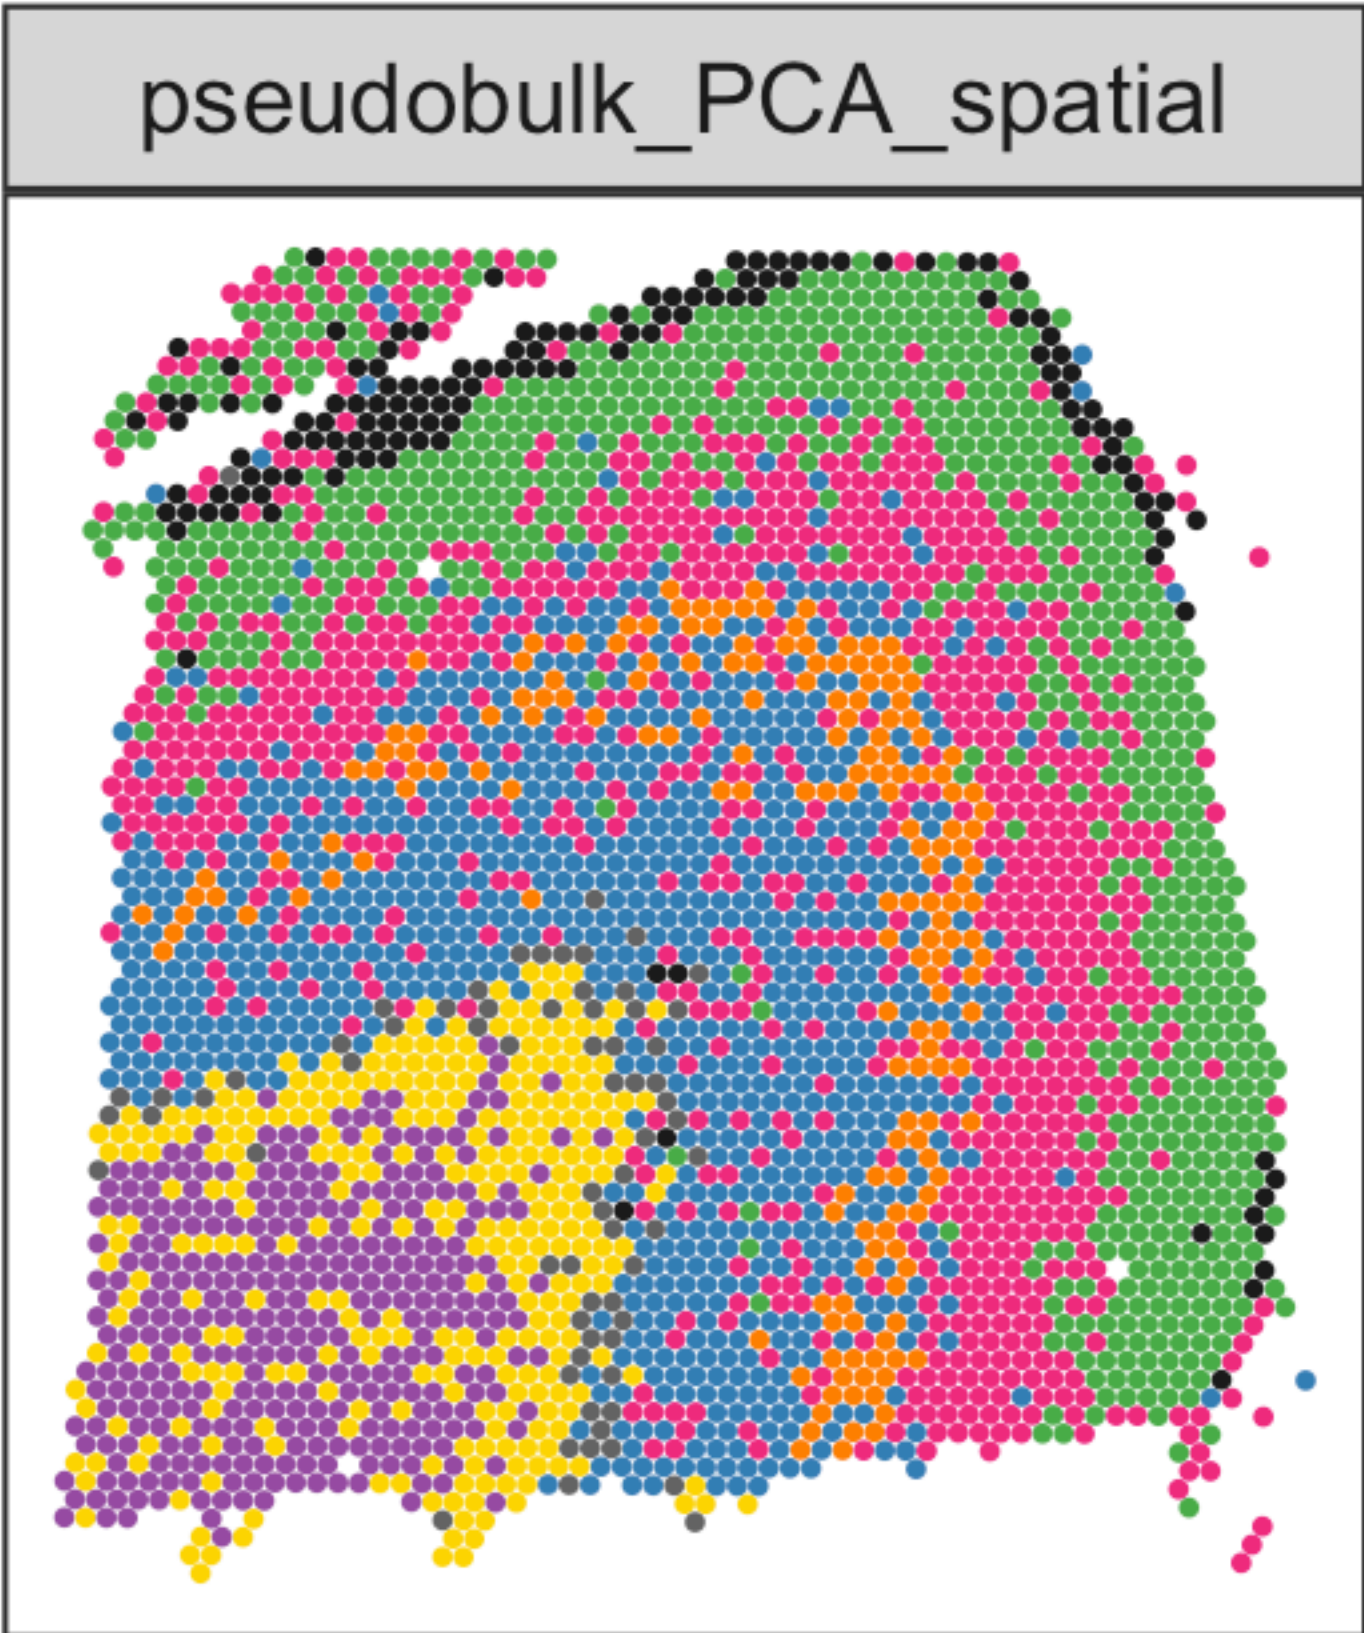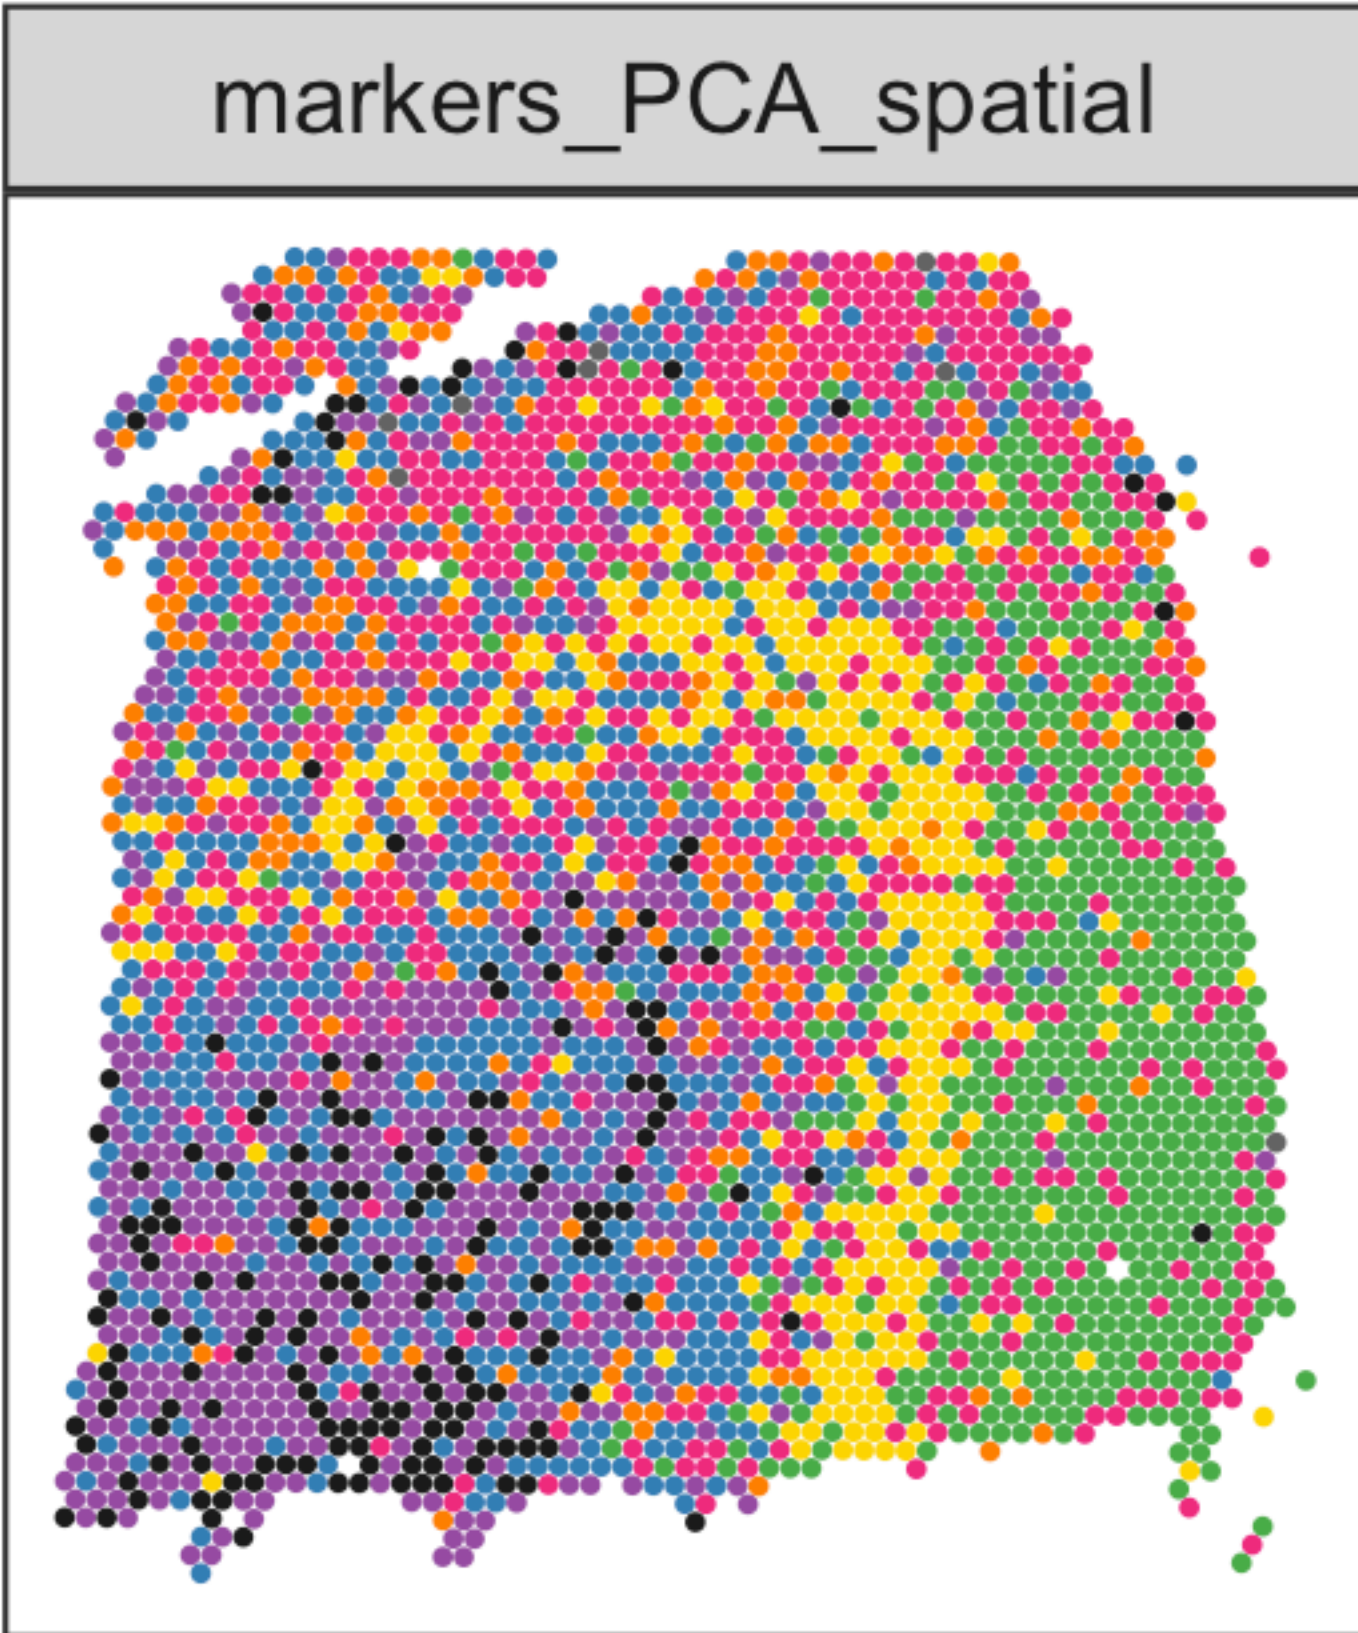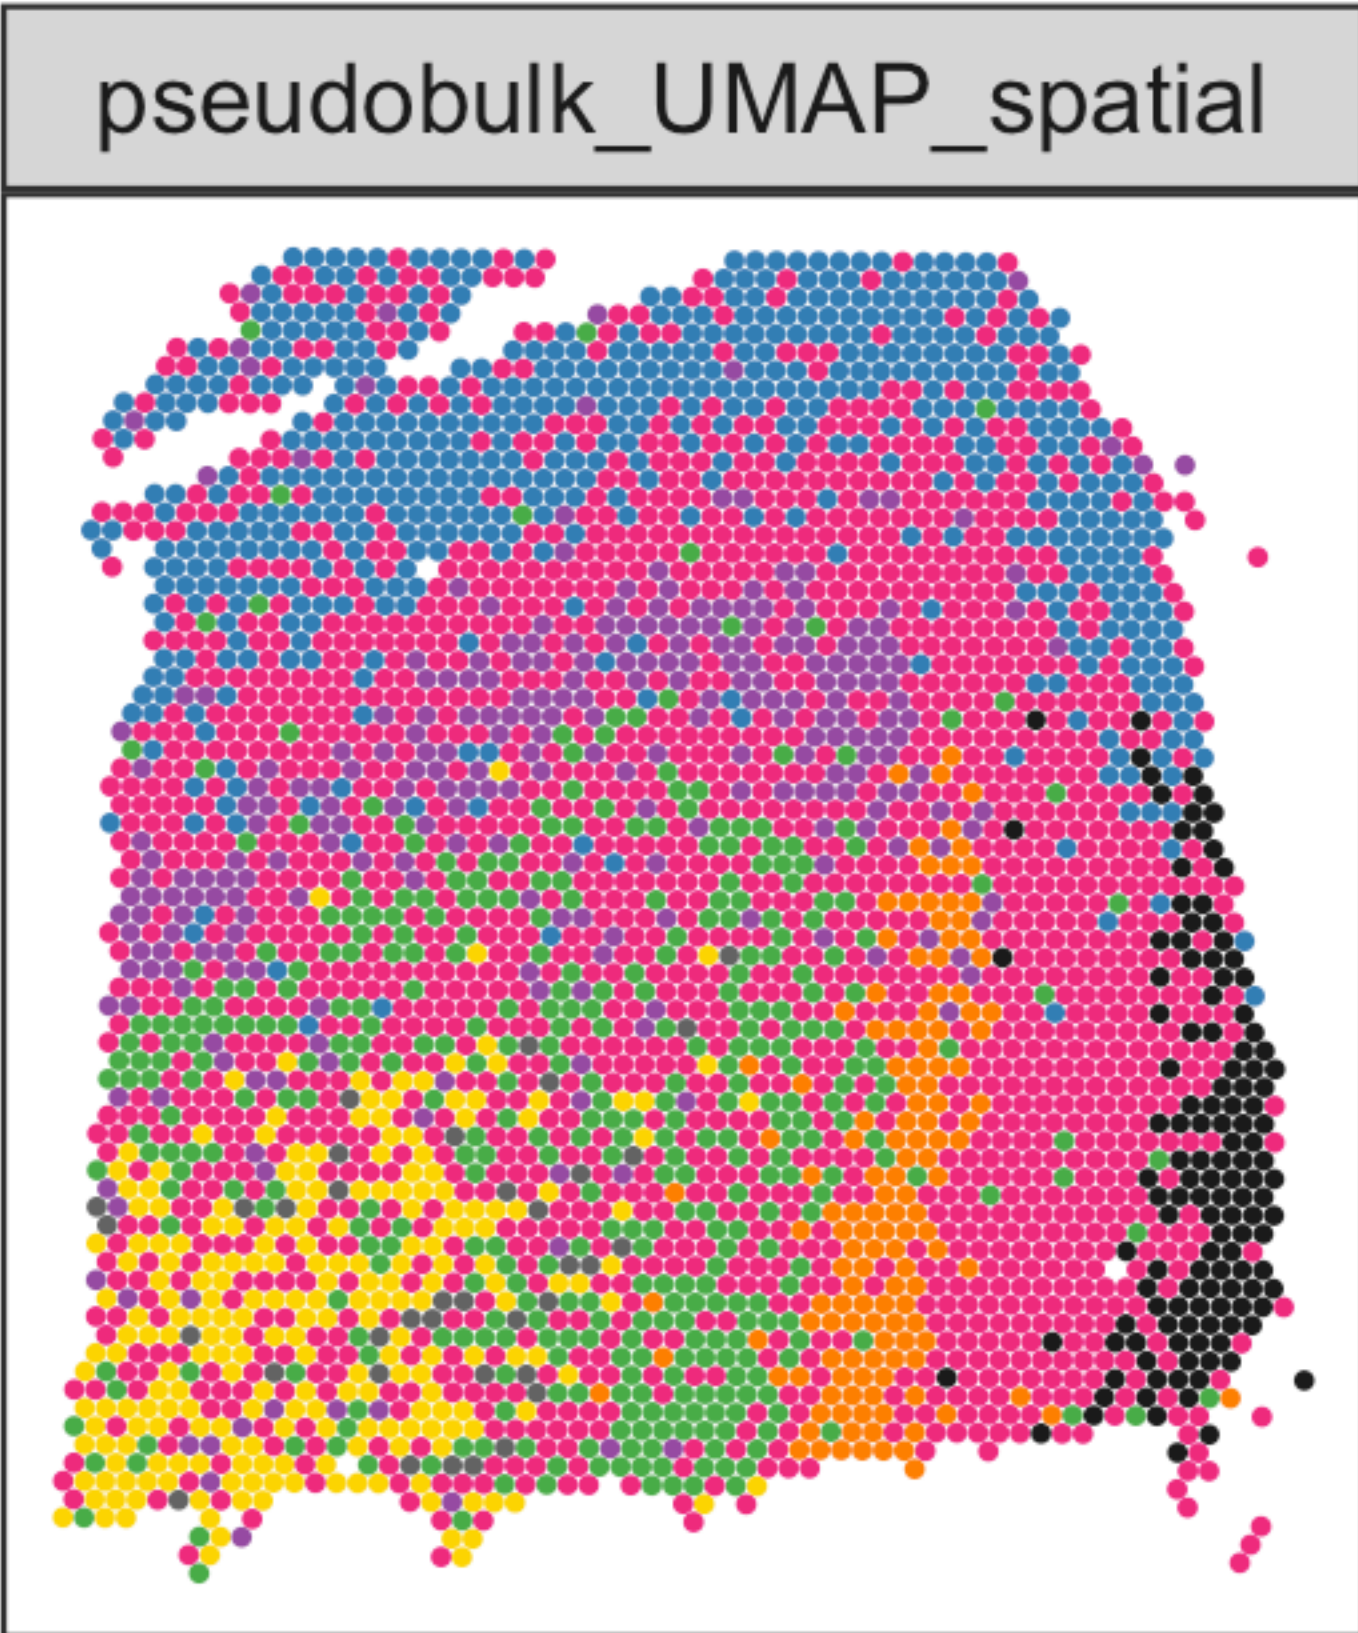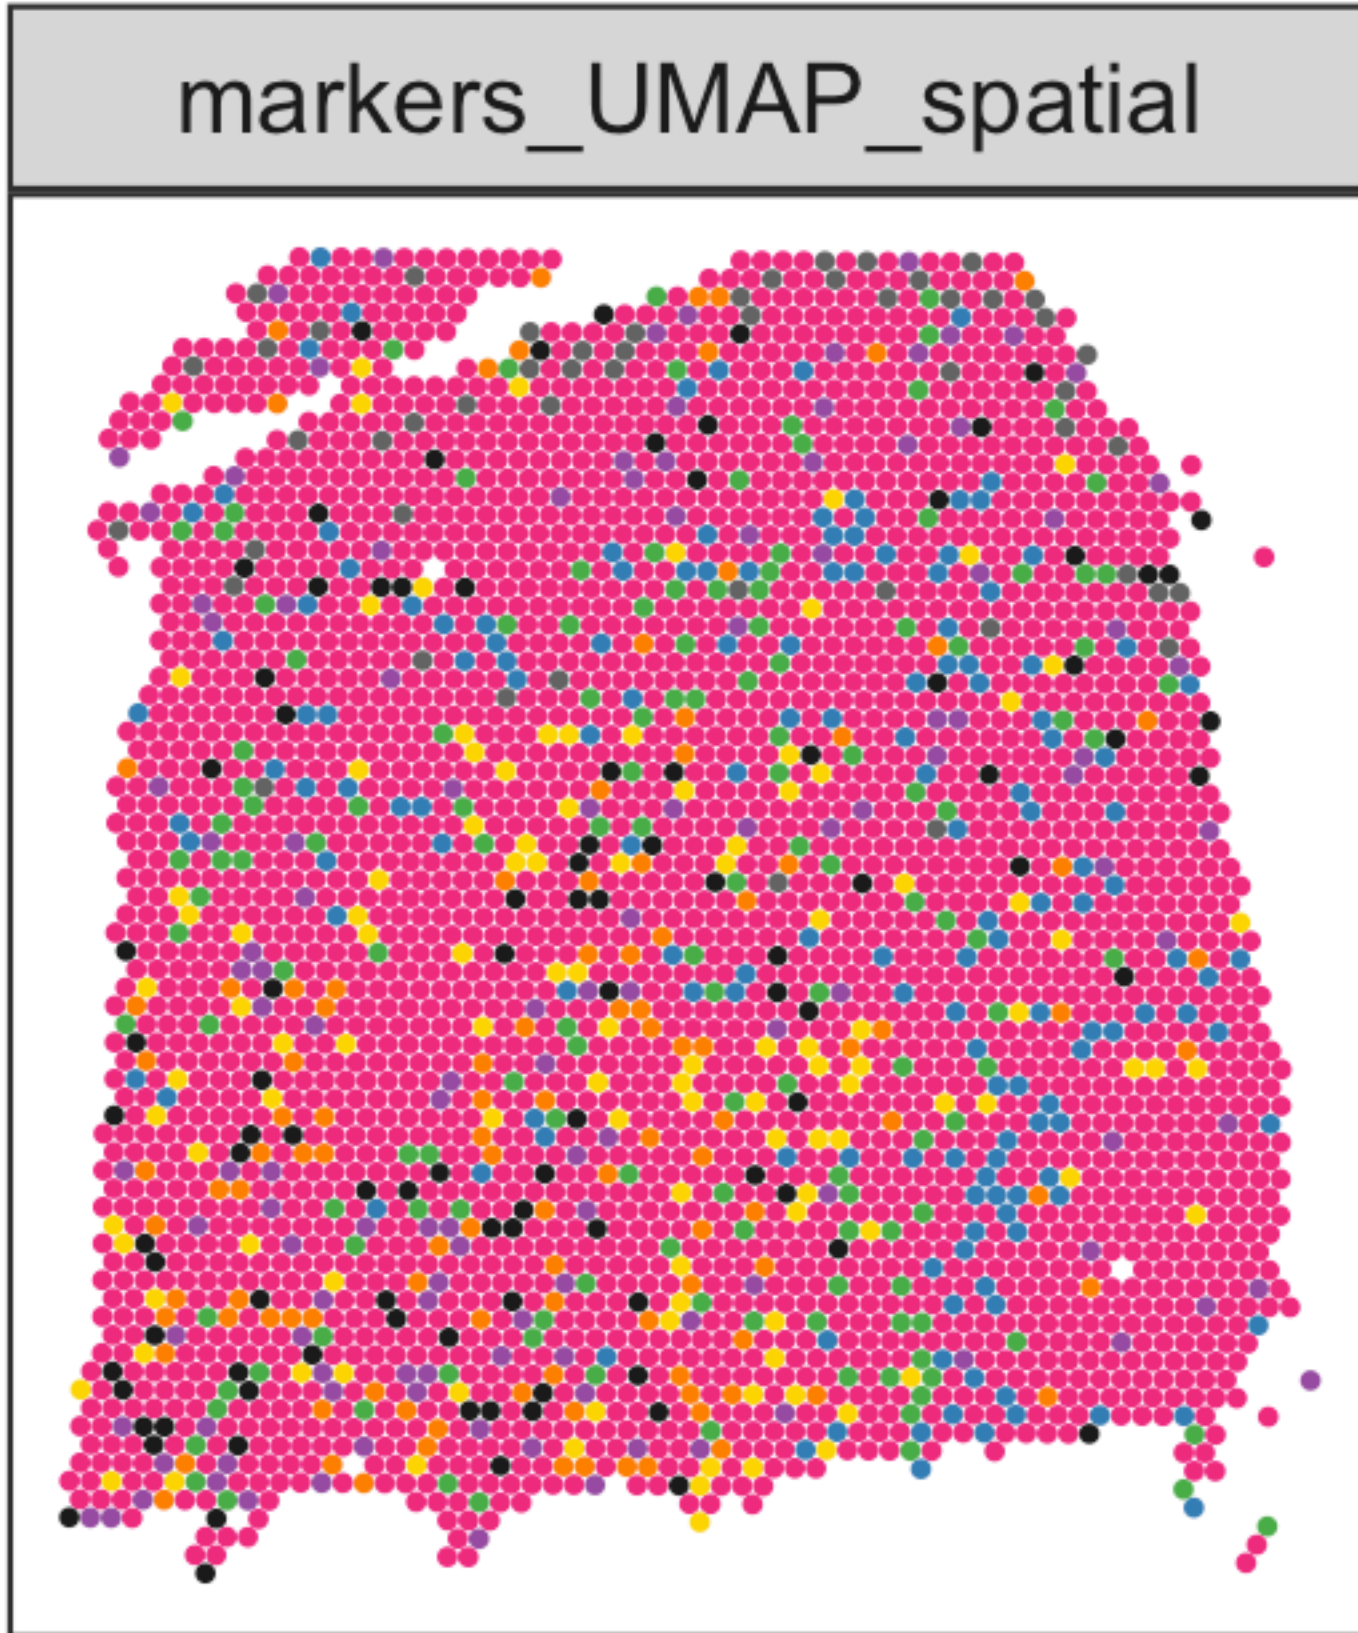

Supplement: NIHMS1656366-supplement-2.pdf [file NIHMS1656366-supplement-2.pdf]
